# Supplementary material
Source: Research Square preprint supplement (doi:10.21203/rs.3.rs-9657677/v1)
Supplement: Supplementary file 1 [file 7cca7f0c023b860898eb5d43.docx]

**Number of SNPs within 1Mb window size**

**a**

**b**

**Number of SNPs within 1Mb window size**

**Figure S1.** SNP distribution and density across the 21 wheat and seven *Ae. tauschii* chromosomes. Heatmaps illustrate the number of SNPs within a 1 Mb sliding window based on (a) the Chinese Spring IWGSC RefSeq v2.1 genome and (b) the *Ae. tauschii* Aet v4.0 genome. The vertical axis displays chromosomes, while the horizontal axis indicates physical position (Mb). The color gradient represents SNP density, with dark green and deep red indicating low and high densities, respectively.

**Figure S2**. The Q-Q plots of four models with Chinese Spring IWGSC RefSeq v2.1 genome.

**Figure S3**. The Q-Q plots of four models with *Ae. tauschii* Aet v4.0 genome.
