# Supplementary material
Source: Research Square preprint supplement (doi:10.21203/rs.3.rs-9657677/v1)
Supplement: Supplementary file 1 [file 61d0583e2b7924582b405c26.xlsx]

## Sheet: Table S1
Table S1. Reactions of synthetic hexaploid wheat (SHW) lines and their available durum wheat parents to greenbug biotype E.
Entry No.	Line No.a	Materials/Pedigreeb	Rep 1c	Rep 2c	Reaction Type
1	TA4152-28	68.111 / RGB-U // WARD /3/ Ae.tauschii (316)	7R	5R	R
2	TA4152-29	68.111 / RGB-U // WARD /3/ Ae.tauschii (326)	6R	3R	R
3	TA4152-37	68.111 / RGB-U // WARD /3/ Ae.tauschii (629)	9R	10R	R
4	TA4152-44	68.111 / RGB-U // WARD /3/ FGO /4/ RABI /5/ Ae.tauschii (878)	1MR/2S	8S	S
5	TA4152-47	68.111 / RGB-U // WARD /3/ FGO /4/ RABI /5/ Ae.tauschii (882)	9S	8MS	S
6	TA4152-49	68.111 / RGB-U // WARD /3/ FGO /4/ RABI /5/ Ae.tauschii (890)	3R	8R	R
7	TA4152-30	68112 / WARD // Ae.tauschii (369)	10R	8R	R
8	TA4152-31	68112 / WARD // Ae.tauschii (369)	4R	6R	R
9	TA4152-40	68.111 / RGB-U // WARD RESEL /3/ STIL /4/ Ae.tauschii (781)	5R	10R	R
10	TA4152-41	68.111 / RGB-U // WARD RESEL /3/ STIL /4/ Ae.tauschii (783)	8R	10R	R
11	TA4153-30	68.111 / RGB-U // WARD RESEL /3/ STIL /4/ Ae.tauschii (385)	10R	8R	R
12	TA4153-32	68.111 / RGB-U // WARD RESEL /3/ STIL /4/ Ae.tauschii (431)	10R	10R	R
13	TA4152-1	Altar 84 / Ae.tauschii (188)	7R	8R	R
14	TA4152-3	Altar 84 / Ae.tauschii [TA 1651] (192)	9R	10R	R
15	TA4152-4	Altar 84 / Ae.tauschii (193)	9R	6R	R
16	TA4152-5	Altar 84 / Ae.tauschii (198)	4S	6S	S
17	TA4152-7	Altar 84 / Ae.tauschii (205)	9R	9R	R
18	TA4152-9	Altar 84 / Ae.tauschii (211)	8R	6R	R
19	TA4152-16	Altar 84 / Ae.tauschii (219)	8R	5R	R
20	TA4152-20	Altar 84 / Ae.tauschii (221)	10R	9R	R
21	TA4152-25	Altar 84 / Ae.tauschii (224)	10S	10S	S
22	TA4152-52	Altar 84 / Ae.tauschii (JBANGOR)	4MS	7MS	MS
23	TA4152-90	Altar 84 / Ae.tauschii (502)	10R	10R	R
24	TA4152-75	Arlin 1/ Ae.tauschii (283)	8R	5R	R
25	TA4153-4	Arlin 1 / Ae.tauschii (218)	10R	9R	R
26	TA4153-24	Arlin 1 / Ae.tauschii (368)	10S	10S	S
27	TA4153-28	Arlin 1 / Ae.tauschii (335)	10R	10R	R
28	TA4152-64	Botno / Ae.tauschii (617)	7S	10S	S
29	TA4152-65	Botno / Ae.tauschii (620)	4S	10S	S
30	TA4152-66	Botno / Ae.tauschii (625)	10S	10S	S
31	TA4152-54	Cerceta / Ae.tauschii (895)	7S	9S	S
32	TA4152-85	Cerceta / Ae.tauschii (174)	10R	10R	R
33	TA4152-92	Cerceta / Ae.tauschii (1024)	10R	10R	R
34	TA4152-94	Cerceta / Ae.tauschii (1027)	10R	10R	R
35	TA4153-12	Cerceta / Ae.tauschii (1025)	1R	2R	R
36	TA4153-14	Cerceta / Ae.tauschii (386)	10R	4R	R
37	TA4153-15	Cerceta / Ae.tauschii (392)	10R	9R	R
38	TA4153-16	Cerceta / Ae.tauschii (533)	10R	9R	R
39	TA4153-18	Cerceta / Ae.tauschii (1031)	10MS	10MS	MS
40	TA4153-19	Cerceta / Ae.tauschii (1038)	10S	10S	S
41	TA4153-20	Cerceta / Ae.tauschii (1046)	1R	10R	R
42	TA4153-21	Cerceta / Ae.tauschii (386)	8S	10S	S
43	TA4153-23	Cerceta / Ae.tauschii (368)	10R	10R	R
44	TA4153-31	Cerceta / Ae.tauschii (417)	10MR	9MR	MR
45	TA4152-8	CPI / GEDIZ /3/GOO //JO /CRA /4/ Ae.tauschii (208)	9R	5R	R
46	TA4152-88	CPI / GEDIZ /3/ GOO // JO / CRA /4/ Ae.tauschii (409)	4R	7R	R
47	TA4153-17	CPI / GEDIZ /3/ GOO // JO / CRA /4/ Ae.tauschii (1018)	6S	8S	S
48	TA4152-24	Croc 1 / Ae.tauschii (224)	10S	10S	S
49	TA4152-39	Croc 1 / Ae.tauschii (725)	3R	10R	R
50	TA4152-46	Croc 1 / Ae.tauschii (879)	7MS	5MS	MS
51	TA4152-91	Croc 1 / Ae.tauschii (517)	10R	10R	R
52	TA4153-22	Croc 1 / Ae.tauschii (212)	10MS	10MS	MS
53	TA4152-10	D67.2 / P66.270 // Ae.tauschii (211)	9R	5R	R
54	TA4152-11	D67.2 / P66.270 // Ae.tauschii (213)	9S	10S	S
55	TA4152-13	D67.2 / P66.270 // Ae.tauschii (217)	10R	10R	R
56	TA4152-15	D67.2 / P66.270 // Ae.tauschii (218)	10R	10R	R
57	TA4152-18	D67.2 / P66.270 // Ae.tauschii (220)	10R	6R	R
58	TA4152-21	D67.2 / P66.270 // Ae.tauschii (221)	10R	10R	R
59	TA4152-22	D67.2 / P66.270 // Ae.tauschii (222)	7R	10R	R
60	TA4152-56	D67.2 / P66.270 // Ae.tauschii (257)	8R	10R	R
61	TA4152-68	D67.2 / P66.270 // Ae.tauschii (633)	6R	10R	R
62	TA4152-69	D67.2 / P66.270 // Ae.tauschii (659)	8R	10R	R
63	TA4153-8	D67.2 / P66.270 // Ae.tauschii (308)	10S	10S	S
64	TA4153-26	D67.2 / P66.270 // Ae.tauschii (1015)	10S	10S	S
65	TA4153-5	TK SN1081 / Ae.tauschii (222)	10R	10R	R
66	TA4152-42	Yar / Ae.tauschii (783)	6S	8S	S
67	TA4152-63	Yar / Ae.tauschii (518)	5R	8R	R
68	TA4152-53	YAV 2 / TEZ // Ae.tauschii (249)	6R	10R	R
69	TA4152-74	YAV 2 / TEZ // Ae.tauschii (895)	10R	10R	R
70	TA4152-19	Dverd 2 / Ae.tauschii (221)	10R	8R	R
71	TA4152-93	Dverd 2 / Ae.tauschii (1027)	7S	10S	S
72	TA4153-3	Dverd 2 / Ae.tauschii (214)	10MS	10MS	MS
73	TA4152-55	Gan / Ae.tauschii (180)	3R	10R	R
74	TA4152-73	Gan / Ae.tauschii (897)	8R	10R	R
75	TA4153-6	Gan / Ae.tauschii (236)	10S	10S	S
76	TA4153-27	Gan / Ae.tauschii (206)	10R	9R	R
77	TA4153-29	Gan / Ae.tauschii (335)	10R	8R	R
78	TA4152-76	Falcin 1 / Ae.tauschii (312)	6S	4S	S
79	TA4152-57	LCK59.61 / Ae.tauschii (313)	9R	10R	R
80	TA4153-10	LCK59.61 / Ae.tauschii (693)	10MS	10MS	MS
81	TA4152-12	ROK / KML // Ae.tauschii (214)	10MS	10MS	MS
82	TA4152-27	GARZA / BOY // Ae.tauschii (311)	7S	10S	S
83	TA4152-77	Rascon 37 / Ae.tauschii (312)	8R	2R	R
84	TA4152-84	Green 3 / Ae.tauschii (458)	8R	10R	R
85	TA4152-62	Scaup / Ae.tauschii (518)	2R	10R	R
86	TA4152-87	Scaup / Ae.tauschii (409)	8R	8R	R
87	TA4152-60	Scoop 1 / Ae.tauschii (358)	7S	10S	S
88	TA4152-78	SCOT / MEXI 1 // Ae.tauschii (314)	10R	9R	R
89	TA4153-11	SKARV 2 / Ae. tauschii (304)	10R	5R	R
90	TA4152-70	SNIPE / YAV79 / DACK / TEAL /3/ Ae.tauschii (700)	8S	6S	S
91	TA4152-72	SNIPE / YAV79 / DACK / TEAL /3/ Ae.tauschii (877)	10MR	10MR	MR
92	TA4152-48	Sora / Ae.tauschii (884)	8R	8R	R
93	TA4153-1	Sora / Ae.tauschii (192)	10R	10R	R
94	TA4153-7	Sora / Ae.tauschii (323)	5S	8S	S
95	TA4152-59	Sterna-DW/ Ae.tauschii (358)	6R	10R	R
96	TA4152-89	STY-US / CELTA // PALS /3/ SRN 5 /4/ Ae.tauschii (502)	10S	10S	S
97	TA4153-9	STY-US / CELTA // PALS /3/ SRN 5 /4/ Ae.tauschii (431)	10S	10S	S
98	TA4152-14	Yarmuk / Ae.tauschii (217)	10R	10R	R
99	TA4152-43	Yarmuk / Ae.tauschii (864)	9S	10S	S
100	TA4152-71	Trinakria / Ae.tauschii (700)	10MR	6S	S
101	TA4152-2	Decoy 1 / Ae.tauschii (188)	8R	9R	R
102	TA4152-32	Decoy 1 / Ae.tauschii (447)	7R	6R	R
103	TA4152-34	Decoy 1/ Ae.tauschii (511)	7S	7MS	S
104	TA4152-36	Decoy 1/ Ae.tauschii (515)	8R	7R	R
105	TA4152-79	Decoy 1 / Ae.tauschii (333)	9R	10R	R
106	TA4152-80	Decoy 1 / Ae.tauschii (428)	10S	10S	S
107	TA4152-83	Decoy 1 / Ae.tauschii (458)	10S	10S	S
108	TA4152-86	Decoy 1 / Ae.tauschii (372)	6S	8S	S
109	TA4152-95	Decoy 1/ Ae.tauschii (1030)	8R	10R	R
110	TA4153-13	Decoy 1/ Ae.tauschii (1027)	10R	10R	R
111	TA4153-33	Decoy 1/ Ae.tauschii (534)	6R	5R	R
112	TA4152-33	YAV 3 / SCO // JO69 / CRA /3/ YAV79 /4/ Ae.tauschii (498)	8MR	10MR	MR
113	SW1	T. durum Langdon/Ae.tauschii CIae1	8R	8R	R
114	SW2	T. durum Langdon/Ae.tauschii CIae5	8R	5R	R
115	SW3	T. durum Langdon/Ae.tauschii CIae9	10S	8S	S
116	SW4	T. durum Langdon/Ae.tauschii CIae11	8S	8S	S
117	SW7	T. durum Langdon/Ae.tauschii CIae22	8R	10R	R
118	SW8	T. durum Langdon/Ae.tauschii CIae25	8R	8R	R
119	SW9	T. durum Langdon/Ae.tauschii CIae26	10S	10S	S
120	SW10	T. durum Langdon/Ae.tauschii H80-101-4	8R	8R	R
121	SW11	T. durum Langdon/Ae.tauschii H80-114-1	6S	8S	S
122	SW12	T. durum Langdon/Ae.tauschii H80-115-3	8S	8S	S
123	SW14	T. durum Langdon/Ae.tauschii PI220641	8R	6R	R
124	SW15	T. durum Langdon/Ae.tauschii PI317392	10R	8R	R
125	SW16	T. durum Langdon/Ae.tauschii RL5003	8R	8R	R
126	SW19	T. durum Langdon/Ae.tauschii RL5259	8R	8R	R
127	SW20	T. durum Langdon/Ae.tauschii RL5261	8R	8R	R
128	SW21	T. durum Langdon/Ae.tauschii RL5263	8R	10R	R
129	SW23	T. durum Langdon/Ae.tauschii RL5271	8S	8S	S
130	SW24	T. durum Langdon/Ae.tauschii RL5272	10S	10S	S
131	SW25	T. durum Langdon/Ae.tauschii RL5286	10S	10S	S
132	SW26	T. durum Langdon/Ae.tauschii RL5392	8R	10R	R
133	SW27	T. durum Langdon/Ae.tauschii RL5393	10S	10S	S
134	SW28	T. durum Langdon/Ae.tauschii RL5492	10S	10S	S
135	SW29	T. durum Langdon/Ae.tauschii RL5498	6S	6S	S
136	SW32	T. durum Langdon/Ae.tauschii RL5532	10R	8R	R
137	SW34	T. durum Langdon/Ae.tauschii RL5544	10S	10S	S
138	SW35	T. durum Langdon/Ae.tauschii RL5552	6R	8R	R
139	SW37	T. durum Langdon/Ae.tauschii RL5557	7R	8R	R
140	SW38	T. durum Langdon/Ae.tauschii RL5560	7S	8S	S
141	SW39	T. durum Langdon/Ae.tauschii RL5561	8S	8S	S
142	SW40	T. durum Langdon/Ae.tauschii RL5562	7S	7S	S
143	SW41	T. durum Langdon/Ae.tauschii RL5570	7R	10R	R
144	SW44	T. durum Langdon/Ae.tauschii PI476874	5R	8R	R
145	SW53	T. durum Langdon/Ae.tauschii PI268210	10R	10R	R
146	SW55	T. durum Langdon/Ae.tauschii RL5257	5R	7R	R
147	SW57	T. durum Langdon/Ae.tauschii RL5270	8R	8R	R
148	SW57-1	T. durum Langdon/Ae.tauschii RL5270	8S	8S	S
149	SW58	T. durum Langdon/Ae.tauschii AL8/78	6S	10S	S
150	SW59	T. durum Langdon/Ae.tauschii CIae19	5R	10R	R
151	SW61	T. durum Langdon/Ae.tauschii TA 1645	1R	3R	R
152	SW62	T. durum Langdon/Ae.tauschii TA 2377	4S	7S	S
153	SW63	T. durum Langdon/Ae.tauschii TA 2450	4S	4S	S
154	SW65	T. durum Langdon/Ae.tauschii CIae 27	10R	10R	R
155	SW70	T. durum Rusty/Ae.tauschii CIae 17	10R	10R	R
156	SW78	T. durum 47-1/Ae.tauschii CIae 24	5R	9R	R
157	TA4154-1	Croc 1	10S	10S	S
158	TA4154-2	Arlin 1	10S	10S	S
159	TA4154-3	ROK / KML	10S	10S	S
160	TA4154-4	Altar 84	10S	10S	S
161	TA4154-5	Dverd 2	10S	10S	S
162	TA4154-7	68.111 / RGB-U // WARD RESEL /3/ STIL	10S	10S	S
163	TA4154-8	68.111 / RGB-U // WARD	10S	10S	S
164	TA4154-9	68.111 / RGB-U // WARD /3/ FGO /4/ RABI	10S	10S	S
165	TA4154-11	CPI / GEDIZ /3/ GOO // JO / CPA	10S	10S	S
166	TA4154-12	D67.2 / P66.270	10S	10S	S
167	TA4154-13	Cerceta	10S	10S	S
168	TA4154-14	Sterna-DW	10S	10S	S
169	TA4154-16	Sora	10S	10S	S
170	TA4154-17	Scaup	10S	10S	S
171	TA4154-18	SNIPE / YAV 79 // DAC / TEAL	10S	10S	S
172	TA4154-19	TK SN1081	10S	10S	S
173	TA4154-20	YAV 2 / TEZ	10S	10S	S
174	TA4154-21	Yarmuk	10S	10S	S
175	TA4154-22	Decoy 1	10S	10S	S
176	TA4154-23	GARZA / BOY	10S	10S	S
177	TA4154-26	Gan	10S	10S	S
178	TA4154-27	Scoop 1	10S	10S	S
179	TA4154-28	STY-US / CELTA // PALS /3/ SRN 5	10S	10S	S
180	TA4154-30	YAV 3 / SCOT // JO69 / CRA /3/ YAV 79	10S	10S	S
181	TA4154-31	Yar	10S	10S	S
182	TA4154-32	68112 / WARD	10S	10S	S
183	TA4154-35	Botno	10S	10S	S
184	TA4154-37	LCK59.61	10S	10S	S
185	TA4154-38	Trinakria	10S	10S	S
186	TA4154-39	Rascon 37	10S	10S	S
187	TA4154-42	SCOT / MEXI 1	10S	10S	S
188	TA4154-43	Falcin 1	10S	10S	S
189	TA4154-44	Green 3	10S	10S	S
aTA numbers refer to the accessions at the Wheat Genetics Resource Center (WGRC) at Kansas State University (Manhattan, KS, USA). Within this collection, TA4152 and TA4153 represent two sets of elite SHW line (Elite 1 and Elite 2, respectively) originally developed at the International Maize and Wheat Improvement Center (CIMMYT), Mexico. TA4154 denotes the durum wheat parents of CIMMYT SHW lines.…

## Sheet: Table S2
Table S2. The GBS dataset based on Wheat Chinese Spring IWGSC RefSeq v2.1 genome
rs#	Alleles	Chr	Pos	Strand	TA4153-11	TA4153-12	TA4153-7	TA4153-8	TA4153-9	TA4153-10	TA4153-3	TA4153-4	TA4153-5	TA4153-6	TA4153-13	TA4153-14	TA4153-19	TA4153-20	TA4153-21	TA4153-22	TA4153-15	TA4153-16	TA4153-17	TA4153-18	TA4153-23	TA4153-24	TA4153-30	TA4153-31	TA4153-32	TA4153-26	TA4153-27	TA4153-28	TA4153-29	TA4153-33	SW1	SW2	TA4152-1	SW3	TA4152-2	TA4152-7	SW9	TA4152-8	SW10	TA4152-9	SW4	TA4152-3	TA4152-4	TA4152-5	SW7
S1A_1160339	A/T	1A	1160339	+	A	A	A	A	A	A	A	A	A	A	A	A	A	A	W	A	A	A	A	A	A	A	A	A	A	A	W	A	A	A	A	A	W	A	A	A	A	A	A	W	A	A	A	A	A
S1A_1230809	G/A	1A	1230809	+	A	G	A	G	G	G	A	A	A	G	A	A	A	A	A	A	A	A	G	A	A	G	G	G	G	A	A	G	A	A	G	G	A	G	A	A	G	A	G	A	G	A	G	G	G
S1A_1235919	A/G	1A	1235919	+	A	A	G	A	A	A	G	G	G	R	G	G	G	G	G	G	G	G	A	G	G	A	A	A	A	G	G	A	G	G	A	A	G	A	A	G	A	G	A	G	A	G	A	A	A
S1A_1719896	C/T	1A	1719896	+	T	C	C	C	C	C	T	C	C	C	C	Y	T	T	C	C	T	C	T	C	C	C	T	T	C	C	T	C	C	T	C	T	C	C	C	C	C	C	C	T	C	T	C	T	C
S1A_1719897	C/A	1A	1719897	+	A	C	C	C	C	C	A	C	C	C	C	M	A	A	C	C	A	C	A	C	C	C	A	A	C	C	A	C	C	A	C	A	C	C	C	C	C	C	C	A	C	A	C	A	C
S1A_1719899	C/T	1A	1719899	+	T	C	C	C	C	C	T	C	C	C	C	Y	T	T	C	C	T	C	T	C	C	C	T	T	C	C	T	C	C	T	C	T	C	C	C	C	C	C	C	T	C	T	C	T	C
S1A_1719918	C/G	1A	1719918	+	G	C	C	C	C	C	G	C	C	C	C	S	G	G	C	C	G	C	G	C	C	C	G	G	C	C	G	C	C	G	C	G	C	C	C	C	C	C	C	G	C	G	C	G	C
S1A_1769289	C/G	1A	1769289	+	C	C	S	C	S	C	C	C	S	C	C	C	C	C	C	C	C	S	C	C	G	C	C	C	C	C	C	C	C	S	C	C	C	C	C	C	C	S	S	C	C	C	C	C	C
S1A_1769290	C/G	1A	1769290	+	C	C	C	C	C	C	S	S	C	C	C	C	C	C	C	C	C	C	C	C	C	C	S	C	C	C	C	C	C	C	C	C	C	C	C	C	S	C	C	C	C	C	C	C	C
S1A_1868794	T/G	1A	1868794	+	T	K	T	T	K	T	T	T	T	T	T	T	T	K	T	T	T	T	T	T	T	T	T	T	T	T	T	T	T	T	K	T	T	T	T	T	T	T	T	T	T	T	K	T	T
S1A_2045892	G/T	1A	2045892	+	G	G	G	G	G	G	G	G	G	G	G	G	G	G	T	T	G	K	G	G	G	G	G	G	G	K	G	G	G	G	T	G	G	G	G	K	G	G	T	G	G	G	G	G	G
S1A_2756143	C/G	1A	2756143	+	C	C	C	C	C	C	C	C	C	C	C	C	S	C	C	C	C	S	C	C	C	C	C	C	C	C	G	C	C	C	C	C	C	C	C	S	C	C	S	C	C	C	C	C	C
S1A_3105963	C/T	1A	3105963	+	T	C	C	C	C	C	T	C	Y	C	C	C	C	C	C	C	Y	C	T	C	C	C	C	Y	C	C	C	C	C	C	C	C	C	C	C	C	C	C	C	T	C	T	C	T	C
S1A_3105964	G/C	1A	3105964	+	C	G	G	G	G	G	C	G	S	G	G	G	G	G	G	G	S	G	C	G	G	G	G	S	G	G	G	G	G	G	G	G	G	G	G	G	G	G	G	C	G	C	G	C	G
S1A_3213186	C/T	1A	3213186	+	C	C	C	C	C	C	C	C	C	C	C	C	Y	Y	C	C	C	C	C	C	C	C	C	C	C	C	Y	C	C	C	T	C	C	C	C	Y	C	C	Y	C	C	C	C	C	C
S1A_3561224	C/T	1A	3561224	+	C	C	C	C	C	C	C	C	T	C	C	C	C	C	C	C	C	C	C	C	C	C	C	C	C	C	C	C	C	C	C	C	C	C	C	C	C	C	C	C	C	C	C	C	C
S1A_3561231	T/G	1A	3561231	+	T	T	T	T	T	T	K	T	T	T	T	T	T	G	T	T	T	T	G	T	T	T	K	K	K	T	T	K	T	T	T	T	T	T	T	T	T	T	T	T	T	T	T	K	T
S1A_4542980	C/T	1A	4542980	+	C	C	Y	C	C	C	C	C	C	C	C	C	Y	C	C	Y	C	C	C	C	C	C	Y	C	C	C	C	C	C	C	C	C	C	C	C	C	C	C	C	C	C	C	Y	C	C
S1A_4604328	A/G	1A	4604328	+	A	A	A	R	R	G	A	A	A	A	A	R	R	A	G	G	A	A	A	A	A	G	R	A	A	A	A	A	A	A	A	A	A	R	A	A	A	A	A	A	G	A	A	A	A
S1A_5190325	A/G	1A	5190325	+	A	G	A	G	G	G	A	A	A	A	A	A	A	A	A	A	A	A	A	A	A	A	A	A	A	A	A	A	A	A	A	A	A	A	A	A	A	A	A	A	A	A	G	A	A
S1A_5190358	C/T	1A	5190358	+	C	C	C	T	C	C	C	C	C	C	C	C	C	C	C	C	C	C	C	C	C	C	C	C	C	C	C	C	C	C	C	C	C	C	C	C	C	C	C	C	C	C	C	C	C
S1A_5198010	G/A	1A	5198010	+	G	A	G	G	A	A	G	G	G	G	G	G	G	G	G	G	G	G	G	G	G	G	G	G	G	G	G	G	G	G	G	G	G	G	G	G	G	G	G	G	G	G	A	G	G
S1A_5857413	C/G	1A	5857413	+	G	C	G	C	C	C	G	G	G	C	G	C	C	C	C	C	C	C	S	C	C	G	C	C	C	C	C	G	C	G	C	C	G	C	G	G	C	G	C	G	C	G	G	G	C
S1A_7528924	T/C	1A	7528924	+	T	C	Y	T	C	T	Y	Y	C	C	C	T	T	T	T	T	T	T	Y	T	T	C	T	T	T	T	T	Y	T	Y	T	T	Y	T	T	C	T	C	T	C	T	Y	C	Y	T
S1A_7612015	T/A	1A	7612015	+	T	T	T	A	T	T	T	T	T	T	T	T	T	T	T	T	T	T	T	T	T	T	T	T	T	T	T	T	T	T	T	T	T	T	T	T	T	T	T	T	T	T	T	T	T
S1A_8561584	A/G	1A	8561584	+	A	G	A	G	G	G	A	A	A	G	A	A	A	A	A	A	A	A	A	A	A	A	A	A	A	A	A	A	A	A	A	A	A	A	A	A	A	A	A	A	A	A	G	A	A
S1A_8619460	A/G	1A	8619460	+	A	G	A	G	A	G	A	A	A	G	A	A	A	A	A	A	A	A	A	A	A	A	A	A	A	A	A	A	A	A	A	A	A	A	A	A	A	A	A	A	A	A	A	A	A
S1A_8635030	T/C	1A	8635030	+	T	T	T	T	T	T	T	T	T	T	T	T	T	T	T	T	T	Y	T	T	Y	T	T	T	T	T	T	T	T	T	Y	T	T	T	T	T	T	T	T	T	T	T	T	T	T
S1A_8635059	A/G	1A	8635059	+	A	G	A	G	G	G	A	A	A	A	A	A	A	A	A	A	A	A	A	A	A	A	A	A	A	A	A	A	A	A	A	A	A	A	A	A	A	A	A	A	A	A	A	A	A
S1A_8997890	A/G	1A	8997890	+	A	A	A	A	A	A	A	A	A	A	A	A	A	A	A	A	A	A	A	A	A	A	A	A	A	A	A	A	A	A	A	A	A	A	A	A	A	G	A	A	A	A	A	A	A
S1A_9349371	C/T	1A	9349371	+	C	C	C	C	C	C	C	C	C	Y	C	C	C	C	Y	Y	C	C	Y	C	C	C	C	C	C	C	C	C	C	C	C	C	Y	C	C	C	C	C	C	T	C	Y	T	Y	C
S1A_9634576	T/C	1A	9634576	+	C	T	T	T	T	T	T	T	T	Y	T	T	T	T	T	T	T	T	C	T	T	T	T	T	T	T	T	T	T	T	T	T	C	T	T	C	T	T	T	C	T	C	C	C	T
S1A_10606173	C/A	1A	10606173	+	A	C	C	C	C	C	C	C	C	C	C	C	C	C	C	C	C	C	C	C	C	C	C	C	C	C	C	C	C	C	C	C	A	C	C	A	C	C	C	A	C	A	C	C	C
S1A_10606176	A/G	1A	10606176	+	G	A	A	A	A	A	A	A	A	A	A	A	A	A	A	A	A	A	A	A	A	A	A	A	A	A	A	A	A	A	A	A	G	A	A	G	A	A	A	G	A	G	A	A	A
S1A_10606184	C/G	1A	10606184	+	G	C	C	C	C	C	C	C	C	C	C	C	C	C	C	C	C	C	C	C	C	C	C	C	C	C	C	C	C	C	C	C	G	C	C	G	C	C	C	G	C	G	C	C	C
S1A_10606210	G/A	1A	10606210	+	A	G	G	G	G	G	G	G	G	G	G	G	G	G	G	G	G	G	G	G	G	G	G	G	G	G	G	G	G	G	G	G	A	G	G	A	G	G	G	A	G	A	G	G	G
S1A_10606238	A/T	1A	10606238	+	A	A	A	A	A	A	A	A	A	A	A	A	A	A	A	A	A	A	A	A	A	A	A	A	A	A	A	A	A	A	A	A	T	A	A	T	A	A	A	T	A	T	A	A	A
S1A_10606253	A/T	1A	10606253	+	A	A	A	A	T	A	A	A	A	A	A	A	A	A	W	W	W	A	A	A	A	A	A	A	A	W	A	A	A	A	A	A	A	W	A	A	A	A	A	A	W	A	A	A	A
S1A_10606275	A/C	1A	10606275	+	A	A	A	A	C	A	A	A	A	A	A	A	A	A	M	M	M	A	A	A	A	A	A	A	A	M	A	A	A	A	A	A	A	M	A	A	A	A	A	A	M	A	A	A	A
S1A_10710979	G/C	1A	10710979	+	C	S	S	S	S	G	G	S	G	G	S	G	G	S	G	G	S	G	G	G	G	G	G	G	S	G	G	S	G	S	G	G	G	S	G	G	G	G	G	C	G	C	G	C	G
S1A_10722829	G/A	1A	10722829	+	G	G	G	G	G	G	G	G	G	G	G	G	G	G	G	G	G	G	G	G	G	G	G	G	G	G	G	G	G	G	G	G	G	G	G	G	G	R	G	G	G	G	G	G	A
S1A_11144792	T/G	1A	11144792	+	T	K	G	T	T	T	T	K	T	T	K	T	T	K	T	T	T	T	T	G	T	T	T	T	K	T	T	K	K	T	T	T	T	T	T	T	T	T	T	T	T	T	T	T	K
S1A_11144797	A/C	1A	11144797	+	A	M	C	A	A	A	A	M	A	A	M	A	A	M	A	A	A	A	A	C	A	A	A	A	M	A	A	M	M	A	A	A	A	A	A	A	A	A	A	A	A	A	A	A	M
S1A_11189470	A/G	1A	11189470	+	A	A	A	A	A	R	A	A	G	A	A	G	A	A	A	A	A	A	A	A	A	A	R	A	A	A	A	A	A	A	A	A	A	A	A	A	A	A	A	A	A	A	A	A	A
S1A_11189508	G/A	1A	11189508	+	G	G	G	G	G	R	G	G	A	G	G	A	G	G	G	G	G	G	G	G	G	G	R	G	G	G	G	G	G	G	G	G	G	G	G	G	G	G	G	G	G	G	G	G	G
S1A_11326404	A/G	1A	11326404	+	A	R	A	A	A	A	A	A	A	A	A	A	R	A	A	A	A	R	A	A	A	A	A	A	A	A	R	A	A	A	R	R	A	A	A	R	A	A	A	A	A	A	A	A	A
S1A_11338370	T/C	1A	11338370	+	T	C	T	C	C	C	T	T	T	T	T	T	T	T	T	T	T	T	C	T	T	T	T	T	T	T	T	T	T	T	T	T	C	T	C	C	T	T	T	C	T	C	T	C	T
S1A_11342927	C/T	1A	11342927	+	C	C	C	C	C	C	C	C	C	C	C	C	C	C	C	C	C	C	T	C	C	C	C	C	C	C	C	C	C	C	C	C	C	C	C	C	C	C	C	C	C	C	T	T	C
S1A_11504768	C/G	1A	11504768	+	C	C	C	C	C	C	C	C	C	C	C	C	S	C	C	C	C	C	C	C	C	C	C	C	C	C	S	C	C	C	S	S	C	C	C	G	C	C	S	C	C	C	C	C	C
S1A_11790419	A/C	1A	11790419	+	A	M	A	A	A	A	A	M	A	A	M	A	A	A	A	M	A	A	A	A	A	M	A	A	A	A	A	M	A	A	M	M	A	A	A	C	A	A	M	A	A	A	A	A	C
S1A_11790449	A/G	1A	11790449	+	A	R	A	A	A	A	A	R	A	A	R	A	A	A	A	R	A	A	A	A	A	R	A	A	A	A	A	R	A	A	R	R	A	A	A	G	A	A	R	A	A	A	A	A	G
S1A_12064190	T/C	1A	12064190	+	T	Y	C	T	Y	T	T	T	T	T	T	T	T	T	T	T	Y	T	T	T	Y	T	C	T	T	Y	T	T	Y	T	T	T	T	T	T	T	Y	T	T	T	T	T	T	T	T
S1A_12064229	G/A	1A	12064229	+	G	R	A	G	R	G	G	G	G	G	G	G	G	G	G	G	R	G	G	G	R	G	A	G	G	R	G	G	R	G	G	G	G	G	G	G	R	G	G	G	G	G	G	G	G
S1A_12952948	T/C	1A	12952948	+	T	T	C	T	T	T	C	C	C	T	C	T	T	T	T	T	T	T	C	T	T	T	T	T	T	T	T	T	T	C	T	T	T	T	C	T	T	C	T	T	T	T	T	C	T
S1A_13750704	A/C	1A	13750704	+	A	A	A	C	A	A	A	A	A	C	A	A	A	A	A	A	A	A	A	A	A	A	C	C	C	A	A	A	A	A	A	A	C	A	A	C	A	A	A	C	A	C	A	A	A
S1A_13750706	C/A	1A	13750706	+	A	C	C	A	C	C	C	C	C	A	C	C	C	C	C	C	C	C	C	C	C	C	A	A	A	C	C	C	C	C	C	C	A	C	C	A	C	C	C	A	C	A	C	C	C
S1A_13808759	A/G	1A	13808759	+	A	A	A	A	A	A	A	A	A	A	A	A	A	A	A	A	A	A	G	A	A	A	A	A	A	A	A	A	A	A	A	A	A	A	A	A	A	A	A	A	A	A	G	G	A
S1A_13942281	T/C	1A	13942281	+	T	T	T	T	T	T	T	T	T	T	T	T	T	T	T	T	T	T	T	T	T	T	T	T	T	T	T	T	T	T	T	T	T	T	T	T	T	T	T	T	T	T	T	T	T
S1A_14004998	A/G	1A	14004998	+	G	A	G	A	A	A	G	G	G	A	G	A	A	A	A	A	A	A	A	A	A	A	A	A	A	A	A	A	A	G	A	A	A	A	G	A	A	G	A	A	A	A	A	A	A
S1A_14289870	T/C	1A	14289870	+	C	T	T	T	T	T	T	T	T	T	T	T	T	T	T	T	T	T	T	T	T	T	C	C	C	T	T	T	T	T	T	T	C	T	T	C	T	T	T	C	T	C	C	T	T
S1A_14684652	A/T	1A	14684652	+	A	A	A	A	A	A	A	A	A	A	A	A	A	A	A	A	A	T	A	A	A	A	A	A	A	A	A	A	A	A	A	T	A	A	A	T	A	A	T	A	A	A	T	A	A
S1A_15398337	C/A	1A	15398337	+	C	C	C	M	M	C	M	C	M	C	C	A	C	C	C	C	C	C	C	C	C	C	M	M	C	C	C	C	C	C	C	C	C	M	C	C	C	C	C	C	M	C	C	C	C
S1A_16055502	G/A	1A	16055502	+	G	A	G	G	A	A	G	G	G	R	G	G	G	G	G	G	G	G	A	G	G	G	G	G	G	G	G	G	G	G	G	G	G	G	G	G	G	G	G	G	G	G	A	A	G
S1A_16055527	A/G	1A	16055527	+	A	G	A	A	G	G	A	A	A	R	A	A	A	A	A	A	A	A	G	A	A	A	A	A	A	A	A	A	A	A	A	A	A	A	A	A	A	A	A	A	A	A	G	G	A
S1A_16055601	T/G	1A	16055601	+	T	G	T	T	G	T	T	T	T	K	T	T	T	T	T	T	T	T	G	T	T	T	T	T	T	T	T	T	T	T	T	T	T	T	T	T	T	T	T	T	T	T	G	G	T
S1A_22372302	G/A	1A	22372302	+	G	G	R	G	G	G	G	G	G	R	R	G	G	G	G	G	G	G	G	G	G	G	G	G	G	G	G	A	A	G	G	G	G	G	R	G	G	G	G	G	G	G	G	G	G
S1A_22816033	C/T	1A	22816033	+	C	C	C	C	C	C	Y	Y	C	C	Y	C	C	C	C	C	C	C	C	C	C	C	C	C	Y	C	Y	C	C	Y	C	C	C	C	C	C	C	Y	C	C	C	C	Y	C	C
S1A_23419578	A/G	1A	23419578	+	R	A	A	R	G	A	R	A	A	A	A	A	A	A	A	A	R	A	R	A	A	A	A	R	A	A	A	A	A	R	A	A	A	A	G	A	A	A	A	A	R	R	A	A	A
S1A_23419581	A/T	1A	23419581	+	A	T	A	A	A	A	A	A	A	A	A	A	T	T	A	A	A	W	A	A	A	A	A	A	A	A	W	A	A	A	W	A	A	A	A	W	A	A	W	A	A	A	T	A	A
S1A_23419603	C/G	1A	23419603	+	C	C	C	C	C	C	C	C	C	C	C	G	C	C	S	S	C	C	C	S	S	C	C	C	C	C	C	C	S	C	C	C	C	S	C	C	S	C	C	C	C	C	C	G	C
S1A_24267117	C/T	1A	24267117	+	C	C	C	C	Y	C	C	C	C	Y	C	C	C	C	C	C	C	C	Y	C	C	C	C	C	C	C	C	C	C	C	C	C	C	C	C	C	C	C	C	C	C	C	T	C	C
S1A_24474597	C/G	1A	24474597	+	C	C	C	S	C	S	C	C	C	C	C	S	G	C	C	C	S	C	C	C	C	C	C	C	C	C	C	C	C	C	C	C	C	C	C	C	C	C	C	C	C	C	C	C	C
S1A_24521628	C/T	1A	24521628	+	C	C	C	C	C	C	C	C	C	C	C	C	C	C	C	C	T	C	C	C	Y	C	C	C	C	Y	C	C	C	C	C	C	C	C	C	C	C	C	C	C	C	C	C	C	C
S1A_25074055	A/G	1A	25074055	+	A	A	G	G	A	A	G	G	A	A	A	G	G	G	G	G	G	G	G	G	G	A	A	A	A	G	G	A	G	A	A	A	A	A	A	A	A	A	A	A	A	A	A	G	A
S1A_25087641	A/G	1A	25087641	+	A	A	A	A	R	A	A	A	R	A	A	A	R	A	A	A	A	A	A	A	A	A	A	A	A	A	A	A	A	A	A	A	A	A	A	A	A	A	A	R	R	R	A	A	A
S1A_25099485	A/G	1A	25099485	+	A	A	A	G	A	A	A	A	A	A	A	A	A	A	A	A	A	A	A	A	A	A	A	A	A	G	A	A	A	A	A	A	A	A	A	A	A	A	A	A	A	A	A	A	A
S1A_25360855	G/A	1A	25360855	+	G	G	G	G	G	G	G	G	G	G	G	G	G	G	G	G	G	G	G	G	G	G	R	G	G	R	G	G	G	A	G	G	G	G	G	G	G	G	G	G	G	G	G	A	G
S1A_25369754	T/C	1A	25369754	+	T	T	T	T	T	T	T	T	T	T	T	T	T	T	T	T	T	Y	Y	T	T	T	T	T	T	T	Y	T	T	T	Y	C	Y	T	Y	Y	T	T	Y	T	T	T	T	T	T
S1A_25369757	C/G	1A	25369757	+	C	C	C	C	C	C	C	C	C	C	C	C	C	C	C	C	C	S	S	C	C	C	C	C	C	C	S	C	C	C	S	G	C	C	C	S	C	C	S	C	C	C	C	C	C
S1A_25369772	T/G	1A	25369772	+	T	T	T	T	T	T	T	T	T	T	T	T	T	T	T	T	T	K	K	T	T	T	T	T	T	T	K	T	T	T	K	G	K	T	K	K	T	T	K	T	T	T	T	T	T
S1A_25480629	C/T	1A	25480629	+	C	C	C	C	C	C	C	C	C	C	Y	C	C	C	C	C	C	C	C	C	C	Y	C	C	Y	C	C	Y	C	T	C	C	C	Y	Y	C	C	Y	Y	Y	C	C	C	C	C
S1A_25480641	T/C	1A	25480641	+	T	T	C	C	T	T	T	T	T	T	Y	T	T	T	T	T	T	T	T	T	T	C	T	T	Y	T	T	C	T	C	T	T	T	Y	Y	T	T	Y	Y	Y	Y	T	T	T	T
S1A_25486663	A/C	1A	25486663	+	A	A	A	A	A	A	A	A	M	A	A	A	A	A	A	A	A	A	M	A	A	A	C	A	A	A	A	A	A	A	A	A	A	A	A	A	A	A	M	A	A	A	M	A	A
S1A_25486665	A/T	1A	25486665	+	A	W	A	A	A	A	W	A	A	A	A	W	A	A	A	W	A	A	W	A	A	A	A	A	A	A	A	A	A	A	A	A	A	A	A	A	A	A	A	A	A	A	W	A	W
S1A_25486687	A/T	1A	25486687	+	A	A	A	A	A	A	A	A	A	A	W	W	A	A	A	A	A	A	A	A	A	A	A	A	A	A	A	A	A	A	A	A	A	W	A	A	W	A	W	W	A	A	A	A	A
S1A_27654591	T/C	1A	27654591	+	T	T	T	T	T	T	T	T	T	T	T	T	T	T	T	T	T	Y	T	T	T	T	T	T	T	T	Y	T	T	T	T	Y	T	T	T	Y	T	T	T	T	T	T	Y	T	T
S1A_27654817	C/T	1A	27654817	+	C	C	C	C	C	C	C	C	C	C	C	C	C	C	C	C	C	C	C	C	C	C	C	C	C	C	Y	C	C	C	T	Y	C	C	C	Y	C	C	Y	C	C	C	C	C	C
S1A_27654819	G/A	1A	27654819	+	G	G	G	G	G	G	G	G	G	G	G	G	G	G	G	G	G	G	G	G	G	G	G	G	G	G	R	G	G	G	A	R	G	G	G	R	G	G	R	G	G	G	G	G	G
S1A_27654826	T/A	1A	27654826	+	T	T	T	T	T	T	T	T	T	T	T	T	T	T	T	T	T	T	T	T	T	T	T	T	T	T	W	T	T	T	A	W	T	T	T	W	T	T	W	T	T	T	T	T	T
S1A_27958186	A/G	1A	27958186	+	G	A	A	A	A	A	A	A	A	A	A	A	A	A	A	A	A	A	A	A	A	A	A	A	A	A	A	R	A	G	A	A	A	A	A	A	A	A	A	G	A	G	A	G	A
S1A_28628149	T/A	1A	28628149	+	T	T	T	T	T	T	T	T	T	T	A	T	T	T	T	T	T	T	T	T	T	A	A	A	A	T	T	T	T	A	A	A	T	A	A	T	A	A	A	T	A	T	T	T	A
S1A_28628178	C/G	1A	28628178	+	C	C	C	C	C	C	C	C	C	C	C	C	C	C	C	C	C	S	C	C	C	C	C	C	C	C	S	C	C	C	S	G	C	C	C	S	C	C	S	C	C	C	S	C	C
S1A_28628194	C/T	1A	28628194	+	C	C	C	C	C	C	C	C	C	C	C	C	C	C	C	C	C	Y	C	C	C	C	C	C	C	C	T	C	C	C	Y	T	C	C	C	Y	C	C	Y	C	C	C	Y	C	C
S1A_28628207	T/G	1A	28628207	+	T	T	T	T	T	T	T	T	T	T	T	T	T	T	T	T	T	K	T	T	T	T	T	T	T	T	K	T	T	T	K	G	T	T	T	K	T	T	K	T	T	T	K	T	T
S1A_29677400	G/A	1A	29677400	+	G	R	A	G	G	G	G	G	G	G	G	G	G	G	G	R	G	G	G	R	G	A	G	G	G	G	G	G	G	G	R	G	G	G	G	R	G	G	G	G	G	G	G	G	G
S1A_29677413	A/T	1A	29677413	+	A	W	T	A	A	A	A	A	A	A	A	A	A	A	A	W	A	A	A	W	A	T	A	A	A	A	A	A	A	A	W	A	A	A	A	W	A	A	A	A	A	A	A	A	A
S1A_29677424	C/T	1A	29677424	+	C	C	C	C	C	C	C	Y	C	C	C	C	C	C	C	C	C	C	C	C	C	C	C	C	C	C	C	C	C	C	C	Y	C	C	C	C	C	C	C	C	Y	C	C	C	C
S1A_30457520	C/A	1A	30457520	+	C	C	C	C	C	C	C	C	C	C	C	C	C	C	C	C	C	C	C	C	C	C	C	C	M	C	C	C	C	C	C	C	C	C	C	C	C	C	M	C	C	C	C	C	M
S1A_30457547	G/A	1A	30457547	+	G	G	G	A	G	G	G	G	G	R	R	G	G	G	G	G	G	G	G	G	G	G	R	A	G	R	G	G	G	A	G	G	G	G	G	G	G	G	G	G	G	G	G	G	G
S1A_30457550	G/A	1A	30457550	+	G	G	G	A	G	G	G	G	G	R	R	G	G	G	G	G	G	G	G	G	G	G	R	A	G	R	G	G	G	A	G	G	G	G	G	G	G	G	G	G	G	G	G	G	G
S1A_30457558	T/A	1A	30457558	+	A	T	T	T	T	T	W	A	A	T	W	A	T	T	A	A	T	W	T	T	A	A	T	T	T	W	A	A	A	T	T	T	A	T	A	W	T	A	T	A	T	W	T	A	T
S1A_30801563	C/T	1A	30801563	+	C	Y	C	C	C	Y	C	C	C	C	C	C	C	C	C	C	C	C	C	C	C	C	C	C	C	C	C	C	C	C	T	C	C	Y	C	C	C	C	T	C	T	C	C	C	C
S1A_30801574	G/T	1A	30801574	+	G	K	G	G	G	G	G	G	G	K	G	G	G	G	G	G	G	G	G	G	G	G	G	G	G	G	G	G	G	G	T	G	G	K	G	G	G	G	T	G	T	G	G	G	G
S1A_30857547	G/C	1A	30857547	+	G	G	G	G	G	G	G	G	G	G	G	G	G	G	G	G	G	S	G	G	G	G	G	G	G	G	S	G	G	G	S	S	G	G	G	S	G	G	S	G	G	G	G	G	G
S1A_30857556	C/G	1A	30857556	+	C	C	C	C	C	C	C	C	C	C	C	C	C	C	C	C	C	S	C	C	C	C	C	C	C	C	S	C	C	C	S	S	C	C	C	S	C	C	S	C	C	C	C	C	C
S1A_32266335	T/A	1A	32266335	+	T	A	T	T	T	T	T	T	T	T	T	T	T	T	W	T	T	T	T	W	T	T	T	T	T	T	T	W	T	T	T	T	T	T	T	T	T	T	T	T	T	T	W	T	T
S1A_32266350	A/T	1A	32266350	+	A	A	A	A	A	W	A	A	A	A	A	W	W	A	A	W	A	A	A	A	A	A	A	A	A	A	A	A	W	A	W	A	A	A	A	A	A	A	A	W	A	A	A	A	A
S1A_34023514	C/T	1A	34023514	+	C	C	C	C	C	Y	C	C	C	C	C	C	C	C	Y	Y	C	C	C	C	C	Y	C	C	C	Y	C	C	C	C	C	C	C	C	C	C	C	C	C	C	C	C	C	C	C
S1A_34023523	C/G	1A	34023523	+	C	C	C	C	C	S	C	C	C	C	C	C	C	C	S	S	C	C	C	C	C	S	C	C	C	S	C	C	C	C	C	C	C	C	C	C	C	C	C	C	C	C	C	C	C
S1A_34041462	G/A	1A	34041462	+	G	G	G	G	G	G	G	G	G	G	G	G	G	G	G	G	G	G	G	G	G	G	A	A	A	G	G	G	G	G	G	G	G	G	G	G	G	G	G	G	G	G	G	G	G
S1A_34041465	C/T	1A	34041465	+	C	C	C	C	C	C	C	C	C	Y	C	C	C	C	C	C	C	C	C	C	C	C	T	T	T	C	C	C	C	C	C	C	C	C	C	C	C	C	C	C	C	C	C	C	C
S1A_34105309	G/A	1A	34105309	+	G	G	G	G	G	G	G	G	G	G	G	G	G	G	G	G	G	G	G	G	G	G	A	A	A	G	G	G	G	G	G	G	G	G	G	G	G	G	G	G	G	G	G	G	G
S1A_34244480	T/C	1A	34244480	+	T	T	T	T	T	T	T	T	T	T	T	T	T	T	T	T	T	Y	T	T	T	T	T	T	T	T	C	T	T	T	Y	T	T	T	T	C	T	T	C	T	T	T	T	T	T
S1A_34244492	T/C	1A	34244492	+	T	T	T	T	T	T	T	T	T	T	T	T	T	T	T	T	T	Y	T	T	T	T	T	T	T	T	C	T	T	T	Y	T	T	T	T	C	T	T	C	T	T	T	T	T	T
S1A_34292932	T/C	1A	34292932	+	T	T	T	T	T	T	T	T	T	T	T	T	T	T	T	T	T	T	T	T	T	T	C	C	C	T	T	T	T	T	T	T	T	T	T	T	T	T	T	T	T	T	T	T	T
S1A_34463699	T/C	1A	34463699	+	T	T	T	T	T	T	T	T	T	T	T	T	T	T	T	T	T	T	T	T	T	T	C	C	C	T	T	T	T	T	T	T	T	T	T	T	T	T	T	T	T	T	T	T	T
S1A_34463723	A/G	1A	34463723	+	A	A	A	A	A	A	A	A	A	A	A	A	A	A	A	A	A	A	A	A	A	A	G	G	G	A	A	A	A	A	A	A	A	A	A	A	A	A	A	A	A	A	A	A	A
S1A_34710919	C/G	1A	34710919	+	C	C	C	C	C	C	C	C	C	C	C	S	C	C	C	C	C	C	C	C	C	C	C	C	C	C	C	S	C	C	C	S	C	C	C	S	C	C	C	C	C	C	C	G	C
S1A_34726439	G/C	1A	34726439	+	G	G	G	C	G	G	G	G	G	G	G	G	G	G	S	S	S	G	G	G	G	C	G	G	G	S	G	G	G	G	G	G	G	S	G	G	G	G	G	G	S	G	G	G	G
S1A_35556330	G/C	1A	35556330	+	G	G	G	G	G	G	G	G	G	G	G	G	G	S	S	G	S	G	G	S	G	G	G	G	S	S	S	G	G	S	G	G	G	G	G	G	S	G	G	G	G	G	G	S	S
S1A_38669987	C/T	1A	38669987	+	T	Y	C	C	C	Y	C	C	C	C	C	C	C	C	C	C	C	C	C	C	C	Y	C	C	C	C	C	C	C	C	C	C	T	C	C	Y	C	C	C	C	C	T	C	Y	C
S1A_41446730	C/T	1A	41446730	+	C	C	C	C	C	C	C	C	C	T	C	C	C	C	C	C	C	C	C	C	C	C	T	T	T	C	C	C	C	C	C	C	C	C	C	C	C	C	C	C	C	C	C	C	C
S1A_41769652	G/A	1A	41769652	+	G	G	G	G	G	G	G	G	G	G	R	G	G	G	G	G	G	G	G	G	G	G	G	G	G	G	G	G	G	R	G	G	G	G	A	G	G	A	G	G	G	G	G	G	G
S1A_44733363	T/A	1A	44733363	+	T	T	T	T	T	T	T	T	T	T	T	T	T	W	W	T	T	T	T	T	W	T	W	T	T	T	W	T	T	T	T	T	T	T	T	T	T	T	T	T	W	T	T	T	T
S1A_44825831	T/G	1A	44825831	+	T	T	K	T	T	G	K	T	T	T	T	T	T	T	T	K	T	K	T	T	K	T	G	G	G	K	T	T	G	T	T	T	T	T	T	T	T	T	T	T	T	K	G	T	K
S1A_46954802	A/G	1A	46954802	+	A	A	R	A	A	A	R	A	R	A	R	A	A	A	R	G	A	A	A	A	A	A	A	A	A	A	G	A	A	R	A	A	A	A	R	A	A	R	A	A	A	A	A	A	A
S1A_46954810	T/C	1A	46954810	+	T	T	Y	T	T	T	Y	T	Y	Y	Y	T	T	T	Y	C	T	T	T	T	T	T	T	T	T	T	C	T	T	Y	T	T	T	T	C	T	T	Y	T	T	T	T	T	T	T
S1A_47271293	A/T	1A	47271293	+	A	W	A	A	W	A	A	A	A	A	A	A	A	A	W	T	W	A	A	A	A	A	A	W	T	A	A	A	T	A	A	A	A	A	A	A	A	A	W	A	A	A	A	A	A
S1A_48394909	G/A	1A	48394909	+	R	G	G	G	G	G	G	G	G	G	G	G	G	G	G	R	G	G	G	G	G	G	A	A	A	G	G	G	G	G	G	G	G	G	G	G	G	G	G	R	G	G	G	G	G
S1A_48771381	G/A	1A	48771381	+	G	R	G	G	G	G	G	G	G	G	G	G	G	R	G	G	G	R	G	G	G	G	G	G	G	G	R	G	G	G	R	R	G	G	G	G	G	G	G	G	G	G	R	G	G
S1A_48771427	C/T	1A	48771427	+	C	Y	C	C	C	C	C	C	C	C	C	C	C	Y	C	C	C	C	C	C	C	C	C	C	C	C	Y	C	C	C	Y	Y	C	C	C	Y	C	C	C	C	C	C	C	C	C
S1A_51703056	G/T	1A	51703056	+	G	G	G	G	G	G	G	G	G	T	G	G	G	G	G	G	G	G	G	G	G	G	T	T	T	G	G	G	G	G	G	G	G	G	G	G	G	G	G	G	G	G	T	G	G
S1A_51794952	A/G	1A	51794952	+	A	A	A	A	A	A	A	A	A	G	A	A	A	A	A	A	A	A	A	A	A	A	G	G	G	A	A	A	A	A	A	A	A	A	A	A	A	A	A	A	A	A	A	A	A
S1A_52434548	G/A	1A	52434548	+	G	G	G	G	G	G	G	G	G	G	G	G	G	G	G	G	G	A	G	G	G	G	G	G	G	G	A	G	G	G	A	A	G	G	G	A	G	G	A	G	G	G	G	G	G
S1A_54214341	C/G	1A	54214341	+	C	C	C	C	C	C	C	C	S	S	C	C	G	C	G	C	C	C	C	G	C	C	G	C	C	C	S	C	C	C	C	C	C	C	S	S	C	S	C	C	C	C	C	C	C
S1A_54959867	A/C	1A	54959867	+	A	A	A	A	A	A	A	A	A	C	A	A	A	A	A	A	A	A	A	A	A	A	C	C	C	A	A	A	A	A	A	A	A	A	A	A	A	A	A	A	A	A	C	A	A
S1A_55956171	T/A	1A	55956171	+	T	T	T	T	T	T	T	T	T	T	T	T	T	T	T	T	T	T	T	T	T	T	A	A	A	T	T	T	T	T	T	T	T	T	T	T	T	T	T	T	T	T	A	T	T
S1A_56361583	A/G	1A	56361583	+	A	A	A	A	A	A	A	A	A	A	A	A	A	A	A	A	A	R	A	A	A	A	A	A	A	A	R	A	A	A	R	R	A	A	A	R	A	A	R	A	A	A	A	A	A
S1A_62066403	T/C	1A	62066403	+	T	T	T	T	T	T	T	T	T	T	T	T	T	T	T	T	T	Y	T	Y	T	T	T	T	T	T	T	T	T	T	T	T	T	T	T	T	T	T	T	T	T	T	Y	T	T
S1A_62066404	C/T	1A	62066404	+	C	C	C	C	C	C	C	C	C	C	C	C	C	C	C	C	C	Y	C	Y	C	C	C	C	C	C	C	C	C	C	C	C	C	C	C	C	C	C	C	C	C	C	Y	C	C
S1A_62066405	A/C	1A	62066405	+	A	A	A	A	A	A	A	A	A	A	A	A	A	A	A	A	A	M	A	M	A	A	A	A	A	A	A	A	A	A	A	A	A	A	A	A	A	A	A	A	A	A	M	A	A
S1A_62327587	A/G	1A	62327587	+	A	A	A	A	A	A	A	A	A	A	A	A	R	A	R	R	A	A	A	A	A	A	A	A	A	A	A	A	A	A	A	A	A	A	A	A	A	A	A	A	A	A	R	A	A
S1A_62401141	G/T	1A	62401141	+	G	G	G	G	G	G	G	G	G	G	G	G	G	G	G	G	G	K	G	G	G	G	G	G	G	G	T	G	G	G	K	K	G	G	G	K	G	G	T	G	G	G	G	G	G
S1A_63553131	C/T	1A	63553131	+	C	C	C	C	T	T	C	Y	C	C	C	Y	C	C	C	C	Y	C	Y	C	C	C	T	Y	Y	C	C	Y	Y	C	C	C	C	T	C	C	C	C	C	C	T	C	C	C	T
S1A_63553149	G/A	1A	63553149	+	G	G	G	G	G	G	G	R	G	G	G	G	G	G	G	G	G	G	G	G	G	G	G	G	R	G	G	R	R	G	G	G	G	G	G	G	G	G	G	G	G	G	G	G	A
S1A_66184874	G/A	1A	66184874	+	A	G	G	G	G	G	G	G	G	G	G	G	G	G	G	G	G	G	G	G	G	G	G	G	G	G	G	G	G	G	G	G	R	G	G	R	G	G	G	R	G	R	A	G	G
S1A_66187414	G/T	1A	66187414	+	G	G	G	K	G	G	G	G	G	G	G	G	K	K	G	G	G	G	G	G	G	G	G	G	G	G	G	G	G	G	G	G	G	G	G	G	G	G	K	G	G	G	G	G	K
S1A_66187450	T/C	1A	66187450	+	T	T	T	Y	T	Y	T	T	T	Y	T	T	Y	Y	T	T	T	T	T	T	T	T	T	T	T	T	T	T	T	T	T	T	T	Y	T	T	Y	T	Y	T	T	T	T	T	Y
S1A_67267098	G/A	1A	67267098	+	G	R	G	G	G	G	R	G	G	R	G	G	G	G	G	G	G	G	G	G	G	G	G	G	G	G	G	G	G	G	G	R	R	G	G	G	G	G	G	G	G	G	R	R	G
S1A_67267110	C/G	1A	67267110	+	C	S	C	C	C	C	S	C	C	S	C	C	C	C	C	C	C	C	C	C	C	C	C	C	C	C	C	C	C	C	C	S	S	C	C	C	C	C	C	C	C	C	S	S	C
S1A_67267132	G/C	1A	67267132	+	G	S	G	G	G	G	S	G	G	S	G	G	G	G	G	G	G	G	G	G	G	G	G	G	G	G	G	G	G	G	G	S	S	G	G	G	G	G	G	G	G	G	S	S	G
S1A_69540403	T/A	1A	69540403	+	T	W	T	W	T	T	T	W	T	T	T	T	T	T	W	T	T	T	T	T	T	T	T	T	W	T	W	T	T	T	T	T	T	T	T	W	T	T	T	T	T	T	T	T	T
S1A_76940960	G/A	1A	76940960	+	A	G	A	G	G	G	G	G	G	G	G	G	G	G	A	A	G	R	G	R	A	R	R	G	G	G	G	G	G	G	G	G	A	G	G	A	G	G	G	A	R	A	G	R	G
S1A_76940974	A/T	1A	76940974	+	T	A	T	A	A	A	A	A	A	A	A	A	A	A	A	A	A	W	A	W	T	W	W	A	A	A	A	A	A	A	A	A	T	A	A	T	A	A	A	T	W	T	A	W	A
S1A_76941002	C/G	1A	76941002	+	G	C	G	C	C	C	C	C	C	C	C	C	C	C	C	C	C	S	C	S	G	S	S	C	C	C	C	C	C	C	C	C	G	C	C	G	C	C	C	G	S	G	C	S	C
S1A_81216365	A/G	1A	81216365	+	A	A	A	A	A	A	R	A	A	R	A	A	A	A	R	R	A	A	R	A	A	A	R	A	A	R	A	A	A	A	A	A	A	A	R	A	A	G	A	A	A	A	A	A	A
S1A_81216369	A/G	1A	81216369	+	G	A	A	A	R	R	R	A	A	A	A	R	A	A	A	R	R	A	A	G	A	R	A	R	A	R	A	A	A	R	A	A	A	G	A	A	R	A	A	R	A	G	R	G	A
S1A_81307481	G/C	1A	81307481	+	G	G	G	G	G	G	G	G	G	G	G	G	G	G	G	G	G	G	G	S	S	G	G	G	G	G	G	G	S	G	G	G	G	G	G	G	S	G	G	G	G	G	G	G	G
S1A_81453067	G/A	1A	81453067	+	G	G	G	G	G	G	G	A	G	G	G	G	G	G	G	G	G	G	G	G	G	G	G	G	R	G	G	G	R	G	G	G	G	G	G	G	G	G	G	G	G	G	G	G	G
S1A_81453077	C/T	1A	81453077	+	C	C	C	C	C	C	C	T	C	C	C	C	C	C	C	C	C	C	C	C	C	C	C	C	Y	C	C	C	Y	C	C	C	C	C	C	C	C	C	C	C	C	C	C	C	C
S1A_83002926	T/G	1A	83002926	+	T	T	T	T	T	T	T	T	T	T	T	T	T	T	T	T	T	T	T	T	T	T	T	T	T	T	K	T	T	T	G	K	T	T	T	T	T	T	K	T	T	T	T	T	T
S1A_83002989	C/T	1A	83002989	+	C	C	C	C	C	C	C	C	C	C	C	C	C	C	C	C	C	Y	C	C	C	C	C	C	C	C	Y	C	C	C	Y	Y	C	C	C	Y	C	C	Y	C	C	C	C	C	C
S1A_90622540	T/A	1A	90622540	+	T	T	T	T	T	T	T	T	T	T	T	T	T	T	T	T	T	W	T	T	T	T	T	T	T	T	W	T	T	T	W	W	T	T	T	W	T	T	T	T	T	T	T	T	T
S1A_93025063	T/A	1A	93025063	+	T	T	T	T	W	T	W	T	T	T	T	T	T	T	T	T	T	T	W	W	W	T	T	T	T	T	T	T	T	W	T	T	T	T	T	T	T	T	T	T	T	T	T	T	T
S1A_93025083	C/T	1A	93025083	+	C	C	C	C	Y	C	Y	C	C	Y	C	C	C	T	Y	C	C	C	Y	Y	Y	C	C	C	C	C	C	C	Y	Y	C	C	C	C	C	C	C	C	C	C	C	C	C	C	C
S1A_93376276	T/C	1A	93376276	+	Y	T	T	Y	T	T	T	T	T	T	T	T	Y	Y	T	Y	T	T	T	T	T	T	T	T	T	T	T	T	T	T	Y	T	T	Y	T	T	Y	T	Y	T	T	T	T	T	T
S1A_97008200	C/A	1A	97008200	+	C	C	C	C	A	C	C	C	C	C	C	C	C	C	M	C	C	C	C	C	C	M	C	C	M	C	C	C	C	C	C	A	C	C	C	C	C	C	C	C	C	C	C	C	C
S1A_97008218	A/C	1A	97008218	+	A	A	A	A	A	A	A	A	A	A	A	A	A	A	A	A	A	A	A	M	A	A	A	M	A	A	A	M	A	A	A	A	A	A	A	A	A	A	A	A	A	A	M	C	A
S1A_97008228	C/T	1A	97008228	+	C	Y	C	C	C	C	C	C	C	C	C	C	C	C	C	C	C	C	Y	C	C	Y	T	C	C	C	C	C	C	C	Y	C	C	C	C	C	C	C	C	C	T	C	Y	C	C
S1A_97008235	C/T	1A	97008235	+	C	C	C	C	C	C	C	C	C	C	Y	C	Y	C	C	C	C	C	C	Y	C	C	C	C	C	C	Y	Y	C	C	C	C	C	C	C	C	Y	C	C	C	C	C	C	C	Y
S1A_97027567	G/A	1A	97027567	+	G	A	G	G	G	G	G	G	G	G	R	R	G	G	G	G	G	G	G	G	G	A	G	G	G	G	G	R	G	G	G	R	G	G	R	G	G	G	G	G	G	G	G	G	G
S1A_97027576	T/A	1A	97027576	+	T	T	T	T	T	T	W	T	T	W	T	T	T	T	T	T	T	T	T	W	T	T	T	T	T	T	T	T	T	W	T	T	W	T	T	T	T	T	T	T	T	T	T	T	T
S1A_97027578	T/G	1A	97027578	+	T	T	T	T	G	T	T	T	T	T	T	K	T	T	K	T	K	T	T	K	T	T	T	G	T	T	T	T	T	T	T	T	T	K	T	T	T	T	T	T	T	T	T	T	T
S1A_97027594	G/A	1A	97027594	+	G	G	G	G	G	R	G	G	G	R	G	G	G	R	G	G	G	G	G	G	G	G	G	G	G	G	G	G	G	R	G	G	G	G	G	G	G	G	G	G	G	G	R	G	G
S1A_97027597	T/A	1A	97027597	+	T	T	W	A	T	T	T	T	T	T	T	T	T	W	W	T	W	T	T	T	W	T	T	T	T	T	T	T	T	W	T	T	T	W	T	T	A	T	T	T	T	W	T	T	W
S1A_97033818	G/T	1A	97033818	+	G	G	G	G	G	G	G	G	G	G	K	G	G	K	G	K	G	K	G	G	K	G	G	G	G	G	G	G	G	K	G	G	G	G	G	G	G	G	G	G	K	G	G	G	G
S1A_97033825	C/A	1A	97033825	+	C	C	C	C	C	C	M	C	C	C	C	C	C	C	C	C	C	C	A	C	C	C	C	C	C	C	A	C	C	C	C	C	C	C	C	C	C	C	C	C	C	M	M	C	C
S1A_97033836	T/A	1A	97033836	+	T	T	T	T	T	T	T	T	T	T	T	T	W	T	T	T	T	T	T	T	T	T	T	T	T	T	T	T	T	T	T	T	T	T	W	T	T	T	W	W	T	T	T	T	T
S1A_97033847	C/A	1A	97033847	+	C	C	C	C	C	C	C	C	C	C	C	C	C	C	C	C	M	C	C	C	C	C	C	C	C	C	C	C	C	C	M	C	C	C	C	M	C	C	C	C	C	C	C	C	C
S1A_97033857	T/A	1A	97033857	+	T	T	T	T	T	T	T	W	A	T	T	T	T	T	T	T	T	T	T	T	T	A	T	W	T	T	T	T	T	W	T	T	T	T	T	T	W	W	T	T	T	T	W	T	T
S1A_99380676	G/T	1A	99380676	+	G	G	G	G	G	G	G	G	G	G	G	G	G	K	G	G	G	G	G	G	G	T	G	G	G	G	K	G	G	G	K	K	G	G	G	K	G	G	K	G	G	G	G	K	G
S1A_112667195	A/G	1A	112667195	+	A	A	A	R	A	R	A	A	A	A	A	A	A	A	A	A	A	A	A	A	A	A	A	R	R	A	A	R	A	A	A	A	A	A	A	A	A	A	R	A	A	A	A	A	A
S1A_112667222	G/A	1A	112667222	+	G	G	G	R	G	R	G	G	G	G	G	G	G	G	G	G	G	G	G	G	G	G	G	R	R	G	G	R	G	G	G	G	G	G	G	G	G	G	R	G	G	G	G	G	R
S1A_114191785	A/T	1A	114191785	+	T	W	A	A	A	A	A	A	A	A	A	A	W	A	A	A	A	A	A	A	A	A	A	A	T	A	T	A	A	A	A	A	A	W	A	A	A	A	A	A	T	A	W	A	A
S1A_114196969	T/A	1A	114196969	+	T	T	T	T	T	T	T	A	T	T	T	T	T	T	T	T	T	T	T	T	W	T	T	T	T	T	W	T	T	T	T	T	T	W	T	T	T	T	T	T	T	T	T	T	T
S1A_116866850	T/A	1A	116866850	+	A	T	T	W	T	T	W	T	T	T	T	W	T	T	T	T	W	T	T	T	T	T	T	T	W	T	T	T	T	W	T	T	T	T	W	T	T	W	W	W	T	W	T	T	T
S1A_119526864	G/A	1A	119526864	+	G	G	G	G	G	G	G	G	G	G	G	G	G	G	G	G	G	G	G	G	G	G	G	G	G	G	G	G	G	G	G	G	G	G	G	G	G	G	G	G	G	G	G	G	G
S1A_120924850	C/G	1A	120924850	+	C	C	C	C	C	C	C	C	C	C	C	C	C	C	C	C	C	G	C	C	C	C	C	C	C	C	C	C	C	C	C	C	C	C	C	C	S	S	C	C	C	S	C	C	C
S1A_122350628	G/A	1A	122350628	+	R	G	G	G	G	G	G	G	G	R	G	G	G	G	G	R	G	G	G	G	G	G	R	R	G	G	G	G	R	G	G	G	G	G	G	R	G	G	G	G	G	R	G	G	G
S1A_128675281	A/T	1A	128675281	+	A	A	A	A	A	A	A	A	W	A	A	A	W	A	A	A	A	A	A	A	A	W	A	W	A	A	A	A	A	A	A	A	A	A	A	A	A	A	W	A	W	A	A	A	A
S1A_129714981	G/A	1A	129714981	+	G	G	G	G	G	G	G	G	G	G	G	G	G	G	G	G	G	G	G	G	G	G	G	G	G	G	G	G	G	G	G	G	R	G	G	G	R	G	R	G	G	G	G	G	G
S1A_133776813	C/T	1A	133776813	+	C	C	C	Y	C	C	C	Y	C	C	C	C	C	C	C	C	Y	C	C	C	C	C	C	Y	C	C	C	C	C	C	C	C	C	C	C	C	C	C	C	C	C	C	C	C	C
S1A_140367294	T/C	1A	140367294	+	T	T	T	T	T	T	T	T	T	T	T	T	T	T	T	T	Y	T	T	T	T	T	T	T	T	T	Y	T	T	T	T	Y	T	T	T	T	T	Y	T	T	T	T	T	T	T
S1A_141912527	A/C	1A	141912527	+	A	A	M	A	A	A	A	M	M	A	M	A	A	A	M	A	A	A	A	A	A	A	A	A	A	A	A	A	A	A	A	A	A	A	A	A	A	A	A	A	M	A	A	A	A
S1A_142489622	T/C	1A	142489622	+	Y	T	Y	T	T	T	Y	C	T	T	Y	T	Y	T	T	T	T	T	T	T	T	T	T	T	T	T	T	T	T	Y	T	T	T	T	C	T	T	Y	T	T	T	T	T	T	T
S1A_142489629	C/T	1A	142489629	+	C	C	Y	C	C	C	Y	T	C	C	Y	C	C	C	C	C	C	C	C	C	C	C	C	C	C	C	C	C	C	Y	C	C	C	C	T	C	C	Y	C	C	C	C	C	C	C
S1A_142489637	T/C	1A	142489637	+	Y	T	Y	T	T	T	Y	C	T	T	Y	T	Y	T	T	T	T	T	T	T	T	T	T	T	T	T	T	T	T	Y	T	T	T	T	C	T	T	Y	T	T	T	T	T	T	T
S1A_145092690	G/C	1A	145092690	+	G	G	G	G	G	G	G	C	G	G	S	G	G	G	G	G	G	G	G	G	G	G	G	G	G	G	G	G	G	G	G	G	G	G	G	G	G	G	G	G	G	G	G	G	G
S1A_146473421	T/C	1A	146473421	+	T	Y	T	T	C	T	T	T	T	Y	T	T	C	T	T	T	T	T	C	C	Y	T	T	Y	T	T	C	T	T	Y	Y	Y	T	T	T	C	T	T	T	T	Y	T	T	Y	T
S1A_146473436	T/C	1A	146473436	+	T	Y	T	T	C	T	T	T	T	Y	T	T	C	T	T	T	T	T	C	C	Y	T	T	Y	T	T	C	T	T	Y	Y	Y	T	T	T	C	T	T	T	T	Y	T	T	Y	T
S1A_146473446	A/G	1A	146473446	+	A	R	A	A	A	A	A	A	A	R	A	A	G	A	A	A	A	A	G	G	R	A	A	R	A	A	G	A	A	R	R	R	A	A	A	G	A	A	A	A	R	A	A	R	A
S1A_157548791	C/T	1A	157548791	+	C	C	C	C	C	C	C	C	C	C	C	C	C	C	C	C	C	Y	C	C	C	C	C	C	C	C	T	C	C	C	Y	C	C	C	C	Y	C	C	T	C	C	C	C	C	C
S1A_159381462	C/G	1A	159381462	+	C	C	C	C	C	C	C	C	C	C	C	C	C	C	C	C	C	C	C	C	C	C	C	C	C	C	C	C	C	C	C	C	S	C	C	C	C	C	C	C	C	C	C	C	C
S1A_161838098	C/T	1A	161838098	+	C	C	C	C	C	C	Y	Y	C	C	Y	C	C	C	C	C	C	C	C	Y	C	Y	C	C	C	C	C	C	C	Y	C	Y	C	C	C	C	C	C	C	C	C	C	C	C	C
S1A_162923359	C/G	1A	162923359	+	C	C	C	C	C	C	C	C	C	C	C	C	C	C	C	C	C	C	C	C	C	C	S	S	C	C	C	C	C	C	C	C	C	C	C	C	C	C	C	C	C	C	C	C	G
S1A_174557299	T/G	1A	174557299	+	T	T	T	T	T	T	T	T	T	T	T	T	K	T	T	T	T	T	T	T	T	T	T	T	T	T	K	T	T	T	T	K	T	T	T	K	T	T	T	T	T	T	T	T	T
S1A_182753453	A/T	1A	182753453	+	A	A	A	A	A	A	A	A	A	A	A	W	W	A	A	A	A	A	A	W	A	A	A	W	A	A	A	A	A	A	W	A	A	A	A	A	A	A	A	A	A	A	A	A	A
S1A_182753475	T/G	1A	182753475	+	T	T	T	T	T	T	T	T	T	T	G	K	T	T	G	T	T	T	K	T	T	K	T	T	T	T	T	T	T	G	T	T	T	T	G	T	T	G	K	T	T	T	T	T	K
S1A_182753479	T/C	1A	182753479	+	T	T	T	T	T	T	T	T	T	T	C	Y	T	T	C	T	T	T	Y	T	T	Y	T	T	T	T	T	T	T	C	T	T	T	T	C	T	T	C	Y	T	T	T	T	T	Y
S1A_186701837	C/G	1A	186701837	+	C	C	C	C	C	C	C	C	C	S	C	C	C	S	C	C	C	C	C	C	C	C	G	C	C	C	C	C	C	G	C	C	C	C	C	C	C	C	C	C	C	C	C	C	C
S1A_207979359	A/T	1A	207979359	+	A	A	A	A	A	A	A	W	W	A	A	A	W	W	A	A	A	A	A	A	A	A	A	A	W	A	A	A	A	A	A	A	A	W	A	A	W	A	A	W	A	A	A	A	A
S1A_213016889	A/C	1A	213016889	+	A	A	A	A	A	A	A	A	A	A	A	A	A	A	A	A	A	A	A	A	A	A	A	A	M	A	A	A	A	A	A	A	A	A	M	A	C	A	A	A	A	A	A	A	A
S1A_221917901	C/T	1A	221917901	+	T	C	C	T	C	C	C	C	C	C	C	C	C	C	C	C	C	C	C	C	C	C	C	C	C	C	C	C	C	C	C	Y	C	C	C	C	C	C	C	Y	C	Y	C	C	C
S1A_222180788	G/C	1A	222180788	+	G	G	G	G	G	G	G	S	G	G	G	S	G	S	G	G	G	G	G	S	G	G	G	G	G	G	G	G	G	G	G	G	G	G	G	G	S	G	S	G	G	G	G	G	G
S1A_225763172	T/G	1A	225763172	+	T	T	T	T	K	T	T	T	T	T	T	T	T	T	T	T	T	T	K	T	T	T	T	T	T	T	T	T	T	K	T	T	T	T	T	K	T	G	T	T	T	K	T	T	T
S1A_225763185	A/G	1A	225763185	+	A	A	A	A	A	A	A	A	A	A	A	A	A	A	A	A	A	A	A	A	A	A	A	A	A	A	A	A	A	A	A	A	A	A	A	R	A	G	A	A	A	A	A	A	A
S1A_226593564	T/A	1A	226593564	+	T	T	T	T	T	T	T	T	T	W	T	T	T	T	T	T	T	T	T	T	T	T	W	W	T	W	T	W	T	T	T	T	T	T	T	T	T	W	T	T	T	T	T	T	T
S1A_227228430	C/T	1A	227228430	+	C	C	C	Y	C	C	C	C	C	Y	C	C	C	Y	C	C	Y	C	Y	C	C	C	C	C	C	Y	C	C	Y	C	C	C	T	C	C	C	C	C	C	C	C	Y	C	Y	C
S1A_229363976	A/G	1A	229363976	+	A	A	A	A	A	A	A	R	A	A	A	A	A	A	A	A	A	A	A	A	A	A	A	A	A	A	A	A	A	A	A	A	A	A	A	A	A	A	A	A	A	A	A	A	A
S1A_231722957	G/A	1A	231722957	+	G	G	G	G	A	G	G	G	G	G	R	G	G	G	G	G	G	G	G	G	G	G	R	G	G	G	G	G	R	G	G	R	G	G	G	G	G	R	G	G	R	G	G	G	G
S1A_239997603	T/A	1A	239997603	+	T	W	T	W	T	T	W	T	T	T	T	T	W	T	T	W	T	T	T	T	T	T	T	T	T	T	T	T	T	T	T	T	W	T	T	T	T	T	T	T	T	W	T	T	T
S1A_239997637	G/T	1A	239997637	+	G	G	K	G	G	G	K	G	G	G	G	G	G	G	G	G	K	G	G	G	G	G	G	G	G	G	G	G	G	G	G	G	G	G	G	G	G	G	G	G	G	G	G	G	G
S1A_242311615	G/A	1A	242311615	+	R	G	R	G	G	A	G	A	G	G	G	R	G	G	G	G	A	A	R	A	G	R	G	G	R	G	G	G	G	A	R	R	G	A	A	A	A	R	G	R	G	G	G	G	A
S1A_251178108	G/C	1A	251178108	+	S	G	G	S	G	G	G	G	G	G	G	G	G	G	G	G	G	G	G	G	G	G	G	G	G	G	G	S	G	G	G	G	S	G	S	G	G	G	G	G	G	G	S	G	S
S1A_261050436	T/A	1A	261050436	+	T	T	T	T	T	T	T	T	T	T	T	T	T	T	T	T	T	T	T	T	T	T	T	T	T	T	T	T	T	T	W	W	T	T	T	T	W	T	W	T	A	T	T	T	T
S1A_261360375	G/C	1A	261360375	+	G	G	G	G	G	G	G	G	G	S	G	G	G	S	G	G	G	G	G	G	G	G	G	G	G	G	G	G	S	G	S	G	G	G	G	G	G	G	G	G	G	G	S	G	G
S1A_263702473	T/C	1A	263702473	+	C	T	C	T	T	T	C	C	T	C	C	T	T	T	T	T	T	T	C	T	T	C	C	C	C	T	C	C	T	C	T	T	C	T	C	C	T	C	T	C	T	C	C	C	T
S1A_266151963	C/T	1A	266151963	+	C	C	Y	C	C	C	C	C	T	C	C	Y	Y	C	C	C	Y	C	C	C	C	C	C	C	Y	C	C	Y	C	C	C	C	C	C	C	C	C	C	C	C	C	C	C	C	C
S1A_268884297	G/A	1A	268884297	+	G	G	G	G	R	R	G	R	G	R	G	G	G	G	G	G	G	G	G	G	G	G	G	G	G	G	G	G	G	G	G	G	G	G	G	G	G	R	G	G	G	G	G	G	G
S1A_270444427	G/A	1A	270444427	+	G	G	G	R	R	R	G	G	G	R	G	G	G	G	G	G	G	G	G	G	G	R	G	G	G	R	G	G	A	G	G	G	G	G	G	G	R	R	G	G	R	G	G	G	R
S1A_271426617	A/T	1A	271426617	+	A	W	A	A	A	A	W	A	A	A	A	W	A	A	W	W	A	A	A	A	A	A	A	A	A	A	W	A	W	A	W	A	A	A	A	A	A	A	A	W	A	A	A	W	W
S1A_275190265	C/T	1A	275190265	+	C	C	C	C	C	C	C	C	C	C	Y	C	C	C	C	C	C	C	C	C	C	C	Y	C	C	C	C	C	Y	C	C	C	C	T	Y	C	C	C	C	C	C	Y	C	C	C
S1A_275328155	T/C	1A	275328155	+	T	C	T	T	C	C	T	T	T	C	T	T	T	T	T	T	T	T	T	T	T	T	T	T	T	T	T	T	T	T	T	T	T	T	T	T	T	T	T	T	T	T	T	T	T
S1A_280313743	A/G	1A	280313743	+	A	A	A	A	A	A	A	A	A	A	A	A	A	A	A	A	A	A	A	A	A	A	A	A	A	A	A	A	A	A	A	A	A	A	A	A	A	A	A	G	A	A	A	A	R
S1A_280575176	G/T	1A	280575176	+	G	G	G	G	G	G	G	G	G	G	G	G	G	G	G	G	G	K	G	G	G	G	G	G	G	G	K	G	G	G	K	G	G	G	G	G	G	G	K	G	G	G	K	G	G
S1A_280575211	A/T	1A	280575211	+	A	A	A	A	A	A	A	A	A	A	A	A	A	T	A	A	A	T	A	A	A	A	A	A	A	A	W	A	A	A	T	T	A	A	A	W	A	A	T	A	A	A	A	A	A
S1A_280575237	G/A	1A	280575237	+	G	G	G	G	G	G	G	G	G	G	G	G	G	A	G	G	G	A	G	G	G	G	G	G	G	G	R	G	G	G	A	A	G	G	G	R	G	G	A	G	G	G	G	G	G
S1A_283748859	C/T	1A	283748859	+	C	C	C	C	C	C	C	C	C	C	C	C	T	C	C	C	Y	C	C	C	C	C	C	C	C	C	C	C	C	C	C	C	C	C	C	C	Y	Y	T	C	C	C	C	C	C
S1A_288410195	G/T	1A	288410195	+	G	G	G	G	K	G	G	G	K	G	G	G	G	G	G	G	G	K	G	G	G	K	G	G	G	G	K	G	G	G	G	G	G	G	G	G	G	G	G	G	G	G	G	G	G
S1A_292157184	A/G	1A	292157184	+	A	A	A	G	A	A	A	A	A	G	A	G	G	G	A	A	G	G	G	G	G	G	A	A	A	G	A	G	A	A	A	A	G	A	A	G	A	A	A	G	A	G	A	G	A
S1A_292517193	G/C	1A	292517193	+	C	G	G	C	G	G	G	G	G	C	G	C	C	C	G	G	C	C	C	C	C	C	G	G	G	C	G	C	G	G	G	G	C	G	G	C	G	G	G	C	G	C	G	C	G
S1A_292741126	T/A	1A	292741126	+	T	T	T	T	T	T	T	T	T	W	T	T	T	T	T	T	W	T	T	W	W	T	T	W	T	T	T	T	T	T	T	T	W	T	T	T	T	T	T	T	T	T	T	T	T
S1A_293399474	G/T	1A	293399474	+	K	G	G	G	G	G	G	G	G	G	G	K	K	G	G	K	G	G	G	G	G	G	G	G	G	G	G	G	G	G	G	G	G	G	G	G	G	G	G	G	G	G	G	G	G
S1A_293536569	C/T	1A	293536569	+	C	C	C	C	C	C	C	C	C	C	Y	C	C	C	C	C	C	C	C	C	C	C	C	C	C	T	C	Y	C	Y	C	C	C	C	C	C	C	Y	C	C	C	C	C	C	C
S1A_293536582	G/A	1A	293536582	+	A	G	R	G	G	G	A	A	G	G	G	G	A	G	G	G	A	A	G	G	G	A	G	R	G	G	G	G	A	R	G	A	A	A	G	G	G	G	G	A	A	A	G	G	A
S1A_294137475	C/T	1A	294137475	+	C	C	C	Y	C	C	T	Y	C	C	Y	Y	C	C	C	C	C	Y	C	Y	Y	C	C	C	C	C	C	Y	C	C	Y	C	C	C	C	C	C	C	Y	C	C	C	C	C	C
S1A_294564144	C/G	1A	294564144	+	C	C	C	C	C	C	C	C	G	C	G	C	C	C	C	C	C	C	S	G	C	C	C	C	S	C	C	C	C	G	C	C	C	C	G	C	C	G	C	C	C	C	C	C	C
S1A_298004825	C/T	1A	298004825	+	C	Y	T	T	C	C	C	C	C	T	C	C	C	C	C	Y	Y	C	C	Y	C	C	Y	C	C	Y	C	C	C	Y	C	C	C	C	C	C	C	C	C	C	C	C	C	C	C
S1A_298004832	A/G	1A	298004832	+	A	R	G	G	A	A	A	A	A	G	A	A	A	A	A	R	R	A	A	R	A	A	R	A	A	R	A	A	A	R	A	A	A	A	A	A	A	A	A	A	A	A	A	A	A
S1A_300693791	C/A	1A	300693791	+	C	C	C	C	M	M	C	C	C	C	C	M	M	M	C	A	M	A	M	M	C	A	C	C	C	C	C	M	C	C	C	C	C	C	C	C	C	C	C	C	C	C	C	M	C
S1A_303495709	G/T	1A	303495709	+	G	G	G	G	G	G	G	G	G	G	K	G	G	G	G	G	G	G	K	G	G	G	K	K	K	G	G	G	G	G	G	G	G	G	K	G	G	K	G	G	G	G	G	G	G
S1A_304302916	T/C	1A	304302916	+	T	C	T	T	T	T	T	T	Y	T	T	C	Y	Y	T	T	Y	C	T	Y	C	T	T	T	T	T	T	T	T	T	T	T	Y	T	T	T	T	T	T	T	T	T	T	T	T
S1A_304302954	A/G	1A	304302954	+	A	G	A	A	A	A	A	A	R	A	A	G	R	R	A	A	R	G	A	R	G	A	A	A	A	A	A	A	A	A	A	A	R	A	A	A	A	A	A	A	A	A	A	A	A
S1A_304638655	G/T	1A	304638655	+	G	K	G	G	G	G	K	G	G	G	G	G	G	G	G	G	G	G	G	G	G	K	G	G	G	G	G	G	G	G	G	G	G	K	G	G	G	G	G	G	G	G	G	G	G
S1A_304638661	T/A	1A	304638661	+	T	T	T	T	T	T	T	W	W	T	T	T	T	T	T	T	T	T	T	T	T	T	T	T	W	T	T	T	T	T	T	T	T	T	T	T	T	T	T	T	T	W	T	T	W
S1A_304638671	G/C	1A	304638671	+	G	G	G	G	S	G	G	G	G	G	G	S	G	G	G	G	G	G	S	G	G	G	G	G	G	G	S	G	G	G	G	G	G	G	G	G	G	G	G	G	G	G	G	G	G
S1A_304655744	C/A	1A	304655744	+	C	C	C	A	C	C	C	C	C	C	C	A	A	A	C	C	A	A	A	A	A	A	C	C	C	A	A	A	A	C	C	C	A	C	C	A	C	C	C	A	C	A	C	A	C
S1A_304882630	T/A	1A	304882630	+	A	W	A	T	T	A	T	A	W	T	T	A	A	W	A	T	T	T	T	T	T	W	T	T	T	T	W	A	W	T	A	T	A	T	T	T	A	T	A	A	T	A	T	T	A
S1A_307224952	C/T	1A	307224952	+	C	C	C	C	C	C	Y	C	Y	Y	C	C	C	C	C	C	C	Y	C	Y	C	C	C	Y	C	C	C	Y	C	C	C	C	C	C	C	C	C	C	C	C	C	C	C	C	C
S1A_307224970	G/T	1A	307224970	+	G	G	G	G	G	G	K	G	K	K	G	G	G	G	G	G	G	K	G	K	G	G	G	K	G	G	G	K	G	G	G	G	G	G	G	G	G	G	G	G	G	G	G	G	G
S1A_307824069	C/T	1A	307824069	+	T	C	C	T	C	C	C	C	C	T	C	T	T	T	C	C	T	T	T	T	T	T	C	C	C	T	T	T	T	C	C	C	T	C	C	T	C	C	C	T	C	T	C	T	C
S1A_311451339	C/G	1A	311451339	+	G	C	C	G	C	C	C	C	C	C	C	G	G	G	C	C	G	G	G	G	G	G	C	C	C	G	G	G	G	C	C	C	G	C	C	G	C	C	C	G	C	G	C	G	C
S1A_311451622	A/G	1A	311451622	+	G	A	A	G	A	A	A	A	A	G	A	G	G	G	A	A	G	G	G	G	G	G	A	A	A	G	G	G	G	A	A	A	G	A	A	G	A	A	A	G	A	G	G	G	A
S1A_311480605	C/T	1A	311480605	+	T	C	C	T	C	C	C	C	C	T	C	T	T	T	C	C	T	T	T	T	T	T	C	C	C	T	T	T	T	C	C	C	T	C	C	T	C	C	C	T	C	T	T	T	C
S1A_313833087	T/C	1A	313833087	+	C	T	T	C	T	T	T	T	T	C	T	C	C	C	T	T	C	C	C	C	C	C	T	T	T	C	C	C	C	T	T	T	C	T	T	C	T	T	T	C	T	C	C	C	T
S1A_314952099	G/T	1A	314952099	+	G	G	G	T	G	G	G	G	G	K	G	T	T	T	G	G	T	T	T	T	T	T	G	G	G	T	T	T	T	G	G	G	T	G	G	G	G	G	G	T	G	T	G	T	G
S1A_315257806	G/T	1A	315257806	+	T	G	G	T	G	G	G	G	G	T	G	T	T	T	G	G	T	T	T	T	T	T	G	G	G	T	T	T	T	G	G	G	T	G	G	T	G	G	G	T	G	T	G	T	G
S1A_315410928	C/T	1A	315410928	+	T	C	C	T	C	C	C	C	C	C	C	T	T	T	C	C	T	T	T	T	T	T	C	C	C	T	T	T	T	C	C	C	T	C	C	T	C	C	C	T	C	T	Y	T	C
S1A_316144407	C/T	1A	316144407	+	T	C	C	T	C	C	C	C	C	T	C	T	T	T	C	C	T	T	T	T	Y	T	C	C	C	T	T	T	T	C	C	C	T	C	C	T	C	C	C	T	C	T	T	T	C
S1A_317978519	C/T	1A	317978519	+	T	C	C	T	C	C	C	C	C	T	C	T	T	T	C	C	T	T	Y	T	T	T	C	C	C	T	T	T	T	C	C	C	T	C	C	T	C	C	C	T	C	T	C	T	C
S1A_319456751	G/T	1A	319456751	+	G	G	G	G	G	G	G	G	G	G	G	G	G	G	G	G	G	G	G	G	G	G	G	G	G	G	G	G	G	G	G	G	G	G	G	G	G	G	G	K	G	G	G	G	G
S1A_319456756	A/T	1A	319456756	+	A	A	W	A	A	A	A	A	A	A	A	A	T	A	A	A	A	A	A	A	A	A	A	A	A	A	A	A	A	A	A	A	A	A	A	A	A	A	A	A	W	A	A	A	A
S1A_320724785	C/A	1A	320724785	+	A	C	C	A	C	C	C	C	C	C	C	A	A	A	C	C	A	A	A	A	A	A	C	C	C	A	A	A	A	C	C	C	A	C	C	A	C	C	C	A	C	A	C	A	C
S1A_321472924	G/A	1A	321472924	+	R	G	G	G	G	G	G	G	G	G	R	G	G	G	G	G	R	G	G	G	G	G	G	G	G	G	G	G	R	G	G	G	R	G	G	G	G	G	G	G	G	G	G	R	G
S1A_321941595	C/T	1A	321941595	+	C	C	C	C	C	C	C	Y	C	C	C	C	C	C	Y	C	C	C	C	C	Y	Y	C	C	C	C	C	C	C	C	Y	C	C	Y	C	C	C	C	C	Y	C	C	C	C	C
S1A_321962024	C/A	1A	321962024	+	A	C	C	A	C	C	C	C	C	A	C	A	A	A	C	C	A	A	A	A	A	A	C	C	C	A	A	A	A	C	C	C	A	C	C	A	C	C	C	A	C	A	A	A	C
S1A_321962232	A/G	1A	321962232	+	G	A	A	G	A	A	A	A	A	G	A	G	G	G	A	A	G	G	G	G	G	G	A	A	A	G	G	G	G	A	A	A	G	A	A	G	A	A	A	G	A	G	G	G	A
S1A_321965079	T/C	1A	321965079	+	C	T	T	C	T	T	T	T	T	C	T	C	C	C	T	T	C	C	C	C	C	C	T	T	T	C	C	C	C	T	T	T	C	T	T	C	T	T	T	C	T	C	C	C	T
S1A_322016788	C/A	1A	322016788	+	C	C	M	C	A	M	C	M	M	C	A	C	C	C	C	C	C	C	C	C	C	M	C	C	M	M	A	A	M	C	C	C	C	C	C	C	C	C	C	C	C	C	C	M	A
S1A_322016789	C/T	1A	322016789	+	C	C	Y	C	T	Y	C	Y	Y	C	T	C	C	C	C	C	C	C	C	C	C	Y	C	C	Y	Y	T	T	Y	C	C	C	C	C	C	C	C	C	C	C	C	C	C	Y	Y
S1A_331341858	G/A	1A	331341858	+	A	G	A	G	G	G	G	G	G	G	G	G	G	G	G	G	G	G	G	G	G	G	G	R	R	G	R	G	G	G	G	G	G	G	A	G	R	G	G	G	R	G	G	G	G
S1A_331354018	C/T	1A	331354018	+	T	T	C	C	Y	C	C	Y	C	C	C	C	C	C	C	C	C	C	C	C	C	C	C	C	C	C	C	C	C	C	Y	C	C	C	C	C	C	C	C	C	C	C	C	C	C
S1A_332893142	G/T	1A	332893142	+	G	G	G	G	G	G	G	G	G	G	G	G	G	G	G	G	G	K	G	G	G	G	G	G	G	G	K	G	G	G	K	K	G	G	G	K	G	G	G	G	G	G	G	G	G
S1A_335624944	T/A	1A	335624944	+	T	T	T	T	T	T	T	T	T	T	T	T	T	T	T	W	W	T	T	T	T	T	T	T	T	T	T	T	T	T	T	T	T	T	W	T	T	W	T	W	T	T	T	T	W
S1A_339530926	A/T	1A	339530926	+	A	A	W	A	A	W	A	A	A	A	W	A	A	A	A	W	W	A	W	A	A	A	A	A	A	A	W	A	A	A	A	A	W	A	A	A	A	A	A	A	W	A	A	A	A
S1A_346029659	T/G	1A	346029659	+	T	T	T	T	T	T	T	K	K	T	K	T	T	T	T	T	T	T	T	T	T	T	K	T	K	T	T	T	T	T	T	T	T	T	T	T	T	T	T	T	T	T	T	T	T
S1A_350237383	G/C	1A	350237383	+	G	G	G	G	G	G	G	G	G	S	G	G	G	G	G	G	G	G	S	G	G	G	S	G	G	G	G	G	G	G	G	S	G	G	G	G	G	S	S	S	G	G	G	S	G
S1A_354615226	C/T	1A	354615226	+	T	C	C	C	C	C	C	T	C	C	C	C	C	T	C	Y	C	C	C	Y	C	T	C	C	C	C	C	Y	Y	C	Y	Y	C	C	C	C	Y	C	C	Y	C	C	C	C	C
S1A_355433495	G/C	1A	355433495	+	G	G	G	G	G	G	G	G	S	G	G	G	G	G	G	G	G	G	G	G	G	G	G	G	G	G	G	S	C	G	G	G	G	G	G	S	G	G	G	G	G	S	G	G	G
S1A_359268027	T/A	1A	359268027	+	T	T	T	T	T	T	T	T	T	T	T	T	T	T	T	T	T	T	T	T	T	T	A	A	A	T	T	T	T	T	A	A	T	A	T	T	A	T	A	T	A	T	T	T	A
S1A_360737531	A/G	1A	360737531	+	A	A	A	A	A	A	A	A	A	A	A	A	A	A	A	A	A	A	A	A	A	A	G	G	G	A	A	A	A	A	G	G	A	G	A	A	G	A	G	A	G	A	A	A	G
S1A_360737599	C/G	1A	360737599	+	C	C	C	C	C	C	C	C	C	C	C	C	C	C	C	C	C	C	C	C	C	C	G	G	G	C	C	C	C	C	G	G	C	G	C	C	G	C	G	C	G	C	C	C	G
S1A_362545802	G/A	1A	362545802	+	G	G	G	G	G	G	G	G	G	G	G	G	G	G	G	G	G	G	G	G	G	G	A	A	A	G	G	G	G	G	A	A	G	A	G	G	A	G	A	G	A	G	G	G	A
S1A_365674023	T/C	1A	365674023	+	T	T	T	T	T	T	T	T	T	T	T	T	T	T	T	T	T	T	T	T	T	T	C	C	C	T	T	T	T	T	C	C	T	C	T	T	C	T	C	T	C	T	T	T	C
S1A_366924469	C/T	1A	366924469	+	C	C	C	C	C	T	C	T	T	C	C	C	C	C	C	C	C	C	C	C	C	C	C	Y	C	C	C	C	C	C	C	C	C	C	C	C	C	C	C	C	C	Y	C	Y	T
S1A_367572454	A/G	1A	367572454	+	A	A	A	A	A	A	A	A	A	A	A	A	A	A	A	A	A	A	A	A	A	A	G	G	G	A	A	A	A	A	G	G	A	G	A	A	G	A	G	A	G	A	A	A	G
S1A_367713758	C/T	1A	367713758	+	C	C	C	C	C	C	C	C	C	C	C	C	C	C	C	C	C	C	C	C	C	C	T	T	T	C	C	C	C	C	T	T	C	T	C	C	T	C	T	C	T	C	C	C	T
S1A_368023084	C/G	1A	368023084	+	C	C	C	C	C	C	C	C	C	C	C	C	C	C	C	C	C	C	C	C	C	C	G	G	G	C	C	C	C	C	G	G	C	G	C	C	G	C	G	C	G	C	C	C	G
S1A_368023107	A/G	1A	368023107	+	A	A	A	A	A	A	A	A	A	A	A	A	A	A	A	A	A	A	A	A	A	A	G	G	G	A	A	A	A	A	G	G	A	G	A	A	G	A	G	A	G	A	A	A	G
S1A_368535480	C/T	1A	368535480	+	C	C	C	C	C	C	C	C	C	C	C	C	C	C	C	C	C	C	C	C	C	C	T	T	T	C	C	C	C	C	T	T	C	T	C	C	T	C	T	C	T	C	C	C	T
S1A_369792720	T/C	1A	369792720	+	T	T	T	T	T	T	T	T	T	T	T	T	T	T	T	T	T	T	T	T	T	T	C	C	C	T	T	T	T	T	C	C	T	C	T	T	C	T	C	T	C	T	T	T	C
S1A_369792721	C/G	1A	369792721	+	C	C	C	C	C	C	C	C	C	C	C	C	C	C	C	C	C	C	C	C	C	C	G	G	G	C	C	C	C	C	G	G	C	G	C	C	G	C	G	C	G	C	C	C	G
S1A_370139753	G/A	1A	370139753	+	G	G	G	G	G	G	G	G	G	G	G	G	G	G	G	G	G	G	G	G	G	G	A	A	A	G	G	G	G	G	A	A	G	A	G	G	A	G	A	G	A	G	G	G	A
S1A_370140592	T/G	1A	370140592	+	T	T	T	T	T	T	T	T	T	T	T	T	T	T	T	T	T	T	T	T	T	T	G	G	G	T	T	T	T	T	G	G	T	G	T	T	G	T	G	T	G	T	T	T	G
S1A_370224590	C/G	1A	370224590	+	C	C	C	C	C	C	C	C	C	C	C	C	C	C	C	C	C	C	C	C	C	C	G	G	G	C	C	C	C	C	G	G	C	G	C	C	G	C	G	C	G	C	C	C	G
S1A_370919293	A/G	1A	370919293	+	A	A	A	A	A	A	A	A	A	A	A	A	A	A	A	A	A	A	A	A	A	A	G	G	G	A	A	A	A	A	G	G	A	G	A	A	G	A	G	A	G	A	A	A	G
S1A_372108029	C/T	1A	372108029	+	T	C	C	T	C	C	C	Y	C	C	Y	C	C	C	C	C	C	C	C	C	Y	C	C	C	C	C	T	T	C	C	Y	C	C	C	C	Y	T	C	C	Y	C	C	C	C	C
S1A_373349453	C/A	1A	373349453	+	A	C	C	A	C	C	C	C	C	A	C	C	C	C	C	C	C	C	A	C	C	A	C	C	C	A	A	A	A	C	C	C	A	C	C	A	C	C	C	A	C	A	A	A	C
S1A_373438251	G/A	1A	373438251	+	G	R	G	G	G	G	G	G	G	R	G	G	G	G	R	G	G	G	G	G	G	A	G	R	R	G	G	A	G	G	G	G	G	G	G	G	G	G	G	G	G	G	G	G	G
S1A_373438287	G/T	1A	373438287	+	G	K	G	G	G	G	G	G	G	K	G	G	G	G	K	G	G	G	G	G	G	T	G	K	K	G	G	T	G	G	G	G	G	G	G	G	G	G	G	G	G	G	G	G	G
S1A_375649521	G/A	1A	375649521	+	G	G	G	G	G	G	G	G	G	G	G	G	G	G	G	G	G	G	G	G	G	G	A	G	G	G	G	G	G	G	R	R	G	G	G	G	R	G	G	G	G	G	R	G	R
S1A_375649533	A/G	1A	375649533	+	A	A	A	G	A	A	A	R	A	A	A	R	A	A	R	R	A	A	A	A	A	A	A	A	A	A	A	A	A	A	A	A	A	A	A	A	A	A	A	A	A	A	A	A	A
S1A_377001048	G/A	1A	377001048	+	G	G	G	G	G	G	G	G	G	G	G	R	G	G	G	G	G	R	G	G	G	G	G	R	G	G	G	G	R	G	G	G	G	G	G	G	G	G	G	G	R	G	G	G	G
S1A_377001067	C/T	1A	377001067	+	C	C	Y	C	C	C	Y	C	C	C	Y	C	C	C	Y	Y	C	C	C	C	C	C	C	C	C	C	Y	C	C	C	C	C	Y	C	C	C	C	Y	C	C	C	C	C	C	C
S1A_377253045	A/T	1A	377253045	+	A	A	A	A	A	W	W	W	A	A	A	A	A	A	A	A	W	A	A	A	A	A	W	A	A	A	A	A	A	A	A	A	A	A	W	A	A	W	A	A	A	A	W	A	A
S1A_377253046	A/T	1A	377253046	+	A	A	A	A	A	A	A	A	W	A	W	A	A	A	A	A	W	A	A	A	A	A	A	A	A	A	W	A	A	A	W	A	W	A	A	A	A	W	A	A	A	A	A	A	A
S1A_377635097	G/A	1A	377635097	+	G	G	G	G	R	G	G	G	G	R	G	G	G	G	G	G	G	G	G	G	R	G	R	G	G	G	G	G	G	G	G	G	A	A	G	G	G	G	G	G	G	G	G	G	R
S1A_385699261	C/G	1A	385699261	+	S	C	C	C	C	C	S	G	C	C	C	C	C	C	C	S	C	C	C	C	C	C	C	C	C	C	G	C	G	C	C	C	S	C	C	S	C	C	C	C	C	S	C	G	C
S1A_385699268	G/A	1A	385699268	+	R	G	G	G	G	G	G	G	G	G	G	G	G	G	R	R	G	G	G	G	G	R	G	G	R	G	G	G	G	G	G	G	G	G	G	G	G	A	G	G	G	G	G	G	G
S1A_387864716	C/G	1A	387864716	+	C	S	C	C	C	S	C	S	C	S	C	C	C	C	C	C	C	C	C	C	C	C	C	C	C	C	C	C	C	C	C	C	C	C	C	C	C	S	C	C	C	C	C	C	C
S1A_387998464	A/T	1A	387998464	+	A	W	A	A	A	A	A	A	A	A	A	A	A	A	A	A	A	A	A	A	A	A	A	A	W	A	A	A	A	A	A	A	A	A	A	A	A	A	A	A	A	W	A	A	A
S1A_391433493	G/A	1A	391433493	+	A	G	G	G	G	G	G	G	G	G	G	G	G	G	G	G	G	G	G	G	G	G	A	A	A	G	G	G	G	G	A	A	G	A	G	G	A	G	A	G	A	G	G	G	A
S1A_392314491	C/A	1A	392314491	+	C	C	C	C	C	C	C	C	C	C	C	C	C	C	C	C	C	A	C	C	C	C	C	C	C	C	M	C	C	C	A	M	C	C	C	M	C	C	M	C	C	C	C	C	C
S1A_392314521	G/A	1A	392314521	+	G	G	G	G	G	G	G	G	G	G	G	G	G	G	G	G	G	A	G	G	G	G	G	G	G	G	R	G	G	G	A	R	G	G	G	R	G	G	R	G	G	G	G	G	G
S1A_394768574	G/C	1A	394768574	+	G	G	G	G	G	G	G	G	G	G	S	G	S	G	G	G	G	G	S	G	S	G	G	G	G	G	G	G	G	G	G	G	G	G	G	G	G	G	G	G	G	C	G	G	G
S1A_396255168	A/C	1A	396255168	+	A	A	A	A	A	A	A	A	A	A	A	A	A	A	A	A	A	A	A	A	A	A	C	C	C	A	A	A	A	A	C	C	A	C	A	A	C	A	C	A	C	A	C	A	C
S1A_396528584	G/T	1A	396528584	+	G	G	G	G	G	G	G	G	G	K	G	G	G	G	G	G	G	G	G	G	G	G	T	T	T	G	G	G	G	G	T	T	G	T	T	G	T	G	T	G	T	G	T	G	T
S1A_396857817	T/A	1A	396857817	+	T	T	T	T	T	T	W	T	T	T	T	T	T	T	T	T	T	T	T	T	T	T	T	W	T	T	T	T	T	A	T	T	T	T	T	T	T	T	T	T	W	T	T	T	T
S1A_396962561	G/A	1A	396962561	+	G	G	G	G	G	R	G	G	G	G	G	R	G	A	G	G	R	G	G	A	R	G	G	G	G	G	R	R	G	G	A	G	G	R	G	G	G	G	A	G	A	G	G	R	R
S1A_397166611	G/A	1A	397166611	+	G	G	G	G	G	G	G	G	G	G	G	G	G	G	G	G	G	G	G	G	G	G	A	A	A	G	G	G	G	G	A	A	G	A	G	G	A	G	A	G	A	G	G	G	A
S1A_402628842	G/C	1A	402628842	+	G	G	G	G	G	S	S	S	G	G	S	G	G	G	S	S	G	G	G	G	G	G	S	S	S	G	S	G	S	G	C	C	G	C	G	G	C	G	C	G	C	G	G	G	C
S1A_403432110	G/A	1A	403432110	+	G	G	G	G	G	G	G	G	G	G	G	G	G	G	G	G	G	G	G	G	G	G	G	G	G	G	G	G	G	G	A	A	G	A	G	G	A	G	A	G	A	G	G	G	A
S1A_403888787	T/A	1A	403888787	+	T	T	T	T	T	T	T	T	T	W	T	T	T	T	T	T	T	T	T	T	T	T	T	T	T	T	W	W	T	T	W	T	T	T	T	T	T	T	T	T	T	T	W	T	T
S1A_403888948	A/G	1A	403888948	+	A	A	A	A	A	A	A	A	A	R	A	A	A	A	A	A	A	A	A	A	R	A	A	A	A	A	A	A	A	A	G	G	A	G	A	A	G	A	G	A	G	A	G	A	G
S1A_403888984	G/C	1A	403888984	+	S	G	G	G	G	S	G	G	G	G	G	S	G	G	G	S	S	G	G	G	G	G	S	G	G	S	G	G	G	G	G	G	G	G	G	G	G	G	G	G	G	S	G	G	G
S1A_404601758	C/A	1A	404601758	+	C	C	C	C	C	C	C	C	C	C	C	C	C	C	C	C	C	C	C	C	C	C	C	C	C	C	C	C	C	C	A	A	C	A	C	C	A	C	A	C	A	C	C	C	A
S1A_404601780	A/G	1A	404601780	+	A	A	A	A	A	A	A	A	A	A	A	A	A	A	A	A	A	A	A	A	A	A	A	A	A	A	A	A	A	A	G	G	A	G	A	A	G	A	G	A	G	A	A	A	G
S1A_407860912	G/C	1A	407860912	+	G	G	G	G	G	G	S	S	G	G	G	G	C	G	S	G	G	G	G	G	G	G	G	G	G	G	G	G	G	G	S	G	G	G	G	G	G	G	G	G	G	G	C	G	G
S1A_409861202	T/A	1A	409861202	+	W	T	T	T	T	T	T	T	T	T	T	T	W	T	W	T	T	T	T	T	T	T	T	T	T	T	T	T	T	T	T	T	W	W	T	T	T	T	T	T	T	W	W	W	T
S1A_410480583	C/T	1A	410480583	+	C	C	C	C	C	C	C	C	C	T	C	C	C	C	T	C	C	C	C	C	C	C	C	C	C	C	Y	C	C	C	Y	C	C	C	C	Y	Y	C	C	T	C	C	C	C	C
S1A_413549060	G/A	1A	413549060	+	G	G	G	G	G	G	G	G	R	G	R	G	G	G	G	G	G	G	G	R	G	G	G	G	G	R	G	G	G	G	G	R	G	G	G	G	G	G	G	G	G	G	G	G	G
S1A_416814315	A/G	1A	416814315	+	A	A	A	A	A	A	A	R	A	A	A	A	A	A	A	A	R	A	A	A	R	A	A	A	A	A	R	A	A	A	A	A	R	A	A	A	A	A	A	A	A	A	A	A	A
S1A_418141909	G/A	1A	418141909	+	A	A	A	A	A	A	A	A	A	G	A	A	A	A	A	A	A	A	G	A	A	G	A	A	A	A	G	G	G	A	G	G	G	G	A	A	G	A	G	G	G	G	G	G	G
S1A_420714843	A/C	1A	420714843	+	A	M	M	A	A	A	A	A	A	A	A	M	A	A	A	A	A	A	M	A	A	A	A	A	A	A	A	A	A	A	A	A	A	A	A	A	A	A	A	A	A	M	A	A	A
S1A_421353785	G/C	1A	421353785	+	G	S	G	G	G	G	S	G	G	G	G	G	S	G	S	G	G	G	S	G	G	G	S	S	G	G	G	G	G	G	G	G	G	G	G	G	G	G	G	G	G	G	G	G	G
S1A_422503150	C/T	1A	422503150	+	C	C	C	C	C	C	C	C	C	C	C	C	C	C	C	C	C	C	C	C	Y	C	C	C	C	Y	C	C	Y	C	C	C	C	C	Y	C	C	C	C	C	Y	Y	C	C	C
S1A_422503162	G/C	1A	422503162	+	G	G	G	G	G	G	G	G	G	G	G	G	G	G	G	G	G	G	G	G	S	G	G	G	G	S	G	G	S	G	G	G	G	G	S	G	G	G	G	G	S	S	G	G	G
S1A_425302784	G/A	1A	425302784	+	G	A	G	G	G	G	G	G	G	G	G	G	G	G	G	G	G	G	G	G	G	G	G	G	R	G	G	G	R	G	G	R	G	A	G	G	G	G	R	G	R	G	G	G	R
S1A_428368211	T/A	1A	428368211	+	W	W	T	W	T	T	T	T	T	W	T	T	W	T	T	W	T	T	W	T	T	T	T	W	T	T	T	T	W	T	T	T	T	T	T	T	W	T	W	T	T	T	T	T	T
S1A_430833902	G/A	1A	430833902	+	A	A	A	A	A	A	A	A	A	A	G	A	A	A	A	A	A	A	G	A	A	G	A	A	A	A	G	G	G	G	G	G	G	G	G	G	G	G	G	G	G	G	G	G	G
S1A_431158283	G/T	1A	431158283	+	G	G	G	G	G	G	K	G	G	G	G	G	G	G	G	G	G	G	G	G	G	G	K	G	G	G	G	K	G	G	G	G	G	G	G	G	G	G	G	G	T	G	G	G	G
S1A_434821134	T/C	1A	434821134	+	T	T	T	T	T	T	T	T	T	T	T	T	T	T	T	T	T	T	T	T	T	T	T	T	T	T	T	T	T	T	C	C	T	C	T	T	C	T	C	T	C	T	C	T	C
S1A_440518204	C/T	1A	440518204	+	Y	C	C	C	C	C	C	C	C	C	C	C	C	C	C	C	C	C	C	C	C	C	Y	Y	C	C	C	C	C	C	C	C	Y	C	C	Y	C	C	C	C	C	Y	C	C	C
S1A_440518255	C/T	1A	440518255	+	Y	C	C	C	C	C	C	C	C	C	C	C	C	C	C	C	C	C	C	C	C	C	Y	Y	C	C	C	C	C	C	C	C	Y	C	C	Y	C	C	C	C	C	Y	C	C	C
S1A_441523675	A/C	1A	441523675	+	A	A	A	A	A	A	A	A	A	A	A	A	A	A	A	A	A	M	A	A	A	A	A	A	A	A	M	A	A	A	M	M	A	A	A	M	A	A	M	A	A	A	A	A	A
S1A_441523703	G/C	1A	441523703	+	G	G	G	G	G	G	G	G	G	G	G	G	G	G	G	G	G	S	G	G	G	G	G	G	G	G	S	G	G	G	S	S	G	G	G	S	G	G	S	G	G	G	G	G	G
S1A_441523720	A/T	1A	441523720	+	A	A	A	A	A	A	A	A	A	A	A	A	A	A	A	A	A	W	A	A	A	A	A	A	A	A	W	A	A	A	W	W	A	A	A	W	A	A	W	A	A	A	A	A	A
S1A_444894641	C/T	1A	444894641	+	C	C	C	C	C	C	C	C	C	C	C	C	C	Y	C	C	C	C	C	C	C	C	T	C	C	C	C	Y	C	C	C	C	C	Y	C	C	C	C	C	Y	C	Y	C	C	C
S1A_445949395	G/A	1A	445949395	+	G	A	G	A	A	A	G	G	A	A	G	A	A	A	A	A	A	A	G	A	A	G	A	A	A	A	G	G	G	G	G	G	G	G	G	R	G	G	G	G	G	G	G	G	G
S1A_447194472	G/C	1A	447194472	+	G	G	G	S	G	G	G	G	G	G	G	G	G	G	G	G	G	G	G	G	G	G	S	G	S	G	G	G	S	G	G	G	S	G	G	S	G	G	S	G	G	G	G	G	G
S1A_449436485	T/A	1A	449436485	+	A	T	A	T	T	T	A	A	T	T	A	T	T	T	T	T	T	T	A	T	T	A	T	T	T	T	A	A	A	A	T	T	A	T	A	A	T	A	T	A	T	A	T	A	T
S1A_449436486	C/T	1A	449436486	+	T	C	T	C	C	C	T	T	C	C	T	C	C	C	C	C	C	C	T	C	C	T	C	C	C	C	T	T	T	T	C	C	T	C	T	T	C	T	C	T	C	T	C	T	C
S1A_453393831	A/G	1A	453393831	+	A	G	A	G	G	G	A	A	G	A	A	G	G	G	G	G	G	G	A	G	G	A	G	G	G	G	A	A	A	A	A	A	A	A	A	A	A	A	A	A	A	A	A	A	A
S1A_453396260	A/G	1A	453396260	+	A	G	A	G	G	G	A	A	G	A	A	G	G	G	G	G	G	G	A	G	G	A	G	G	G	G	A	A	A	A	A	A	A	A	A	A	A	A	A	A	A	A	A	A	A
S1A_461319900	A/G	1A	461319900	+	A	A	R	A	R	A	A	A	R	A	A	A	A	A	R	R	A	R	A	A	A	R	R	A	A	R	R	A	R	A	A	A	A	A	A	A	A	A	A	A	A	A	A	A	A
S1A_462675373	A/T	1A	462675373	+	A	A	A	A	W	A	W	A	A	A	A	A	A	A	A	A	A	A	A	A	A	A	A	W	A	A	A	A	A	A	A	A	A	A	A	A	A	A	W	A	W	A	A	A	T
S1A_463807214	A/G	1A	463807214	+	A	A	A	G	G	G	A	A	G	A	A	A	A	A	A	A	A	A	A	A	A	A	A	A	A	G	A	A	A	A	A	A	A	A	A	A	A	A	A	A	A	A	A	A	A
S1A_464322065	T/C	1A	464322065	+	T	T	T	C	C	T	T	T	C	T	T	T	T	T	T	T	T	T	T	T	T	T	T	T	T	C	T	T	T	T	T	T	T	T	T	T	T	T	T	T	T	T	T	T	T
S1A_464403049	C/G	1A	464403049	+	C	C	C	G	G	G	C	C	G	C	C	C	C	C	C	C	C	C	C	C	C	C	C	C	C	G	C	C	C	C	C	C	C	C	C	C	C	C	C	C	C	C	C	C	C
S1A_473343067	A/G	1A	473343067	+	A	A	A	A	A	A	A	A	A	A	A	A	R	A	A	A	A	R	A	A	A	A	A	A	A	A	G	A	A	A	R	R	A	A	A	R	A	A	R	A	A	A	A	A	A
S1A_473437818	G/C	1A	473437818	+	G	G	G	G	G	G	G	G	G	G	G	G	G	G	G	G	G	S	G	G	G	G	G	G	G	G	G	G	G	G	G	S	G	G	G	G	G	G	G	G	G	G	S	G	G
S1A_473437819	G/A	1A	473437819	+	G	G	G	G	G	G	G	G	G	G	G	G	G	G	G	G	G	R	G	G	G	G	G	G	G	G	G	G	G	G	G	R	G	G	G	G	G	G	G	G	G	G	R	G	G
S1A_473437824	G/T	1A	473437824	+	G	G	G	K	G	G	K	G	G	G	G	G	G	G	G	G	K	G	G	G	G	K	G	K	G	K	G	G	G	K	G	G	G	K	G	G	G	G	G	G	G	G	G	G	G
S1A_473437826	C/A	1A	473437826	+	C	C	C	C	C	C	C	C	C	C	C	C	C	C	C	C	C	M	C	C	C	C	C	C	C	C	C	C	C	C	C	M	C	C	C	C	C	C	C	C	C	C	M	C	C
S1A_473437836	C/T	1A	473437836	+	C	C	C	Y	C	C	Y	C	C	C	C	C	C	C	C	C	Y	C	C	C	C	Y	C	Y	C	Y	C	C	C	Y	C	C	C	Y	C	C	C	C	C	C	C	C	C	C	C
S1A_473437849	G/C	1A	473437849	+	G	G	G	S	G	G	S	G	G	G	G	G	G	G	G	G	S	G	G	G	G	S	G	S	G	S	G	G	G	S	G	G	G	S	G	G	G	G	G	G	G	G	G	G	G
S1A_473850327	G/T	1A	473850327	+	G	K	G	G	G	G	G	G	G	G	G	G	G	T	G	G	G	K	G	G	G	G	G	G	G	G	K	G	G	G	K	G	G	G	G	T	G	G	G	G	G	G	G	G	G
S1A_478973333	G/A	1A	478973333	+	G	G	R	G	A	G	R	G	G	G	G	G	G	G	G	G	G	G	A	R	R	G	G	R	G	G	G	G	G	G	G	G	G	G	G	G	R	G	G	G	G	G	G	G	G
S1A_482609052	A/G	1A	482609052	+	A	A	A	A	A	A	A	A	R	A	R	R	A	A	R	A	R	G	R	A	A	A	A	A	R	A	A	A	G	A	A	A	A	A	A	A	A	A	A	A	A	A	A	R	A
S1A_482609092	C/T	1A	482609092	+	C	C	C	C	C	C	C	C	C	C	C	C	C	C	C	C	C	C	C	C	T	C	C	C	C	C	T	C	C	C	C	C	C	C	C	C	C	C	C	C	C	Y	C	C	Y
S1A_483300665	T/C	1A	483300665	+	T	T	T	T	T	T	Y	T	T	T	T	T	T	T	T	T	T	T	T	T	T	T	T	Y	T	T	T	T	T	T	T	T	T	T	Y	T	T	Y	T	T	T	T	T	T	T
S1A_483300667	G/A	1A	483300667	+	G	G	G	G	G	G	R	G	G	G	G	G	G	G	G	G	G	G	G	G	G	G	G	R	G	G	G	G	G	G	G	G	G	G	R	G	G	R	G	G	G	G	G	G	G
S1A_483683816	T/C	1A	483683816	+	T	T	T	Y	T	T	T	T	T	T	T	T	T	T	T	T	T	T	T	T	Y	T	Y	Y	Y	Y	T	T	T	C	C	C	T	C	T	T	C	T	C	T	C	Y	T	T	C
S1A_483683836	G/A	1A	483683836	+	G	G	G	G	G	G	G	G	G	G	G	G	G	G	G	G	G	G	G	G	G	G	G	G	G	G	G	G	G	G	A	A	G	A	G	G	A	G	A	G	A	G	G	G	A
S1A_484116990	G/A	1A	484116990	+	G	G	R	G	G	G	G	G	G	G	G	G	G	G	R	R	G	G	G	G	G	R	A	A	A	G	G	R	G	G	R	G	G	G	G	G	G	G	G	G	R	G	G	G	G
S1A_484117019	T/C	1A	484117019	+	T	T	Y	T	T	T	T	T	T	T	T	T	T	T	Y	Y	T	T	T	T	T	Y	C	C	C	T	T	Y	T	T	Y	T	T	T	T	T	T	T	T	T	Y	T	T	T	T
S1A_484117026	A/G	1A	484117026	+	A	A	R	A	A	A	A	A	A	A	A	A	A	A	R	R	A	A	A	A	A	R	G	G	G	A	A	R	A	A	R	A	A	A	A	A	A	A	A	A	R	A	A	A	A
S1A_488589951	T/C	1A	488589951	+	T	T	T	T	C	T	T	T	T	T	C	T	T	T	T	T	T	T	C	T	T	T	C	C	C	T	T	T	T	C	T	T	T	T	C	T	T	C	T	T	T	T	T	T	T
S1A_489044071	A/T	1A	489044071	+	A	A	W	W	A	A	T	W	A	A	A	A	T	A	A	A	A	A	A	A	A	A	A	A	A	A	A	A	A	W	W	W	A	A	A	A	A	A	W	A	A	A	A	A	A
S1A_489787181	G/C	1A	489787181	+	G	G	G	G	G	G	G	G	G	G	G	G	G	G	G	G	G	G	G	G	G	G	G	G	G	G	G	G	G	G	S	S	G	G	G	G	G	G	G	G	G	G	G	G	G
S1A_489787197	C/T	1A	489787197	+	C	C	C	C	C	C	C	C	C	C	C	C	C	C	C	C	C	C	C	C	C	C	C	C	C	C	C	C	C	C	Y	Y	C	C	C	C	C	C	C	C	C	C	C	C	C
S1A_489787198	A/G	1A	489787198	+	A	A	A	A	A	A	A	A	A	A	A	A	A	A	A	A	A	A	A	A	A	A	A	A	A	A	A	A	A	A	R	R	A	A	A	A	A	A	A	A	A	A	A	A	A
S1A_492810208	C/G	1A	492810208	+	C	C	C	C	C	C	C	C	C	C	C	C	C	C	C	C	C	C	C	C	C	C	C	C	C	C	C	C	C	C	C	C	C	C	C	C	C	C	C	C	C	C	C	C	C
S1A_494824059	A/G	1A	494824059	+	A	A	A	R	A	A	A	A	A	A	A	A	R	R	A	R	A	R	A	A	A	R	A	A	A	R	A	A	A	A	R	R	A	R	A	A	A	A	A	A	R	A	R	A	A
S1A_496336380	C/G	1A	496336380	+	C	C	C	G	G	G	C	C	C	C	C	C	C	C	C	C	C	C	C	C	C	C	C	C	C	G	C	C	C	C	G	G	C	G	C	C	G	C	G	C	G	C	C	C	G
S1A_496853930	A/G	1A	496853930	+	A	A	A	G	G	G	A	A	A	G	A	A	A	A	A	A	A	A	A	A	A	A	A	A	A	G	A	A	A	A	G	G	A	G	A	A	G	A	G	A	G	A	A	A	G
S1A_500192681	C/A	1A	500192681	+	C	C	C	C	C	C	M	C	C	C	M	C	C	C	A	A	C	C	C	M	C	C	M	C	C	C	C	C	C	C	C	A	C	M	C	C	C	C	C	C	C	C	C	C	A
S1A_500193520	G/T	1A	500193520	+	G	K	G	G	G	G	G	G	G	G	G	G	G	G	G	G	K	G	G	G	G	G	G	G	G	G	G	G	G	G	G	G	G	G	G	G	G	G	T	G	G	G	G	G	G
S1A_500193531	C/A	1A	500193531	+	C	C	C	C	C	C	A	M	A	C	C	C	C	C	C	C	C	C	C	C	C	C	A	A	C	C	C	A	C	A	A	C	C	C	A	C	C	M	C	A	M	M	C	A	A
S1A_500193540	C/A	1A	500193540	+	C	C	C	C	A	C	C	M	C	C	M	M	C	C	C	C	C	C	A	M	C	C	C	C	M	C	C	C	C	C	C	C	C	C	C	C	C	C	C	C	C	C	C	C	C
S1A_500195173	C/A	1A	500195173	+	A	C	C	C	M	C	C	C	C	C	M	C	C	C	C	C	C	C	C	C	C	C	C	C	C	C	C	C	C	C	C	C	M	M	C	C	C	C	C	C	C	C	C	C	C
S1A_500195174	C/A	1A	500195174	+	C	C	C	M	C	C	C	C	C	C	C	C	C	C	C	C	C	C	C	C	C	C	C	C	C	C	C	C	C	C	C	C	C	M	M	C	C	C	C	C	C	M	C	C	C
S1A_500195176	T/A	1A	500195176	+	T	T	T	T	W	T	T	T	T	T	T	T	T	T	T	T	T	T	T	T	T	T	T	T	T	T	T	W	T	T	T	T	T	W	T	W	T	T	T	T	T	T	T	T	T
S1A_500195177	A/T	1A	500195177	+	A	A	A	A	A	A	A	A	W	A	A	A	A	A	A	A	A	W	W	A	A	A	A	A	W	A	A	A	A	A	A	A	A	A	A	A	A	A	A	W	A	W	A	A	A
S1A_500195182	C/A	1A	500195182	+	C	C	C	C	C	C	C	C	C	C	C	C	C	C	C	C	C	C	C	C	C	C	C	C	C	C	C	C	C	C	C	C	M	C	M	C	C	C	C	C	C	C	C	C	C
S1A_500195194	G/T	1A	500195194	+	G	G	G	G	G	G	G	G	G	G	G	G	G	G	G	G	G	G	G	G	G	G	K	G	K	G	G	G	T	G	G	G	G	K	G	G	G	G	G	G	G	G	G	T	K
S1A_500195195	T/A	1A	500195195	+	T	T	T	T	W	T	T	T	W	T	T	T	T	T	T	T	T	T	T	T	T	T	T	T	T	T	T	T	T	T	T	T	T	T	T	T	T	T	T	T	T	T	W	T	W
S1A_500195204	C/T	1A	500195204	+	C	C	C	Y	C	C	C	C	C	C	C	C	C	C	C	C	C	C	C	C	C	C	C	C	C	C	C	C	C	C	C	C	C	C	C	C	C	Y	T	C	C	Y	C	C	C
S1A_500195205	A/T	1A	500195205	+	A	A	W	W	A	A	A	A	A	A	A	A	A	A	A	W	A	A	A	A	A	A	W	A	A	A	A	A	A	A	A	A	A	A	A	A	A	A	A	A	A	A	A	A	A
S1A_500195213	G/T	1A	500195213	+	G	G	G	G	G	G	G	G	G	T	G	G	G	G	G	K	G	G	G	G	G	T	G	G	G	G	G	G	G	G	G	G	G	G	G	G	G	G	G	G	G	G	G	G	G
S1A_500324255	A/G	1A	500324255	+	A	A	A	A	A	A	A	A	G	A	A	A	G	A	A	A	A	A	A	A	A	A	A	R	R	A	A	A	A	A	A	A	G	A	G	A	A	A	A	A	A	A	A	A	R
S1A_500324270	A/G	1A	500324270	+	A	A	A	A	A	A	A	A	G	A	A	A	G	A	A	A	A	A	A	A	A	A	A	R	R	A	A	A	A	A	A	A	G	A	G	A	A	A	A	A	A	A	A	A	R
S1A_501334554	C/G	1A	501334554	+	C	C	C	C	C	C	C	C	C	C	C	C	C	C	C	C	C	C	C	C	C	C	C	C	S	C	C	C	C	C	S	C	C	C	C	C	C	C	C	C	C	C	C	S	C
S1A_501334580	T/C	1A	501334580	+	T	T	T	T	Y	T	T	T	C	Y	T	T	T	T	Y	T	T	C	T	T	T	T	T	T	Y	T	T	T	T	T	T	T	T	T	T	T	T	T	T	T	T	T	T	T	T
S1A_501357787	G/C	1A	501357787	+	G	G	G	S	G	G	G	G	G	G	G	G	G	G	G	G	G	S	G	G	G	G	G	G	G	G	G	S	S	G	G	S	G	G	G	G	G	G	G	G	S	G	G	G	G
S1A_501567652	T/C	1A	501567652	+	T	T	T	T	T	T	T	T	C	T	T	T	T	T	T	T	T	T	T	T	T	T	T	T	T	T	T	T	T	T	T	T	T	T	T	T	T	T	T	T	T	T	T	T	T
S1A_502154090	A/G	1A	502154090	+	A	A	A	A	A	A	A	A	A	A	A	A	A	A	A	A	A	R	A	A	A	A	A	A	A	A	A	A	A	A	R	A	A	A	A	R	A	A	R	A	A	A	A	A	A
S1A_502154129	G/A	1A	502154129	+	G	G	G	G	G	G	G	G	G	G	G	G	G	G	G	G	G	R	G	G	G	G	G	G	G	G	G	G	G	G	R	G	G	G	G	R	G	G	R	G	G	G	G	G	G
S1A_502154144	C/A	1A	502154144	+	C	C	C	C	C	C	C	C	C	C	C	C	C	C	C	C	C	M	C	C	C	C	C	C	C	C	C	C	C	C	M	C	C	C	C	M	C	C	M	C	C	C	C	C	C
S1A_502388862	C/T	1A	502388862	+	C	C	C	Y	C	C	C	C	C	T	C	C	C	C	C	C	C	C	C	C	C	C	C	C	C	T	C	C	C	C	C	C	C	C	C	C	C	C	C	C	C	C	C	C	C
S1A_504159973	G/A	1A	504159973	+	G	G	G	A	G	G	G	G	G	R	G	G	G	G	G	G	G	G	G	G	G	G	G	G	G	A	G	G	G	G	G	G	G	G	G	G	G	G	G	G	G	G	G	G	G
S1A_505625204	G/A	1A	505625204	+	A	G	G	G	G	G	G	G	G	G	G	G	G	G	G	G	R	G	G	A	G	G	G	G	G	G	G	G	G	R	G	G	G	G	G	G	G	G	G	G	G	G	G	R	G
S1A_505625210	A/G	1A	505625210	+	G	A	A	A	A	A	A	A	A	A	A	A	A	R	A	A	R	A	A	G	A	A	A	A	A	A	A	A	A	R	A	A	A	A	A	R	A	A	A	A	A	A	R	R	A
S1A_505625228	G/A	1A	505625228	+	A	G	G	G	G	G	G	G	G	G	G	G	G	G	G	G	R	G	G	A	G	G	G	G	G	G	G	G	G	R	G	G	G	G	G	G	G	G	G	G	G	G	G	R	G
S1A_506015027	G/A	1A	506015027	+	G	R	G	R	G	R	G	G	G	G	G	R	G	G	G	G	G	G	R	G	G	G	R	G	R	G	G	G	G	G	G	R	G	G	R	G	G	G	G	G	G	G	G	G	G
S1A_506015041	G/C	1A	506015041	+	G	G	G	G	G	G	S	S	G	G	C	G	G	G	G	G	S	G	G	G	C	G	G	G	G	G	G	S	G	G	S	G	G	G	G	G	G	G	S	G	G	G	G	S	S
S1A_507801793	A/T	1A	507801793	+	A	A	A	A	A	A	A	A	A	A	W	A	A	A	A	A	T	A	A	A	A	A	W	W	W	A	A	A	W	A	A	A	A	W	A	A	A	A	A	A	W	A	A	A	W
S1A_508583100	A/G	1A	508583100	+	A	R	A	A	R	A	A	A	A	A	A	R	A	A	A	A	A	G	A	A	R	A	R	R	R	R	A	A	A	A	A	A	A	A	A	A	A	A	A	A	A	A	A	A	A
S1A_509348661	G/A	1A	509348661	+	G	A	G	G	G	G	G	G	G	G	G	G	G	G	G	G	G	G	G	G	G	G	G	G	G	G	G	G	G	R	A	G	G	A	G	G	G	G	G	G	R	G	G	G	G
S1A_509378669	T/C	1A	509378669	+	T	T	T	T	T	T	T	T	T	T	C	T	T	T	T	T	T	T	T	T	T	T	T	Y	T	T	T	T	T	T	T	T	T	T	C	T	T	Y	T	T	T	T	T	T	T
S1A_509544079	C/T	1A	509544079	+	T	C	C	C	C	C	C	C	C	C	C	C	C	C	C	C	C	C	C	C	C	C	C	C	C	C	C	C	C	T	C	C	T	C	T	C	C	Y	C	T	C	Y	C	T	C
S1A_510219296	G/T	1A	510219296	+	G	G	G	T	G	G	G	G	G	K	G	G	G	G	G	G	G	G	G	G	G	G	G	G	G	T	G	G	G	G	G	G	G	G	G	G	G	G	G	G	G	G	G	G	G
S1A_510978643	C/T	1A	510978643	+	T	C	C	C	C	C	Y	Y	C	Y	C	C	C	C	C	C	C	C	C	C	C	Y	C	C	C	C	T	C	C	C	C	C	C	C	C	Y	C	C	C	T	C	Y	T	C	C
S1A_510978647	C/T	1A	510978647	+	T	C	C	C	C	C	Y	Y	C	Y	C	C	C	C	C	C	C	C	C	C	C	Y	C	C	C	C	T	C	C	C	C	C	C	C	C	Y	C	C	C	T	C	Y	T	C	C
S1A_511758167	A/G	1A	511758167	+	A	A	A	G	A	A	A	A	A	A	A	A	A	A	A	A	A	A	A	A	A	A	A	A	A	G	A	A	A	A	A	A	A	A	A	A	A	A	A	A	A	A	A	A	A
S1A_511769682	A/C	1A	511769682	+	A	A	A	C	A	A	A	A	A	A	A	A	A	A	A	A	A	A	A	A	A	A	A	A	A	C	A	A	A	A	A	A	A	A	A	A	A	A	A	A	A	A	A	A	A
S1A_511932837	T/C	1A	511932837	+	T	T	T	C	T	T	T	T	T	T	T	T	T	T	T	T	T	T	T	T	T	T	T	T	T	C	T	T	T	T	T	T	T	T	T	T	T	T	T	T	T	T	T	T	T
S1A_512485147	A/C	1A	512485147	+	A	A	M	A	A	A	A	A	C	A	A	A	A	A	A	A	A	M	A	C	A	A	M	A	A	A	A	A	A	A	A	A	M	A	A	A	A	A	C	M	A	A	C	A	A
S1A_512623047	T/C	1A	512623047	+	T	T	T	C	T	T	T	T	T	T	T	T	T	T	T	T	T	T	T	T	T	T	T	T	T	C	T	T	T	T	T	T	T	T	T	T	T	T	T	T	T	T	T	T	T
S1A_512880207	G/T	1A	512880207	+	G	G	G	K	K	G	G	G	G	K	G	G	G	G	G	G	G	G	G	G	G	G	G	G	G	G	G	G	G	G	G	G	G	G	G	G	G	G	G	G	G	G	G	G	G
S1A_512880222	G/C	1A	512880222	+	S	G	G	S	S	G	G	G	G	S	G	G	G	G	G	G	G	G	G	G	G	G	G	G	G	G	G	G	G	G	G	G	G	G	G	G	G	G	G	G	G	G	G	G	G
S1A_512920541	A/C	1A	512920541	+	A	A	A	C	A	A	A	A	A	A	A	A	A	A	A	A	A	A	A	A	A	A	A	A	A	C	A	A	A	A	A	A	A	A	A	A	A	A	A	A	A	A	A	A	A
S1A_512972476	C/G	1A	512972476	+	C	C	C	C	C	C	C	C	C	C	C	C	C	C	C	C	C	S	C	C	C	C	C	C	C	C	C	C	C	C	S	S	C	C	C	S	C	C	S	C	C	C	C	C	C
S1A_513079625	C/T	1A	513079625	+	C	C	C	T	C	C	C	C	C	C	C	C	C	C	C	C	C	C	C	C	C	C	C	C	C	C	C	C	C	C	C	C	C	C	C	C	C	C	C	C	C	C	C	C	C
S1A_513079635	G/C	1A	513079635	+	G	G	G	C	G	G	G	G	G	G	G	G	G	G	G	G	G	G	G	G	G	G	G	G	G	G	G	G	G	G	G	G	G	G	G	G	G	G	G	G	G	G	G	G	G
S1A_513102841	G/C	1A	513102841	+	G	G	G	C	G	G	G	G	G	G	G	G	G	G	G	G	G	G	G	G	G	G	G	G	G	C	G	G	G	G	G	G	G	G	G	G	G	G	G	G	G	G	G	G	G
S1A_513103303	T/C	1A	513103303	+	T	T	T	C	T	T	T	T	T	T	T	T	T	T	T	T	T	T	T	T	T	T	T	T	T	C	T	T	T	T	T	T	T	T	T	T	T	T	T	T	T	T	T	T	T
S1A_513955920	G/A	1A	513955920	+	G	G	G	A	G	G	G	G	G	G	G	G	G	G	G	G	G	G	G	G	G	G	G	G	G	A	G	G	G	G	G	G	G	G	G	G	G	G	G	G	G	G	G	G	G
S1A_514327733	G/A	1A	514327733	+	A	G	R	G	G	G	R	R	G	G	G	G	R	G	G	G	G	G	G	G	G	G	G	G	G	G	G	G	G	G	G	G	A	G	G	R	G	G	G	R	G	A	G	R	G
S1A_514346442	A/C	1A	514346442	+	A	A	A	C	A	A	A	A	A	A	A	A	A	A	A	A	A	A	A	A	A	A	A	A	A	C	A	A	A	A	A	A	A	A	A	A	A	A	A	A	A	A	A	A	A
S1A_514668665	A/G	1A	514668665	+	A	A	A	G	A	A	A	A	A	A	A	A	A	A	A	A	A	A	A	A	A	A	A	A	A	G	A	A	A	A	A	A	A	A	A	A	A	A	A	A	A	A	A	A	A
S1A_514802915	C/T	1A	514802915	+	C	C	Y	C	C	Y	C	C	C	C	C	C	C	C	Y	Y	C	C	C	Y	C	C	C	C	C	C	C	C	Y	Y	C	C	C	C	C	C	C	C	C	Y	C	C	C	C	C
S1A_514960176	A/T	1A	514960176	+	A	A	A	A	A	A	A	A	A	A	A	A	A	A	W	A	A	A	A	A	A	A	A	A	A	A	A	A	A	A	W	A	A	A	A	W	A	W	A	A	A	A	W	A	A
S1A_514960215	C/G	1A	514960215	+	C	C	C	S	C	C	C	C	C	C	C	C	C	C	C	C	C	C	C	C	C	C	C	C	C	G	C	C	C	C	C	C	C	C	C	C	C	C	C	C	C	C	C	C	C
S1A_518426198	T/A	1A	518426198	+	T	T	T	T	W	T	T	T	T	T	T	T	T	T	T	T	T	W	T	T	T	W	T	W	T	T	T	T	T	T	T	T	T	T	T	T	W	T	T	T	T	T	T	T	T
S1A_519090515	C/T	1A	519090515	+	C	T	C	C	T	T	C	C	C	Y	C	T	T	T	C	C	T	C	C	T	T	C	C	C	C	C	C	C	T	C	T	T	C	T	C	C	T	C	T	C	T	C	C	C	T
S1A_519164083	G/A	1A	519164083	+	G	G	A	A	G	G	G	G	A	G	A	G	G	G	G	G	G	G	G	G	G	A	G	A	G	G	A	A	G	A	G	G	G	G	A	G	G	A	G	G	G	G	G	G	G
S1A_521074674	A/G	1A	521074674	+	A	A	A	A	A	A	A	A	A	A	A	A	R	A	A	A	A	A	A	A	A	A	A	A	A	A	R	A	A	A	R	R	A	A	A	A	A	A	R	A	A	A	A	A	A
S1A_522154365	C/T	1A	522154365	+	C	T	Y	C	C	C	C	C	C	C	Y	C	C	C	C	C	C	C	C	C	C	C	C	C	Y	C	C	Y	T	C	C	C	C	C	C	C	C	C	C	C	C	C	C	C	Y
S1A_523623501	C/G	1A	523623501	+	C	S	C	C	S	C	C	C	C	C	S	S	C	C	S	S	C	C	C	C	S	C	C	S	C	C	C	C	C	C	C	C	C	C	C	C	C	C	S	C	C	C	C	S	C
S1A_523623503	T/C	1A	523623503	+	Y	Y	T	T	T	Y	T	T	T	T	T	T	T	T	T	T	Y	T	T	Y	Y	T	T	T	T	T	T	T	T	T	T	T	T	T	T	T	T	T	T	T	T	T	T	T	T
S1A_523904586	T/A	1A	523904586	+	T	W	T	T	W	T	T	T	W	T	T	W	T	W	T	T	W	W	W	W	W	T	T	T	T	W	T	T	T	T	T	T	T	T	T	T	T	T	T	T	T	T	W	T	T
S1A_523904587	C/G	1A	523904587	+	C	S	C	C	S	C	C	C	S	C	C	S	C	S	C	C	S	S	S	S	S	C	C	C	C	S	C	C	C	C	C	C	C	C	C	C	C	C	C	C	C	C	C	C	C
S1A_523904599	C/T	1A	523904599	+	C	Y	C	C	Y	C	C	C	Y	C	C	Y	C	Y	C	C	Y	Y	Y	Y	Y	C	C	C	C	Y	C	C	C	C	C	C	C	C	C	C	C	C	C	C	C	C	C	C	C
S1A_524231608	C/T	1A	524231608	+	C	C	C	C	C	C	C	C	C	C	Y	C	C	C	C	C	C	C	C	C	C	C	C	C	C	C	C	C	C	Y	C	C	C	C	T	C	C	Y	C	C	C	C	C	C	C
S1A_524231626	T/C	1A	524231626	+	T	T	T	T	T	T	T	T	T	T	Y	T	T	T	T	T	T	T	T	T	T	T	T	T	T	T	T	T	T	Y	T	T	T	T	C	T	T	Y	T	T	T	T	T	T	T
S1A_524231635	A/G	1A	524231635	+	A	A	A	A	A	A	A	A	A	A	R	A	A	A	A	A	A	A	A	A	A	A	A	A	A	A	A	A	A	R	A	A	A	A	G	A	A	R	A	A	A	A	A	A	A
S1A_524231659	A/G	1A	524231659	+	A	A	A	A	A	A	A	A	A	A	R	A	A	A	A	A	A	A	A	A	A	A	A	A	A	A	A	A	A	R	A	A	A	A	G	A	A	R	A	A	A	A	A	A	A
S1A_528306004	G/A	1A	528306004	+	G	G	R	G	A	R	A	G	G	G	G	G	G	R	G	G	G	R	R	G	G	G	G	R	G	G	G	G	G	G	R	G	G	G	G	R	G	G	G	G	G	G	R	G	G
S1A_528306006	A/G	1A	528306006	+	A	A	R	A	G	R	G	A	A	A	A	A	A	R	A	A	A	R	R	A	A	A	A	R	A	A	A	A	A	A	R	A	A	A	A	R	A	A	A	A	A	A	R	A	A
S1A_530604030	T/A	1A	530604030	+	T	T	T	T	T	T	T	T	T	T	W	T	T	A	T	T	T	T	T	T	T	T	T	T	T	T	T	T	T	T	T	A	T	T	T	T	T	T	T	T	T	T	T	T	T
S1A_533359140	A/G	1A	533359140	+	R	G	G	A	A	R	A	R	A	R	G	A	A	A	G	G	A	A	G	R	G	R	A	G	G	G	A	R	R	G	A	A	A	A	A	A	R	A	A	G	A	G	G	G	G
S1A_534418562	C/A	1A	534418562	+	C	C	C	C	C	C	C	C	C	C	C	C	C	C	C	C	C	C	C	C	C	C	C	C	C	C	C	C	C	C	M	C	C	C	C	C	M	C	C	C	C	C	C	C	M
S1A_534468527	C/G	1A	534468527	+	C	C	C	C	C	C	S	C	C	C	C	S	C	S	S	S	C	C	C	C	S	G	S	C	C	S	C	C	C	C	C	C	C	C	C	C	S	C	C	C	C	C	C	C	C
S1A_534474978	C/T	1A	534474978	+	C	C	C	C	C	C	C	C	C	C	C	C	C	Y	Y	Y	C	C	Y	C	Y	Y	C	Y	C	Y	C	C	C	C	C	C	C	C	C	C	Y	C	C	C	C	C	C	C	C
S1A_535865591	G/A	1A	535865591	+	G	G	R	G	G	G	G	G	G	G	G	G	G	G	G	G	G	G	G	G	G	G	G	G	R	G	G	A	R	G	G	G	G	G	G	G	G	G	G	G	G	G	G	G	R
S1A_537146555	G/C	1A	537146555	+	G	G	G	G	G	G	G	G	G	G	S	G	G	C	S	G	G	G	G	S	S	G	G	G	G	G	G	G	G	S	G	G	G	G	G	G	G	S	G	G	G	G	G	G	G
S1A_537152045	A/G	1A	537152045	+	A	A	A	A	A	A	A	A	A	A	A	A	G	A	A	A	A	R	A	A	R	A	A	A	A	A	R	A	A	A	A	R	A	A	A	R	A	A	R	A	A	A	A	A	A
S1A_538376192	G/A	1A	538376192	+	G	G	G	G	G	G	G	G	G	G	G	G	G	G	G	G	R	A	G	R	G	G	G	G	G	G	G	R	G	G	G	R	G	G	G	R	R	G	R	G	G	G	G	R	G
S1A_538376230	G/A	1A	538376230	+	G	G	G	G	G	G	G	G	G	G	G	G	G	G	G	G	R	A	G	R	G	G	G	G	G	G	G	R	G	G	G	R	G	G	G	R	R	G	R	G	G	G	G	R	G
S1A_541194249	T/C	1A	541194249	+	T	T	T	T	T	T	T	T	T	T	T	T	T	T	T	T	T	T	T	T	T	T	T	T	T	T	T	T	T	Y	T	T	T	T	T	T	T	T	T	Y	T	T	T	T	T
S1A_541352530	A/T	1A	541352530	+	A	W	A	W	A	A	A	A	A	W	A	A	A	A	W	A	W	A	A	A	A	A	A	A	A	A	A	A	A	W	W	W	A	W	A	A	A	W	A	A	W	A	A	A	W
S1A_542464615	T/G	1A	542464615	+	T	T	T	T	T	T	T	T	T	T	T	T	T	T	T	T	K	K	T	T	T	T	T	T	T	T	T	T	K	G	T	T	T	T	T	T	T	T	T	T	T	T	T	T	T
S1A_543518074	G/A	1A	543518074	+	G	G	G	G	G	G	G	G	G	G	G	G	R	G	G	G	G	R	G	G	G	G	G	G	G	G	R	G	G	G	R	R	G	G	G	R	G	G	R	G	G	G	G	G	G
S1A_543518075	C/G	1A	543518075	+	C	C	C	C	C	C	C	C	C	C	C	C	S	C	C	C	C	S	C	C	C	C	C	C	C	C	S	C	C	C	S	S	C	C	C	S	C	C	S	C	C	C	C	C	C
S1A_543730396	A/T	1A	543730396	+	A	A	A	A	A	A	A	A	A	W	A	A	A	A	A	A	T	W	A	A	A	A	A	T	W	A	A	A	A	A	T	A	A	A	A	A	A	A	A	A	A	A	A	A	A
S1A_544802257	C/T	1A	544802257	+	C	C	C	C	C	C	C	C	C	C	C	C	C	C	C	C	C	C	Y	C	C	C	C	C	C	C	C	C	C	C	C	Y	C	C	T	C	C	Y	Y	C	C	C	C	C	Y
S1A_545689007	A/T	1A	545689007	+	A	A	A	A	W	A	A	A	A	A	A	A	A	A	A	A	A	A	A	A	A	A	W	A	A	W	W	A	A	A	A	A	A	A	A	A	A	A	A	W	A	A	A	A	A
S1A_547721893	C/T	1A	547721893	+	C	C	C	C	C	C	C	C	C	C	C	C	C	C	C	C	C	C	Y	C	C	C	C	C	C	C	C	C	C	C	Y	C	C	Y	C	C	C	C	Y	C	C	C	C	C	C
S1A_549675189	T/C	1A	549675189	+	T	T	C	C	T	T	T	T	T	T	T	T	T	T	T	T	T	T	T	T	T	T	T	T	T	T	T	T	T	T	T	T	T	T	T	T	T	T	T	T	T	T	T	T	T
S1A_550193168	C/G	1A	550193168	+	C	C	C	C	G	G	G	G	C	C	C	G	G	C	C	C	G	G	C	G	G	C	G	G	G	G	G	C	G	C	G	G	C	G	C	C	G	C	G	C	G	C	C	C	G
S1A_550473944	G/A	1A	550473944	+	G	G	A	G	G	G	A	A	G	G	G	G	G	G	G	G	G	G	G	G	G	G	G	G	G	G	G	G	G	G	G	G	G	G	G	G	G	G	G	G	G	G	G	G	G
S1A_551287345	C/T	1A	551287345	+	C	C	C	C	C	C	C	C	C	C	C	T	C	C	C	C	C	Y	C	C	C	C	Y	C	C	C	Y	C	C	C	Y	C	C	C	C	T	C	C	Y	C	C	C	C	C	C
S1A_551287357	C/G	1A	551287357	+	C	C	C	C	C	C	C	C	C	C	C	G	C	C	C	C	C	S	C	C	C	C	S	C	C	C	S	C	C	C	S	C	C	C	C	G	C	C	S	C	C	C	C	C	C
S1A_551352175	G/A	1A	551352175	+	G	G	G	G	G	G	G	G	G	G	G	G	G	G	G	G	G	R	G	G	G	G	G	G	G	G	G	G	R	G	R	R	G	G	G	G	G	G	R	G	G	G	G	G	G
S1A_551352183	C/T	1A	551352183	+	C	C	C	C	C	C	C	C	C	C	C	T	C	C	C	C	C	C	C	C	C	C	Y	C	C	C	C	C	C	C	C	C	C	C	C	C	C	C	C	C	C	C	C	C	C
S1A_551715290	T/C	1A	551715290	+	T	Y	T	T	T	T	T	T	T	T	T	T	Y	Y	T	T	T	C	T	T	T	T	T	T	T	T	Y	T	T	T	T	Y	T	T	T	Y	T	T	C	T	T	T	T	T	T
S1A_551715291	A/G	1A	551715291	+	A	R	A	A	A	A	A	A	A	A	A	A	R	R	A	A	A	G	A	A	A	A	A	A	A	A	R	A	A	A	A	R	A	A	A	R	A	A	G	A	A	A	A	A	A
S1A_552084614	G/C	1A	552084614	+	G	G	G	G	G	G	G	S	G	G	G	G	G	G	G	G	G	G	G	G	G	G	G	S	G	G	G	G	G	G	S	G	G	G	G	G	S	G	G	G	G	G	G	G	G
S1A_552854524	T/C	1A	552854524	+	T	T	T	T	T	T	T	T	T	T	T	T	Y	T	T	T	T	T	T	T	T	T	T	T	T	T	C	T	T	T	Y	Y	T	T	T	T	T	T	T	T	T	T	T	T	T
S1A_552854574	A/T	1A	552854574	+	A	A	A	A	A	A	A	A	A	A	A	A	W	A	A	A	A	A	A	A	A	A	A	A	A	A	T	A	A	A	W	W	A	A	A	A	A	A	A	A	A	A	A	A	A
S1A_552854579	A/G	1A	552854579	+	A	A	A	A	A	A	A	A	A	A	A	A	R	A	A	A	A	A	A	A	A	A	A	A	A	A	G	A	A	A	R	R	A	A	A	A	A	A	A	A	A	A	A	A	A
S1A_553097860	G/A	1A	553097860	+	G	G	G	G	G	G	G	G	G	G	G	G	R	G	G	G	G	R	G	G	G	G	G	G	G	G	R	G	G	G	R	R	G	G	G	R	G	G	R	G	G	G	G	G	G
S1A_553097880	T/G	1A	553097880	+	T	T	T	T	T	T	T	T	T	T	T	T	K	T	T	T	T	K	T	T	T	T	T	T	T	T	K	T	T	T	K	K	T	T	T	K	T	T	K	T	T	T	T	T	T
S1A_553097890	G/C	1A	553097890	+	G	G	G	G	G	G	G	G	G	G	G	G	S	G	G	G	G	S	G	G	G	G	G	G	G	G	S	G	G	G	S	S	G	G	G	S	G	G	S	G	G	G	G	G	G
S1A_553097897	G/A	1A	553097897	+	G	G	G	G	G	G	G	G	G	G	G	G	R	G	G	G	G	R	G	G	G	G	G	G	G	G	R	G	G	G	R	R	G	G	G	R	G	G	R	G	G	G	G	G	G
S1A_553314045	C/G	1A	553314045	+	C	C	C	C	C	C	C	C	C	C	C	C	S	C	C	C	C	S	C	C	C	C	C	C	C	C	S	C	C	C	S	S	C	C	C	S	C	C	S	C	C	C	C	C	C
S1A_553417545	G/T	1A	553417545	+	G	T	T	G	G	G	T	T	T	T	T	G	G	T	T	T	G	G	T	G	G	T	G	G	G	G	G	T	G	T	G	G	T	G	T	T	G	T	G	T	G	T	T	T	G
S1A_553430814	C/A	1A	553430814	+	A	C	C	C	C	C	C	C	C	C	C	C	M	C	C	C	C	C	C	C	C	C	C	C	C	C	C	C	C	C	C	C	A	C	C	A	C	C	C	A	C	A	A	A	C
S1A_553455663	G/T	1A	553455663	+	G	G	G	G	K	G	G	G	G	T	G	G	G	G	G	G	K	T	T	T	G	T	G	K	K	G	T	T	G	G	G	G	G	G	G	G	G	G	G	G	G	G	G	K	G
S1A_553701284	A/G	1A	553701284	+	A	A	R	R	G	A	R	A	A	A	A	A	A	A	A	A	A	A	G	R	R	A	A	R	A	A	A	A	A	A	A	A	A	R	A	A	R	A	A	A	R	A	A	A	A
S1A_553701318	T/C	1A	553701318	+	T	T	Y	Y	C	T	Y	T	T	T	T	T	T	T	T	T	T	T	C	Y	Y	T	T	Y	Y	T	T	T	T	T	T	T	T	Y	T	T	Y	T	T	T	Y	T	Y	T	T
S1A_553898794	C/G	1A	553898794	+	G	C	C	C	C	C	C	C	C	C	C	C	C	C	C	C	C	C	C	C	C	C	C	C	C	C	C	C	C	C	C	C	G	C	C	G	C	C	C	G	C	G	G	G	C
S1A_554189983	G/A	1A	554189983	+	A	A	A	G	G	G	A	A	A	A	A	G	G	A	A	A	G	G	A	G	G	A	G	G	G	G	G	A	G	A	G	G	A	G	A	A	G	A	G	A	G	A	A	A	G
S1A_556210746	C/G	1A	556210746	+	C	C	C	S	C	C	S	S	C	C	S	S	C	C	C	C	C	C	C	C	C	C	S	C	C	C	C	C	C	C	C	C	C	C	C	C	C	C	C	C	C	C	C	C	C
S1A_556249285	G/A	1A	556249285	+	A	A	A	G	A	A	A	A	A	R	G	A	A	A	A	A	A	A	G	A	A	G	G	G	G	A	A	G	A	G	G	G	A	G	G	A	G	G	G	A	G	A	A	A	G
S1A_556312188	C/T	1A	556312188	+	C	C	C	C	C	C	C	C	C	C	C	C	Y	C	C	C	C	Y	C	C	C	C	C	C	C	C	Y	C	C	C	Y	Y	C	C	C	T	C	C	Y	C	C	C	C	C	C
S1A_556458184	T/C	1A	556458184	+	T	T	T	T	T	T	T	T	T	T	T	T	T	T	Y	Y	T	T	T	T	Y	T	T	T	T	T	T	T	T	T	T	T	T	T	T	T	Y	T	T	T	T	Y	Y	T	T
S1A_556888575	C/T	1A	556888575	+	C	C	C	C	C	C	C	C	C	C	C	C	Y	C	C	C	C	Y	C	C	C	C	C	C	C	C	Y	C	C	C	Y	Y	C	C	C	Y	C	C	Y	C	C	C	C	C	C
S1A_557132386	C/G	1A	557132386	+	C	C	C	C	C	C	C	C	C	C	C	C	S	C	C	S	C	S	C	C	C	C	C	C	C	C	S	C	C	C	S	S	C	C	C	S	C	C	S	C	C	C	C	C	C
S1A_557132390	C/A	1A	557132390	+	C	C	C	C	C	C	C	C	C	C	C	C	M	C	C	M	C	M	C	C	C	C	C	C	C	C	M	C	C	C	M	M	C	C	C	M	C	C	M	C	C	C	C	C	C
S1A_557134202	A/C	1A	557134202	+	A	A	C	M	A	A	A	A	A	A	A	A	A	A	A	A	A	A	A	A	A	M	M	A	A	A	A	M	A	M	A	A	A	A	A	A	M	A	M	A	A	A	A	A	C
S1A_557134239	C/A	1A	557134239	+	C	C	A	M	C	C	C	C	C	C	C	C	C	C	C	C	C	C	C	C	C	M	M	C	C	C	C	M	C	M	C	C	C	C	C	C	M	C	M	C	C	C	C	C	A
S1A_557677973	C/T	1A	557677973	+	C	T	C	T	C	C	C	C	C	C	C	C	Y	C	Y	Y	C	C	C	C	C	C	C	C	Y	C	C	C	C	C	C	C	Y	C	T	Y	C	C	C	C	C	C	C	Y	C
S1A_557923869	A/C	1A	557923869	+	A	A	A	A	A	A	A	A	A	A	A	A	M	A	A	A	A	M	A	A	C	A	A	A	A	A	C	A	A	A	A	M	A	A	A	C	A	A	M	A	A	A	A	A	A
S1A_557923877	C/T	1A	557923877	+	C	C	C	C	C	C	C	C	C	C	C	C	Y	C	C	C	C	Y	C	C	T	C	C	C	C	C	T	C	C	C	C	Y	C	C	C	T	C	C	Y	C	C	C	C	C	C
S1A_558128868	G/A	1A	558128868	+	G	G	R	R	R	G	R	G	G	G	G	G	G	G	G	G	G	G	A	G	G	G	G	R	G	G	G	G	G	G	G	G	G	G	G	G	G	G	G	G	A	G	G	G	G
S1A_558783034	C/T	1A	558783034	+	C	C	C	C	C	C	C	C	C	C	C	C	T	C	C	C	C	C	C	C	T	C	C	C	C	C	C	C	C	C	Y	T	C	C	C	Y	C	C	Y	C	C	C	Y	C	C
S1A_558804390	G/C	1A	558804390	+	G	S	G	G	G	G	S	G	G	S	G	G	S	G	S	G	G	S	S	G	G	G	G	G	S	G	G	G	G	G	G	S	G	G	G	G	G	G	S	G	G	G	G	G	G
S1A_558804391	T/C	1A	558804391	+	T	Y	T	T	T	T	Y	T	T	Y	T	T	Y	T	Y	T	T	Y	Y	T	T	T	T	T	Y	T	T	T	T	T	T	Y	T	T	T	T	T	T	Y	T	T	T	T	T	T
S1A_558946822	G/A	1A	558946822	+	G	G	R	R	G	G	R	G	G	G	G	G	G	G	G	G	G	G	R	G	G	G	G	G	G	G	G	G	G	G	G	G	G	G	A	G	G	R	G	G	G	G	G	G	G
S1A_560674157	A/T	1A	560674157	+	A	A	W	W	A	A	A	A	A	A	A	A	A	A	A	A	W	A	A	W	A	A	W	A	A	W	A	A	W	A	A	A	A	W	A	A	A	A	A	A	W	W	A	A	A
S1A_560674162	A/T	1A	560674162	+	A	A	A	W	A	A	A	A	A	A	A	A	W	A	A	A	A	A	A	A	A	A	A	A	A	A	A	A	A	A	W	A	A	A	A	A	A	W	W	A	W	A	A	A	A
S1A_560674183	G/C	1A	560674183	+	S	G	G	G	G	G	G	G	G	G	G	G	G	G	G	G	G	G	G	G	G	G	G	G	S	G	G	G	G	G	G	G	G	S	G	G	G	G	G	G	S	S	G	G	G
S1A_561054384	G/C	1A	561054384	+	C	G	G	G	G	G	G	G	G	G	G	G	G	S	G	G	G	G	G	G	G	G	G	G	G	G	S	S	G	G	G	G	G	G	G	G	G	G	G	G	G	G	G	G	G
S1A_561054392	T/C	1A	561054392	+	C	T	T	T	T	T	T	T	T	T	T	T	T	Y	T	T	T	T	T	T	T	T	T	T	T	T	Y	Y	T	T	T	T	T	T	T	T	T	T	T	T	T	T	T	T	T
S1A_562514513	G/A	1A	562514513	+	G	G	A	G	R	R	G	G	R	G	G	R	G	G	R	G	G	G	G	G	G	G	G	G	G	G	G	G	G	G	G	G	G	G	G	G	G	R	G	G	G	G	G	R	G
S1A_563185697	T/G	1A	563185697	+	T	G	T	T	T	T	T	T	T	K	T	T	T	K	T	T	T	T	T	T	T	K	K	T	K	T	K	T	T	T	T	T	T	T	T	T	T	T	T	T	T	T	T	G	T
S1A_563400879	A/G	1A	563400879	+	A	A	A	A	A	A	A	A	A	A	A	A	R	A	A	A	A	A	A	A	A	A	A	A	A	A	G	A	A	A	A	R	A	A	A	A	A	A	A	A	A	A	A	A	A
S1A_563500724	G/A	1A	563500724	+	R	G	G	G	G	R	G	G	G	G	G	G	R	G	G	G	G	G	G	G	G	R	R	G	G	G	G	G	G	G	G	R	R	G	G	G	R	R	G	G	G	G	G	G	G
S1A_564211687	T/C	1A	564211687	+	T	T	T	T	T	T	T	T	T	T	T	T	Y	Y	T	T	T	C	T	Y	C	T	T	T	T	T	Y	T	T	T	Y	Y	T	T	T	Y	Y	T	Y	T	T	T	T	T	T
S1A_565485851	T/C	1A	565485851	+	T	T	T	T	T	T	T	T	T	T	T	T	Y	T	T	T	T	T	T	T	T	T	T	T	T	T	C	T	C	T	T	T	T	T	T	T	T	T	T	T	T	T	Y	T	T
S1A_565512907	A/T	1A	565512907	+	A	A	A	A	A	A	A	A	A	A	A	A	W	A	A	A	A	A	A	A	A	A	A	A	A	A	T	W	W	A	A	A	A	A	A	A	A	A	A	A	A	A	T	A	A
S1A_565517364	C/T	1A	565517364	+	C	C	C	C	C	C	C	C	C	C	C	C	Y	C	C	C	C	C	C	C	C	C	C	C	C	C	T	C	T	C	C	C	C	C	C	Y	C	C	C	C	C	C	C	C	C
S1A_565971647	G/A	1A	565971647	+	G	G	G	G	G	G	G	G	G	G	A	G	G	G	G	G	G	G	G	G	G	G	G	G	G	G	G	G	G	A	G	G	G	G	A	G	G	R	G	G	G	G	G	G	G
S1A_566291448	G/A	1A	566291448	+	G	G	G	R	R	G	G	G	G	G	G	G	R	G	G	G	G	R	G	G	A	G	G	G	G	G	A	G	G	G	A	R	G	A	G	R	G	G	R	G	R	G	G	G	G
S1A_566291471	T/A	1A	566291471	+	T	T	T	W	W	T	T	T	T	T	T	T	W	T	T	T	T	W	T	T	A	T	T	T	T	T	A	T	T	T	A	W	T	A	T	W	T	T	W	T	W	T	T	T	T
S1A_566291476	T/C	1A	566291476	+	T	T	T	Y	Y	T	T	T	T	T	T	T	Y	T	T	T	T	Y	T	T	C	T	T	T	T	T	C	T	T	T	C	Y	T	C	T	Y	T	T	Y	T	Y	T	T	T	T
S1A_566321189	T/C	1A	566321189	+	C	C	C	C	T	T	C	C	C	C	T	T	T	C	C	C	T	T	C	T	T	C	C	C	C	C	Y	C	T	T	T	T	C	T	T	C	T	T	T	C	T	C	C	C	T
S1A_566649796	A/T	1A	566649796	+	T	A	A	A	A	W	W	A	A	T	A	A	T	W	A	A	A	W	A	A	A	A	A	A	A	A	A	A	A	A	W	W	T	A	A	T	A	A	A	T	A	T	A	W	A
S1A_566807856	T/C	1A	566807856	+	T	T	T	T	C	C	T	T	C	T	T	C	C	T	T	T	C	C	T	C	C	T	T	T	T	T	C	T	C	T	C	C	T	C	C	T	C	T	C	T	C	T	T	T	C
S1A_566807861	G/C	1A	566807861	+	G	G	G	G	G	S	G	G	G	G	G	S	G	G	G	G	G	S	G	G	G	G	G	G	G	G	G	G	G	G	S	S	G	S	G	G	G	G	G	G	G	G	G	G	G
S1A_566809375	T/G	1A	566809375	+	T	T	T	T	G	G	T	T	G	T	T	G	G	T	T	T	G	G	T	G	G	T	T	T	T	T	G	T	G	T	G	G	T	G	T	T	G	T	G	T	G	T	T	T	G
S1A_567393593	T/G	1A	567393593	+	T	T	T	T	G	G	T	T	T	T	T	G	G	T	T	T	G	G	T	G	G	T	T	T	T	T	G	T	G	T	G	G	T	G	T	T	G	T	G	T	G	T	T	T	G
S1A_567487615	C/T	1A	567487615	+	T	C	T	T	C	C	T	T	Y	C	T	C	C	C	C	C	C	C	T	C	C	C	C	C	C	T	C	C	C	T	C	C	T	C	T	T	C	T	C	T	C	T	T	T	C
S1A_567487747	C/A	1A	567487747	+	C	C	C	C	A	A	C	C	C	C	C	A	A	C	C	C	A	A	C	A	A	C	C	C	C	C	A	C	A	C	A	A	C	A	C	C	A	C	A	C	A	C	C	C	A
S1A_567586551	A/G	1A	567586551	+	A	A	A	A	A	A	A	A	A	A	G	A	A	A	A	A	A	A	A	A	A	A	G	G	G	A	A	A	A	G	A	A	A	A	G	A	A	G	A	A	A	A	A	A	A
S1A_567592514	G/C	1A	567592514	+	G	G	G	G	G	G	G	G	G	G	G	G	S	G	G	G	G	S	G	G	G	G	G	G	G	G	S	G	G	G	G	G	G	G	G	S	G	G	S	G	G	G	G	G	G
S1A_567858294	G/A	1A	567858294	+	R	G	G	G	G	R	G	G	G	G	G	G	G	G	G	G	G	G	G	G	G	G	G	G	R	G	G	G	G	G	G	G	G	G	G	R	G	G	A	G	G	R	G	R	G
S1A_567872403	C/T	1A	567872403	+	T	C	C	C	C	Y	C	C	C	Y	C	C	C	C	C	C	C	Y	C	C	Y	C	C	C	C	C	C	C	C	C	C	Y	C	C	C	C	C	C	T	C	C	C	C	C	C
S1A_567886110	C/T	1A	567886110	+	C	C	C	T	C	C	C	C	C	C	T	C	C	Y	C	C	C	C	C	C	C	C	T	T	T	T	C	C	C	T	C	C	C	C	T	C	C	T	C	C	C	C	C	C	C
S1A_567951727	T/C	1A	567951727	+	C	T	C	C	T	T	C	C	T	T	T	T	T	T	T	T	T	T	C	T	T	T	T	T	T	C	T	T	T	T	T	T	C	T	T	C	T	T	T	C	T	C	C	C	T
S1A_567951728	C/T	1A	567951728	+	T	C	T	T	C	C	T	T	C	C	C	C	C	C	C	C	C	C	T	C	C	C	C	C	C	T	C	C	C	C	C	C	T	C	C	T	C	C	C	T	C	T	T	T	C
S1A_567951729	G/C	1A	567951729	+	C	G	C	C	G	G	C	C	G	G	G	G	G	G	G	G	G	G	C	G	G	G	G	G	G	C	G	G	G	G	G	G	C	G	G	C	G	G	G	C	G	C	C	C	G
S1A_568577304	C/T	1A	568577304	+	C	T	C	C	C	C	C	C	C	T	C	C	C	Y	T	T	C	C	C	C	C	T	C	C	C	C	C	T	C	C	C	C	C	C	C	C	C	C	C	C	C	C	C	C	C
S1A_569483692	G/A	1A	569483692	+	G	G	G	G	G	G	G	G	G	G	G	G	G	G	G	G	G	G	G	G	G	G	A	A	A	G	G	G	G	G	G	G	G	G	G	G	G	G	G	G	G	G	G	G	G
S1A_569771077	G/T	1A	569771077	+	T	G	K	G	K	G	T	K	G	G	G	G	G	G	K	K	G	G	G	G	G	G	K	K	K	G	G	G	G	G	G	G	T	G	G	K	G	G	G	T	G	K	K	G	G
S1A_569771088	G/C	1A	569771088	+	C	G	S	G	S	G	C	S	G	G	G	G	G	G	S	S	G	G	G	G	G	G	S	S	S	G	G	G	G	G	G	G	S	G	G	S	G	G	G	C	G	S	S	G	G
S1A_569882258	C/T	1A	569882258	+	C	C	C	C	C	C	C	C	C	C	C	C	C	C	C	C	C	T	C	C	C	C	C	C	C	C	T	C	C	C	Y	T	C	C	C	T	C	C	T	C	C	C	T	C	C
S1A_570562056	A/G	1A	570562056	+	A	A	A	A	A	A	A	A	A	A	A	A	A	R	A	A	A	R	A	A	A	A	A	A	A	A	A	A	A	A	G	R	A	A	R	R	A	A	R	A	A	A	A	A	A
S1A_572648307	G/T	1A	572648307	+	G	K	G	G	G	G	G	K	G	G	K	G	G	G	G	G	G	G	G	K	G	G	G	G	T	G	G	K	K	G	G	G	G	G	G	G	G	G	G	G	G	G	G	G	T
S1A_573950057	G/A	1A	573950057	+	G	G	G	G	G	G	G	G	G	G	A	G	G	G	G	G	G	G	G	G	G	G	A	A	A	G	G	G	G	A	G	G	G	G	A	G	G	A	G	G	G	G	G	G	G
S1A_573968740	A/G	1A	573968740	+	A	A	A	A	A	A	A	A	A	A	G	A	A	A	A	A	A	A	A	A	A	A	G	G	G	A	A	A	A	G	A	A	A	A	G	A	A	G	A	A	A	A	A	A	A
S1A_573968745	G/A	1A	573968745	+	G	G	G	G	G	G	G	G	G	G	A	G	G	G	G	G	G	G	G	G	G	G	A	A	A	G	G	G	G	A	G	G	G	G	A	G	G	A	G	G	G	G	G	G	G
S1A_573989223	T/C	1A	573989223	+	T	T	T	T	T	T	T	T	T	T	C	T	T	T	T	T	T	T	T	T	T	T	C	C	C	T	T	T	T	C	T	T	T	T	C	T	T	C	T	T	T	T	T	T	T
S1A_574224034	G/A	1A	574224034	+	G	G	G	G	G	G	G	G	G	G	A	G	G	G	G	G	G	G	G	G	G	G	A	A	A	G	G	G	G	A	G	G	G	G	A	G	G	A	G	G	G	G	G	G	G
S1A_574224069	C/T	1A	574224069	+	C	C	C	C	C	C	C	C	C	C	T	C	C	C	C	C	C	C	C	C	C	C	T	T	T	C	C	C	C	T	C	C	C	C	T	C	C	T	C	C	C	C	C	C	C
S1A_574684997	G/A	1A	574684997	+	G	G	G	G	G	G	G	G	G	G	A	G	G	G	G	G	G	G	G	G	G	G	A	A	A	G	G	G	G	A	G	G	G	G	A	G	G	A	G	G	G	G	G	G	G
S1A_575064212	C/T	1A	575064212	+	C	C	C	C	C	C	C	C	C	C	C	C	Y	C	C	C	C	Y	C	C	Y	C	C	C	C	C	Y	C	C	C	Y	Y	C	C	C	C	C	C	C	C	C	C	C	C	C
S1A_575064217	A/G	1A	575064217	+	A	A	A	A	A	A	A	A	A	A	A	A	R	A	A	A	A	R	A	A	R	A	A	A	A	A	R	A	A	A	R	R	A	A	A	A	A	A	A	A	A	A	A	A	A
S1A_575125600	C/T	1A	575125600	+	C	C	C	C	T	T	C	C	C	C	C	C	C	C	C	C	C	C	C	C	C	C	C	C	C	C	C	C	C	C	T	T	C	T	C	C	T	C	T	C	T	C	C	C	T
S1A_577404168	A/G	1A	577404168	+	A	R	A	A	A	A	A	A	A	A	A	A	A	A	A	A	A	A	A	A	A	A	A	A	R	A	A	A	A	A	A	A	A	A	A	A	A	A	A	A	A	A	A	A	A
S1A_577999715	C/T	1A	577999715	+	T	C	C	C	C	C	C	C	C	C	C	T	T	C	C	C	T	T	C	T	T	C	C	C	C	C	T	C	T	C	C	C	C	C	C	C	C	C	C	C	C	C	C	C	C
S1A_578068639	C/A	1A	578068639	+	C	C	C	C	C	C	C	C	C	C	C	M	M	C	C	C	M	M	C	M	M	C	C	C	C	C	M	C	M	C	C	C	C	C	C	C	C	C	C	C	C	C	C	C	C
S1A_578455353	A/T	1A	578455353	+	W	A	A	A	A	A	A	A	A	A	A	W	A	A	W	A	A	W	W	A	A	A	A	W	A	T	A	A	A	A	A	A	A	W	A	A	A	A	A	A	A	W	A	A	A
S1A_578595223	T/G	1A	578595223	+	T	T	T	T	T	K	T	T	T	T	K	K	T	T	T	T	T	T	T	T	T	K	K	T	K	T	T	T	T	T	T	T	T	T	T	T	T	T	K	T	T	T	T	T	T
S1A_578595224	T/G	1A	578595224	+	T	K	T	T	T	K	T	T	T	T	T	T	T	G	T	K	T	T	T	T	T	T	T	K	T	T	K	K	T	T	T	K	T	T	T	T	T	T	K	T	T	K	T	T	T
S1A_578681424	G/A	1A	578681424	+	G	G	G	G	G	G	G	G	A	G	G	G	G	G	G	G	G	G	G	G	G	G	G	G	G	G	G	G	G	G	G	G	G	G	G	R	G	G	R	G	G	G	G	G	G
S1A_578681449	G/A	1A	578681449	+	G	G	G	G	G	G	G	G	A	G	G	G	G	G	G	G	G	G	G	G	G	G	G	G	G	G	G	G	G	G	G	G	G	G	G	R	G	G	R	G	G	G	G	G	G
S1A_578702533	G/T	1A	578702533	+	G	G	G	G	G	G	G	G	G	G	G	G	K	G	G	G	G	K	G	G	K	G	G	G	G	G	G	G	G	G	K	K	G	G	G	K	G	G	K	G	G	G	K	G	G
S1A_578702551	C/T	1A	578702551	+	C	C	C	C	C	C	C	C	C	C	C	C	Y	C	C	C	C	Y	C	C	Y	C	C	C	C	C	C	C	C	C	Y	Y	C	C	C	Y	C	C	Y	C	C	C	Y	C	C
S1A_579357144	A/G	1A	579357144	+	G	A	A	A	A	A	A	A	A	A	A	A	A	A	A	A	A	A	A	A	A	A	A	A	A	A	A	A	A	R	A	A	R	A	R	A	A	R	A	R	A	R	A	R	A
S1A_579357147	A/G	1A	579357147	+	G	A	A	A	A	A	A	A	A	A	A	A	A	A	A	A	A	A	A	A	A	A	A	A	A	A	A	A	A	R	A	A	R	A	R	A	A	R	A	R	A	R	A	R	A
S1A_580450098	T/A	1A	580450098	+	T	W	T	T	T	T	T	T	T	T	T	T	T	T	T	T	T	T	T	W	T	T	T	T	T	T	T	T	T	T	T	T	W	T	T	T	T	T	T	T	T	T	T	T	T
S1A_581340663	C/T	1A	581340663	+	C	Y	C	C	C	C	C	C	C	C	C	C	C	Y	C	C	C	Y	C	C	T	C	C	C	C	C	T	C	C	C	Y	Y	C	C	C	Y	C	C	Y	C	C	C	Y	C	C
S1A_581340692	G/A	1A	581340692	+	G	R	G	G	G	G	G	G	G	G	G	G	G	R	G	G	G	R	G	G	A	G	G	G	G	G	A	G	G	G	R	R	G	G	G	R	G	G	R	G	G	G	R	G	G
S1A_581467673	A/T	1A	581467673	+	A	A	A	A	W	A	A	A	A	A	A	A	A	A	W	A	A	A	A	A	A	W	A	W	A	A	W	A	A	A	A	A	A	W	A	W	A	A	A	A	A	A	A	A	A
S1A_581467679	G/T	1A	581467679	+	G	G	G	G	K	K	G	G	G	G	G	G	G	G	G	G	G	G	K	G	G	G	K	K	G	G	K	G	G	G	G	G	G	G	G	G	G	G	G	G	G	K	G	G	G
S1A_581616331	G/A	1A	581616331	+	G	G	G	G	G	R	G	G	G	G	G	G	G	G	G	G	G	G	G	G	G	G	G	G	G	G	G	G	G	G	G	G	R	G	A	G	G	R	G	G	G	G	G	G	G
S1A_581616338	T/C	1A	581616338	+	T	T	T	T	T	Y	T	T	T	T	T	T	T	T	T	T	T	T	T	T	T	T	T	T	T	T	T	T	T	T	T	T	Y	T	C	T	T	Y	T	T	T	T	T	T	T
S1A_586298232	G/A	1A	586298232	+	G	G	G	G	G	G	G	G	G	G	A	G	G	G	G	G	G	G	G	G	G	G	G	G	G	G	G	G	G	R	G	G	G	G	A	G	G	A	G	G	G	G	G	G	G
S1A_587009570	G/C	1A	587009570	+	G	G	G	G	S	G	G	G	G	G	G	G	G	G	G	G	G	G	S	G	S	G	G	G	G	G	G	G	G	G	G	G	G	G	G	G	G	S	G	G	G	S	S	G	G
S1A_589168354	C/T	1A	589168354	+	C	C	C	C	C	C	C	C	C	C	C	C	C	C	C	C	C	C	C	C	T	C	C	C	C	C	Y	C	C	C	T	C	C	C	C	C	C	C	C	C	C	C	Y	C	C
S1A_589632226	C/T	1A	589632226	+	C	Y	C	C	C	C	C	C	C	C	C	C	C	C	C	C	C	Y	C	C	C	C	C	C	C	C	C	C	C	C	C	C	C	C	C	C	C	C	Y	C	C	C	C	C	C
S1A_589681066	G/A	1A	589681066	+	G	R	G	G	G	G	G	G	G	G	G	G	G	G	G	G	G	G	G	G	G	G	G	G	G	G	R	G	G	G	R	R	G	G	G	R	G	G	R	G	G	G	R	G	G
S1A_589681074	C/G	1A	589681074	+	C	S	C	C	C	C	C	C	C	C	C	C	C	C	C	C	C	C	C	C	C	C	C	C	C	C	S	C	C	C	S	S	C	C	C	S	C	C	S	C	C	C	S	C	C
S1A_589681075	T/C	1A	589681075	+	T	Y	T	T	T	T	T	T	T	T	T	T	T	T	T	T	T	T	T	T	T	T	T	T	T	T	Y	T	T	T	Y	Y	T	T	T	Y	T	T	Y	T	T	T	Y	T	T
S1A_589681101	C/G	1A	589681101	+	C	S	C	C	C	C	C	C	C	C	C	C	C	C	C	C	C	C	C	C	C	C	C	C	C	C	S	C	C	C	S	S	C	C	C	S	C	C	S	C	C	C	S	C	C
S1A_589780402	G/A	1A	589780402	+	G	G	R	G	G	G	G	G	R	G	G	G	G	G	R	G	G	G	G	G	G	G	G	G	G	R	G	G	G	R	G	G	G	G	G	R	G	R	G	G	G	R	G	R	G
S1A_589780411	C/T	1A	589780411	+	C	C	Y	C	C	C	C	C	Y	C	C	C	C	C	Y	C	C	C	C	C	C	C	C	C	C	Y	C	C	C	Y	C	C	C	C	C	Y	C	Y	C	C	C	Y	C	Y	C
S1A_592829332	A/T	1A	592829332	+	A	A	A	A	A	A	A	A	A	A	A	W	A	A	A	A	W	A	A	A	A	A	W	A	A	A	A	A	A	A	A	A	A	A	A	A	A	W	A	A	A	A	A	A	A
S1A_592829344	G/A	1A	592829344	+	G	G	G	G	G	G	G	G	G	G	G	R	G	G	G	G	R	G	G	G	G	G	R	G	G	G	G	G	G	G	G	G	G	G	G	G	G	R	G	G	G	G	G	G	G
S1A_592829378	C/T	1A	592829378	+	C	C	C	C	C	C	C	C	C	C	C	Y	C	C	C	C	Y	C	C	C	C	C	Y	C	C	C	C	C	C	C	C	C	C	C	C	C	C	Y	C	C	C	C	C	C	C
S1A_593055817	A/G	1A	593055817	+	A	A	R	A	R	A	R	A	A	A	R	A	A	A	A	A	A	A	R	R	A	A	A	A	R	A	A	R	R	A	A	A	R	A	A	A	R	A	A	A	A	A	A	A	A
S1A_593473019	C/T	1A	593473019	+	C	C	C	Y	C	C	C	C	C	C	C	C	C	C	C	C	C	C	C	C	C	C	Y	C	C	C	C	C	C	C	C	C	Y	C	Y	C	C	Y	C	C	C	C	C	C	C
S1A_593592697	T/C	1A	593592697	+	T	T	T	C	T	T	T	T	T	T	T	T	T	T	T	T	T	T	C	T	T	T	T	T	T	T	T	T	T	T	T	T	T	T	T	T	T	T	T	T	T	T	T	Y	T
S1A_593592738	A/T	1A	593592738	+	A	A	A	T	A	A	A	A	A	A	A	A	A	A	A	A	A	A	T	A	A	A	A	A	A	A	A	A	A	A	A	A	A	A	A	A	A	A	A	A	A	A	A	W	A
S1A_593740781	G/A	1A	593740781	+	A	G	G	A	G	G	G	G	G	G	G	G	A	G	A	R	A	A	G	G	G	A	G	G	G	A	A	G	G	A	A	A	G	A	G	A	G	G	A	A	A	A	G	A	G
S1A_594032258	A/T	1A	594032258	+	T	A	A	T	A	A	A	A	T	A	A	T	A	A	A	A	T	A	A	T	A	A	T	A	A	A	A	A	A	T	A	A	A	T	A	A	T	A	A	T	T	T	A	T	A
S1A_594032264	G/T	1A	594032264	+	T	G	G	T	G	G	G	G	G	G	G	G	G	G	G	G	T	G	G	G	G	G	G	G	G	G	G	G	G	T	G	G	G	T	G	G	G	G	G	T	T	T	G	T	G
S1B_460466	C/T	1B	460466	+	Y	C	C	C	C	Y	C	C	C	C	C	C	C	C	T	Y	Y	C	C	C	C	T	C	C	C	C	C	C	C	Y	C	C	C	C	C	C	C	C	C	Y	C	T	C	T	C
S1B_460481	G/T	1B	460481	+	K	G	G	G	G	K	G	G	G	G	G	G	G	G	T	K	K	G	G	G	G	T	G	G	G	G	G	G	G	K	G	G	G	G	G	G	G	G	G	K	G	T	G	T	G
S1B_460484	G/A	1B	460484	+	R	G	G	G	G	R	G	G	G	G	G	G	G	G	A	R	R	G	G	G	G	A	G	G	G	G	G	G	G	R	G	G	G	G	G	G	G	G	G	R	G	A	G	A	G
S1B_1294208	A/T	1B	1294208	+	A	W	W	A	A	A	A	W	A	A	W	A	A	A	A	A	A	A	A	A	A	A	A	A	W	A	A	A	A	A	A	A	A	A	A	A	A	A	A	A	A	A	A	A	A
S1B_1511195	G/A	1B	1511195	+	A	G	A	G	G	A	A	A	A	A	A	A	A	A	A	A	A	A	G	A	A	G	G	G	G	A	A	G	A	A	G	G	A	G	A	A	G	A	G	A	G	A	G	G	G
S1B_1521020	C/T	1B	1521020	+	C	C	C	C	C	C	C	C	C	C	C	C	Y	C	C	C	C	Y	C	C	C	C	C	C	C	C	Y	C	C	C	Y	C	C	C	C	Y	C	C	C	C	C	C	C	C	C
S1B_2963585	C/T	1B	2963585	+	C	C	Y	T	C	C	C	C	C	C	C	C	C	C	Y	C	Y	C	C	C	C	Y	C	C	C	C	C	C	Y	C	C	C	Y	C	C	C	C	C	C	C	C	C	C	C	Y
S1B_2970526	A/G	1B	2970526	+	A	A	R	G	A	A	R	G	A	A	A	A	A	A	A	A	A	A	A	A	A	A	A	A	A	A	A	A	A	A	A	A	A	A	A	A	A	A	A	A	A	A	A	A	A
S1B_4964008	C/T	1B	4964008	+	Y	C	C	T	C	C	C	C	C	C	C	C	Y	C	C	C	C	Y	C	C	C	C	C	C	C	C	C	C	C	C	C	C	C	C	C	C	C	C	C	Y	C	C	Y	C	Y
S1B_7682284	T/A	1B	7682284	+	T	T	T	T	T	T	T	T	T	T	T	T	W	W	T	T	T	T	T	T	T	T	T	T	T	T	T	T	W	T	T	T	T	T	W	T	T	W	T	T	T	W	T	T	T
S1B_8762299	T/A	1B	8762299	+	T	T	W	T	T	T	T	W	T	T	W	T	T	T	T	T	T	W	T	T	T	W	T	T	W	T	T	T	T	T	T	W	T	T	T	T	T	T	T	T	T	T	A	T	W
S1B_9528307	G/C	1B	9528307	+	G	G	G	G	G	G	G	S	G	G	G	S	G	G	G	G	G	G	G	G	G	G	G	G	G	G	G	G	G	G	G	G	G	C	G	S	G	G	G	G	G	G	G	G	G
S1B_9594202	C/G	1B	9594202	+	C	C	C	C	G	S	S	C	C	C	S	C	C	C	C	C	C	C	S	C	C	C	C	C	C	C	C	C	C	C	C	S	C	S	C	C	S	C	C	S	C	C	C	S	C
S1B_9773395	T/C	1B	9773395	+	T	T	Y	T	T	T	T	T	T	T	T	T	C	T	T	T	Y	C	T	T	T	T	T	T	T	T	Y	Y	C	T	T	T	T	T	T	T	T	T	T	T	T	T	T	T	T
S1B_10444017	G/T	1B	10444017	+	G	G	G	K	K	G	G	G	G	G	G	G	G	G	K	K	G	G	G	G	G	K	G	G	G	K	G	G	G	G	G	G	G	K	G	G	G	G	G	G	K	G	G	G	G
S1B_10444037	A/C	1B	10444037	+	A	A	A	M	M	A	A	A	A	A	A	A	A	A	M	M	A	A	A	A	A	M	A	A	A	M	A	A	A	A	A	A	A	M	A	A	A	A	A	A	M	A	A	A	A
S1B_10590342	A/G	1B	10590342	+	G	A	R	A	A	A	A	R	A	A	G	A	A	R	A	A	A	A	A	R	A	A	A	A	R	A	A	A	A	R	A	A	A	A	A	A	R	A	A	A	A	R	A	A	A
S1B_10590360	A/G	1B	10590360	+	G	A	R	A	A	A	A	R	R	A	G	A	A	R	A	A	A	A	A	R	A	A	A	A	R	A	A	A	A	R	A	A	A	A	A	A	R	A	A	A	A	R	R	A	A
S1B_10590362	T/G	1B	10590362	+	G	T	K	T	T	T	T	K	T	T	G	T	T	K	T	T	T	T	T	K	T	T	T	T	K	T	T	T	T	K	T	T	T	T	T	T	K	T	T	T	T	K	T	T	T
S1B_10590366	G/A	1B	10590366	+	A	G	R	G	G	G	G	R	R	G	A	G	G	R	G	G	G	G	G	R	G	G	G	G	R	G	G	G	G	R	G	G	G	G	G	G	R	G	G	G	G	R	R	G	G
S1B_10590369	A/G	1B	10590369	+	G	A	R	A	A	A	A	R	R	A	G	A	A	R	A	A	A	A	A	R	A	A	A	A	R	A	A	A	A	R	A	A	A	A	A	A	R	A	A	A	A	R	R	A	A
S1B_10909830	A/T	1B	10909830	+	A	A	A	A	A	A	A	A	A	A	A	A	A	A	A	A	A	A	A	A	A	W	T	W	A	A	W	W	W	A	A	A	A	A	A	A	A	A	A	A	A	A	A	A	A
S1B_10956746	A/G	1B	10956746	+	A	G	A	A	A	A	A	A	A	A	G	A	A	A	A	A	A	G	A	A	A	A	A	A	A	A	A	G	A	G	A	A	A	A	G	A	A	A	A	A	A	A	A	A	A
S1B_12916073	C/T	1B	12916073	+	C	C	C	C	C	C	C	C	C	C	C	C	C	C	Y	Y	C	C	C	C	C	C	C	Y	C	C	C	Y	C	T	C	C	Y	C	C	C	C	C	C	C	C	C	C	C	C
S1B_12916086	T/G	1B	12916086	+	T	T	T	T	T	T	T	T	T	T	T	T	T	T	K	K	T	T	T	T	T	T	T	K	T	T	T	K	T	G	T	T	K	T	T	T	T	T	T	T	T	T	T	T	T
S1B_13280777	A/T	1B	13280777	+	A	A	W	A	A	A	A	A	W	A	A	A	A	A	A	A	W	W	A	A	A	A	A	A	W	A	A	A	A	A	W	A	A	A	A	A	W	A	A	A	A	A	A	A	A
S1B_15934307	C/T	1B	15934307	+	C	C	C	C	T	C	T	T	C	C	T	C	C	C	C	C	C	C	T	C	C	C	C	C	C	C	T	C	C	T	C	C	C	C	T	C	C	T	C	C	C	C	C	C	C
S1B_16382387	A/T	1B	16382387	+	A	A	A	A	A	A	A	A	A	A	W	A	A	A	A	A	A	A	A	W	A	A	A	A	A	A	A	A	A	A	W	A	A	A	A	A	A	A	A	A	A	A	A	A	A
S1B_16958438	G/A	1B	16958438	+	G	G	R	R	G	G	R	R	R	G	R	G	G	G	G	G	G	G	G	G	G	G	G	G	G	G	G	G	G	G	G	G	G	G	G	G	G	R	G	G	G	G	G	R	G
S1B_17743617	A/G	1B	17743617	+	A	A	A	A	A	A	A	A	A	A	A	A	A	A	A	A	A	A	A	A	A	A	A	A	A	A	A	A	A	A	G	A	A	R	A	A	R	A	R	A	G	A	A	A	A
S1B_18557803	C/T	1B	18557803	+	C	C	C	C	T	T	C	C	C	T	T	C	C	C	C	C	C	C	C	C	C	C	C	C	C	C	T	C	C	T	C	C	C	C	T	C	C	T	C	C	C	C	C	C	C
S1B_18632967	C/T	1B	18632967	+	C	C	C	C	C	C	C	C	C	Y	T	C	C	C	C	C	C	C	C	C	C	C	C	C	C	C	T	C	C	T	C	C	C	C	T	C	C	T	C	C	C	C	C	C	C
S1B_18706632	G/A	1B	18706632	+	G	G	G	G	G	G	G	G	G	G	G	G	G	G	G	G	G	G	G	G	G	G	G	G	G	G	G	G	G	G	G	G	R	G	R	G	G	R	G	G	G	G	G	G	G
S1B_19202678	G/C	1B	19202678	+	G	G	G	G	G	S	G	S	S	G	G	G	G	G	G	G	G	G	G	G	G	G	G	G	S	G	S	G	G	C	G	G	G	G	S	G	G	S	G	G	G	G	C	G	G
S1B_20431163	A/T	1B	20431163	+	A	A	W	A	A	A	A	A	W	A	A	A	A	A	A	A	W	A	A	A	A	A	A	A	A	A	A	A	A	W	W	A	A	A	A	A	A	A	A	A	A	A	A	A	A
S1B_20588460	A/T	1B	20588460	+	A	A	A	A	A	A	A	A	W	W	A	A	A	A	A	A	A	A	A	A	A	A	A	T	A	A	A	A	A	A	W	A	A	A	A	A	A	A	A	W	A	W	W	A	A
S1B_22618638	G/A	1B	22618638	+	A	G	A	A	A	G	A	A	A	G	G	G	R	G	R	A	G	G	A	G	G	A	A	A	A	G	G	A	G	G	G	G	A	G	G	A	G	G	G	A	G	A	A	A	G
S1B_22618679	T/A	1B	22618679	+	A	T	A	A	A	T	A	A	A	T	T	T	W	T	W	A	T	T	A	T	T	A	A	A	A	T	T	A	T	T	T	T	A	T	T	A	T	T	T	A	T	A	A	A	T
S1B_23816776	C/T	1B	23816776	+	C	C	Y	C	C	C	C	C	C	T	C	C	C	C	C	C	C	C	C	C	C	T	C	C	C	C	C	T	C	C	C	C	C	C	C	C	C	C	C	C	C	C	C	C	C
S1B_24918314	C/T	1B	24918314	+	C	C	C	Y	C	C	C	C	C	C	C	C	C	C	C	C	C	C	C	C	C	C	Y	Y	Y	C	C	C	C	C	C	C	Y	C	C	Y	C	C	C	T	C	Y	C	C	C
S1B_24918362	T/C	1B	24918362	+	T	T	Y	T	T	T	Y	Y	Y	T	Y	T	T	T	T	T	T	T	Y	T	T	T	T	T	T	T	T	T	T	Y	T	T	T	T	T	T	T	Y	T	T	T	T	T	C	T
S1B_24918376	A/G	1B	24918376	+	A	A	A	R	A	A	A	A	A	A	A	A	A	A	A	A	A	A	A	A	A	A	A	R	R	A	A	A	A	A	A	A	R	A	A	A	A	A	A	R	A	A	A	A	A
S1B_25287810	T/G	1B	25287810	+	T	T	T	T	T	T	T	T	T	T	T	T	T	T	T	T	T	T	T	T	T	T	T	T	T	T	T	T	T	T	T	T	T	T	T	T	K	T	K	T	K	T	T	T	K
S1B_26273087	G/A	1B	26273087	+	G	R	G	G	G	R	G	G	G	G	G	G	G	G	G	R	G	A	G	R	G	G	G	G	R	R	G	G	G	G	G	G	R	G	G	A	G	G	G	R	G	R	A	G	G
S1B_27050466	C/G	1B	27050466	+	C	C	C	C	C	S	G	C	C	C	C	C	C	C	C	C	C	C	C	C	C	C	C	C	C	C	C	C	C	C	C	C	C	C	C	C	C	C	C	C	C	S	C	C	C
S1B_28165782	G/A	1B	28165782	+	G	G	G	G	A	A	G	G	G	A	G	G	G	G	G	G	G	G	A	G	G	G	G	G	G	G	G	G	G	G	G	G	G	G	G	G	G	G	G	G	G	G	G	G	G
S1B_28244828	C/T	1B	28244828	+	C	C	T	C	C	C	C	Y	C	C	Y	C	C	C	C	C	C	C	C	C	C	C	C	C	Y	C	C	Y	Y	C	C	C	C	C	C	C	C	C	C	C	C	C	C	C	C
S1B_30616509	C/T	1B	30616509	+	C	C	C	C	T	T	C	C	C	C	C	C	C	C	C	C	C	C	T	C	C	C	C	C	C	C	C	C	C	C	C	C	C	C	C	C	C	C	C	C	C	C	C	C	C
S1B_34770225	A/G	1B	34770225	+	A	A	A	A	G	G	A	A	A	G	A	A	A	A	A	A	A	A	G	A	A	A	A	A	A	A	A	A	A	A	A	A	A	A	A	A	A	A	R	A	A	A	A	A	A
S1B_34951807	T/C	1B	34951807	+	T	T	T	T	Y	Y	T	T	T	T	T	T	T	T	T	T	T	T	Y	T	T	T	T	T	T	T	T	T	T	T	T	T	T	T	T	T	T	T	T	T	T	T	T	T	T
S1B_34951848	G/A	1B	34951848	+	G	G	G	G	R	R	G	G	G	G	G	G	G	G	G	G	G	G	R	G	G	G	G	G	G	G	G	G	G	G	G	G	G	G	G	G	G	G	G	G	G	G	G	G	G
S1B_35212240	T/A	1B	35212240	+	T	T	T	T	W	W	T	T	T	W	T	T	T	T	T	T	T	T	A	T	T	T	T	T	T	T	T	T	T	T	T	T	T	T	T	T	T	T	T	T	T	T	T	T	T
S1B_35212251	T/A	1B	35212251	+	T	T	T	T	W	W	T	T	T	W	T	T	T	T	T	T	T	T	A	T	T	T	T	T	T	T	T	T	T	T	T	T	T	T	T	T	T	T	T	T	T	T	T	T	T
S1B_36369126	A/G	1B	36369126	+	G	A	G	A	A	A	G	G	A	A	G	A	G	A	G	G	A	A	A	A	A	G	G	G	G	A	G	G	A	G	A	A	G	A	G	G	A	G	A	G	A	G	G	G	A
S1B_36369129	G/T	1B	36369129	+	T	G	T	G	G	G	T	T	G	G	T	G	T	G	T	T	G	G	G	G	G	T	T	T	T	G	T	T	G	T	G	G	T	G	T	T	G	T	G	T	G	T	T	T	G
S1B_40455010	C/G	1B	40455010	+	C	C	C	C	C	C	C	C	C	C	C	C	C	C	C	C	C	C	C	C	C	C	C	S	C	C	C	C	C	C	C	C	C	C	C	C	S	C	C	C	S	C	C	C	C
S1B_41702089	T/C	1B	41702089	+	T	T	T	C	T	T	T	T	Y	T	Y	T	T	T	T	T	T	T	T	T	T	T	T	T	T	T	Y	T	T	Y	T	T	T	T	T	T	T	T	T	T	T	T	T	T	T
S1B_41961699	T/A	1B	41961699	+	T	T	T	T	W	T	T	T	A	T	W	T	T	W	T	T	T	W	W	T	W	T	T	T	T	A	T	T	T	T	W	T	T	A	T	T	T	T	W	T	T	W	W	T	T
S1B_41989732	G/C	1B	41989732	+	G	G	G	G	G	G	G	G	G	C	G	G	G	G	G	G	G	G	G	G	G	G	G	G	G	G	G	G	G	G	G	G	G	G	G	G	G	G	G	G	G	G	G	G	G
S1B_43606025	G/A	1B	43606025	+	G	G	G	G	A	A	G	G	G	A	G	G	G	G	G	G	G	G	A	G	G	G	G	G	G	G	G	G	G	G	G	G	G	G	G	G	G	G	G	G	G	G	G	G	G
S1B_43606027	A/G	1B	43606027	+	A	A	A	A	G	G	A	A	A	G	A	A	A	A	A	A	A	A	G	A	A	A	A	A	A	A	A	A	A	A	A	A	A	A	A	A	A	A	A	A	A	A	A	A	A
S1B_44027307	T/A	1B	44027307	+	T	T	T	T	T	W	T	T	T	T	T	T	T	T	T	T	T	T	T	T	T	T	T	T	T	T	T	T	T	T	T	T	T	T	T	T	T	T	W	T	W	T	T	W	T
S1B_44074226	C/G	1B	44074226	+	C	C	C	S	S	C	S	C	C	S	C	G	S	C	C	C	S	C	C	S	S	C	S	S	C	C	C	C	C	C	C	C	C	S	C	C	S	C	C	C	S	C	C	C	C
S1B_44074267	G/T	1B	44074267	+	G	G	G	G	G	G	K	G	G	G	G	K	G	G	G	G	K	G	G	K	K	G	K	K	G	G	G	G	G	G	G	G	G	K	G	G	K	G	G	G	K	G	G	G	G
S1B_45762514	C/A	1B	45762514	+	A	C	C	A	C	C	C	C	A	A	A	C	C	C	C	A	C	C	A	C	C	A	A	A	A	A	A	M	A	A	C	C	A	C	A	A	C	A	C	A	C	A	A	A	C
S1B_47669564	T/C	1B	47669564	+	T	T	T	Y	T	T	T	T	T	T	T	Y	Y	T	T	T	T	T	T	T	T	T	T	Y	T	T	T	C	T	T	T	Y	T	T	Y	T	T	T	T	T	T	T	C	T	T
S1B_48243101	C/G	1B	48243101	+	C	C	S	C	C	C	C	C	S	C	S	C	C	G	C	S	C	C	S	C	S	C	C	C	C	C	C	C	C	C	C	C	C	C	C	C	C	C	C	C	C	C	S	C	C
S1B_48243111	A/T	1B	48243111	+	W	A	A	A	A	A	A	A	A	W	A	A	A	A	A	A	A	A	A	A	W	A	W	A	A	A	A	A	W	A	W	W	A	A	A	A	A	A	A	A	A	A	A	A	A
S1B_54919175	C/T	1B	54919175	+	Y	C	C	C	Y	Y	C	C	C	Y	C	Y	C	C	C	C	Y	Y	C	C	C	C	Y	Y	Y	Y	C	C	C	C	C	C	Y	C	C	Y	C	C	C	C	C	C	C	C	C
S1B_58752507	G/C	1B	58752507	+	G	G	G	G	G	G	G	G	G	G	G	G	G	G	G	G	G	G	G	S	G	G	G	G	G	S	G	G	G	G	G	S	G	S	G	S	G	G	G	G	G	G	G	G	S
S1B_58833382	C/T	1B	58833382	+	C	C	C	C	C	C	C	C	C	Y	Y	C	C	C	C	C	C	C	C	C	T	C	C	C	C	C	C	C	C	C	C	C	C	C	C	C	C	C	Y	C	C	C	C	C	C
S1B_58833422	C/A	1B	58833422	+	C	C	C	M	C	C	C	C	C	C	C	C	C	C	C	C	C	C	C	C	A	C	C	C	C	C	C	C	M	C	C	C	M	C	C	C	C	C	C	C	C	C	C	C	C
S1B_58833433	T/A	1B	58833433	+	T	T	T	T	T	T	T	T	T	T	T	T	W	W	T	T	T	T	T	T	T	W	T	T	W	W	T	T	W	T	T	T	T	T	T	T	T	T	T	T	T	W	T	T	T
S1B_58833455	T/A	1B	58833455	+	T	T	T	W	T	T	T	T	W	T	T	W	T	W	T	T	T	T	W	T	T	T	T	A	T	W	T	W	T	T	T	T	T	T	T	T	T	T	T	T	T	T	T	T	T
S1B_59482501	G/T	1B	59482501	+	G	G	K	G	K	G	G	G	G	G	T	G	G	G	G	G	G	G	G	G	G	G	G	G	K	G	K	G	G	G	G	G	G	G	G	G	G	K	G	G	G	G	G	G	G
S1B_59589422	C/T	1B	59589422	+	C	C	C	C	C	C	C	C	C	C	C	C	C	C	C	C	C	Y	C	C	C	C	C	C	C	C	C	C	C	C	Y	C	C	C	C	C	C	C	T	C	C	C	C	C	C
S1B_59589431	C/T	1B	59589431	+	C	C	C	C	C	C	C	C	C	C	C	C	C	C	C	C	C	Y	C	C	C	C	C	C	C	C	C	C	C	C	Y	C	C	C	C	C	C	C	T	C	C	C	C	C	C
S1B_60055514	T/C	1B	60055514	+	C	Y	Y	Y	T	T	T	Y	T	T	T	T	T	T	T	T	T	T	T	T	T	Y	T	T	T	T	T	T	T	T	T	T	T	T	T	T	T	Y	T	T	T	T	Y	T	T
S1B_60468088	A/G	1B	60468088	+	A	A	A	A	G	A	A	A	A	A	A	A	A	A	A	A	A	A	G	A	A	A	A	A	A	A	A	A	A	A	A	A	A	A	A	A	A	A	A	A	A	A	A	A	A
S1B_60468121	T/C	1B	60468121	+	T	T	T	T	C	T	T	T	T	T	T	T	T	T	T	T	T	T	C	T	T	T	T	T	T	T	T	T	T	T	T	T	T	T	T	T	T	T	T	T	T	T	T	T	T
S1B_60752800	C/G	1B	60752800	+	C	C	C	C	G	C	C	C	C	C	C	C	C	C	C	C	C	C	S	G	C	C	C	C	C	C	C	C	C	C	C	C	C	C	C	C	C	C	C	C	C	C	C	C	C
S1B_62602862	C/T	1B	62602862	+	C	C	C	Y	C	C	C	C	C	C	C	C	Y	C	Y	Y	C	C	C	C	C	C	C	C	C	C	C	C	C	C	C	C	C	C	C	C	C	C	C	Y	C	C	C	C	C
S1B_66326014	C/A	1B	66326014	+	C	C	C	C	C	A	M	C	C	C	C	C	C	C	C	C	C	C	C	C	C	C	C	A	A	C	C	C	C	C	M	M	C	C	C	C	C	C	C	C	C	C	C	C	M
S1B_66326029	T/C	1B	66326029	+	T	T	T	T	T	C	Y	T	T	T	T	T	T	T	T	T	T	T	T	T	T	T	T	C	C	T	T	T	T	T	Y	Y	T	T	T	T	T	T	T	T	T	T	T	T	Y
S1B_66326062	T/C	1B	66326062	+	T	T	T	T	T	C	Y	T	T	T	T	T	T	T	T	T	T	T	T	T	T	T	T	C	C	T	T	T	T	T	Y	Y	T	T	T	T	T	T	T	T	T	T	T	T	Y
S1B_66326071	C/T	1B	66326071	+	C	C	C	C	C	T	Y	C	C	C	C	C	C	C	C	C	C	C	C	C	C	C	C	T	T	C	C	C	C	C	C	Y	C	C	C	C	C	C	C	C	C	C	C	C	C
S1B_67148254	G/A	1B	67148254	+	A	G	G	G	G	G	G	G	G	G	G	G	G	G	G	G	G	G	G	G	G	G	G	G	G	G	G	G	G	G	G	G	A	G	G	A	G	G	G	A	G	A	A	A	G
S1B_67997193	T/G	1B	67997193	+	T	K	K	G	T	G	T	T	G	G	K	K	T	G	T	T	K	G	T	K	K	G	T	T	T	K	T	K	K	K	T	T	T	T	G	T	T	G	T	T	T	T	T	T	T
S1B_67997236	C/A	1B	67997236	+	C	C	C	C	C	C	C	C	C	C	C	M	M	C	C	C	C	C	A	M	M	C	C	C	C	C	M	C	C	C	C	C	C	C	C	C	C	C	C	C	C	C	C	C	C
S1B_70629831	T/G	1B	70629831	+	T	K	T	T	T	T	K	T	T	K	T	T	T	T	T	T	K	T	T	K	T	T	T	T	K	T	T	T	T	T	T	T	T	K	T	T	T	T	T	T	T	T	K	T	T
S1B_71060612	T/A	1B	71060612	+	T	T	T	T	T	T	T	T	T	W	T	W	W	T	T	T	T	T	T	T	T	T	T	T	T	T	T	T	W	W	W	T	W	T	T	T	W	W	T	T	T	T	T	T	W
S1B_71060615	C/T	1B	71060615	+	C	C	C	C	C	C	C	C	C	Y	C	Y	Y	C	C	C	C	C	C	C	C	C	C	C	C	C	C	C	Y	Y	Y	C	Y	C	C	C	Y	Y	C	C	C	C	C	C	Y
S1B_71534279	G/T	1B	71534279	+	G	G	G	G	G	G	K	G	G	K	G	G	G	G	K	K	G	G	G	G	G	G	K	G	G	G	G	G	K	G	G	G	G	G	G	K	G	G	G	G	G	K	G	G	G
S1B_71534342	G/A	1B	71534342	+	G	G	G	G	G	G	G	G	G	G	G	G	G	G	R	G	G	G	G	G	G	G	R	R	G	G	G	G	R	G	G	G	G	G	G	G	G	G	G	G	G	G	G	G	G
S1B_71534344	C/A	1B	71534344	+	C	C	C	C	C	C	C	C	C	C	C	C	C	C	M	C	C	C	C	C	C	C	M	M	C	C	C	C	M	C	C	C	C	C	C	C	C	C	C	C	C	C	C	C	C
S1B_71534346	G/A	1B	71534346	+	G	G	R	G	R	G	G	G	G	G	G	G	G	G	G	G	G	G	G	G	G	G	G	R	G	G	G	G	G	R	G	G	G	G	G	G	G	R	G	R	G	G	G	R	G
S1B_71534365	C/T	1B	71534365	+	C	C	C	C	C	C	C	C	C	C	C	C	C	C	Y	C	C	C	C	C	C	C	Y	Y	C	C	C	C	Y	C	C	C	C	C	C	C	C	C	C	C	C	C	C	C	C
S1B_74490132	C/T	1B	74490132	+	C	C	C	C	C	C	C	C	C	C	C	C	C	C	C	C	C	C	C	C	C	C	T	T	T	C	C	C	C	C	C	C	C	C	C	C	C	C	C	C	C	C	C	C	C
S1B_75023023	G/T	1B	75023023	+	G	G	G	G	G	G	G	G	G	G	G	G	G	G	G	G	G	G	T	G	G	G	T	T	T	G	G	G	G	G	G	G	G	G	G	G	G	G	G	G	G	G	G	G	G
S1B_75291506	T/C	1B	75291506	+	T	T	C	T	C	T	T	Y	T	T	T	Y	C	T	T	T	T	T	C	T	T	Y	C	C	C	T	Y	Y	T	T	T	T	T	T	T	T	T	T	T	T	T	T	T	T	T
S1B_75291525	C/T	1B	75291525	+	C	C	C	C	T	C	C	C	C	C	C	C	C	C	C	C	C	C	C	C	C	C	Y	T	T	C	Y	C	C	C	C	C	C	C	C	C	C	C	C	C	C	C	C	C	C
S1B_75291531	A/G	1B	75291531	+	A	A	A	A	G	A	A	A	A	A	A	R	A	A	A	A	A	A	G	A	A	A	G	G	G	A	R	A	A	A	A	A	A	A	A	A	A	A	A	A	A	A	A	A	A
S1B_75291550	G/A	1B	75291550	+	G	G	G	G	A	G	G	G	G	G	G	G	G	G	G	G	G	G	A	G	G	G	R	A	A	G	R	G	G	G	G	G	G	G	G	G	G	G	G	G	G	G	G	G	G
S1B_75662913	C/T	1B	75662913	+	C	C	C	C	T	C	C	C	C	C	C	C	C	C	C	C	C	C	T	C	C	C	T	T	T	C	C	C	C	C	C	C	C	C	C	C	C	C	C	C	C	C	C	C	C
S1B_75747762	C/A	1B	75747762	+	C	M	C	C	C	C	C	C	C	C	C	M	C	C	M	C	C	C	C	C	M	M	C	C	C	C	C	C	C	C	C	C	C	C	C	C	C	C	C	C	C	C	C	M	C
S1B_75927471	T/C	1B	75927471	+	T	T	T	T	T	T	T	T	T	T	T	T	T	T	T	T	T	T	C	T	T	T	C	C	C	T	T	T	Y	T	T	T	C	T	T	T	T	T	T	T	T	T	T	T	T
S1B_75927490	T/C	1B	75927490	+	T	T	T	T	T	T	T	T	T	T	T	T	T	T	T	T	T	T	C	T	T	T	C	C	C	T	T	T	Y	T	T	T	C	T	T	T	T	T	T	T	T	T	T	T	T
S1B_75927496	T/C	1B	75927496	+	T	T	T	T	T	T	T	T	T	T	T	T	T	T	T	T	T	T	C	T	T	T	C	C	C	T	T	T	Y	T	T	T	C	T	T	T	T	T	T	T	T	T	T	T	T
S1B_75992250	G/C	1B	75992250	+	G	G	G	G	C	G	G	G	G	G	G	G	G	G	G	G	G	G	C	G	G	G	C	C	C	G	G	G	G	G	G	G	G	G	G	G	G	G	G	G	G	G	G	G	G
S1B_78226866	T/G	1B	78226866	+	T	T	T	T	T	K	T	T	K	T	T	T	T	T	K	K	T	T	T	T	T	T	T	T	T	T	K	T	K	T	T	T	T	T	T	T	T	T	T	T	T	T	T	T	T
S1B_78405051	A/G	1B	78405051	+	A	A	A	A	G	A	A	A	A	A	A	A	A	A	A	A	A	A	G	A	A	A	G	G	G	A	A	A	A	A	A	A	A	A	A	A	A	A	A	A	A	A	A	A	A
S1B_78672307	G/C	1B	78672307	+	G	G	G	G	G	G	G	S	G	G	S	G	G	S	G	G	G	G	G	C	G	G	G	G	G	G	G	G	G	S	G	G	G	G	G	G	G	G	G	G	G	G	G	G	G
S1B_78672310	T/C	1B	78672310	+	T	T	T	T	T	T	T	Y	T	T	Y	T	T	Y	T	T	T	T	T	C	T	T	T	T	T	T	T	T	T	Y	T	T	T	T	T	T	T	T	T	T	T	T	T	T	T
S1B_80683632	G/C	1B	80683632	+	G	G	G	G	C	G	G	G	G	G	G	G	G	G	G	G	G	G	C	G	G	G	C	C	C	G	G	G	G	G	G	G	G	G	G	G	G	G	G	G	G	G	G	G	G
S1B_81978445	T/G	1B	81978445	+	T	T	T	T	G	T	T	T	T	T	T	T	T	T	T	T	T	T	G	T	T	T	G	G	G	T	T	T	T	T	T	T	T	T	T	T	T	T	T	T	T	T	T	T	T
S1B_82711933	G/C	1B	82711933	+	G	G	G	G	C	G	G	G	G	G	G	G	G	G	G	G	G	G	G	G	G	G	C	C	C	G	G	G	G	G	G	G	G	G	G	G	G	G	G	G	G	G	G	G	G
S1B_84786708	C/A	1B	84786708	+	C	C	C	C	A	C	C	C	C	C	C	C	C	C	C	C	C	C	A	C	C	C	A	A	A	C	C	C	C	C	C	C	C	C	C	C	C	C	C	C	C	C	C	C	C
S1B_88995925	T/C	1B	88995925	+	T	T	T	T	C	T	T	T	T	T	T	T	T	T	T	T	T	T	C	T	T	T	C	C	C	T	T	T	T	T	T	T	T	T	T	T	T	T	T	T	T	T	T	T	T
S1B_89313315	T/C	1B	89313315	+	T	T	T	T	T	T	T	T	T	T	T	C	T	T	T	T	T	Y	T	T	T	T	T	T	T	T	T	T	T	T	T	T	T	T	T	T	T	T	T	T	Y	T	T	Y	T
S1B_89313321	A/G	1B	89313321	+	A	R	R	A	A	A	A	A	G	A	G	A	A	A	A	R	A	R	A	R	A	A	R	A	G	A	A	R	A	A	A	A	A	A	A	G	A	A	A	A	A	A	A	A	A
S1B_89313325	A/G	1B	89313325	+	A	A	A	A	A	A	A	A	A	A	A	A	A	A	A	A	A	R	A	A	R	A	A	A	A	A	A	A	A	R	A	G	A	A	R	A	A	R	A	A	A	A	A	R	G
S1B_89313346	T/C	1B	89313346	+	T	T	T	T	Y	T	C	T	T	T	T	T	T	Y	C	T	T	T	T	T	T	T	T	Y	T	Y	T	T	Y	Y	T	T	Y	C	T	T	C	T	T	T	T	T	T	T	T
S1B_89313348	A/G	1B	89313348	+	A	A	A	G	A	A	A	A	A	A	A	A	A	R	A	R	A	A	A	R	A	A	A	A	A	R	A	A	A	A	R	A	A	A	A	A	A	A	A	A	A	A	R	A	A
S1B_89597955	G/A	1B	89597955	+	G	G	G	G	G	R	G	G	G	G	G	G	G	G	G	G	G	G	G	G	R	R	A	R	G	G	G	G	G	G	G	G	G	G	G	G	G	R	G	G	G	G	G	G	G
S1B_89732753	G/A	1B	89732753	+	G	G	G	G	A	G	G	G	G	G	G	G	G	G	G	G	G	G	A	G	G	G	A	R	A	G	G	G	G	G	G	G	G	G	G	G	G	G	G	G	G	G	G	G	G
S1B_90339019	C/G	1B	90339019	+	S	C	C	C	C	C	S	C	C	G	S	C	S	S	C	C	C	C	C	S	C	S	C	S	S	C	C	C	S	C	C	C	C	S	S	C	C	C	C	C	C	C	C	C	G
S1B_90721324	A/T	1B	90721324	+	A	A	A	A	A	A	A	W	A	A	A	A	A	A	W	A	A	A	W	W	A	A	A	A	A	A	W	A	A	A	W	A	A	A	A	A	W	A	W	A	A	A	A	A	A
S1B_90912460	C/T	1B	90912460	+	C	C	C	C	C	C	C	Y	C	T	C	Y	C	C	C	C	Y	C	C	C	C	C	C	C	C	T	C	C	C	C	C	C	C	T	C	C	C	C	C	C	C	C	C	Y	C
S1B_92540619	T/C	1B	92540619	+	T	T	T	T	T	T	T	T	T	T	T	T	Y	T	T	T	T	Y	T	T	T	T	T	T	T	T	T	T	T	T	Y	Y	Y	T	T	T	T	T	Y	T	T	T	T	C	T
S1B_94690609	G/T	1B	94690609	+	G	G	G	G	G	G	G	G	G	G	G	G	G	G	G	G	G	G	G	G	G	G	K	G	K	G	G	G	G	G	G	G	G	G	K	K	G	K	G	G	G	G	G	K	G
S1B_98490329	T/A	1B	98490329	+	T	T	T	T	W	T	T	T	T	T	T	W	T	T	T	T	T	T	T	T	A	T	T	W	T	W	T	T	T	T	T	T	T	T	T	T	T	T	T	T	T	T	T	T	T
S1B_98490354	C/T	1B	98490354	+	C	C	C	C	Y	C	C	C	C	C	C	Y	C	C	C	C	C	C	C	C	T	C	C	Y	C	Y	C	C	C	C	C	C	C	C	C	C	C	C	C	C	C	C	C	C	C
S1B_98490356	G/A	1B	98490356	+	G	G	G	G	G	G	G	R	G	G	G	G	G	G	G	G	G	G	G	G	G	A	G	R	G	G	G	G	G	G	G	G	G	G	G	G	G	G	G	G	R	G	G	G	G
S1B_100044625	A/G	1B	100044625	+	G	A	A	A	A	A	A	A	A	G	A	A	A	A	A	A	A	A	A	A	A	A	A	A	A	A	A	A	A	A	A	A	G	A	A	G	A	A	A	G	A	G	G	G	A
S1B_100202172	T/C	1B	100202172	+	C	T	T	T	T	T	T	T	T	C	T	T	C	T	T	T	T	T	T	T	T	T	T	T	T	T	T	T	T	T	T	T	C	T	T	C	T	T	T	C	T	C	C	C	T
S1B_100260000	A/G	1B	100260000	+	A	A	A	A	A	A	A	A	A	A	A	A	A	A	A	A	A	A	A	A	A	G	A	A	A	A	A	G	A	A	A	A	A	A	A	A	A	A	A	A	A	A	A	A	A
S1B_101178028	A/G	1B	101178028	+	A	A	A	A	A	A	A	A	A	A	A	A	A	A	A	A	A	G	A	A	A	A	A	A	A	A	R	A	A	A	R	R	A	A	A	R	A	A	R	A	A	A	A	A	A
S1B_101178041	G/C	1B	101178041	+	G	G	G	G	G	G	G	G	G	G	G	G	G	G	G	G	G	C	G	G	G	G	G	G	G	G	S	G	G	G	S	S	G	G	G	S	G	G	G	G	G	G	G	G	G
S1B_105024094	T/A	1B	105024094	+	T	T	T	W	T	W	T	T	T	T	T	T	T	T	T	T	T	T	T	T	T	T	T	T	T	T	T	T	T	T	T	T	T	T	T	T	T	W	T	T	T	T	T	T	T
S1B_116873854	G/T	1B	116873854	+	G	T	G	G	G	K	G	G	K	G	G	K	K	K	G	G	G	G	K	K	K	G	G	G	G	G	G	G	G	G	G	G	G	G	G	G	K	G	K	G	G	G	G	G	G
S1B_116873879	C/T	1B	116873879	+	C	T	C	T	C	Y	C	C	Y	C	C	Y	Y	Y	C	C	C	C	Y	Y	Y	C	C	C	C	C	C	C	C	C	C	C	C	C	C	C	Y	C	Y	C	C	C	C	C	C
S1B_116873889	G/A	1B	116873889	+	G	A	G	G	R	R	G	G	R	G	G	R	R	R	G	G	G	G	R	R	R	G	G	G	G	G	G	G	G	G	G	G	G	G	G	G	R	G	R	G	G	G	G	G	G
S1B_117904131	G/A	1B	117904131	+	A	G	A	G	A	G	A	A	G	A	G	G	G	G	G	G	G	G	G	G	G	A	G	G	G	G	G	G	G	G	G	G	A	G	G	A	G	G	G	A	G	A	A	A	G
S1B_126697347	G/A	1B	126697347	+	G	G	G	G	R	G	G	G	G	G	G	G	G	G	G	G	G	G	A	G	G	G	R	R	R	G	G	G	G	G	G	G	G	G	G	G	G	G	G	G	G	G	G	G	G
S1B_127923411	C/T	1B	127923411	+	C	C	C	C	C	C	C	C	C	Y	Y	C	C	C	C	C	C	C	C	C	C	C	C	C	C	C	C	C	C	Y	C	C	Y	C	T	C	C	T	C	C	C	Y	Y	Y	C
S1B_139636612	T/C	1B	139636612	+	T	T	T	T	C	T	T	T	T	T	T	T	T	T	T	T	T	T	C	T	T	T	C	C	C	T	T	T	T	T	T	T	T	T	T	T	T	T	T	T	T	T	T	T	T
S1B_139883367	C/T	1B	139883367	+	C	C	C	C	C	C	C	C	C	C	C	C	C	C	C	C	C	T	C	C	C	C	C	C	C	C	Y	C	C	C	C	T	C	C	C	C	C	C	Y	C	C	C	C	C	C
S1B_140064415	A/G	1B	140064415	+	A	A	A	A	G	A	A	A	A	A	A	A	A	A	A	A	A	A	G	A	A	A	G	G	G	A	A	A	A	A	A	A	A	A	A	A	A	A	A	A	A	A	A	A	A
S1B_141404392	G/A	1B	141404392	+	G	G	G	G	G	G	R	G	G	G	G	G	G	R	G	G	G	R	G	G	G	G	G	G	G	G	G	G	G	G	R	G	G	G	G	G	R	G	G	R	G	G	G	G	G
S1B_141404405	G/A	1B	141404405	+	G	G	G	G	G	G	G	G	G	G	R	G	G	G	G	G	G	G	G	G	R	G	R	G	R	G	G	G	G	G	G	R	G	G	G	G	R	G	G	G	G	G	G	R	G
S1B_141404416	G/A	1B	141404416	+	G	G	G	G	G	G	G	G	G	G	G	G	G	G	G	R	G	G	G	G	G	G	G	G	G	G	G	G	G	G	G	G	G	G	G	R	G	G	G	R	G	G	G	G	G
S1B_141608864	T/A	1B	141608864	+	T	T	T	T	A	T	T	T	T	T	T	T	T	T	T	T	T	T	A	T	T	T	A	A	A	T	T	T	T	T	T	T	T	T	T	T	T	T	T	T	T	T	T	T	T
S1B_142998997	C/T	1B	142998997	+	C	C	C	C	T	C	C	C	C	C	C	C	C	C	C	C	C	C	T	C	C	C	T	T	T	C	C	C	C	C	C	C	C	C	C	C	C	C	C	C	C	C	C	C	C
S1B_142999000	T/C	1B	142999000	+	T	T	T	T	C	T	T	T	T	T	T	T	T	T	T	T	T	T	C	T	T	T	C	C	C	T	T	T	T	T	T	T	T	T	T	T	T	T	T	T	T	T	T	T	T
S1B_145778719	T/G	1B	145778719	+	T	T	T	T	T	T	T	T	G	T	K	T	T	T	T	T	T	T	T	K	K	T	K	K	T	T	T	T	T	T	T	T	K	T	K	T	K	K	T	T	K	T	T	K	T
S1B_145778728	C/T	1B	145778728	+	C	Y	C	C	C	Y	C	C	C	C	C	Y	C	C	C	C	C	Y	C	C	C	C	C	C	Y	C	C	C	C	C	C	Y	C	C	C	Y	C	C	C	C	C	C	C	C	T
S1B_146639767	C/T	1B	146639767	+	C	C	C	C	C	C	C	C	C	C	C	C	C	C	C	C	C	Y	C	C	C	C	C	C	C	C	Y	C	C	C	Y	Y	C	C	C	Y	C	C	Y	C	C	C	C	C	C
S1B_148836024	C/G	1B	148836024	+	C	C	C	C	G	C	C	C	C	C	C	C	C	C	C	C	C	C	G	C	C	C	G	G	G	C	C	C	C	C	C	C	C	C	C	C	C	C	C	C	C	C	C	C	C
S1B_148836059	T/C	1B	148836059	+	T	T	T	T	C	T	T	T	T	T	T	T	T	T	T	T	T	T	C	T	T	T	C	C	C	T	T	T	T	T	T	T	T	T	T	T	T	T	T	T	T	T	T	T	T
S1B_151047380	A/G	1B	151047380	+	A	R	A	R	A	A	A	A	A	A	A	A	A	A	A	A	A	R	A	A	A	A	A	A	A	A	R	A	A	A	R	R	A	R	A	R	A	A	R	A	R	A	R	A	A
S1B_151200084	A/G	1B	151200084	+	A	A	A	A	G	A	A	A	A	A	A	A	A	A	A	A	A	A	G	A	A	A	G	G	G	A	A	A	A	A	A	A	A	A	A	A	A	A	A	A	A	A	A	A	A
S1B_151200148	G/T	1B	151200148	+	G	G	G	G	T	G	G	G	G	G	G	G	G	G	G	G	G	T	T	G	G	G	T	T	T	G	G	G	G	G	K	G	G	G	G	G	G	G	T	G	G	G	G	G	G
S1B_151200193	A/G	1B	151200193	+	A	A	A	A	A	A	A	A	A	A	A	A	A	A	A	A	A	G	A	A	A	A	A	A	A	A	A	A	A	A	R	A	A	A	A	A	A	A	G	A	A	A	A	A	A
S1B_152041366	C/T	1B	152041366	+	C	C	C	C	C	C	C	C	C	C	C	C	C	C	C	C	C	Y	C	C	C	C	C	C	C	C	Y	C	C	C	Y	Y	C	C	C	Y	C	C	Y	C	C	C	C	C	C
S1B_155923062	T/C	1B	155923062	+	T	T	T	T	C	T	T	T	T	T	T	T	T	T	T	T	T	T	C	T	T	T	C	C	C	T	T	T	T	T	T	T	T	T	T	T	T	T	T	T	T	T	T	T	T
S1B_156676355	G/C	1B	156676355	+	G	G	G	G	G	G	G	G	G	G	G	G	G	G	G	G	G	C	G	G	G	G	G	G	G	G	S	G	G	G	S	S	G	G	G	S	G	G	S	G	G	G	G	G	G
S1B_156676361	C/T	1B	156676361	+	C	C	C	C	C	C	C	C	C	C	C	C	C	C	C	C	C	T	C	C	C	C	C	C	C	C	Y	C	C	C	Y	Y	C	C	C	Y	C	C	Y	C	C	C	C	C	C
S1B_156676405	G/A	1B	156676405	+	G	G	G	G	G	G	G	G	G	G	G	G	G	G	G	G	G	A	G	G	G	G	G	G	G	G	R	G	G	G	R	R	G	G	G	R	G	G	R	G	G	G	G	G	G
S1B_156840247	G/A	1B	156840247	+	G	G	G	G	A	G	G	G	G	G	G	G	G	G	G	G	G	G	A	G	G	G	A	A	A	G	G	G	G	G	G	G	G	G	G	G	G	G	G	G	G	G	G	G	G
S1B_157399343	T/C	1B	157399343	+	T	T	T	T	T	T	T	T	T	Y	T	T	T	T	T	T	T	T	T	T	T	T	Y	Y	Y	T	T	T	T	T	T	T	T	T	T	T	T	T	T	T	T	T	T	T	T
S1B_158148388	T/C	1B	158148388	+	T	T	T	T	T	T	T	T	T	T	T	T	T	T	T	T	T	C	T	T	T	T	T	T	T	T	Y	T	T	T	Y	C	T	T	T	Y	T	T	Y	T	T	T	T	T	T
S1B_164499555	G/A	1B	164499555	+	G	G	G	R	G	A	G	G	G	G	G	R	G	G	G	G	G	G	G	G	R	G	G	R	G	R	G	G	R	A	G	G	G	G	G	G	G	G	G	R	G	G	R	G	G
S1B_164499579	C/T	1B	164499579	+	C	C	C	Y	C	T	C	C	C	C	C	C	C	C	C	C	C	C	C	C	C	C	C	Y	C	Y	C	C	Y	T	C	C	C	C	C	C	C	C	C	Y	C	C	Y	C	C
S1B_164499588	G/T	1B	164499588	+	G	G	G	K	G	T	G	G	G	G	G	G	G	G	G	G	G	G	G	G	G	G	G	K	G	K	G	G	K	T	G	G	G	G	G	G	G	G	G	K	G	G	K	G	G
S1B_164499589	T/G	1B	164499589	+	T	T	T	K	T	G	T	T	T	T	T	K	T	T	T	T	T	T	T	T	K	T	T	K	T	K	T	T	K	G	T	T	T	T	T	T	T	T	T	K	T	T	K	T	T
S1B_165395509	G/C	1B	165395509	+	G	G	S	G	G	G	G	G	G	G	G	G	G	G	S	G	G	G	G	G	G	G	S	G	S	G	G	S	G	G	S	G	G	G	G	G	G	G	G	G	S	G	G	G	G
S1B_165395512	T/C	1B	165395512	+	T	T	Y	T	T	T	T	T	T	T	T	T	T	T	Y	T	T	T	T	T	T	T	Y	T	Y	T	T	Y	T	T	Y	T	T	T	T	T	T	T	T	T	Y	T	T	T	T
S1B_166839227	C/G	1B	166839227	+	C	S	C	C	S	C	C	C	C	C	S	C	C	C	C	C	C	C	S	C	C	C	C	C	C	C	C	C	C	C	C	C	C	C	C	C	C	C	C	C	C	C	C	C	C
S1B_169303698	C/G	1B	169303698	+	S	C	C	S	C	C	S	C	C	S	C	C	C	C	C	C	C	C	C	G	C	S	C	C	C	C	C	C	C	C	C	S	C	C	C	C	C	S	C	C	S	C	C	C	C
S1B_169303701	C/G	1B	169303701	+	C	C	C	C	C	C	S	C	C	C	C	C	C	S	C	C	C	C	C	C	C	C	C	C	C	C	C	C	S	C	C	S	C	C	S	C	C	C	S	C	C	C	C	C	C
S1B_171387891	T/A	1B	171387891	+	T	T	A	T	T	T	T	T	T	T	W	T	T	T	T	T	T	T	T	T	T	T	T	T	T	T	T	T	T	A	T	T	T	T	W	T	T	W	T	T	T	T	T	T	T
S1B_171387896	C/G	1B	171387896	+	C	C	G	C	C	C	C	C	C	C	S	C	C	C	C	C	C	C	C	C	C	C	C	C	C	C	C	C	C	G	C	C	C	C	S	C	C	S	C	C	C	C	C	C	C
S1B_172846375	A/T	1B	172846375	+	W	A	A	A	W	W	A	A	A	T	A	A	A	A	A	A	A	A	A	A	A	A	W	A	A	A	A	A	T	A	A	A	A	A	A	T	A	A	A	A	A	A	A	A	A
S1B_177367078	G/A	1B	177367078	+	G	G	G	G	A	G	G	G	G	G	G	G	G	G	G	G	G	G	A	G	G	G	A	A	A	G	G	G	G	G	G	G	G	G	G	G	G	G	G	G	G	G	G	G	G
S1B_177669057	G/C	1B	177669057	+	G	G	G	G	S	G	S	G	G	G	G	G	G	G	G	G	G	G	G	G	G	G	G	G	S	G	G	G	S	G	G	G	G	G	C	G	G	G	S	G	G	G	G	G	G
S1B_179819040	C/G	1B	179819040	+	C	C	C	C	C	C	C	C	S	C	S	C	C	C	C	C	C	S	C	C	C	C	C	C	C	C	C	C	C	C	C	C	C	C	S	C	S	C	C	C	C	C	C	C	C
S1B_185122795	C/T	1B	185122795	+	C	C	C	C	T	C	C	C	C	C	C	C	C	C	C	C	C	C	T	C	C	C	T	T	T	C	C	C	C	C	C	C	C	C	C	C	C	C	C	C	C	C	C	C	C
S1B_186612261	G/A	1B	186612261	+	G	G	G	G	A	G	G	G	G	G	G	G	G	G	G	G	G	G	A	G	G	G	A	A	A	G	G	G	G	G	G	G	G	G	G	G	G	G	G	G	G	G	G	G	G
S1B_186612294	G/C	1B	186612294	+	G	G	S	G	G	G	S	G	G	G	G	G	G	G	S	G	G	G	G	G	G	G	G	G	G	G	S	G	G	G	G	G	G	G	G	G	G	G	S	G	G	G	G	S	G
S1B_186682556	G/T	1B	186682556	+	G	G	G	G	K	G	G	G	G	G	G	G	G	G	G	G	G	G	G	G	K	G	G	G	G	G	G	G	G	G	G	G	G	G	G	K	G	K	G	K	G	G	G	G	G
S1B_186682580	A/C	1B	186682580	+	A	A	A	A	M	A	A	A	A	A	A	A	A	A	A	A	A	A	A	A	M	A	A	A	A	A	A	A	A	A	A	A	A	A	A	M	A	M	A	M	A	A	A	A	A
S1B_187676282	A/G	1B	187676282	+	A	A	A	A	G	A	A	A	A	A	A	A	A	A	A	A	A	A	G	A	A	A	G	G	G	A	A	A	A	A	A	A	A	A	R	A	A	A	A	A	A	A	A	A	A
S1B_190326078	C/T	1B	190326078	+	C	C	C	C	T	C	C	C	C	C	C	C	C	C	C	C	C	C	T	C	C	C	T	T	T	C	C	C	C	C	C	C	C	C	C	C	C	C	C	C	C	C	C	C	C
S1B_192845582	C/T	1B	192845582	+	C	C	C	Y	Y	T	C	C	Y	C	C	C	C	C	C	C	C	C	T	C	C	C	C	C	C	C	C	T	C	C	C	C	C	C	C	C	C	C	C	C	C	C	C	C	C
S1B_192845596	T/A	1B	192845596	+	T	W	T	T	T	T	T	T	W	T	W	T	T	T	W	T	T	T	T	T	T	T	T	T	T	W	T	T	W	T	T	T	T	W	W	T	T	W	T	A	A	W	T	T	T
S1B_192968341	A/C	1B	192968341	+	A	A	A	A	C	A	A	A	A	A	A	A	A	A	A	A	A	A	C	A	A	A	C	C	C	A	A	A	A	A	A	A	A	A	A	A	A	A	A	A	A	A	A	A	A
S1B_192968343	G/T	1B	192968343	+	G	G	G	G	T	G	G	G	G	G	G	G	G	G	G	G	G	G	T	G	G	G	T	T	T	G	G	G	G	G	G	G	G	G	G	G	G	G	G	G	G	G	G	G	G
S1B_192968374	T/C	1B	192968374	+	T	T	T	T	C	T	T	T	T	T	T	T	T	T	T	T	T	T	C	T	T	T	C	C	C	T	T	T	T	T	T	T	T	T	T	T	T	T	T	T	T	T	T	T	T
S1B_192984113	G/A	1B	192984113	+	G	G	G	G	G	G	G	G	G	G	G	G	G	G	G	G	G	G	G	G	G	G	G	G	G	G	R	G	G	G	G	G	G	G	G	G	R	R	G	G	G	G	G	G	G
S1B_194699500	C/T	1B	194699500	+	C	C	C	C	T	C	C	C	C	C	C	C	C	C	C	C	C	C	T	C	C	C	T	T	T	C	C	C	C	C	C	C	C	C	C	C	C	C	C	C	C	C	C	C	C
S1B_194897350	C/T	1B	194897350	+	C	C	C	C	T	C	C	C	C	C	C	C	C	C	C	C	C	C	T	C	C	C	T	T	T	C	C	C	C	C	C	C	C	C	C	C	C	C	C	C	C	C	C	C	C
S1B_197190188	C/T	1B	197190188	+	C	C	C	C	C	T	C	C	C	C	C	T	C	C	C	C	Y	C	C	C	C	C	Y	Y	T	C	T	C	C	C	C	C	C	C	C	C	T	C	C	C	C	C	C	C	T
S1B_197190199	G/A	1B	197190199	+	G	A	A	G	G	G	G	A	G	G	G	G	G	G	G	G	R	R	R	G	G	G	G	R	G	G	G	G	G	G	G	G	G	G	G	G	G	G	G	G	G	R	G	G	G
S1B_197190242	C/G	1B	197190242	+	C	G	G	C	C	C	C	G	C	C	C	C	C	C	C	C	S	S	S	C	C	C	C	S	C	C	C	C	C	C	C	C	C	C	C	C	C	C	C	C	C	S	C	C	C
S1B_202187431	G/A	1B	202187431	+	R	G	G	A	G	G	G	G	G	G	G	A	G	G	G	G	G	G	G	G	G	G	G	G	G	G	G	G	R	R	G	G	G	A	R	R	R	G	G	R	G	A	G	G	G
S1B_202187441	C/T	1B	202187441	+	C	C	Y	C	C	C	C	C	C	T	T	C	C	C	C	C	C	C	C	C	C	C	C	C	C	C	C	C	C	Y	Y	Y	C	C	Y	C	C	Y	Y	C	Y	C	C	C	C
S1B_205006834	C/G	1B	205006834	+	C	C	C	C	G	C	C	C	C	C	C	C	C	C	C	C	C	C	G	C	C	C	G	G	G	C	C	C	C	C	C	C	C	C	C	C	C	C	C	C	C	C	C	C	C
S1B_205062127	A/G	1B	205062127	+	A	A	A	A	G	A	A	A	A	A	A	A	A	A	A	A	A	A	G	A	A	A	G	G	G	A	A	A	A	A	A	A	A	A	A	A	A	A	A	A	A	A	A	A	A
S1B_205063897	C/T	1B	205063897	+	C	C	C	C	T	C	C	C	C	C	C	C	C	C	C	C	C	C	T	C	C	C	T	T	T	C	C	C	C	C	C	C	C	C	C	C	C	C	C	C	C	C	C	C	C
S1B_205084002	G/A	1B	205084002	+	G	G	G	G	A	G	G	G	G	G	G	G	G	G	G	G	G	G	A	G	G	G	A	A	A	G	G	G	G	G	G	G	G	G	G	G	G	G	G	G	G	G	G	G	G
S1B_206544989	C/G	1B	206544989	+	C	C	C	C	C	C	C	C	C	S	C	C	C	C	C	C	C	C	S	C	C	C	S	C	C	C	C	C	C	S	C	C	C	C	S	C	C	S	C	C	C	C	C	C	S
S1B_206545017	C/T	1B	206545017	+	C	C	C	C	C	T	C	C	C	C	C	C	C	C	C	C	C	C	C	T	C	C	C	C	C	C	C	C	C	C	C	C	C	C	C	C	T	C	C	C	C	C	C	C	C
S1B_206545036	A/T	1B	206545036	+	A	A	A	A	A	A	A	A	A	A	A	A	A	A	A	A	A	T	A	A	A	A	A	A	A	A	T	A	A	A	T	T	A	A	A	T	A	A	T	A	A	A	A	A	A
S1B_206545040	C/G	1B	206545040	+	G	C	C	C	C	C	C	C	G	G	C	G	G	C	G	G	C	C	G	C	C	G	G	C	C	G	C	C	C	G	C	C	G	C	G	C	C	G	C	G	C	G	C	G	C
S1B_206976425	G/T	1B	206976425	+	G	G	K	G	G	G	G	G	G	K	G	G	G	G	G	K	G	G	G	G	G	G	G	G	G	T	G	G	G	G	G	G	G	G	K	G	G	G	G	K	G	G	K	G	G
S1B_206976454	C/A	1B	206976454	+	C	C	M	C	C	C	C	C	C	M	C	C	C	C	C	M	C	C	C	C	C	C	C	C	C	A	C	C	C	C	C	C	C	C	M	C	C	C	C	M	C	C	M	C	C
S1B_208451511	A/G	1B	208451511	+	A	A	A	A	G	A	A	A	A	A	A	A	A	A	A	A	A	A	G	A	A	A	G	G	G	A	A	A	A	A	A	A	A	A	A	A	A	A	A	A	A	A	A	A	A
S1B_217699979	A/G	1B	217699979	+	G	A	A	A	A	A	A	A	A	A	A	A	A	A	A	A	A	A	A	A	A	A	A	A	A	A	A	A	A	A	A	A	R	A	G	R	A	A	A	R	A	R	R	R	A
S1B_218957156	G/T	1B	218957156	+	G	K	G	G	G	G	G	G	G	G	G	T	G	K	G	G	G	G	G	G	G	G	T	G	G	T	G	G	G	G	G	G	G	K	G	G	G	G	G	G	K	G	G	G	K
S1B_218957174	G/A	1B	218957174	+	G	R	G	R	G	A	G	G	G	G	G	G	G	G	R	R	G	G	G	G	G	G	G	G	G	G	R	G	G	G	G	G	G	G	G	R	G	G	G	G	G	R	G	R	G
S1B_220048893	T/G	1B	220048893	+	T	T	T	T	T	T	T	T	T	T	T	T	T	T	T	T	T	T	G	T	T	T	G	G	G	T	T	T	T	T	T	T	T	T	T	T	T	T	T	T	T	T	T	T	T
S1B_220930608	G/A	1B	220930608	+	G	G	G	G	G	G	G	G	G	G	R	G	G	G	G	R	G	G	G	G	G	R	A	R	R	G	G	G	G	R	G	G	G	G	R	G	G	R	G	G	G	G	G	G	G
S1B_220931000	G/A	1B	220931000	+	G	G	G	G	A	G	G	G	G	G	G	G	G	G	G	G	G	G	A	G	G	G	A	A	A	G	G	G	G	G	G	G	G	G	G	G	G	G	G	G	G	G	G	G	G
S1B_224279497	C/T	1B	224279497	+	T	C	T	C	T	C	T	T	C	C	T	C	C	C	C	C	C	C	T	C	C	C	T	T	C	C	C	C	C	T	C	C	T	C	T	T	C	T	C	T	C	T	T	T	C
S1B_230171002	G/A	1B	230171002	+	G	G	G	G	G	G	G	G	G	A	G	G	G	G	G	G	G	A	G	G	G	R	R	G	G	G	R	G	G	G	G	G	G	R	G	R	R	G	G	G	G	A	A	R	G
S1B_230171005	G/A	1B	230171005	+	G	G	G	G	G	G	G	G	G	A	G	G	G	G	G	G	G	A	G	G	G	R	R	G	G	G	R	G	G	G	G	G	G	R	G	R	R	G	G	G	G	A	A	R	G
S1B_231826491	T/A	1B	231826491	+	W	T	T	T	T	T	T	T	W	W	T	T	T	T	T	T	T	T	T	T	T	T	T	T	T	T	W	T	W	T	W	T	T	T	T	W	T	W	T	T	T	T	T	T	T
S1B_232335160	C/T	1B	232335160	+	C	C	T	C	C	C	Y	C	C	C	Y	C	C	C	C	Y	C	C	C	C	C	C	C	C	C	C	Y	C	C	C	C	C	C	C	C	C	C	Y	C	C	C	C	C	C	C
S1B_232520842	T/C	1B	232520842	+	T	T	T	T	T	Y	T	T	T	T	T	T	T	T	T	T	T	T	T	T	T	T	T	T	T	T	T	T	T	T	Y	Y	T	T	Y	T	T	T	T	T	T	Y	T	T	T
S1B_234819200	T/C	1B	234819200	+	T	T	T	T	C	T	T	T	T	T	T	T	T	T	T	T	T	T	T	T	T	T	C	C	T	T	T	T	T	T	T	T	T	T	T	T	T	T	T	T	T	T	T	T	T
S1B_239060202	T/A	1B	239060202	+	T	T	T	T	W	T	T	T	T	T	T	T	T	T	T	T	T	T	T	T	T	T	T	T	T	W	T	T	T	A	T	T	W	T	T	T	T	T	T	T	T	T	T	T	T
S1B_239060222	G/T	1B	239060222	+	G	K	G	G	G	G	G	G	G	G	G	G	G	G	G	G	G	G	K	G	K	G	K	G	G	G	K	G	K	G	K	K	G	G	G	G	G	G	G	G	G	G	G	G	G
S1B_239060223	G/T	1B	239060223	+	G	G	G	G	K	G	G	G	G	G	G	G	G	G	G	G	G	G	G	G	G	G	G	G	G	K	G	G	G	G	G	G	K	G	G	G	G	G	G	G	G	G	G	G	G
S1B_239060226	T/C	1B	239060226	+	T	T	T	T	T	T	T	Y	T	T	T	T	T	T	T	T	T	T	T	C	T	T	T	Y	T	T	T	T	T	T	T	T	T	T	T	T	T	T	T	T	T	T	T	T	T
S1B_239060242	C/T	1B	239060242	+	C	Y	C	C	C	C	C	C	C	C	C	C	C	C	C	C	C	C	Y	C	Y	C	Y	C	C	C	Y	C	Y	C	Y	Y	C	C	C	C	C	C	C	C	C	C	C	C	C
S1B_239060243	G/A	1B	239060243	+	G	G	G	G	G	G	G	R	G	G	R	G	G	G	G	G	G	G	G	A	G	G	G	R	G	G	G	G	G	G	G	G	G	G	G	G	G	G	G	G	G	G	G	G	G
S1B_241159641	G/A	1B	241159641	+	G	R	G	G	G	G	G	G	G	G	G	A	G	A	A	G	A	A	G	A	A	G	G	G	G	G	G	G	G	G	G	G	G	G	G	G	G	G	G	G	G	G	G	G	G
S1B_241298635	C/A	1B	241298635	+	C	M	M	C	C	C	C	M	C	C	C	C	C	C	M	C	C	C	C	C	C	C	C	C	C	C	M	C	C	C	C	C	C	C	C	C	C	C	C	C	C	C	A	M	C
S1B_241298642	G/A	1B	241298642	+	A	G	G	R	G	G	G	G	G	G	G	G	G	G	G	G	G	G	G	G	G	G	G	G	G	G	G	G	G	G	G	G	G	G	G	R	G	G	G	G	R	R	G	G	G
S1B_241590661	G/C	1B	241590661	+	G	G	G	G	G	G	G	G	G	G	G	S	G	C	G	G	G	G	G	G	G	G	G	G	G	G	G	G	S	G	G	G	G	G	G	S	G	G	S	S	G	G	G	G	G
S1B_251971174	T/A	1B	251971174	+	T	W	T	T	T	T	T	T	W	T	T	T	T	T	W	T	T	T	T	T	T	T	T	T	T	T	T	T	T	T	T	T	W	T	T	W	T	T	T	W	T	W	T	T	T
S1B_251971182	G/T	1B	251971182	+	G	K	G	G	G	G	G	G	K	G	G	G	G	G	K	G	G	G	G	G	G	G	G	G	G	G	G	G	G	G	G	G	K	G	G	K	G	G	G	K	G	K	G	G	G
S1B_255625996	C/T	1B	255625996	+	C	C	C	C	C	C	C	C	C	C	C	C	C	C	C	C	C	Y	C	C	C	C	C	C	C	C	Y	C	C	C	Y	Y	C	C	C	Y	C	C	Y	C	C	C	C	C	C
S1B_257021490	G/C	1B	257021490	+	G	G	G	G	G	G	G	G	G	G	G	G	G	G	G	G	G	G	C	G	G	G	C	C	C	G	G	S	G	G	G	G	G	G	G	G	G	G	G	G	G	G	G	G	G
S1B_259214830	T/C	1B	259214830	+	Y	T	T	C	T	T	T	C	T	T	C	T	T	T	T	C	T	Y	T	T	T	Y	T	Y	T	Y	T	T	T	Y	Y	T	T	T	T	T	T	T	T	Y	T	T	T	T	T
S1B_259214859	T/C	1B	259214859	+	Y	T	T	T	T	T	T	T	Y	T	T	T	T	T	T	T	T	T	T	T	T	T	Y	Y	Y	Y	T	T	T	T	T	T	T	T	T	T	T	Y	T	T	T	T	Y	T	T
S1B_259575410	C/A	1B	259575410	+	C	C	C	M	C	C	C	C	M	C	C	C	C	C	C	C	C	C	C	A	C	C	C	C	C	M	C	C	C	C	C	C	C	A	C	C	C	C	C	C	A	C	C	C	C
S1B_261518884	C/A	1B	261518884	+	M	C	C	M	C	A	C	C	C	C	C	C	C	C	C	C	C	C	C	C	C	C	C	C	A	C	C	C	C	C	C	C	C	C	C	C	C	C	C	C	C	C	C	C	C
S1B_261518889	T/C	1B	261518889	+	T	T	T	T	T	T	Y	Y	T	T	T	T	T	T	T	T	T	T	T	T	T	T	C	T	T	T	Y	T	T	T	T	T	T	T	T	Y	T	Y	Y	T	T	C	T	T	T
S1B_264711445	C/G	1B	264711445	+	C	C	G	C	C	C	C	C	C	C	C	C	C	C	C	C	C	C	C	C	C	C	C	C	S	C	C	C	C	C	C	S	C	C	C	C	C	C	C	C	C	C	C	C	C
S1B_264711463	C/A	1B	264711463	+	C	M	C	M	C	M	C	A	C	C	M	C	C	A	C	C	M	A	C	C	C	C	C	C	C	A	M	C	C	C	C	C	C	C	C	C	C	C	A	C	C	A	C	C	M
S1B_267634264	C/T	1B	267634264	+	C	C	C	C	Y	T	C	C	C	T	Y	C	C	C	C	C	C	Y	C	C	C	C	C	C	C	C	C	C	C	C	Y	Y	C	C	C	C	C	C	C	C	C	C	C	C	C
S1B_268327981	C/T	1B	268327981	+	C	C	Y	C	C	C	C	Y	C	C	Y	C	T	C	C	C	C	T	C	C	C	C	C	C	Y	C	C	T	C	C	C	C	C	C	C	C	C	C	C	C	C	C	C	C	C
S1B_268327994	C/T	1B	268327994	+	C	C	Y	C	C	C	C	Y	C	C	Y	C	T	C	C	C	C	T	C	C	C	C	C	C	Y	C	C	T	C	C	C	C	C	C	C	C	C	C	C	C	C	C	C	C	C
S1B_276898540	G/A	1B	276898540	+	A	G	A	G	A	G	A	A	G	A	A	G	G	G	G	G	G	G	A	G	G	A	A	A	A	G	G	R	G	A	G	G	A	G	A	A	G	A	G	A	G	A	A	A	G
S1B_279387556	T/C	1B	279387556	+	C	T	C	T	C	T	C	C	T	C	C	T	T	T	T	T	T	T	C	T	T	C	C	C	C	T	T	C	T	C	T	T	C	T	C	C	T	C	T	C	T	C	C	C	T
S1B_283687901	C/T	1B	283687901	+	C	T	T	Y	C	Y	C	C	C	C	Y	T	C	C	Y	C	C	C	C	C	C	C	Y	Y	Y	C	Y	C	Y	C	C	C	Y	C	C	C	T	Y	C	C	C	C	C	C	C
S1B_284430272	G/C	1B	284430272	+	S	G	C	G	G	G	C	C	G	C	C	G	G	G	G	G	G	G	G	G	G	C	G	G	G	G	G	C	G	C	G	G	C	G	C	C	G	C	G	C	G	C	C	C	G
S1B_284430918	C/T	1B	284430918	+	Y	C	T	C	T	C	T	T	C	T	T	C	C	C	C	C	C	C	T	C	C	T	T	T	T	C	C	T	C	T	C	C	T	C	T	T	C	T	C	T	C	T	T	T	C
S1B_286662973	G/C	1B	286662973	+	C	G	C	G	G	G	C	C	G	C	C	G	G	G	G	G	G	G	G	G	G	C	G	G	G	G	G	C	G	C	G	G	C	G	C	C	G	C	G	C	G	C	C	C	G
S1B_286662974	T/G	1B	286662974	+	G	T	G	T	T	T	G	G	T	G	G	T	T	T	T	T	T	T	T	T	T	G	T	T	T	T	T	G	T	G	T	T	G	T	G	G	T	G	T	G	T	G	G	G	T
S1B_286662978	C/T	1B	286662978	+	T	C	T	C	C	C	T	T	C	T	T	C	C	C	C	C	C	C	C	C	C	T	C	C	C	C	C	T	C	T	C	C	T	C	T	T	C	T	C	T	C	T	T	T	C
S1B_287143749	C/T	1B	287143749	+	T	C	T	C	C	C	T	T	C	T	T	C	C	C	C	C	C	C	C	C	C	T	C	C	C	C	C	T	C	T	C	C	T	C	T	T	C	T	C	T	C	T	T	T	C
S1B_287143751	C/G	1B	287143751	+	G	C	G	C	C	C	G	G	C	G	G	C	C	C	C	C	C	C	C	C	C	G	C	C	C	C	C	G	C	G	C	C	G	C	G	G	C	G	C	G	C	G	G	G	C
S1B_288194177	A/T	1B	288194177	+	A	A	A	A	A	A	A	A	A	A	A	A	A	A	A	A	A	A	A	W	A	A	A	A	A	W	A	A	A	A	A	A	A	A	W	A	W	A	A	A	A	A	A	A	A
S1B_288411144	T/C	1B	288411144	+	C	T	C	T	T	T	C	C	T	C	C	T	T	T	T	T	T	T	T	T	T	Y	T	T	T	T	T	C	T	C	T	T	C	T	C	C	T	C	T	C	T	C	C	C	T
S1B_288497485	T/C	1B	288497485	+	T	C	C	T	T	T	C	C	C	T	T	C	C	C	C	C	C	C	T	C	C	T	C	C	C	T	T	T	T	C	T	T	T	T	T	T	T	T	T	T	T	T	T	T	T
S1B_288497488	C/T	1B	288497488	+	C	T	C	C	C	C	T	T	T	C	C	T	T	T	T	C	T	T	C	T	T	C	T	T	T	C	C	C	C	C	C	C	C	C	C	C	C	C	C	C	C	C	C	C	C
S1B_288503769	C/T	1B	288503769	+	T	C	T	C	C	C	T	T	C	T	T	C	C	C	C	C	C	C	C	C	C	T	C	C	C	C	C	T	C	T	C	C	T	C	T	T	C	T	C	T	C	T	T	T	C
S1B_288729671	T/A	1B	288729671	+	A	T	A	T	T	T	A	A	T	A	A	T	T	T	T	T	T	T	T	T	T	A	T	T	T	T	T	W	T	A	T	T	A	T	A	A	T	A	T	A	T	A	A	A	T
S1B_289570144	A/C	1B	289570144	+	C	A	C	A	A	A	C	C	A	C	C	A	A	A	A	A	A	A	A	A	A	C	A	A	A	A	A	M	A	C	A	A	C	A	C	C	A	C	A	C	A	C	C	C	A
S1B_289570157	G/T	1B	289570157	+	G	G	G	G	T	G	G	G	G	G	G	G	G	G	G	G	G	G	T	G	G	G	T	T	T	G	G	G	G	G	G	G	G	G	G	G	G	G	G	G	G	G	G	G	G
S1B_289570326	C/T	1B	289570326	+	T	C	T	C	C	C	T	T	C	T	T	C	C	C	C	C	C	C	C	C	C	T	C	C	C	C	C	T	C	T	C	C	T	C	T	T	C	T	C	T	C	T	T	T	C
S1B_290805772	G/A	1B	290805772	+	G	G	G	A	G	G	R	G	G	G	G	G	G	G	G	R	G	G	G	G	G	G	G	G	G	G	G	G	G	G	G	R	G	G	G	G	A	G	G	G	R	G	G	G	R
S1B_290805791	G/A	1B	290805791	+	G	G	G	A	G	G	R	G	G	G	G	G	G	G	G	R	G	G	G	G	G	G	G	G	G	G	G	G	G	G	G	R	G	G	G	G	A	G	G	G	R	G	G	G	R
S1B_291751077	T/C	1B	291751077	+	C	T	C	T	T	T	C	C	T	C	C	T	T	T	T	T	T	T	Y	T	T	C	T	T	T	T	T	C	T	C	T	T	C	T	C	C	T	C	T	C	T	C	C	C	T
S1B_293134738	A/T	1B	293134738	+	T	A	T	A	A	A	T	T	A	T	T	A	A	A	A	A	A	A	A	A	A	W	A	A	A	A	A	T	A	T	A	A	T	A	T	T	A	T	A	T	A	T	T	T	A
S1B_294579283	G/A	1B	294579283	+	A	G	A	G	G	G	A	A	G	A	A	G	G	G	G	G	G	G	G	G	G	A	G	G	G	G	G	A	G	A	G	G	A	G	A	A	G	A	G	A	G	A	A	A	G
S1B_294579286	C/T	1B	294579286	+	C	C	C	C	T	C	C	C	C	C	C	C	C	C	C	C	C	C	T	C	C	C	T	T	T	C	C	C	C	C	C	C	C	C	C	C	C	C	C	C	C	C	C	C	C
S1B_298140121	G/C	1B	298140121	+	G	G	G	G	C	G	G	G	G	G	G	G	G	G	G	G	G	G	C	G	G	G	C	C	C	G	G	G	G	G	G	G	G	G	G	G	G	G	G	G	G	G	G	G	G
S1B_298140187	T/C	1B	298140187	+	Y	T	C	C	T	T	C	C	T	C	Y	T	T	T	C	Y	T	T	Y	T	T	Y	T	T	T	C	Y	Y	C	Y	T	T	Y	T	C	Y	Y	Y	T	C	T	C	T	C	T
S1B_298140202	G/A	1B	298140202	+	R	G	A	A	G	A	A	A	G	A	R	G	G	G	A	R	G	G	A	G	G	R	G	A	G	A	R	R	A	R	G	G	R	G	A	R	R	R	G	A	R	A	G	A	G
S1B_298871928	G/C	1B	298871928	+	G	G	G	G	C	G	G	G	G	G	G	G	G	G	G	G	G	G	C	G	G	G	C	C	C	G	G	G	G	G	G	G	G	G	G	G	G	G	G	G	G	G	G	G	G
S1B_298871937	G/T	1B	298871937	+	G	G	G	G	T	G	G	G	G	G	G	G	G	G	G	G	G	G	T	G	G	G	T	T	T	G	G	G	G	G	G	G	G	G	G	G	G	G	G	G	G	G	G	G	G
S1B_299360755	G/A	1B	299360755	+	R	G	R	G	G	G	G	R	G	R	G	G	G	G	G	R	G	G	G	G	G	G	G	G	G	G	A	G	G	G	G	G	G	G	G	G	G	G	G	G	G	G	G	G	G
S1B_299733165	A/G	1B	299733165	+	A	A	A	A	G	A	A	A	A	A	A	A	A	A	A	A	A	A	G	A	A	A	G	G	G	A	A	A	A	A	A	A	A	A	A	A	A	A	A	A	A	A	A	A	A
S1B_299733178	G/A	1B	299733178	+	G	G	G	G	A	G	G	G	G	G	G	G	G	G	G	G	G	G	A	G	G	G	A	A	A	G	G	G	G	G	G	G	G	G	G	G	G	G	G	G	G	G	G	G	G
S1B_302340192	C/T	1B	302340192	+	C	C	C	T	C	Y	C	C	Y	C	C	C	T	Y	T	C	C	C	T	C	C	C	Y	C	Y	C	C	C	Y	C	T	C	C	C	C	C	C	C	C	C	T	C	C	C	Y
S1B_302340212	C/T	1B	302340212	+	C	C	C	T	C	Y	C	C	C	C	C	C	T	C	T	C	C	C	T	C	C	C	Y	C	Y	C	C	C	Y	C	T	C	C	C	C	C	C	C	C	C	T	C	C	C	Y
S1B_304053320	A/G	1B	304053320	+	G	A	G	A	A	G	G	G	A	G	G	A	A	A	A	A	A	A	A	A	A	G	A	A	A	A	G	G	A	G	A	A	G	A	G	G	A	G	A	G	A	G	G	G	A
S1B_304053327	C/T	1B	304053327	+	T	C	T	C	C	C	T	T	C	T	T	C	C	C	C	C	C	C	C	C	C	T	C	C	C	C	T	T	C	T	C	C	T	C	T	T	C	T	C	T	C	T	T	T	C
S1B_306806668	A/G	1B	306806668	+	A	A	R	R	A	A	A	A	A	A	A	A	A	A	A	A	A	A	A	A	R	A	A	A	A	A	R	R	A	A	A	A	A	A	A	A	A	R	A	A	A	A	A	A	A
S1B_307613274	T/C	1B	307613274	+	C	T	C	T	T	T	C	C	T	C	C	T	T	T	T	T	T	T	T	T	T	C	T	T	T	T	C	C	T	C	T	T	C	T	C	C	T	C	T	C	T	C	C	C	T
S1B_307615940	A/G	1B	307615940	+	G	A	G	A	A	A	G	G	A	G	G	A	A	A	A	A	A	A	A	A	A	G	A	A	A	A	G	G	A	G	A	A	G	A	G	G	A	G	A	G	A	G	G	G	A
S1B_308151776	C/T	1B	308151776	+	T	C	T	C	C	C	C	C	C	C	C	C	C	C	C	C	C	C	C	C	C	C	C	C	C	C	C	C	C	C	C	C	C	C	C	C	C	C	C	C	C	T	C	C	C
S1B_311145603	G/A	1B	311145603	+	G	R	G	A	G	R	G	G	A	G	G	R	R	G	G	G	G	R	G	A	A	G	G	G	G	A	G	G	A	G	A	R	G	R	G	G	R	G	A	G	G	G	G	G	A
S1B_311145612	G/A	1B	311145612	+	G	R	G	A	G	R	G	G	A	G	G	R	R	G	G	G	G	R	G	A	A	G	G	G	G	A	G	G	A	G	A	R	G	R	G	G	R	G	A	G	G	G	G	G	A
S1B_311605091	C/A	1B	311605091	+	M	C	A	C	C	C	A	A	C	A	A	C	C	C	C	C	C	C	C	C	C	A	C	C	C	C	M	A	C	A	C	C	C	C	A	C	C	A	C	A	C	A	A	C	C
S1B_317233527	A/G	1B	317233527	+	G	A	G	A	G	A	G	G	A	G	G	A	A	A	A	A	A	A	G	A	A	G	G	G	G	A	G	G	A	G	A	A	G	A	G	G	A	G	A	G	A	G	G	G	A
S1B_318661620	G/T	1B	318661620	+	G	G	K	G	K	G	G	G	G	G	G	G	G	G	G	G	G	G	G	G	G	K	G	G	T	G	G	G	G	G	K	G	G	T	G	G	G	G	G	G	G	G	G	G	G
S1B_319745392	C/T	1B	319745392	+	T	C	T	C	C	C	T	T	C	T	T	C	C	C	C	C	C	C	C	C	C	T	C	C	C	C	T	T	C	T	C	C	T	C	T	T	C	T	C	T	C	T	T	T	C
S1B_321393571	A/G	1B	321393571	+	A	R	A	A	A	A	A	A	A	A	A	A	A	A	A	A	A	A	A	A	A	A	A	A	R	A	R	A	A	A	A	A	A	A	A	A	A	A	A	A	A	R	A	A	A
S1B_321393578	A/G	1B	321393578	+	A	R	A	R	A	A	R	A	A	A	A	A	A	A	R	R	A	A	A	R	A	A	R	A	R	A	A	A	A	A	A	A	R	A	R	A	A	A	A	A	A	A	A	A	A
S1B_321393583	T/C	1B	321393583	+	T	T	T	Y	T	T	T	T	T	T	T	T	T	Y	T	T	T	T	Y	T	T	T	T	T	T	T	Y	T	T	Y	Y	T	T	T	T	T	T	T	T	T	T	T	T	T	T
S1B_321393587	A/T	1B	321393587	+	A	A	A	A	W	A	A	W	A	W	A	A	A	A	A	A	A	A	A	A	A	A	A	A	A	W	A	A	A	A	A	A	A	A	W	W	A	W	A	A	A	A	A	A	A
S1B_321393591	T/C	1B	321393591	+	T	T	T	T	T	T	Y	T	T	T	T	T	T	T	T	T	Y	Y	T	T	T	Y	T	T	T	T	T	T	T	Y	T	Y	T	Y	T	T	Y	T	T	T	T	Y	C	T	Y
S1B_321393596	T/C	1B	321393596	+	T	Y	T	T	T	T	T	T	T	T	T	T	T	T	T	Y	T	T	T	T	T	T	Y	T	T	T	T	Y	T	T	T	T	Y	T	T	T	T	T	T	Y	T	Y	T	Y	T
S1B_321393604	T/C	1B	321393604	+	C	Y	T	T	T	Y	T	T	Y	T	T	T	T	T	T	T	Y	T	T	Y	T	Y	T	T	T	T	T	T	Y	T	T	Y	T	T	T	T	T	T	T	T	T	T	T	T	T
S1B_321393620	A/G	1B	321393620	+	A	A	A	A	A	A	A	A	R	A	A	A	A	A	A	A	A	A	A	A	A	A	R	A	A	A	A	R	R	A	A	A	R	R	A	A	A	A	A	R	A	A	A	A	A
S1B_323485825	G/T	1B	323485825	+	T	G	T	G	G	G	G	G	G	T	T	G	G	G	G	G	G	G	T	G	G	T	T	T	T	G	T	T	G	T	G	G	T	G	T	T	G	T	G	T	G	T	T	T	G
S1B_323485826	T/C	1B	323485826	+	C	T	C	T	T	T	T	T	T	C	C	T	T	T	T	T	T	T	C	T	T	C	C	C	C	T	C	C	T	C	T	T	C	T	C	C	T	C	T	C	T	C	C	C	T
S1B_327297910	G/A	1B	327297910	+	G	G	G	R	G	G	G	G	G	G	A	R	G	R	G	G	G	G	G	G	G	G	G	G	G	G	G	G	G	A	G	G	G	G	A	R	G	A	G	G	G	A	G	G	G
S1B_331073544	G/T	1B	331073544	+	G	G	G	G	G	G	G	G	G	G	T	G	G	G	G	G	G	G	T	G	G	G	T	T	T	G	G	G	G	T	G	G	G	G	T	G	G	T	G	G	G	G	G	G	G
S1B_331073562	T/C	1B	331073562	+	C	T	C	T	C	T	C	C	T	C	T	T	T	T	T	T	T	Y	T	T	Y	T	T	T	T	Y	C	C	T	T	T	T	C	T	T	C	T	T	T	C	T	C	C	C	T
S1B_332264212	T/A	1B	332264212	+	A	T	A	T	A	T	A	A	T	A	A	T	T	T	T	T	T	T	A	T	T	A	A	A	A	T	A	A	T	A	T	T	A	T	A	A	T	A	T	A	T	A	A	A	T
S1B_332271308	G/A	1B	332271308	+	A	G	R	G	R	G	R	R	G	R	A	G	G	G	G	G	G	G	R	G	G	A	A	A	A	G	R	R	G	A	G	G	A	G	A	A	G	A	G	A	G	A	A	R	G
S1B_333064814	T/C	1B	333064814	+	C	T	C	T	T	T	C	C	T	C	T	T	T	T	T	T	T	T	T	T	T	C	T	T	T	T	C	C	T	T	T	T	C	T	T	C	T	T	T	C	T	C	C	C	T
S1B_333614196	T/C	1B	333614196	+	T	T	T	T	T	T	T	T	T	T	T	T	T	T	T	T	T	T	T	T	T	T	T	T	T	T	T	T	T	Y	Y	Y	T	Y	T	T	T	T	Y	T	Y	T	T	T	T
S1B_333614201	T/G	1B	333614201	+	T	T	T	T	T	T	T	T	T	T	T	T	T	T	T	T	T	T	T	T	T	T	T	T	T	T	T	T	T	K	K	K	T	K	T	T	T	T	K	T	K	T	T	T	T
S1B_334108263	C/T	1B	334108263	+	T	C	T	C	T	C	T	T	C	T	T	C	C	C	C	C	C	C	T	C	C	T	T	T	T	C	T	T	C	Y	C	C	T	C	T	T	C	T	C	T	C	T	T	T	C
S1B_334414565	T/C	1B	334414565	+	C	T	C	T	C	T	C	C	T	C	C	T	T	T	T	T	T	T	C	T	T	C	C	C	C	T	C	C	T	C	T	T	C	T	C	C	T	C	T	C	T	C	C	C	T
S1B_335062144	A/G	1B	335062144	+	A	A	A	A	G	A	A	A	A	A	G	A	A	A	A	A	A	A	G	A	A	A	G	G	G	A	A	A	A	G	A	A	A	A	G	A	A	G	A	A	A	A	A	A	A
S1B_335230408	C/T	1B	335230408	+	C	C	C	C	T	C	C	C	C	C	T	C	C	C	C	C	C	C	T	C	C	C	T	T	T	C	C	C	C	T	C	C	C	C	T	C	C	T	C	C	C	C	C	C	C
S1B_335539729	T/C	1B	335539729	+	T	T	T	T	C	T	T	T	T	T	C	T	T	T	T	T	T	T	C	T	T	T	C	C	C	T	T	T	T	C	T	T	T	T	C	T	T	C	T	T	T	T	T	T	T
S1B_336629453	C/G	1B	336629453	+	C	C	C	C	G	C	C	C	C	C	G	C	C	C	C	C	C	C	G	C	C	C	G	G	G	C	C	C	C	G	C	C	C	C	G	C	C	G	C	C	C	C	C	C	C
S1B_337080370	C/G	1B	337080370	+	C	C	C	C	G	C	C	C	C	C	G	C	C	C	C	C	C	C	G	C	C	C	G	G	G	C	C	C	C	G	C	C	C	C	G	C	C	G	C	C	C	C	C	C	C
S1B_339823909	C/T	1B	339823909	+	C	C	C	Y	C	C	C	Y	C	C	C	C	C	C	C	C	C	C	C	C	Y	C	C	C	Y	C	C	C	C	C	C	C	C	C	C	C	C	C	C	C	Y	C	C	C	C
S1B_339823947	T/A	1B	339823947	+	T	T	T	W	T	T	T	W	T	T	T	T	T	T	T	T	T	T	T	T	W	T	T	T	W	T	T	T	T	T	T	T	T	T	T	T	T	T	T	T	W	T	T	T	T
S1B_340349202	G/A	1B	340349202	+	G	G	G	G	A	G	G	G	G	G	A	G	G	G	G	G	G	G	A	R	G	G	A	A	A	G	G	G	G	A	G	G	G	G	A	G	G	A	G	G	G	G	G	G	G
S1B_342436219	T/C	1B	342436219	+	T	T	T	T	C	Y	T	T	T	T	C	T	T	T	T	T	T	Y	C	T	T	Y	C	C	C	T	T	C	T	C	Y	Y	T	T	C	T	C	C	Y	T	Y	T	T	T	Y
S1B_342436251	A/G	1B	342436251	+	A	A	A	A	A	A	A	A	A	A	A	A	A	R	A	A	A	R	A	A	A	R	A	A	A	A	A	G	A	A	R	R	A	A	A	A	G	A	R	A	R	A	A	A	A
S1B_342436253	C/T	1B	342436253	+	C	C	C	C	T	C	C	C	C	C	T	C	C	C	C	C	C	Y	T	C	C	Y	T	T	T	C	C	T	C	T	Y	Y	C	C	T	C	T	T	Y	C	Y	C	C	C	Y
S1B_342609886	C/T	1B	342609886	+	C	C	C	C	T	C	C	C	C	C	T	C	C	C	C	C	C	C	T	C	C	C	T	T	T	C	C	C	C	T	C	C	C	C	T	C	C	T	C	C	C	C	C	C	C
S1B_346583718	C/T	1B	346583718	+	C	C	C	C	T	C	C	C	C	C	T	C	C	C	C	C	C	C	T	C	C	C	T	T	T	C	C	C	C	T	C	C	C	C	T	C	C	T	C	C	C	C	C	C	C
S1B_349543333	A/G	1B	349543333	+	G	A	G	A	A	A	R	A	A	R	A	A	A	A	A	A	A	A	A	A	A	G	A	A	A	A	G	R	A	A	A	A	R	A	A	R	A	A	A	G	A	G	G	G	A
S1B_349543336	G/A	1B	349543336	+	A	G	A	G	G	G	R	G	G	R	G	G	G	G	G	G	G	G	G	G	G	A	G	G	G	G	A	R	G	G	G	G	R	G	G	R	G	G	G	A	G	A	A	A	G
S1B_354697610	C/G	1B	354697610	+	C	C	C	C	G	C	C	C	C	C	G	C	C	C	C	C	C	C	G	C	C	C	S	G	G	C	C	C	C	G	C	C	C	C	G	C	C	G	C	C	C	C	C	C	C
S1B_355028921	T/C	1B	355028921	+	T	T	T	T	C	T	T	T	T	T	C	T	T	T	T	T	T	T	C	T	T	T	C	C	C	T	T	T	T	C	T	T	T	T	C	T	T	C	T	Y	T	T	T	T	T
S1B_355210688	T/C	1B	355210688	+	T	T	T	T	C	T	T	T	T	T	C	T	T	T	T	T	T	T	C	T	Y	T	C	C	C	T	T	T	T	C	T	T	T	T	C	T	T	C	T	T	T	T	T	T	T
S1B_355673670	C/T	1B	355673670	+	C	C	C	C	T	C	C	C	C	C	T	C	C	C	C	C	C	C	T	C	C	C	T	T	T	C	C	C	C	T	C	C	C	C	T	C	C	T	C	C	C	C	C	C	C
S1B_355734254	G/C	1B	355734254	+	G	G	G	G	S	S	G	G	S	S	G	G	S	G	G	G	G	G	G	G	G	G	G	G	G	G	G	G	G	G	G	G	G	G	G	G	G	G	G	G	G	S	G	G	S
S1B_362361441	G/T	1B	362361441	+	G	G	G	G	G	G	G	G	G	G	G	G	G	G	G	G	G	T	G	G	G	G	G	G	G	G	K	G	G	G	K	K	G	G	G	G	G	G	G	G	G	G	G	G	G
S1B_363138419	G/C	1B	363138419	+	C	G	C	G	G	G	C	C	G	C	G	G	G	G	G	G	G	G	G	G	G	C	G	G	G	G	C	C	G	G	G	G	C	G	G	C	G	G	G	C	G	C	C	C	G
S1B_363572875	C/G	1B	363572875	+	C	C	C	C	C	C	C	C	C	C	C	S	C	S	C	S	C	C	C	C	S	C	C	C	C	C	C	C	C	C	C	C	C	C	C	S	C	C	C	C	C	C	C	C	C
S1B_363572876	C/G	1B	363572876	+	C	C	C	C	C	C	C	C	C	S	C	C	C	S	S	C	C	C	C	C	C	C	C	C	C	S	C	C	C	C	S	C	C	C	C	C	C	C	C	C	C	C	S	C	S
S1B_363583067	C/T	1B	363583067	+	T	C	T	C	T	C	T	T	C	T	T	C	C	C	C	C	C	C	T	C	C	T	T	T	T	C	T	T	C	T	C	C	T	C	T	T	C	T	C	T	C	T	T	T	C
S1B_363583078	C/A	1B	363583078	+	A	C	A	C	C	C	A	A	C	A	C	C	C	C	C	C	C	C	C	C	C	A	C	C	C	C	A	A	C	C	C	C	A	C	C	A	C	C	C	A	C	A	A	A	C
S1B_363769366	G/A	1B	363769366	+	A	G	A	G	A	G	A	A	G	A	A	G	G	G	G	G	G	G	A	G	G	A	A	A	A	G	A	A	G	A	G	G	A	G	A	A	G	A	G	A	G	A	A	A	G
S1B_363769406	C/T	1B	363769406	+	C	C	C	C	T	C	C	C	C	C	T	C	C	C	C	C	C	C	T	C	C	C	T	T	T	C	C	C	C	T	C	C	C	C	T	C	C	T	C	C	C	C	C	C	C
S1B_365320437	C/T	1B	365320437	+	T	C	T	C	T	C	T	T	C	T	T	C	C	C	C	C	C	C	T	C	C	T	T	T	T	C	T	T	C	T	C	C	T	C	T	T	C	T	C	T	C	T	T	T	C
S1B_365329412	A/G	1B	365329412	+	A	A	A	A	G	A	A	A	A	A	G	A	A	A	A	A	A	A	G	A	A	A	G	G	G	A	A	A	A	G	A	A	A	A	G	A	A	G	A	A	A	R	A	A	A
S1B_366021552	T/G	1B	366021552	+	G	T	G	T	G	T	G	G	T	G	G	T	T	T	T	T	T	T	G	T	T	G	G	G	G	T	G	G	T	G	T	T	G	T	G	G	T	G	T	G	T	G	G	G	T
S1B_366396582	C/G	1B	366396582	+	G	C	G	C	C	C	G	G	C	G	C	C	C	C	C	C	C	C	C	C	C	G	C	C	C	C	G	G	C	C	C	C	G	C	C	G	C	C	C	G	C	G	G	G	C
S1B_366440932	A/G	1B	366440932	+	A	R	A	A	A	A	A	A	A	A	A	A	A	R	A	A	A	R	A	A	A	A	A	A	A	A	R	A	A	A	A	R	A	A	A	A	A	A	R	A	A	A	R	A	A
S1B_366440933	T/G	1B	366440933	+	T	K	T	T	T	T	T	T	T	T	T	T	T	K	T	T	T	K	T	T	T	T	T	T	T	T	K	T	T	T	T	K	T	T	T	T	T	T	K	T	T	T	K	T	T
S1B_367017538	A/C	1B	367017538	+	M	A	C	A	A	A	C	A	A	C	A	A	A	A	A	A	M	C	A	A	A	M	A	C	A	A	A	M	A	C	A	A	M	A	C	M	A	C	C	C	A	M	M	C	A
S1B_367017548	G/A	1B	367017548	+	R	G	R	G	G	G	A	G	G	A	G	G	G	G	G	G	G	G	G	G	G	G	G	G	G	G	G	R	G	G	G	G	R	G	G	R	G	G	G	A	G	R	R	G	G
S1B_367017581	T/G	1B	367017581	+	T	T	K	T	T	T	T	T	T	T	T	T	T	T	T	T	K	G	T	T	T	K	T	G	T	T	T	T	T	G	T	T	T	T	G	T	T	T	G	T	T	T	T	G	T
S1B_369271024	C/T	1B	369271024	+	T	C	T	C	T	C	T	T	C	T	T	C	C	C	C	C	C	C	T	C	C	T	T	T	T	C	T	T	C	T	C	C	T	C	T	T	C	T	C	T	C	T	T	T	C
S1B_369589917	C/T	1B	369589917	+	C	C	C	C	C	C	C	C	C	C	C	Y	C	C	C	C	Y	C	C	C	Y	C	C	C	C	Y	C	C	C	C	C	Y	C	C	C	C	C	C	Y	C	C	C	C	C	C
S1B_369944546	G/A	1B	369944546	+	G	G	G	G	G	G	G	G	G	G	G	G	G	G	G	G	G	G	G	G	G	G	G	G	G	G	G	G	G	G	G	G	G	A	G	G	G	G	A	G	G	G	G	G	A
S1B_370926995	T/G	1B	370926995	+	T	T	T	T	G	T	T	T	T	T	G	T	T	T	T	T	T	T	G	T	T	T	G	G	G	T	T	T	T	G	T	T	T	T	G	T	T	G	T	T	T	T	T	T	T
S1B_376101676	G/A	1B	376101676	+	G	G	G	G	A	G	G	G	G	G	A	G	G	G	G	G	G	G	A	G	G	G	A	A	A	G	G	G	G	A	G	G	G	G	A	G	G	A	G	G	G	G	G	G	G
S1B_377199255	G/C	1B	377199255	+	G	G	G	G	G	G	G	G	S	G	G	G	G	S	G	G	G	G	G	G	G	S	G	G	G	G	G	G	G	G	G	G	G	G	G	G	G	G	S	G	G	G	S	G	S
S1B_377200533	C/T	1B	377200533	+	C	C	C	C	T	C	C	C	C	C	T	C	C	C	C	C	C	C	T	C	C	C	T	T	T	C	C	C	C	T	C	C	C	C	T	C	C	T	C	C	C	C	C	C	C
S1B_379293194	G/T	1B	379293194	+	G	G	G	G	G	G	G	G	G	G	K	G	G	G	K	G	G	G	G	G	K	G	K	G	K	G	G	G	K	G	K	G	G	G	G	K	G	T	G	G	G	G	G	G	G
S1B_379293210	G/T	1B	379293210	+	G	G	G	G	G	G	G	G	G	K	G	G	G	G	G	G	K	G	G	G	G	G	G	G	K	G	G	G	G	G	G	G	G	G	G	K	G	G	G	G	G	G	G	G	G
S1B_379293212	A/T	1B	379293212	+	A	A	A	A	A	A	A	A	A	A	A	A	A	A	A	A	W	A	A	A	A	A	A	A	A	W	A	A	A	A	A	A	A	A	A	W	A	A	A	A	A	A	A	A	W
S1B_379293240	G/A	1B	379293240	+	G	R	G	G	G	G	G	R	G	G	G	G	G	G	R	G	R	G	G	G	G	R	G	G	G	G	G	G	G	G	G	G	G	G	G	G	G	G	G	G	G	G	G	G	G
S1B_379298878	T/A	1B	379298878	+	T	T	W	T	T	T	T	T	W	T	W	T	W	T	T	T	T	T	W	T	T	W	T	T	T	T	W	T	T	T	T	T	T	T	W	T	T	W	T	W	W	T	T	W	T
S1B_379298879	C/A	1B	379298879	+	C	C	C	C	C	C	M	C	C	C	C	C	C	C	C	C	M	C	C	M	C	C	C	C	C	C	C	C	C	C	C	C	C	C	C	C	C	C	C	C	C	C	M	C	M
S1B_379298904	T/C	1B	379298904	+	T	T	T	T	T	T	T	T	T	T	T	T	T	T	T	T	T	T	T	T	T	Y	T	T	T	T	T	Y	T	T	T	T	T	Y	T	Y	T	T	Y	T	T	Y	T	Y	T
S1B_379298907	G/C	1B	379298907	+	S	G	G	S	G	G	G	G	G	S	G	S	G	S	S	G	S	G	G	G	G	G	G	G	G	G	G	G	G	G	G	S	G	S	G	G	G	G	G	G	G	S	G	G	G
S1B_379298913	G/C	1B	379298913	+	G	G	G	G	S	G	G	G	S	G	S	G	S	G	G	G	G	G	S	G	G	G	G	G	G	G	C	G	G	G	G	G	G	G	S	G	G	G	G	S	G	S	G	S	G
S1B_380989590	G/C	1B	380989590	+	G	G	G	G	C	G	G	G	G	G	C	G	G	G	G	G	G	G	C	G	G	G	C	C	C	G	G	G	G	C	G	G	G	G	C	G	G	C	G	G	G	G	G	G	G
S1B_380989591	T/G	1B	380989591	+	T	T	T	T	G	T	T	T	T	T	G	T	T	T	T	T	T	T	G	T	T	T	G	G	G	T	T	T	T	G	T	T	T	T	G	T	T	G	T	T	T	T	T	T	T
S1B_380989627	G/A	1B	380989627	+	G	G	G	G	A	G	G	G	G	G	A	G	G	G	G	G	G	G	A	G	G	G	A	A	A	G	G	G	G	A	G	G	G	G	A	G	G	A	G	G	G	G	G	G	G
S1B_383970956	A/G	1B	383970956	+	A	A	A	A	G	A	A	A	A	A	G	A	A	A	A	A	A	A	G	A	A	A	G	G	G	A	A	A	A	G	A	A	A	A	G	A	A	G	A	A	A	A	A	A	A
S1B_383971234	C/A	1B	383971234	+	C	C	C	C	A	C	C	C	C	C	A	C	C	C	C	C	C	C	A	C	C	C	A	A	A	C	C	C	C	A	C	C	C	C	A	C	C	A	C	C	C	C	C	C	C
S1B_384884098	T/C	1B	384884098	+	T	T	T	T	C	T	T	T	T	T	C	T	T	T	T	T	T	T	C	T	T	T	C	Y	C	T	T	T	T	C	T	T	T	T	C	T	T	C	T	T	T	T	T	T	T
S1B_385226481	C/T	1B	385226481	+	C	C	C	C	C	C	C	C	C	C	C	C	C	C	C	C	C	C	C	C	C	C	C	C	Y	C	C	T	Y	C	C	C	C	C	C	C	C	C	C	C	C	C	C	C	C
S1B_386488566	C/T	1B	386488566	+	C	C	C	C	C	C	C	C	C	C	C	C	C	C	C	C	C	C	C	C	C	C	C	C	C	C	C	C	C	C	C	C	C	C	C	C	C	C	C	C	C	C	C	C	C
S1B_386523501	A/G	1B	386523501	+	A	A	A	A	G	A	A	A	A	A	G	A	A	A	A	A	A	A	G	A	A	A	G	G	G	A	A	A	A	G	A	A	A	A	G	A	A	G	A	A	A	A	A	A	A
S1B_391187921	C/T	1B	391187921	+	C	C	C	C	C	C	C	C	C	C	C	C	C	C	C	C	C	C	C	C	C	C	C	C	C	C	C	C	C	C	C	C	C	C	C	C	C	C	C	C	C	C	C	C	C
S1B_391245692	G/C	1B	391245692	+	G	G	G	G	C	G	G	G	G	G	C	G	G	G	G	G	G	G	C	G	G	G	C	C	C	G	G	G	G	C	G	G	G	G	C	G	G	C	G	G	G	G	G	G	G
S1B_391685238	G/A	1B	391685238	+	G	G	G	G	G	R	G	G	G	R	G	G	R	G	R	R	G	G	G	G	R	A	G	G	G	R	G	G	G	R	G	G	G	G	G	G	G	G	G	R	G	R	G	R	G
S1B_392287454	T/G	1B	392287454	+	T	T	T	T	G	T	T	T	T	T	G	T	T	T	T	T	T	T	G	T	T	T	G	G	G	T	T	T	T	G	T	T	T	T	G	T	T	G	T	T	T	T	T	T	T
S1B_392811014	A/G	1B	392811014	+	A	A	A	A	A	A	A	A	A	A	A	A	A	A	A	A	A	R	A	A	A	A	A	A	A	A	R	A	A	A	R	R	A	A	A	R	A	A	G	A	A	A	A	A	A
S1B_392811036	A/G	1B	392811036	+	A	A	A	A	G	A	A	A	A	A	G	A	A	A	A	A	A	R	G	A	A	A	G	G	G	A	R	A	A	G	R	R	A	A	G	R	A	G	G	A	A	A	A	A	A
S1B_393305843	T/A	1B	393305843	+	T	W	T	T	T	T	T	T	T	T	W	T	T	T	T	T	T	T	W	T	T	T	T	T	T	T	T	W	W	T	T	T	T	W	T	T	T	T	T	T	W	T	T	T	A
S1B_394142777	A/G	1B	394142777	+	A	A	A	A	G	A	A	A	A	A	G	A	A	A	A	A	A	A	G	A	A	A	G	G	G	A	A	A	A	G	A	A	A	A	G	A	A	G	A	A	A	A	A	A	A
S1B_394630358	C/T	1B	394630358	+	C	C	C	C	C	C	C	C	C	C	C	C	C	C	C	C	C	C	C	C	C	C	T	C	C	C	C	C	C	C	C	C	C	C	C	C	C	C	C	C	C	C	C	C	C
S1B_395969784	C/T	1B	395969784	+	T	C	T	C	C	C	T	T	C	T	C	C	C	C	T	T	C	C	C	C	C	T	C	C	C	C	T	T	C	C	C	C	T	C	C	T	C	C	C	T	C	T	T	T	C
S1B_396030549	G/T	1B	396030549	+	T	G	T	G	G	G	T	T	G	T	G	G	G	G	T	T	G	G	G	G	G	T	G	G	G	G	T	T	G	G	G	G	T	G	G	T	G	G	G	T	G	T	T	T	G
S1B_396146043	G/A	1B	396146043	+	G	G	G	A	G	G	R	G	G	G	G	G	G	G	G	R	R	G	A	R	G	R	A	A	A	G	G	R	R	G	G	G	R	G	G	G	G	G	G	R	G	G	G	G	G
S1B_396263587	T/C	1B	396263587	+	C	T	C	T	T	T	C	C	T	C	Y	T	T	T	C	C	T	T	T	T	T	C	T	T	T	T	C	C	T	T	T	T	C	T	T	C	T	T	T	C	T	C	C	C	T
S1B_396588591	C/T	1B	396588591	+	C	C	C	C	T	C	C	C	C	C	T	C	C	C	C	C	C	C	T	C	C	C	T	T	T	C	C	C	C	T	C	C	C	C	T	C	C	T	C	C	C	C	C	C	C
S1B_397390226	G/A	1B	397390226	+	G	G	G	G	A	G	G	G	G	G	A	G	G	G	G	G	G	G	A	G	G	G	A	A	A	G	G	G	G	A	G	G	G	G	A	G	G	A	G	G	G	G	G	G	G
S1B_398111204	A/C	1B	398111204	+	A	A	A	A	C	A	A	A	A	A	C	A	A	A	A	A	A	A	C	A	A	A	C	C	C	A	A	A	A	C	A	A	A	A	C	A	A	C	A	A	A	A	A	A	A
S1B_398394555	G/T	1B	398394555	+	G	G	G	G	T	G	G	G	G	G	T	G	G	G	G	G	G	G	T	G	G	G	T	T	T	G	G	G	G	T	G	G	G	G	T	G	G	T	G	G	G	G	G	G	G
S1B_398394562	C/T	1B	398394562	+	C	C	C	C	T	C	C	C	C	C	T	C	C	C	C	C	C	C	T	C	C	C	T	T	T	C	C	C	C	T	C	C	C	C	T	C	C	T	C	C	C	C	C	C	C
S1B_398491404	T/A	1B	398491404	+	A	T	A	T	T	T	A	A	T	A	T	T	T	T	A	A	T	T	T	T	T	A	T	T	T	T	A	A	T	T	T	T	A	T	T	A	T	T	T	A	T	A	A	A	T
S1B_398788237	C/G	1B	398788237	+	C	C	C	C	C	C	C	C	C	C	C	C	C	C	C	C	C	C	S	C	G	C	C	C	C	C	C	C	C	C	C	C	C	C	C	C	C	S	C	C	C	C	C	C	C
S1B_399375622	T/G	1B	399375622	+	T	T	T	T	T	T	T	T	T	T	T	T	K	T	K	T	T	T	G	G	T	T	T	T	T	T	T	T	T	T	K	T	K	T	K	K	T	T	K	T	T	T	G	K	T
S1B_399848378	T/C	1B	399848378	+	T	T	T	T	T	Y	Y	Y	T	T	T	T	T	T	Y	T	T	Y	T	T	T	Y	T	T	T	T	T	T	T	T	T	T	T	T	T	T	T	T	Y	T	T	Y	T	T	T
S1B_399848414	G/A	1B	399848414	+	G	G	G	G	G	R	G	G	G	G	G	G	G	G	G	G	G	R	G	G	G	G	G	G	G	G	G	G	G	G	G	G	G	G	G	G	G	G	R	G	G	G	G	G	G
S1B_400421446	G/C	1B	400421446	+	C	G	C	G	C	G	C	C	G	C	C	G	G	G	C	C	G	G	C	G	G	C	C	C	C	G	C	C	G	C	G	G	C	G	C	C	G	C	G	C	G	C	C	C	G
S1B_400898876	C/T	1B	400898876	+	C	C	C	C	C	C	C	C	C	C	C	C	C	C	C	C	C	C	C	C	C	C	C	C	C	C	C	C	C	C	C	C	C	C	C	C	C	C	C	C	C	C	C	C	C
S1B_401990983	G/A	1B	401990983	+	R	G	A	G	A	G	A	A	G	A	A	G	G	G	A	A	G	G	A	G	G	A	A	A	A	G	A	A	G	A	G	G	A	G	A	A	G	A	G	A	G	A	A	A	G
S1B_401990989	C/A	1B	401990989	+	C	C	C	C	C	C	C	C	C	C	C	C	C	C	C	C	C	C	C	C	C	C	C	C	C	C	C	C	C	C	C	C	C	C	C	C	C	C	C	C	C	C	C	C	C
S1B_403180886	G/A	1B	403180886	+	G	A	G	A	G	A	G	G	A	G	G	R	R	R	G	G	G	A	G	A	A	G	G	G	G	A	G	G	A	G	A	G	G	R	G	G	G	G	R	G	A	G	G	G	R
S1B_403451816	T/C	1B	403451816	+	C	T	C	T	C	T	C	C	T	C	C	T	T	T	C	C	T	T	C	T	T	C	C	C	C	T	C	C	T	C	T	T	C	T	C	C	T	C	T	C	T	C	C	C	T
S1B_403821660	A/T	1B	403821660	+	A	W	A	A	A	A	A	A	A	A	A	A	A	A	A	A	A	A	A	A	W	A	W	A	A	A	A	A	A	A	A	A	A	A	A	A	W	A	W	A	A	A	A	A	A
S1B_403996730	G/A	1B	403996730	+	G	G	G	G	A	G	G	G	G	G	A	G	G	G	G	G	G	G	A	G	G	G	A	A	A	G	G	G	G	A	G	G	G	G	A	G	G	A	G	G	G	G	G	G	G
S1B_404847940	C/T	1B	404847940	+	C	C	C	C	T	C	C	C	C	C	T	C	C	C	C	C	C	C	T	C	C	C	T	T	T	C	C	C	C	T	C	C	C	C	T	C	C	T	C	C	C	C	C	C	C
S1B_405340462	G/A	1B	405340462	+	G	G	G	G	A	G	G	G	G	G	A	G	G	G	G	G	G	G	A	G	G	G	A	A	A	G	G	G	G	A	G	G	G	G	A	G	G	A	G	G	G	G	G	G	G
S1B_405340467	A/T	1B	405340467	+	A	A	A	A	T	A	A	A	A	A	T	A	A	A	A	A	A	A	T	A	A	A	T	T	T	A	A	A	A	T	A	A	A	A	T	A	A	T	A	A	A	A	A	A	A
S1B_405611244	T/C	1B	405611244	+	T	T	T	T	T	T	T	Y	T	T	T	T	T	Y	T	T	T	T	T	T	T	T	T	T	T	Y	T	Y	T	T	T	T	Y	T	T	T	T	T	T	T	T	T	T	Y	T
S1B_406303256	C/T	1B	406303256	+	C	C	C	C	T	C	C	C	C	C	T	C	C	C	C	C	C	C	T	C	C	C	T	T	T	C	C	C	C	T	C	C	C	C	T	C	C	T	C	C	C	C	C	C	C
S1B_406578863	G/A	1B	406578863	+	A	G	R	G	G	G	G	R	G	R	G	G	G	G	G	R	G	G	G	G	G	R	G	G	G	G	R	G	A	G	G	G	R	G	G	R	G	G	G	G	G	R	R	A	G
S1B_408019488	G/A	1B	408019488	+	A	G	A	G	G	G	A	A	G	A	G	G	G	G	A	A	G	G	G	G	G	A	G	G	G	G	A	A	A	G	G	G	R	G	G	A	G	G	G	A	G	A	A	A	G
S1B_408019531	C/T	1B	408019531	+	T	C	T	C	T	C	T	T	C	T	T	C	C	C	T	T	C	C	T	C	C	T	T	T	T	C	T	T	T	T	C	C	T	C	T	T	C	T	C	T	C	T	T	T	C
S1B_408088673	G/T	1B	408088673	+	T	G	T	G	T	G	T	T	G	T	T	G	G	G	T	T	G	G	T	G	G	T	T	T	T	G	T	T	T	T	G	G	T	G	T	T	G	T	G	T	G	T	T	T	G
S1B_409157267	C/T	1B	409157267	+	Y	C	T	C	T	C	T	T	C	T	T	C	C	C	T	T	C	C	T	C	C	T	T	T	T	C	T	T	T	T	C	C	T	C	T	T	C	T	C	T	C	T	T	T	C
S1B_409159314	T/C	1B	409159314	+	C	T	C	T	C	T	C	C	T	C	C	T	T	T	C	C	T	T	C	T	T	C	C	C	C	T	C	C	C	C	T	T	C	T	C	C	T	C	T	C	T	C	C	C	T
S1B_410270188	T/C	1B	410270188	+	T	T	T	T	T	T	T	T	T	T	T	T	T	T	T	T	T	Y	T	T	T	T	T	T	T	T	Y	T	T	T	T	Y	T	T	T	Y	T	T	Y	T	T	T	T	T	T
S1B_411440298	G/A	1B	411440298	+	A	G	A	G	G	G	A	A	G	A	G	G	G	G	A	A	G	G	G	G	G	A	G	G	G	G	A	A	A	G	G	G	A	G	G	A	G	G	G	A	G	A	A	A	G
S1B_411984442	C/T	1B	411984442	+	T	C	T	C	C	C	T	T	C	T	C	C	C	C	T	T	C	C	C	C	C	T	C	C	C	C	T	T	T	C	C	C	T	C	C	T	C	C	C	T	C	T	T	T	C
S1B_411987306	A/G	1B	411987306	+	A	A	A	A	G	A	A	A	A	A	G	A	A	A	A	A	A	A	G	A	A	A	G	G	G	A	A	A	A	G	A	A	A	A	G	A	A	G	A	A	A	A	A	A	A
S1B_411996050	C/T	1B	411996050	+	C	C	C	C	T	C	C	C	C	C	T	C	C	C	C	C	C	C	T	C	C	C	T	T	T	C	C	C	C	T	C	C	C	C	T	C	C	T	C	C	C	C	C	C	C
S1B_413555089	G/A	1B	413555089	+	G	G	G	G	G	G	G	G	G	G	G	G	G	G	G	G	G	G	G	G	G	G	G	G	G	G	R	G	G	G	R	R	G	G	G	R	G	G	R	G	G	G	G	G	G
S1B_415243050	G/C	1B	415243050	+	C	G	C	G	G	G	C	C	G	C	G	G	G	G	C	C	G	G	G	G	G	C	G	G	G	G	C	C	C	G	G	G	C	G	G	C	G	G	G	C	G	C	C	C	G
S1B_415539322	C/T	1B	415539322	+	T	C	T	C	C	C	T	T	C	T	C	C	C	C	T	T	C	Y	C	C	C	T	C	C	C	C	T	T	T	C	Y	Y	T	C	C	T	C	C	Y	T	C	T	T	T	C
S1B_415539323	T/C	1B	415539323	+	C	T	C	T	T	T	C	C	T	C	T	T	T	T	C	C	T	Y	T	T	T	C	T	T	T	T	C	C	C	T	Y	Y	C	T	T	C	T	T	Y	C	T	C	C	C	T
S1B_415539344	C/T	1B	415539344	+	C	C	C	C	C	C	C	C	C	C	C	C	C	C	C	C	C	Y	C	C	C	C	C	C	C	C	Y	C	C	C	Y	Y	C	C	C	Y	C	C	Y	C	C	C	C	C	C
S1B_415610232	C/G	1B	415610232	+	G	C	G	C	C	C	G	G	C	G	C	C	C	C	G	G	C	C	C	C	C	G	C	C	C	C	G	G	G	C	C	C	G	C	C	G	C	C	C	G	C	G	G	G	C
S1B_415610242	G/A	1B	415610242	+	A	G	A	G	G	G	A	A	G	A	G	G	G	G	A	A	G	G	G	G	G	A	G	G	G	G	A	A	A	G	G	G	A	G	G	A	G	G	G	A	G	A	A	A	G
S1B_415610269	C/T	1B	415610269	+	T	C	T	C	C	C	T	T	C	T	C	C	C	C	T	T	C	C	C	C	C	T	C	C	C	C	T	T	T	C	C	C	T	C	C	T	C	C	C	T	C	T	T	T	C
S1B_415620662	C/A	1B	415620662	+	A	C	A	C	C	C	A	A	C	A	C	C	C	C	A	A	C	C	C	C	C	A	C	C	C	C	A	A	A	C	C	C	A	C	C	A	C	C	C	A	C	A	A	A	C
S1B_415737511	T/C	1B	415737511	+	Y	T	T	T	T	T	T	T	T	T	T	T	T	T	T	T	T	Y	T	T	T	T	T	T	Y	T	T	T	T	T	T	T	T	T	T	T	T	T	T	T	T	T	T	T	T
S1B_416610261	G/A	1B	416610261	+	G	G	G	G	A	G	G	G	G	G	G	G	G	G	G	G	G	G	A	G	G	G	A	A	A	G	G	G	G	G	G	G	G	G	G	G	G	G	G	G	G	G	G	G	G
S1B_422713190	C/T	1B	422713190	+	T	C	T	C	C	T	T	T	C	T	C	C	C	C	T	T	C	C	C	C	C	T	C	C	C	C	T	T	T	C	C	C	T	C	C	T	C	C	C	T	C	T	T	T	C
S1B_422714010	T/C	1B	422714010	+	C	T	C	T	T	T	C	C	T	C	T	T	T	T	C	C	T	T	T	T	T	C	T	T	T	T	C	C	C	T	T	T	C	T	T	C	T	T	T	C	T	C	C	C	T
S1B_422714463	T/A	1B	422714463	+	T	W	T	W	T	W	W	T	T	T	T	T	T	T	T	T	T	T	T	T	T	T	T	T	T	T	T	T	T	T	W	T	T	T	W	T	W	T	T	T	T	T	T	T	T
S1B_423984797	T/A	1B	423984797	+	T	T	T	T	T	W	T	T	T	W	T	T	T	T	W	T	T	T	T	T	T	T	T	T	T	W	T	W	W	W	T	T	T	T	T	T	T	W	W	T	T	T	T	W	T
S1B_423990043	G/C	1B	423990043	+	C	G	C	G	G	G	C	C	G	C	G	G	G	G	C	C	G	G	G	G	G	C	G	G	G	G	C	C	C	G	G	G	C	G	G	C	G	G	G	C	G	C	C	C	G
S1B_425679460	C/T	1B	425679460	+	T	C	T	Y	C	C	T	T	C	T	C	C	C	C	T	Y	T	C	C	C	C	T	C	C	Y	C	T	T	Y	C	C	C	T	T	C	T	C	C	Y	T	C	T	T	T	C
S1B_425884505	G/A	1B	425884505	+	A	G	A	G	G	G	A	A	G	A	G	G	G	G	A	A	G	G	G	G	G	A	G	G	G	G	A	A	A	G	G	G	A	G	G	A	G	G	G	A	G	A	A	A	G
S1B_426596419	A/C	1B	426596419	+	C	A	C	A	C	A	C	C	A	C	A	A	A	A	C	C	A	A	C	A	A	C	C	C	C	A	C	C	C	A	A	A	C	A	A	C	A	A	A	C	A	C	C	C	A
S1B_426596440	T/C	1B	426596440	+	C	T	C	T	T	T	C	C	T	C	T	T	T	T	C	C	T	T	T	T	T	C	T	T	T	T	C	C	C	T	T	T	C	T	T	C	T	T	T	C	T	C	C	C	T
S1B_426767307	T/C	1B	426767307	+	C	T	C	T	T	T	C	C	T	C	T	T	T	T	C	C	T	T	T	T	T	C	T	T	T	T	C	C	C	T	T	T	C	T	T	C	T	T	T	C	T	C	C	C	T
S1B_426767335	T/C	1B	426767335	+	C	T	C	T	C	T	C	C	T	C	T	T	T	T	C	C	T	T	C	T	T	C	C	C	C	T	C	C	C	T	T	T	C	T	T	C	T	T	T	C	T	C	C	C	T
S1B_426998819	A/G	1B	426998819	+	G	A	G	A	A	A	G	G	A	G	A	A	A	A	G	G	A	A	A	A	A	G	A	A	A	A	G	G	G	A	A	A	G	A	A	G	A	A	A	G	A	G	G	G	A
S1B_428453743	C/T	1B	428453743	+	C	C	C	C	T	C	C	C	C	C	C	C	C	C	C	C	C	C	T	C	C	C	T	T	T	C	C	C	C	C	C	C	C	C	C	C	C	C	C	C	C	C	C	C	C
S1B_428906599	G/C	1B	428906599	+	G	G	G	G	G	G	G	G	G	G	G	G	G	G	G	G	G	G	C	G	G	G	C	C	C	G	G	G	G	G	G	G	G	G	G	G	G	G	G	G	G	G	G	G	G
S1B_432325794	T/C	1B	432325794	+	C	T	C	T	T	T	C	C	T	C	T	T	T	T	C	C	T	T	T	Y	T	C	T	T	T	T	C	C	C	T	T	T	C	T	T	C	T	T	T	C	T	C	C	C	T
S1B_432335967	T/C	1B	432335967	+	C	T	C	T	C	T	C	C	T	C	T	T	T	T	C	C	T	T	C	T	T	C	C	C	C	T	C	Y	C	T	T	T	C	T	T	C	T	T	T	C	T	C	C	C	T
S1B_432335989	T/C	1B	432335989	+	C	T	C	T	C	T	C	C	T	C	T	T	T	T	C	C	T	T	C	T	T	C	C	C	C	T	C	Y	C	T	T	T	C	T	T	C	T	T	T	C	T	C	C	C	T
S1B_432359593	G/A	1B	432359593	+	A	G	A	G	G	G	A	A	G	A	G	G	G	G	A	A	G	G	G	G	G	A	G	G	G	G	A	A	A	G	G	G	A	G	G	A	G	G	G	A	G	A	A	A	G
S1B_433405358	A/G	1B	433405358	+	G	A	G	A	G	A	G	G	A	G	R	A	A	A	G	G	A	A	G	A	A	G	G	G	G	A	G	G	G	R	A	A	G	A	R	G	A	R	A	G	A	G	G	G	A
S1B_433405359	C/T	1B	433405359	+	T	C	T	C	T	C	T	T	C	T	Y	C	C	C	T	T	C	C	T	C	C	T	T	T	T	C	T	T	T	Y	C	C	T	C	Y	T	C	Y	C	T	C	T	T	T	C
S1B_433405400	T/C	1B	433405400	+	T	T	T	T	T	T	T	T	T	T	Y	T	T	T	T	T	T	T	Y	T	T	T	T	T	T	T	T	T	T	Y	T	T	T	T	Y	T	T	Y	T	T	T	T	T	Y	T
S1B_433405406	G/A	1B	433405406	+	G	G	G	G	G	G	G	G	G	G	R	G	G	G	G	G	G	G	G	G	G	G	G	G	G	G	G	G	G	R	G	G	G	G	R	G	G	R	G	G	G	G	G	G	G
S1B_433417808	A/G	1B	433417808	+	G	A	G	A	A	A	G	G	A	G	A	A	A	A	G	G	A	A	A	A	A	G	A	A	A	R	G	G	G	A	A	A	G	A	A	G	A	A	A	G	A	G	G	G	A
S1B_433643582	G/A	1B	433643582	+	A	G	A	G	G	G	A	A	G	A	G	G	G	G	A	A	G	G	G	G	G	A	G	G	G	G	A	A	A	G	G	G	A	G	G	A	G	G	G	A	G	A	A	A	G
S1B_434683125	A/C	1B	434683125	+	A	A	A	A	A	A	A	A	A	A	A	A	A	A	A	M	A	A	C	A	A	A	C	C	C	A	A	A	A	A	A	A	A	A	A	A	A	A	A	A	A	A	A	A	A
S1B_435145847	A/G	1B	435145847	+	G	A	G	A	A	A	G	G	A	G	A	A	A	A	G	G	A	A	A	A	A	G	A	A	A	A	G	G	G	A	A	A	G	A	A	G	A	A	A	G	A	G	G	G	A
S1B_435767046	A/G	1B	435767046	+	G	A	G	A	A	A	G	G	A	G	A	A	A	A	G	G	A	A	A	A	A	G	A	A	A	A	G	G	G	A	A	A	G	A	A	G	A	A	A	G	A	G	G	G	A
S1B_435789809	A/G	1B	435789809	+	G	A	G	A	A	A	G	G	A	G	A	A	A	A	G	G	A	A	A	A	A	G	A	A	A	A	G	G	G	A	A	A	G	A	A	G	A	A	A	G	A	G	G	G	A
S1B_435846364	A/G	1B	435846364	+	G	A	G	A	A	A	G	G	A	G	A	A	A	A	G	G	A	A	A	A	A	G	A	A	A	A	G	G	G	A	A	A	G	A	A	G	A	A	A	G	A	G	G	G	A
S1B_436019105	C/T	1B	436019105	+	T	C	T	C	C	C	T	T	C	T	C	C	C	C	T	T	C	C	C	C	C	T	C	C	C	C	T	T	T	C	C	C	T	C	C	T	C	C	C	T	C	T	T	T	C
S1B_436754514	C/T	1B	436754514	+	T	C	T	C	C	C	T	T	C	T	C	C	C	C	T	T	C	C	C	C	C	T	C	C	C	C	T	T	T	C	C	C	T	C	C	T	C	C	C	T	C	T	T	T	C
S1B_436754535	T/C	1B	436754535	+	C	T	C	T	T	T	C	C	T	C	T	T	T	T	C	C	T	T	T	T	T	C	T	T	T	T	C	C	C	T	T	T	C	T	T	C	T	T	T	C	T	C	C	C	T
S1B_437317520	C/T	1B	437317520	+	T	C	T	C	C	C	T	T	C	T	C	C	C	C	T	T	C	C	C	C	C	T	C	C	C	C	T	T	T	C	C	C	T	C	Y	T	C	C	C	T	C	T	T	T	C
S1B_438187509	T/C	1B	438187509	+	C	T	C	T	T	T	C	C	T	C	T	T	T	T	C	C	T	T	T	T	T	C	T	T	T	T	Y	C	C	T	T	T	C	T	T	C	T	T	T	C	T	C	C	C	T
S1B_438300631	G/C	1B	438300631	+	C	G	C	G	G	G	C	C	G	C	G	G	G	G	C	C	G	G	G	G	G	C	G	G	G	G	C	C	C	G	G	G	C	G	G	C	G	G	G	C	G	C	C	C	G
S1B_438611051	C/T	1B	438611051	+	T	C	T	C	C	C	T	T	C	T	C	C	C	C	T	T	C	C	C	C	C	T	C	C	C	C	T	T	T	C	C	C	T	C	C	T	C	C	C	T	C	T	T	T	C
S1B_438953432	G/T	1B	438953432	+	T	G	T	G	G	G	T	T	G	T	G	G	G	G	T	K	G	G	G	G	G	K	G	G	G	G	T	T	T	G	G	G	T	G	G	T	G	G	G	T	G	T	T	T	G
S1B_438953438	G/C	1B	438953438	+	G	S	G	G	G	G	G	G	G	G	G	G	G	G	G	G	G	S	G	G	G	G	G	G	G	G	G	G	G	G	G	G	G	G	G	G	S	G	G	G	S	G	G	G	G
S1B_438961604	C/A	1B	438961604	+	A	C	A	C	C	C	A	A	C	A	C	C	C	C	A	A	C	C	C	C	C	A	C	C	C	C	A	A	A	C	C	C	A	C	C	A	C	C	C	A	C	A	A	A	C
S1B_439482450	C/T	1B	439482450	+	T	C	T	C	C	C	T	T	C	T	C	C	C	C	T	T	C	C	C	C	C	T	C	C	C	C	T	T	T	C	C	C	T	C	C	T	C	C	C	T	C	T	T	T	C
S1B_439482476	A/G	1B	439482476	+	G	A	G	A	A	A	G	G	A	G	A	A	A	A	G	G	A	A	A	A	A	G	A	A	A	A	G	G	G	A	A	A	G	A	A	G	A	A	A	G	A	G	G	G	A
S1B_439482491	C/T	1B	439482491	+	T	C	T	C	C	C	T	T	C	T	C	C	C	C	T	T	C	C	C	C	C	T	C	C	C	C	T	T	T	C	C	C	T	C	C	T	C	C	C	T	C	T	T	T	C
S1B_439492302	A/G	1B	439492302	+	G	A	G	A	A	A	G	G	A	G	A	A	A	A	G	G	A	A	A	A	A	G	A	A	A	A	G	G	G	A	A	A	G	A	A	G	A	A	A	G	A	G	G	G	A
S1B_439492335	A/C	1B	439492335	+	C	A	C	A	A	A	C	C	A	C	A	A	A	A	C	C	A	A	A	A	A	C	A	A	A	A	C	C	C	A	A	A	C	A	A	C	A	A	A	C	A	C	C	C	A
S1B_439845907	C/T	1B	439845907	+	T	C	T	C	C	C	T	T	C	T	C	C	C	C	T	T	C	C	C	C	C	T	C	C	C	C	T	T	T	C	C	C	T	C	C	T	C	C	C	T	C	T	T	T	C
S1B_439845912	A/G	1B	439845912	+	G	A	G	A	A	A	G	G	A	G	A	A	A	A	G	G	A	A	A	A	A	G	A	A	A	A	G	G	G	A	A	A	G	A	A	G	A	A	A	G	A	G	G	G	A
S1B_439845932	C/T	1B	439845932	+	T	C	T	C	C	C	T	T	C	T	C	C	C	C	T	T	C	C	C	C	C	T	C	C	C	C	T	T	T	C	C	C	T	C	C	T	C	C	C	T	C	T	T	T	C
S1B_439933525	C/T	1B	439933525	+	T	C	T	C	C	C	T	T	C	T	C	C	C	C	T	T	C	C	C	C	C	T	C	C	C	C	T	T	T	C	C	C	T	C	C	T	C	C	C	T	C	T	T	T	C
S1B_443861514	G/C	1B	443861514	+	C	G	C	G	G	G	C	C	G	C	G	G	G	G	C	C	G	G	G	G	G	C	G	G	G	G	C	C	C	G	G	G	C	G	G	C	G	G	G	C	G	C	C	C	G
S1B_443861565	T/G	1B	443861565	+	T	T	T	K	T	T	T	T	T	T	T	T	K	T	T	T	T	T	T	T	T	T	K	T	K	T	T	T	T	K	T	T	T	T	T	T	T	K	T	T	T	T	T	T	T
S1B_443995857	C/T	1B	443995857	+	C	C	C	C	C	C	C	C	C	C	C	C	C	C	C	C	C	C	C	Y	C	C	C	C	C	C	C	C	Y	C	Y	Y	C	C	C	C	C	C	C	C	C	C	C	C	C
S1B_443995875	C/G	1B	443995875	+	C	C	C	C	C	C	C	C	C	C	C	C	C	C	C	C	C	C	C	S	C	C	C	C	C	C	C	C	S	C	S	S	C	C	C	C	C	C	C	C	C	C	C	C	C
S1B_444514233	G/A	1B	444514233	+	A	G	A	A	G	G	A	A	G	A	G	G	G	G	A	A	G	G	G	G	G	A	G	G	G	G	A	A	A	G	G	G	A	G	G	A	G	G	G	A	G	A	A	A	G
S1B_445045502	T/G	1B	445045502	+	G	T	G	T	T	T	G	G	T	G	T	T	T	T	G	G	T	T	T	T	T	G	T	T	T	T	G	G	G	T	T	T	G	T	T	G	T	T	T	G	T	G	G	G	T
S1B_447976469	G/A	1B	447976469	+	G	G	G	G	A	G	G	G	G	G	G	G	G	G	G	G	G	G	A	G	G	G	A	A	A	G	G	G	G	G	G	G	G	G	G	G	G	G	G	G	G	G	G	G	G
S1B_448180068	C/T	1B	448180068	+	C	C	C	C	T	C	C	C	C	C	C	C	C	C	C	C	C	C	T	C	C	C	T	T	T	C	C	C	C	C	C	C	C	C	C	C	C	C	C	C	C	C	C	C	C
S1B_448946474	C/T	1B	448946474	+	C	C	C	C	T	C	C	C	C	C	C	C	C	C	C	C	C	C	T	C	C	C	T	T	T	C	C	C	T	C	C	C	T	C	C	C	C	C	C	C	C	C	C	C	C
S1B_448981459	G/T	1B	448981459	+	G	G	G	G	G	G	G	G	G	G	G	G	G	G	G	G	G	G	K	G	G	G	G	G	K	G	G	G	G	G	G	G	G	G	G	G	G	G	G	G	G	G	G	G	G
S1B_448981461	C/T	1B	448981461	+	C	C	C	C	C	C	C	C	C	C	C	C	C	C	C	C	C	C	Y	C	C	C	C	C	Y	C	C	C	C	C	C	C	C	C	C	C	C	C	C	C	C	C	C	C	C
S1B_453128750	C/A	1B	453128750	+	A	C	A	C	C	C	A	A	C	C	C	C	C	C	A	A	C	C	C	C	C	A	C	C	C	C	A	A	A	C	C	C	A	C	C	A	C	C	C	A	C	A	A	A	C
S1B_455340340	C/G	1B	455340340	+	C	C	C	C	C	C	C	C	C	C	C	C	C	S	C	C	C	S	C	C	C	C	C	C	C	C	S	C	C	C	S	S	C	C	C	C	C	C	S	C	C	C	C	C	C
S1B_455340344	C/G	1B	455340344	+	C	C	C	C	C	C	C	C	C	C	C	C	C	S	C	C	C	S	C	C	C	C	C	C	C	C	S	C	C	C	S	S	C	C	C	C	C	C	S	C	C	C	C	C	C
S1B_458209946	C/T	1B	458209946	+	C	C	C	C	C	C	C	C	C	C	C	C	C	C	C	C	C	T	C	C	C	C	C	C	C	C	Y	C	C	C	Y	C	C	C	C	Y	C	C	C	C	C	C	C	C	C
S1B_459197978	A/G	1B	459197978	+	G	A	G	A	A	A	G	G	A	A	A	A	A	A	G	G	A	A	A	A	A	G	A	A	A	A	A	A	A	A	A	A	G	A	A	A	A	A	A	G	A	G	G	A	A
S1B_460798216	G/T	1B	460798216	+	T	G	T	G	G	G	T	T	G	G	G	G	G	G	T	T	G	G	G	G	G	T	G	G	G	G	G	T	G	G	G	G	T	G	G	T	G	G	G	T	G	T	T	T	G
S1B_461204851	G/C	1B	461204851	+	G	G	G	G	G	G	G	G	G	G	G	G	S	G	G	G	G	G	G	G	G	G	G	G	G	G	G	G	G	G	G	G	G	G	G	G	G	G	G	G	G	G	G	G	S
S1B_461204863	A/G	1B	461204863	+	A	A	A	A	A	A	A	A	A	A	A	A	R	A	A	A	A	A	A	A	A	A	A	A	A	A	A	A	A	A	A	A	A	A	A	A	A	A	A	A	A	A	A	A	R
S1B_462151173	C/A	1B	462151173	+	C	C	C	C	C	C	C	C	C	C	C	C	C	C	C	C	C	C	C	C	C	C	C	C	C	C	A	C	C	C	A	A	C	C	C	M	C	C	M	C	C	C	C	C	C
S1B_462151196	T/A	1B	462151196	+	T	T	T	T	T	T	T	T	T	T	T	T	T	T	T	T	T	T	T	T	T	T	T	T	T	T	A	T	T	T	A	A	T	T	T	W	T	T	W	T	T	T	T	T	T
S1B_462640926	G/A	1B	462640926	+	A	G	A	G	G	G	A	A	G	G	G	G	G	G	A	A	G	G	G	G	G	A	G	G	G	G	G	A	G	G	G	G	A	G	G	A	G	G	G	A	G	A	A	A	G
S1B_462641693	A/G	1B	462641693	+	G	A	G	A	A	A	G	G	A	A	A	A	A	A	G	G	A	A	A	A	A	G	A	A	A	A	A	G	A	A	A	A	G	A	A	G	A	A	A	G	A	G	G	G	A
S1B_462785370	G/T	1B	462785370	+	G	K	G	G	G	G	G	G	G	G	G	G	G	G	G	G	G	G	G	G	G	G	G	K	G	K	G	G	G	G	G	G	G	G	G	G	G	G	G	G	G	G	G	G	G
S1B_463271123	G/A	1B	463271123	+	A	G	A	G	G	G	A	A	G	G	G	G	G	G	A	A	G	G	G	G	G	A	G	G	G	G	G	A	G	G	G	G	A	G	G	A	G	G	G	A	G	A	A	A	G
S1B_463429674	C/T	1B	463429674	+	T	C	T	Y	C	C	Y	T	C	C	C	C	C	C	T	T	C	C	C	C	C	T	C	C	C	C	C	T	C	C	C	C	T	C	C	T	C	C	C	T	C	T	T	T	C
S1B_464090502	A/T	1B	464090502	+	A	A	A	A	A	W	A	A	A	A	A	A	A	A	A	A	A	A	W	A	A	W	A	A	A	W	A	A	A	A	A	A	A	A	A	A	A	A	A	T	A	W	A	A	A
S1B_465899097	G/A	1B	465899097	+	G	R	G	G	G	R	G	G	G	G	G	G	G	G	G	G	G	G	G	G	G	G	A	R	G	G	G	R	G	G	G	G	G	G	G	G	G	G	G	G	G	G	G	G	G
S1B_466326861	G/A	1B	466326861	+	G	G	G	G	G	G	G	G	G	G	G	G	G	G	G	G	G	G	G	G	G	G	R	G	G	G	G	G	G	G	R	R	G	G	G	G	R	G	G	G	G	G	G	G	G
S1B_467311237	A/G	1B	467311237	+	A	A	A	A	A	A	A	A	A	A	A	A	A	A	A	R	A	A	A	A	A	A	A	R	A	A	A	A	A	A	A	A	A	A	R	A	A	A	A	A	R	A	A	A	A
S1B_467311261	T/G	1B	467311261	+	T	T	T	T	T	T	K	T	K	T	T	G	T	T	K	T	T	T	T	K	T	T	T	T	T	T	T	K	T	T	T	G	T	T	T	T	K	K	T	K	K	K	T	T	T
S1B_467311279	G/T	1B	467311279	+	G	G	T	G	G	G	G	G	G	G	K	G	G	G	K	K	K	G	G	G	G	G	G	G	G	G	G	K	K	G	G	G	G	G	G	G	G	G	G	G	G	G	G	G	G
S1B_467677754	C/A	1B	467677754	+	C	M	C	C	C	A	C	C	C	C	C	C	C	M	C	C	A	M	C	A	M	M	C	C	C	C	C	M	C	C	C	C	C	C	C	C	C	C	C	C	C	C	C	C	C
S1B_467677783	C/T	1B	467677783	+	C	C	C	C	Y	C	T	Y	Y	C	C	C	C	C	C	C	C	C	C	C	C	C	C	C	C	T	C	C	C	C	C	C	C	Y	C	C	C	C	C	C	Y	Y	C	C	Y
S1B_467677802	G/A	1B	467677802	+	A	G	A	G	R	G	G	R	R	A	A	G	A	G	G	A	G	G	A	G	G	R	A	A	A	G	A	R	A	A	G	G	A	G	A	A	G	A	G	A	G	R	A	A	G
S1B_467677807	C/A	1B	467677807	+	C	M	C	A	C	C	C	C	C	C	C	A	C	M	C	C	C	M	C	C	M	C	C	C	C	C	C	C	C	C	A	A	C	M	C	C	A	C	A	C	M	C	C	C	M
S1B_469040338	A/G	1B	469040338	+	A	A	A	A	A	A	A	A	A	A	R	A	A	A	A	A	A	A	G	A	A	A	A	A	A	A	A	R	A	R	A	A	A	A	R	A	A	R	A	A	A	A	R	A	A
S1B_470009107	T/G	1B	470009107	+	G	T	G	T	T	T	G	G	T	T	T	T	T	T	G	G	T	T	T	T	T	G	T	T	T	T	T	G	T	T	T	T	G	T	K	G	T	T	T	G	T	G	G	G	T
S1B_472810218	C/G	1B	472810218	+	C	C	C	C	C	C	C	C	C	C	C	C	C	C	C	C	C	S	C	C	C	C	C	C	C	C	S	C	C	C	S	S	C	C	C	S	C	C	S	C	C	C	C	C	C
S1B_472810231	C/T	1B	472810231	+	C	C	C	C	C	C	C	C	C	C	C	C	C	C	C	C	C	Y	C	C	C	C	C	C	C	C	Y	C	C	C	Y	Y	C	C	C	Y	C	C	Y	C	C	C	C	C	C
S1B_472810232	T/G	1B	472810232	+	T	T	T	T	T	T	T	T	T	T	T	T	T	T	T	T	T	K	T	T	T	T	T	T	T	T	K	T	T	T	K	K	T	T	T	K	T	T	K	T	T	T	T	T	T
S1B_477391619	G/A	1B	477391619	+	G	G	G	G	G	G	G	G	G	G	G	G	G	G	G	G	G	G	G	G	G	G	G	G	G	G	G	G	G	G	G	G	G	G	G	G	G	G	G	G	G	G	G	G	G
S1B_477398059	C/T	1B	477398059	+	C	C	C	C	C	C	C	C	C	C	C	C	C	C	C	C	C	C	C	C	C	C	C	C	C	C	C	C	C	C	C	C	C	C	C	C	C	C	C	C	C	C	C	C	C
S1B_480028601	A/G	1B	480028601	+	A	A	A	R	A	A	A	A	A	A	A	A	A	A	A	A	A	A	A	A	A	A	A	A	A	A	A	A	A	A	A	A	A	A	A	A	A	A	A	A	A	A	A	A	A
S1B_480323221	T/C	1B	480323221	+	T	T	T	T	T	T	T	T	T	T	T	T	T	T	T	T	T	T	T	T	T	T	T	T	T	T	T	T	T	T	T	T	T	T	T	T	T	T	T	T	T	T	T	T	T
S1B_480323243	T/A	1B	480323243	+	T	T	T	T	T	T	T	T	T	T	T	T	T	T	T	T	T	T	T	T	T	T	T	T	T	T	T	T	T	T	T	T	T	T	T	T	T	T	T	T	T	T	T	T	T
S1B_482761004	A/G	1B	482761004	+	A	R	A	A	A	A	A	A	A	A	A	R	R	R	R	R	R	R	A	G	R	A	A	A	A	A	A	A	A	A	A	A	A	A	A	A	A	A	A	A	A	A	A	A	A
S1B_482761005	A/G	1B	482761005	+	A	R	A	A	R	A	A	A	A	A	A	R	R	R	G	R	R	R	A	G	R	A	A	A	A	R	A	A	A	A	A	A	A	A	A	A	A	A	A	A	A	A	A	A	A
S1B_483590851	C/A	1B	483590851	+	C	C	C	C	C	C	C	C	C	C	C	C	C	C	C	C	C	C	C	C	C	C	C	C	C	C	C	C	C	C	C	C	C	C	C	C	C	C	C	C	C	C	C	C	C
S1B_490720237	G/C	1B	490720237	+	G	G	S	G	G	G	S	G	G	G	G	G	G	G	G	G	S	G	G	G	G	G	G	G	G	G	G	G	G	G	G	G	G	G	G	G	G	G	C	G	G	G	G	S	G
S1B_490882186	G/A	1B	490882186	+	G	G	G	R	G	G	G	G	R	G	G	G	G	G	G	G	G	G	G	G	G	G	G	R	G	R	G	G	G	R	A	G	G	G	G	R	G	G	G	G	G	G	G	G	G
S1B_492494873	A/G	1B	492494873	+	A	A	A	A	A	A	A	A	A	A	A	A	A	A	A	A	A	R	A	A	A	A	A	A	A	A	R	A	A	A	R	R	A	A	A	A	A	A	G	A	A	A	R	A	A
S1B_493554404	A/G	1B	493554404	+	A	A	A	A	A	A	A	A	A	A	A	A	A	A	A	A	A	A	A	A	A	A	A	A	A	A	A	A	A	A	A	A	A	A	A	A	A	A	A	A	A	A	A	A	A
S1B_493554439	C/T	1B	493554439	+	C	C	C	C	C	C	C	C	C	C	C	C	C	C	C	C	C	C	C	C	C	C	C	C	C	C	C	C	C	C	C	C	C	C	C	C	C	C	C	C	C	C	C	C	C
S1B_496028906	G/A	1B	496028906	+	G	G	G	G	G	G	G	A	G	G	G	G	G	G	G	G	G	G	G	G	G	G	G	G	G	G	G	G	G	G	G	G	G	G	G	G	G	G	G	G	G	G	G	G	G
S1B_496029014	T/A	1B	496029014	+	T	T	T	T	T	T	T	T	T	T	T	T	T	T	T	T	T	T	T	T	T	T	T	T	T	T	T	T	T	T	T	T	T	T	T	T	T	T	T	T	T	T	T	T	T
S1B_496539546	G/C	1B	496539546	+	G	S	G	G	G	S	G	G	G	G	G	G	G	G	S	G	G	G	G	G	G	G	S	G	G	G	G	G	G	G	G	G	G	G	G	G	G	G	G	G	S	G	G	G	G
S1B_497204330	C/G	1B	497204330	+	C	C	C	C	C	C	S	C	C	C	C	C	C	C	C	C	S	S	C	C	C	C	S	S	C	C	C	C	C	C	C	C	C	C	C	C	C	C	C	C	C	S	C	C	C
S1B_497823431	G/A	1B	497823431	+	G	G	G	G	G	G	G	G	G	G	G	G	G	G	R	R	G	G	G	G	G	G	G	G	G	G	G	G	G	G	G	G	G	G	G	G	G	G	G	G	G	G	G	R	G
S1B_497823442	T/C	1B	497823442	+	T	T	T	T	T	T	T	T	T	T	T	T	T	T	Y	Y	T	T	T	T	T	T	T	T	T	T	T	T	T	T	T	T	T	T	T	T	T	T	T	T	T	T	T	Y	T
S1B_498453142	G/C	1B	498453142	+	G	G	G	G	G	G	G	G	G	G	G	G	G	G	G	G	G	S	G	G	G	G	G	G	G	G	S	G	G	G	S	S	G	G	G	S	G	G	S	G	G	G	G	G	G
S1B_498453161	T/C	1B	498453161	+	T	T	T	T	T	T	T	T	T	T	T	T	T	T	T	T	T	Y	T	T	T	T	T	T	T	T	Y	T	T	T	Y	Y	T	T	T	Y	T	T	Y	T	T	T	T	T	T
S1B_498453164	A/T	1B	498453164	+	A	A	A	A	A	A	A	A	A	A	A	A	A	A	A	A	A	W	A	A	A	A	A	A	A	A	W	A	A	A	W	W	A	A	A	W	A	A	W	A	A	A	A	A	A
S1B_503369523	C/T	1B	503369523	+	C	C	C	Y	C	C	C	C	C	C	C	C	Y	T	C	C	C	C	C	Y	Y	C	T	C	Y	C	Y	C	C	C	C	C	C	C	C	C	C	C	C	Y	C	Y	C	C	C
S1B_504911072	G/C	1B	504911072	+	G	G	G	S	G	G	G	G	G	G	S	G	G	G	G	G	G	G	G	G	G	G	G	G	S	G	G	G	G	S	G	G	G	G	S	G	G	G	G	G	G	G	G	G	G
S1B_504911079	G/C	1B	504911079	+	G	G	G	G	G	G	S	G	G	G	G	G	G	G	S	S	G	G	S	G	G	S	G	G	G	G	G	S	G	S	G	G	G	G	G	G	G	G	G	G	G	G	G	S	G
S1B_504911095	C/G	1B	504911095	+	C	C	C	C	C	C	S	C	C	C	C	C	C	C	C	C	C	C	C	C	C	S	C	C	C	C	C	S	C	C	C	C	C	C	C	C	C	C	C	C	C	C	C	C	C
S1B_504911101	C/T	1B	504911101	+	C	C	C	C	C	Y	C	C	C	C	C	C	T	Y	C	C	C	C	C	C	C	C	C	C	C	C	C	C	C	C	C	C	C	Y	C	C	C	C	C	C	C	C	C	C	C
S1B_504911119	A/T	1B	504911119	+	A	A	A	A	A	A	W	A	A	A	A	A	A	A	A	A	A	A	A	A	A	W	A	A	A	A	A	W	A	A	A	A	A	A	A	A	A	A	A	A	A	A	A	A	A
S1B_504947122	G/C	1B	504947122	+	G	G	G	G	G	G	G	G	G	G	G	G	G	G	G	G	G	S	G	G	G	G	G	G	G	G	S	G	G	G	G	S	G	G	G	S	G	G	S	G	G	G	G	G	G
S1B_506828548	G/C	1B	506828548	+	G	G	G	G	G	G	G	G	G	G	G	G	G	G	G	G	G	G	G	G	G	G	G	G	G	G	G	G	G	G	G	G	G	G	G	G	G	G	G	G	G	G	G	G	G
S1B_508013026	A/G	1B	508013026	+	A	A	A	A	A	A	A	A	A	A	A	A	A	A	A	A	A	A	A	A	A	A	A	A	A	A	A	A	A	A	A	A	A	A	A	A	A	A	A	A	A	A	A	A	A
S1B_508861555	T/C	1B	508861555	+	T	T	T	T	C	T	T	T	T	T	T	T	Y	C	T	T	T	T	T	T	T	Y	T	Y	T	T	T	T	Y	T	T	Y	T	T	T	Y	Y	T	T	T	Y	T	T	T	T
S1B_508861561	T/C	1B	508861561	+	T	T	T	T	C	T	T	T	T	T	T	T	Y	C	T	T	T	T	T	T	T	Y	T	Y	T	T	T	T	Y	T	T	Y	T	T	T	Y	Y	T	T	T	Y	T	T	T	T
S1B_508861582	T/G	1B	508861582	+	T	T	T	T	G	T	T	T	T	T	T	T	K	G	T	T	T	T	T	T	T	K	T	K	T	T	T	T	K	T	T	K	T	T	T	K	K	T	T	T	K	T	T	T	T
S1B_509716768	C/G	1B	509716768	+	S	C	C	S	C	C	C	C	C	S	C	C	G	C	S	S	C	C	C	C	C	C	C	C	C	C	C	C	C	C	C	C	S	C	C	S	C	C	C	S	C	G	C	G	C
S1B_509716778	G/T	1B	509716778	+	K	G	G	G	G	G	G	G	G	K	G	G	K	G	K	G	G	G	G	G	G	G	G	G	G	G	G	G	G	G	G	G	K	G	G	K	G	G	G	K	G	K	G	G	G
S1B_510555823	C/A	1B	510555823	+	C	C	C	C	C	C	C	C	C	C	C	C	C	C	C	C	C	C	C	C	C	C	C	C	C	C	C	C	C	C	C	C	C	C	C	C	C	C	C	C	C	C	C	C	C
S1B_511914759	C/T	1B	511914759	+	C	C	C	Y	C	C	C	C	C	C	C	C	C	C	C	C	C	C	Y	C	C	C	C	C	C	C	C	C	C	C	C	C	C	C	C	C	C	C	C	C	C	C	C	Y	C
S1B_513123168	C/G	1B	513123168	+	C	C	C	C	G	C	C	C	C	C	C	C	C	C	S	S	C	C	C	C	C	C	C	C	C	C	S	G	C	C	C	C	C	C	C	C	C	C	C	C	C	C	C	C	C
S1B_513123196	G/A	1B	513123196	+	G	G	G	G	A	G	G	G	G	G	G	G	G	G	R	R	G	G	G	G	G	G	G	G	G	G	R	A	G	G	G	G	G	G	G	G	G	G	G	G	G	G	G	G	G
S1B_516997603	C/G	1B	516997603	+	C	C	C	C	C	C	C	C	C	C	C	C	C	C	C	C	C	C	C	C	C	C	G	G	G	C	C	C	C	C	C	C	C	C	C	C	C	C	C	C	C	C	C	C	C
S1B_518645019	T/C	1B	518645019	+	T	T	T	T	T	T	T	T	T	T	T	T	T	T	T	T	T	T	T	T	T	T	T	T	T	T	Y	T	T	T	Y	T	T	T	T	Y	T	T	Y	T	T	T	T	T	T
S1B_518664825	C/T	1B	518664825	+	C	C	C	C	C	C	T	Y	C	C	Y	C	Y	C	C	C	Y	C	C	C	C	C	C	C	C	T	C	C	C	C	C	C	Y	C	T	C	Y	T	C	C	C	C	C	C	C
S1B_518815911	A/G	1B	518815911	+	A	A	A	A	A	A	A	A	A	A	A	A	A	A	A	A	A	A	A	A	A	A	A	A	A	A	A	A	A	A	A	A	A	A	A	A	A	A	A	A	A	A	A	A	A
S1B_519503764	T/C	1B	519503764	+	T	T	T	T	T	T	T	T	T	T	T	T	T	T	T	T	T	T	T	T	T	T	T	T	T	T	T	T	T	T	T	T	T	T	T	T	T	T	T	T	T	T	T	T	T
S1B_519503771	A/T	1B	519503771	+	A	A	A	A	A	A	A	A	A	A	A	A	A	A	A	A	A	A	A	A	A	A	A	A	A	A	A	A	A	A	A	A	A	A	A	A	A	A	A	A	A	A	A	A	A
S1B_519503772	G/T	1B	519503772	+	G	G	G	G	G	G	G	G	G	G	G	G	G	G	G	G	G	G	G	G	G	G	G	G	G	G	G	G	G	G	G	G	G	G	G	G	G	G	G	G	G	G	G	G	G
S1B_520521221	G/A	1B	520521221	+	G	G	G	G	G	G	G	G	R	R	G	G	G	G	G	R	G	G	G	A	G	R	G	G	A	G	G	A	G	A	G	G	A	G	G	G	G	G	G	G	R	R	A	G	G
S1B_520521222	C/T	1B	520521222	+	C	C	C	C	C	C	C	C	Y	Y	C	C	C	C	C	Y	C	C	C	T	C	Y	C	C	T	C	C	T	C	T	C	C	T	C	C	C	C	C	C	C	Y	Y	T	C	C
S1B_520591461	G/C	1B	520591461	+	G	G	G	G	G	G	G	G	G	G	G	G	G	G	G	G	G	G	G	G	G	G	C	C	C	G	G	G	G	G	G	G	G	G	G	G	G	G	G	G	G	G	G	G	G
S1B_520591505	G/A	1B	520591505	+	G	G	G	G	G	G	G	G	G	G	G	G	G	G	G	G	G	G	G	G	G	G	A	A	A	G	G	G	G	G	G	G	G	G	G	G	G	G	G	G	G	G	G	G	G
S1B_520591520	C/T	1B	520591520	+	C	C	C	C	C	C	C	C	C	C	C	C	C	C	C	C	C	C	C	C	C	C	C	C	C	C	C	C	C	C	C	C	C	C	C	C	C	C	C	C	C	C	C	C	C
S1B_520591661	A/G	1B	520591661	+	A	A	A	A	A	A	A	A	A	A	A	A	A	A	A	A	A	A	A	A	A	A	A	A	A	A	A	A	A	A	A	A	A	A	A	A	A	A	A	A	A	A	A	A	A
S1B_520595134	T/C	1B	520595134	+	T	T	T	T	T	T	T	T	T	T	T	T	T	T	T	T	T	T	T	T	T	T	T	T	T	T	T	T	T	T	T	T	T	T	T	T	T	T	T	T	T	T	T	T	T
S1B_520595612	T/C	1B	520595612	+	T	T	T	T	T	T	T	T	T	T	T	T	T	T	T	T	T	T	T	T	T	T	C	C	C	T	T	T	T	T	T	T	T	T	T	T	T	T	T	T	T	T	T	T	T
S1B_520595618	G/A	1B	520595618	+	G	G	G	G	G	G	G	G	G	G	G	G	G	G	G	G	G	G	G	G	G	G	A	A	A	G	G	G	G	G	G	G	G	G	G	G	G	G	G	G	G	G	G	G	G
S1B_520595638	C/T	1B	520595638	+	C	C	C	C	C	C	C	C	C	C	C	C	C	C	C	C	C	C	C	C	C	C	T	T	T	C	C	C	C	C	C	C	C	C	C	C	C	C	C	C	C	C	C	C	C
S1B_523356696	A/T	1B	523356696	+	A	A	A	A	A	A	A	A	A	A	A	A	W	A	A	A	A	A	A	A	A	A	T	T	T	A	A	A	A	A	A	A	A	A	A	A	A	A	A	A	A	A	A	A	A
S1B_523356971	G/A	1B	523356971	+	G	G	G	G	G	G	G	G	G	G	G	G	G	G	G	G	G	G	G	G	G	G	A	A	A	G	G	G	G	G	G	G	G	G	G	G	G	G	G	G	G	G	G	G	G
S1B_524187744	C/T	1B	524187744	+	C	C	C	C	C	C	C	C	C	C	C	C	C	C	C	C	C	C	C	C	C	C	T	T	T	C	C	C	C	C	C	C	C	C	C	C	C	C	C	C	C	C	C	C	C
S1B_524252865	A/T	1B	524252865	+	A	W	A	A	A	A	A	A	A	A	A	A	A	A	A	A	A	A	A	W	A	A	A	A	A	A	A	A	A	A	A	A	A	A	A	A	A	A	A	W	A	A	A	A	A
S1B_524539958	G/A	1B	524539958	+	G	G	G	G	G	G	G	G	G	G	G	G	G	G	G	G	G	G	G	G	G	G	A	A	A	G	G	G	G	G	G	G	G	G	G	G	G	G	G	G	G	G	G	G	G
S1B_525382958	T/A	1B	525382958	+	W	T	T	T	T	T	T	T	T	T	T	T	T	T	T	T	T	T	T	T	T	T	W	W	W	T	T	T	T	W	T	T	W	T	W	W	T	T	T	W	T	W	W	T	T
S1B_525383055	A/G	1B	525383055	+	R	A	A	A	A	A	A	A	A	A	R	A	A	A	A	A	A	A	A	A	A	A	R	R	R	A	A	A	A	G	A	A	A	A	R	R	A	R	A	R	A	R	R	A	A
S1B_525383068	G/A	1B	525383068	+	R	G	G	G	G	G	G	G	G	G	R	G	G	G	G	G	G	G	G	G	G	G	R	R	R	G	G	G	G	A	G	G	G	G	R	R	G	R	G	R	G	R	R	G	G
S1B_526788657	C/T	1B	526788657	+	C	Y	C	C	C	C	T	C	T	C	C	Y	C	C	C	C	C	C	Y	C	C	C	C	C	C	C	C	C	C	C	C	C	C	C	C	C	C	C	Y	C	T	C	C	C	C
S1B_526788663	C/T	1B	526788663	+	Y	Y	C	C	C	Y	C	C	C	C	C	C	C	C	T	Y	C	C	C	C	C	C	C	C	C	C	C	C	C	C	C	C	C	C	C	Y	C	C	C	C	C	Y	C	C	C
S1B_526901265	C/T	1B	526901265	+	C	C	C	C	T	C	C	C	T	C	T	C	C	C	C	C	C	C	T	C	C	C	T	T	T	C	C	C	C	T	C	C	C	C	T	C	C	T	C	C	C	C	C	C	C
S1B_527187202	T/A	1B	527187202	+	T	T	T	T	T	T	T	T	A	T	A	T	T	T	T	T	T	T	A	T	T	T	A	A	A	T	T	T	T	A	T	T	T	T	A	T	T	A	T	T	T	T	T	T	T
S1B_527507681	G/C	1B	527507681	+	G	G	G	G	G	G	G	G	G	G	G	G	S	G	G	G	S	G	G	G	G	G	G	G	G	G	G	G	C	G	G	G	G	G	G	G	G	G	G	G	G	G	G	G	G
S1B_527507726	T/A	1B	527507726	+	T	T	T	T	A	T	T	T	A	T	A	T	T	T	T	T	T	T	A	T	T	T	A	A	A	T	T	T	T	A	T	T	T	T	A	T	T	A	T	T	T	T	T	T	T
S1B_527874014	T/C	1B	527874014	+	T	T	T	T	T	T	T	T	T	T	T	T	T	T	T	T	T	T	T	T	Y	T	Y	T	Y	T	T	T	T	T	T	T	T	T	Y	T	T	T	T	T	T	T	T	T	T
S1B_527874036	A/T	1B	527874036	+	A	A	A	W	A	A	A	A	A	A	A	W	A	A	A	A	A	A	A	A	A	A	A	A	A	W	A	A	A	T	A	A	A	A	A	A	A	W	A	W	A	A	A	A	A
S1B_531002241	C/T	1B	531002241	+	C	C	C	C	C	Y	C	C	Y	C	C	Y	C	C	C	C	Y	C	C	C	C	C	C	C	C	Y	C	C	C	C	Y	C	C	C	Y	C	Y	C	C	C	Y	C	C	C	C
S1B_532478284	C/A	1B	532478284	+	C	C	C	C	C	C	C	C	C	C	C	M	A	M	C	C	C	C	C	C	C	C	A	C	C	C	A	C	C	C	A	A	C	C	M	A	C	M	M	C	C	C	C	C	C
S1B_532478299	G/A	1B	532478299	+	G	G	G	G	G	G	G	G	G	G	G	R	A	R	G	G	G	G	G	G	G	G	A	G	G	G	A	G	G	G	A	A	G	G	R	A	G	R	R	G	G	G	G	G	G
S1B_533003915	G/C	1B	533003915	+	G	S	G	G	G	G	S	G	G	S	G	G	G	G	G	G	G	S	G	G	G	G	S	G	G	G	G	G	S	S	G	G	G	G	S	G	S	G	G	G	G	G	G	G	G
S1B_533004306	G/A	1B	533004306	+	G	G	G	G	G	G	G	G	G	G	G	R	G	G	G	G	G	G	G	G	G	G	A	G	G	G	G	G	G	G	G	G	R	G	R	G	G	R	G	G	G	G	G	G	G
S1B_533884094	T/C	1B	533884094	+	Y	T	T	T	T	C	T	T	T	T	T	T	T	T	T	T	T	T	T	T	T	T	T	T	T	T	Y	T	T	T	T	T	T	T	T	T	T	Y	T	T	T	T	T	T	T
S1B_534987684	G/C	1B	534987684	+	S	G	G	S	G	G	G	G	S	G	G	G	G	G	S	G	G	G	G	G	G	S	G	G	G	G	S	G	G	S	G	G	G	G	G	G	G	S	G	G	G	G	G	G	G
S1B_535921497	A/G	1B	535921497	+	A	A	A	A	A	A	A	A	A	G	A	A	A	G	A	A	A	A	A	A	R	A	A	A	A	A	A	A	A	A	A	A	R	A	R	A	A	R	A	A	A	A	R	A	A
S1B_536065020	T/A	1B	536065020	+	T	T	T	T	T	T	T	T	T	T	T	T	T	T	T	T	T	T	T	T	T	W	T	T	T	T	T	T	T	T	T	W	T	T	T	T	T	T	T	T	T	W	T	T	T
S1B_536259577	C/T	1B	536259577	+	C	C	C	T	C	C	C	C	C	Y	C	C	C	C	T	T	C	C	C	C	C	T	T	T	T	C	C	T	C	C	C	C	C	C	C	C	C	C	C	C	C	C	C	C	C
S1B_536259819	T/C	1B	536259819	+	T	T	T	C	T	T	T	T	T	T	T	T	T	T	C	C	T	T	T	T	T	C	C	C	C	T	T	C	T	T	T	T	T	T	T	T	T	T	T	T	T	T	T	T	T
S1B_536259821	T/G	1B	536259821	+	T	T	T	G	T	T	T	T	T	T	T	T	T	T	G	G	T	T	T	T	T	G	G	G	G	T	T	G	T	T	T	T	T	T	T	T	T	T	T	T	T	T	T	T	T
S1B_536259883	C/T	1B	536259883	+	C	C	T	C	T	C	T	T	T	T	T	C	T	C	C	C	C	C	T	C	C	C	C	C	C	C	T	C	T	T	C	C	C	C	T	C	C	T	C	C	C	C	C	C	C
S1B_536485484	T/C	1B	536485484	+	T	T	C	T	C	T	C	C	C	C	C	T	C	T	T	T	T	T	C	T	T	T	T	T	T	T	C	T	C	C	T	T	T	T	C	T	T	C	T	T	T	T	T	T	T
S1B_536485513	T/C	1B	536485513	+	C	C	T	T	T	C	T	T	T	T	T	C	T	C	T	T	C	C	T	C	C	T	T	T	T	C	T	T	T	T	C	C	C	C	T	C	C	T	C	C	C	C	C	C	C
S1B_536625913	T/C	1B	536625913	+	C	C	T	T	T	C	T	T	T	T	T	C	T	C	T	T	C	C	T	C	C	T	T	T	T	C	T	T	T	T	C	C	C	C	T	C	C	T	C	C	C	C	C	C	C
S1B_536625941	C/G	1B	536625941	+	C	C	C	G	C	C	C	C	C	C	C	C	C	C	G	G	C	C	C	C	C	G	G	G	G	C	C	G	C	C	C	C	C	C	C	C	C	C	C	C	C	C	C	C	C
S1B_537402123	G/T	1B	537402123	+	T	G	K	G	K	G	K	K	T	T	T	G	T	G	G	G	G	G	G	G	G	G	G	G	G	G	G	G	G	T	G	G	G	G	G	G	G	K	G	G	G	G	G	G	G
S1B_537403715	A/G	1B	537403715	+	A	A	A	G	G	A	A	A	A	A	A	A	A	A	G	G	A	A	G	A	A	G	G	G	G	A	A	G	A	A	A	A	A	A	A	A	A	A	A	A	A	A	A	A	A
S1B_537580535	G/A	1B	537580535	+	G	G	A	A	A	G	A	A	A	A	A	G	A	G	A	A	G	G	A	G	G	A	A	A	A	G	G	A	G	A	G	G	G	G	A	G	G	A	G	G	G	G	G	G	G
S1B_537828242	T/C	1B	537828242	+	Y	T	C	C	C	T	C	C	C	C	C	T	C	T	C	C	T	T	C	T	T	C	C	C	C	T	T	C	T	C	T	T	T	T	C	T	T	C	T	T	T	T	T	T	T
S1B_537828295	A/T	1B	537828295	+	A	W	A	T	A	W	A	A	A	A	A	A	W	A	A	A	A	A	A	A	A	A	A	A	A	A	A	A	W	W	W	A	A	W	A	A	A	A	A	A	T	A	A	A	A
S1B_537835445	A/G	1B	537835445	+	A	A	G	G	G	A	G	G	G	G	G	A	G	A	G	G	A	A	G	A	A	G	G	G	G	A	A	G	A	G	A	A	A	A	G	A	A	G	A	A	A	A	A	A	A
S1B_538156542	A/G	1B	538156542	+	A	A	A	A	A	R	A	A	A	A	A	A	G	A	A	A	A	A	A	A	A	A	A	A	A	A	A	A	A	A	A	A	R	A	R	A	A	R	A	A	A	A	A	A	A
S1B_538252336	T/A	1B	538252336	+	T	T	A	A	A	T	A	A	A	A	A	T	A	T	A	A	T	T	A	T	T	A	A	A	A	T	T	A	T	A	T	T	T	T	A	T	T	A	T	T	T	T	T	T	T
S1B_538306978	C/T	1B	538306978	+	C	Y	C	T	C	C	C	C	C	C	C	C	C	C	C	C	Y	C	C	C	Y	C	C	Y	Y	C	C	C	Y	C	C	T	C	Y	C	C	Y	C	T	C	C	C	C	C	T
S1B_538343476	A/T	1B	538343476	+	A	A	T	T	T	A	T	T	T	T	T	A	T	A	T	T	A	A	T	A	A	T	T	T	T	A	A	T	A	T	A	A	A	A	T	A	A	T	A	A	A	A	A	A	A
S1B_538849410	T/C	1B	538849410	+	T	T	C	C	C	T	C	C	C	C	C	T	C	T	C	C	T	T	C	T	T	C	C	C	C	T	T	C	T	C	T	T	T	T	C	T	T	C	T	T	T	T	T	T	T
S1B_540006655	C/G	1B	540006655	+	C	C	C	G	G	C	C	C	C	C	C	C	C	C	G	G	C	C	G	C	C	G	G	G	G	C	C	G	C	C	C	C	C	C	C	C	C	C	C	C	C	C	C	C	C
S1B_540366698	C/T	1B	540366698	+	C	C	C	T	T	C	C	C	C	C	C	C	C	C	T	T	C	C	T	C	C	T	T	T	T	C	C	T	C	C	C	C	C	C	C	C	C	C	C	C	C	C	C	C	C
S1B_541269723	T/C	1B	541269723	+	T	T	T	T	T	T	T	T	T	T	T	T	T	T	T	T	T	T	T	T	T	T	T	T	T	T	Y	T	T	T	Y	Y	T	T	T	T	T	T	Y	T	T	T	T	T	T
S1B_543259541	G/A	1B	543259541	+	G	G	G	A	A	G	G	G	G	G	G	G	G	G	A	A	G	G	A	G	G	A	A	A	A	G	G	A	G	G	G	G	G	G	G	G	G	G	G	G	G	G	G	G	G
S1B_543259842	A/T	1B	543259842	+	W	A	A	A	A	A	A	A	W	A	A	A	A	W	A	A	A	A	A	A	A	A	A	W	A	A	A	A	W	A	A	A	A	W	A	A	A	A	A	A	A	A	A	A	A
S1B_543363272	T/C	1B	543363272	+	T	T	T	C	C	T	T	T	T	T	T	T	T	T	C	C	T	T	C	T	T	C	C	C	C	T	T	C	T	T	T	T	T	T	T	T	T	T	T	T	T	T	T	T	T
S1B_543915876	G/T	1B	543915876	+	G	G	G	G	G	G	G	G	G	G	G	G	G	G	G	G	G	K	G	G	G	G	G	G	G	G	G	G	G	G	K	K	G	G	G	G	K	G	K	G	G	G	G	G	G
S1B_543946523	C/A	1B	543946523	+	C	C	C	C	M	M	C	C	C	C	C	C	C	C	C	C	C	C	C	C	M	C	C	M	C	C	C	C	C	C	C	C	C	C	C	C	C	M	C	C	C	C	C	C	C
S1B_543946537	C/A	1B	543946537	+	C	C	C	C	M	M	C	C	C	C	C	C	C	C	C	C	C	C	C	C	M	C	C	M	C	C	C	C	C	C	C	C	C	C	C	C	C	M	C	C	C	C	C	C	C
S1B_544051446	T/C	1B	544051446	+	T	T	T	C	C	T	T	T	T	T	T	T	T	T	C	C	T	T	C	T	T	C	C	C	C	T	T	C	T	T	T	T	T	T	T	T	T	T	T	T	T	T	T	T	T
S1B_544268311	G/A	1B	544268311	+	G	G	G	A	A	G	G	G	G	G	G	G	G	G	A	A	G	G	A	G	G	A	A	A	A	G	G	A	G	G	G	G	G	G	G	G	G	G	G	G	G	G	G	G	G
S1B_544268316	T/C	1B	544268316	+	T	T	T	C	C	T	T	T	T	T	T	T	T	T	C	C	T	T	C	T	T	C	C	C	C	T	T	C	T	T	T	T	T	T	T	T	T	T	T	T	T	T	T	T	T
S1B_544268337	A/G	1B	544268337	+	A	A	G	G	G	A	G	G	A	G	A	A	G	A	G	G	A	A	G	A	A	G	G	G	G	A	A	G	A	A	A	A	A	A	A	A	A	A	A	A	A	A	A	A	A
S1B_544560437	G/A	1B	544560437	+	G	G	G	R	G	G	G	A	G	G	G	G	G	G	G	G	G	G	G	G	G	G	G	R	R	G	G	G	G	G	G	R	G	G	G	G	G	G	R	G	G	G	G	G	G
S1B_546053056	C/G	1B	546053056	+	C	C	C	G	G	C	C	C	C	C	C	C	C	C	G	G	C	C	G	C	C	G	G	G	G	C	C	G	C	C	C	C	C	C	C	C	C	C	C	C	C	C	C	C	C
S1B_546064839	C/A	1B	546064839	+	C	C	C	A	A	C	C	C	C	C	C	C	C	C	A	A	C	C	A	C	C	A	A	A	A	C	C	A	C	C	C	C	C	C	C	C	C	C	C	C	C	C	C	C	C
S1B_546765145	A/T	1B	546765145	+	A	A	A	A	A	A	A	A	A	A	A	A	A	A	A	A	A	A	A	A	A	A	A	A	A	A	A	A	A	A	A	A	A	A	A	A	A	A	A	A	A	A	A	A	A
S1B_546931608	C/G	1B	546931608	+	C	C	C	C	C	C	C	C	C	C	C	C	C	C	C	C	C	S	C	C	C	C	C	C	C	C	G	C	C	C	S	S	C	C	C	G	C	C	S	C	C	C	C	C	C
S1B_546931615	A/G	1B	546931615	+	A	A	A	A	A	A	A	A	A	A	A	A	A	A	A	A	A	R	A	A	A	A	A	A	A	A	G	A	A	A	R	R	A	A	A	G	A	A	R	A	A	A	A	A	A
S1B_546931651	T/C	1B	546931651	+	T	T	T	T	T	T	T	T	T	T	T	T	T	T	T	T	T	Y	T	T	T	T	T	T	T	T	C	T	T	T	Y	Y	T	T	T	C	T	T	Y	T	T	T	T	T	T
S1B_547844849	C/T	1B	547844849	+	C	C	C	C	C	C	C	C	C	C	C	C	C	T	C	C	C	C	C	C	Y	C	C	C	C	T	C	C	T	C	C	C	C	Y	C	Y	C	C	C	C	C	C	C	T	C
S1B_547844851	G/T	1B	547844851	+	G	G	G	G	G	G	G	G	G	G	G	G	G	G	G	G	G	G	G	G	G	G	G	G	G	G	G	T	G	G	G	T	G	K	G	G	T	G	G	G	G	G	G	G	G
S1B_547844871	C/T	1B	547844871	+	C	C	C	C	C	C	C	C	C	C	C	C	C	C	C	C	C	C	C	C	C	C	C	C	C	C	C	T	C	C	C	T	C	Y	C	C	T	C	C	C	C	C	C	C	C
S1B_547844874	A/C	1B	547844874	+	A	A	A	A	A	A	A	A	A	A	A	A	A	A	A	A	A	A	A	A	A	A	A	A	A	A	A	C	A	A	A	C	A	M	A	A	C	A	A	A	A	A	A	A	A
S1B_547844881	G/T	1B	547844881	+	G	G	G	G	G	G	G	G	G	G	G	G	G	G	G	G	G	G	G	G	G	G	G	G	G	G	G	T	G	G	G	T	G	K	G	G	T	G	G	G	G	G	G	G	G
S1B_549256221	A/T	1B	549256221	+	A	A	T	T	T	A	T	T	A	T	A	A	T	A	T	T	A	A	T	A	A	T	T	T	T	A	A	T	A	A	A	A	A	A	A	A	A	A	A	A	A	A	A	A	A
S1B_549639502	T/C	1B	549639502	+	T	T	C	C	C	T	C	C	T	C	T	T	C	T	C	C	T	T	C	T	T	C	C	C	C	T	T	C	T	T	T	T	T	T	T	T	T	T	T	T	T	T	C	T	T
S1B_549709667	C/T	1B	549709667	+	C	C	T	T	T	C	T	C	C	C	C	C	C	C	T	T	C	C	T	C	C	T	T	T	T	C	C	T	C	C	C	C	C	C	C	C	C	C	C	C	C	C	C	C	C
S1B_550101625	A/G	1B	550101625	+	G	A	G	G	G	A	G	G	A	G	A	A	G	A	G	G	A	A	G	A	A	G	G	G	G	A	A	G	A	A	A	A	G	A	A	G	A	A	A	G	A	G	G	G	A
S1B_550113374	A/G	1B	550113374	+	G	A	G	G	G	A	G	G	A	G	A	A	G	A	G	G	A	A	G	A	A	G	G	G	G	A	A	G	A	A	A	A	G	A	A	G	A	A	A	G	A	G	G	G	A
S1B_550464509	G/C	1B	550464509	+	G	G	S	G	G	G	S	S	G	C	G	G	G	S	G	G	G	G	G	G	G	G	S	S	S	G	G	G	G	G	G	G	G	G	G	G	G	G	G	G	G	G	G	G	G
S1B_550748713	G/A	1B	550748713	+	A	G	A	A	A	G	A	A	G	A	G	G	A	G	A	A	G	G	A	G	G	A	A	A	A	G	G	A	G	G	G	G	A	G	G	A	G	G	G	A	G	A	A	A	G
S1B_551901432	C/A	1B	551901432	+	C	C	C	C	C	C	C	C	C	C	C	C	C	C	C	C	C	M	C	C	C	C	C	C	C	C	A	C	C	C	M	C	C	C	C	C	C	C	C	C	C	C	M	C	C
S1B_551901444	A/G	1B	551901444	+	A	A	A	A	A	A	A	A	A	A	A	A	A	A	A	A	A	R	A	A	A	A	A	A	A	A	G	A	A	A	R	A	A	A	A	A	A	A	A	A	A	A	R	A	A
S1B_551901473	C/G	1B	551901473	+	C	C	C	C	C	C	C	C	C	C	C	C	C	C	C	C	C	S	C	C	C	C	C	C	C	C	G	C	C	C	S	C	C	C	C	C	C	C	C	C	C	C	S	C	C
S1B_551901474	A/G	1B	551901474	+	A	A	A	A	A	A	A	A	A	A	A	A	A	A	A	A	A	R	A	A	A	A	A	A	A	A	G	A	A	A	R	A	A	A	A	A	A	A	A	A	A	A	R	A	A
S1B_552164985	A/G	1B	552164985	+	G	A	G	G	G	A	G	G	A	G	A	A	G	A	A	A	A	R	G	A	A	A	R	R	R	A	A	A	A	A	A	A	G	A	A	G	A	A	A	G	A	G	A	G	A
S1B_552987308	G/A	1B	552987308	+	A	G	A	A	A	G	A	A	G	A	G	G	A	G	A	A	G	G	A	G	G	A	A	A	A	G	G	A	G	G	G	G	A	G	G	A	G	G	G	A	G	A	G	A	G
S1B_553012254	C/G	1B	553012254	+	C	C	C	C	C	C	C	C	C	C	C	C	C	C	C	C	C	S	C	C	C	C	C	C	C	C	C	C	C	C	S	S	C	C	C	S	C	C	S	C	C	C	C	C	C
S1B_554306148	C/G	1B	554306148	+	G	C	G	G	G	C	G	G	C	G	C	C	G	C	G	G	C	C	G	C	C	G	G	G	G	C	C	G	C	C	C	C	G	C	C	G	C	C	C	G	C	G	C	G	C
S1B_554697969	T/C	1B	554697969	+	C	T	C	C	C	T	C	C	T	C	T	T	Y	T	C	C	T	T	C	T	T	C	C	C	C	T	T	C	T	T	T	T	C	T	T	C	T	T	T	C	T	C	T	C	T
S1B_554698228	G/C	1B	554698228	+	G	G	G	G	G	G	G	G	G	C	G	G	G	G	G	G	G	G	S	G	G	G	G	G	G	G	G	S	G	G	G	G	G	G	G	G	G	G	G	G	G	G	G	G	G
S1B_555335758	G/A	1B	555335758	+	A	G	A	A	A	G	A	A	G	A	G	G	A	G	A	A	G	G	A	G	G	A	A	A	A	G	G	A	G	G	G	G	A	G	G	A	G	G	G	A	G	A	G	A	G
S1B_555344064	T/C	1B	555344064	+	C	T	T	T	C	T	C	C	T	C	T	T	C	T	C	T	T	T	C	T	T	C	C	C	C	T	T	C	T	T	T	T	C	T	T	C	T	T	T	C	T	C	T	Y	T
S1B_555392342	A/T	1B	555392342	+	T	A	T	T	T	A	T	T	A	T	A	A	T	A	T	T	A	A	T	A	A	T	T	T	T	A	A	T	A	A	A	A	T	A	A	T	A	A	A	T	A	T	A	T	A
S1B_555392343	A/T	1B	555392343	+	T	A	T	T	T	A	T	T	A	T	A	A	T	A	T	T	A	A	T	A	A	T	T	T	T	A	A	T	A	A	A	A	T	A	A	T	A	A	A	T	A	T	A	T	A
S1B_555613220	G/C	1B	555613220	+	C	G	C	C	C	G	C	C	G	C	G	G	C	G	C	C	G	G	C	G	G	C	C	C	C	G	G	C	G	G	G	G	C	G	G	C	G	G	G	C	G	C	G	C	G
S1B_556167164	T/C	1B	556167164	+	T	T	T	T	T	T	T	T	T	T	T	T	T	T	T	T	T	T	T	T	T	T	T	T	T	T	T	T	T	T	T	T	T	T	T	T	T	T	T	T	T	T	C	T	T
S1B_556325945	C/T	1B	556325945	+	C	C	C	C	C	C	C	C	C	C	C	C	C	C	T	T	C	C	C	C	C	T	C	C	C	C	C	T	C	C	C	C	C	C	C	C	C	C	C	C	C	C	C	C	C
S1B_556501604	T/C	1B	556501604	+	T	T	T	T	T	T	T	T	T	T	T	T	T	T	T	T	T	Y	T	T	T	T	T	T	T	T	Y	T	T	T	Y	Y	T	T	T	C	T	T	Y	T	T	T	T	T	T
S1B_556733288	C/T	1B	556733288	+	C	C	C	C	C	C	C	C	C	C	C	C	C	C	T	T	C	C	C	C	C	T	C	C	C	C	C	T	C	C	C	C	C	C	C	C	C	C	C	C	C	C	C	C	C
S1B_556923835	G/A	1B	556923835	+	G	G	G	G	G	G	G	G	G	A	G	G	G	G	A	A	G	G	G	G	G	A	G	G	G	G	G	A	G	G	G	G	G	G	G	G	G	G	G	G	G	G	G	G	G
S1B_557027417	T/C	1B	557027417	+	C	C	C	C	C	T	C	C	T	C	T	C	C	C	C	C	C	C	C	C	C	C	C	C	C	C	T	C	T	T	T	T	C	T	T	C	T	T	T	C	T	C	T	C	T
S1B_557027455	A/G	1B	557027455	+	G	G	G	G	G	A	G	G	A	G	A	G	G	G	G	G	G	G	G	G	G	G	G	G	G	G	A	G	A	A	A	A	G	A	A	G	A	A	A	G	A	G	A	G	A
S1B_557027458	G/A	1B	557027458	+	G	G	G	G	G	A	G	G	A	G	A	G	G	G	G	G	G	G	G	G	G	G	G	G	G	G	A	G	A	A	A	A	G	A	A	G	A	A	A	G	A	G	G	G	A
S1B_557189402	T/G	1B	557189402	+	T	T	T	T	T	T	T	T	T	T	K	T	T	T	T	T	T	K	T	T	T	T	T	T	T	T	T	T	K	T	K	T	T	T	T	T	T	T	T	T	T	T	T	T	T
S1B_557189432	T/A	1B	557189432	+	A	A	A	A	A	T	A	A	T	W	T	A	A	A	A	A	A	A	A	A	A	A	A	A	A	A	T	A	T	T	T	T	A	T	T	A	T	T	T	A	T	A	T	A	T
S1B_557348987	T/A	1B	557348987	+	A	A	A	A	A	T	A	A	T	W	T	A	A	A	A	A	A	A	A	A	A	A	A	A	A	A	T	A	T	T	T	T	A	T	T	A	T	T	T	A	T	A	T	A	T
S1B_557348997	A/G	1B	557348997	+	G	G	G	G	G	A	G	G	A	R	A	G	G	G	G	G	G	G	G	G	G	G	G	G	G	G	A	G	A	A	A	A	G	A	A	G	A	A	A	G	A	G	A	G	A
S1B_557393845	C/T	1B	557393845	+	T	T	T	T	T	C	T	T	C	C	C	T	T	T	T	T	T	T	T	T	T	T	T	T	T	T	C	T	C	C	C	C	T	C	C	T	C	C	C	T	C	T	C	T	C
S1B_557620148	G/T	1B	557620148	+	G	G	G	G	G	T	K	G	G	G	T	G	K	G	T	K	T	K	G	G	K	K	G	G	G	G	G	G	K	K	K	G	G	G	T	G	G	G	G	G	G	G	G	G	G
S1B_557737623	A/G	1B	557737623	+	A	A	A	A	A	A	A	A	A	A	A	A	A	A	G	G	A	A	A	A	A	G	A	A	A	A	A	G	A	A	A	A	A	A	A	A	A	A	A	A	A	A	A	A	A
S1B_557936459	G/C	1B	557936459	+	G	G	G	G	G	G	G	G	G	G	G	G	G	G	C	C	G	G	G	G	G	C	G	G	G	G	G	C	G	G	G	G	G	G	G	G	G	G	G	G	G	G	G	G	G
S1B_557936461	A/G	1B	557936461	+	A	A	A	A	A	A	A	A	A	A	A	A	A	A	G	G	A	A	A	A	A	G	A	A	A	A	A	G	A	A	A	A	A	A	A	A	A	A	A	A	A	A	A	A	A
S1B_557936471	C/G	1B	557936471	+	C	C	C	C	C	C	C	C	C	C	C	C	C	C	G	G	C	C	C	C	C	G	C	C	C	C	C	G	C	C	C	C	C	C	C	C	C	C	C	C	C	C	C	C	C
S1B_558422615	T/G	1B	558422615	+	T	T	T	G	T	T	T	T	T	T	T	T	T	T	T	T	T	T	T	T	T	T	T	T	T	T	T	T	T	T	T	T	T	T	T	T	T	T	T	T	T	T	G	T	T
S1B_558422632	C/T	1B	558422632	+	C	C	C	T	C	C	C	C	C	C	C	C	C	C	C	C	C	C	C	C	C	C	C	C	C	C	C	C	C	C	C	C	C	C	C	C	C	C	C	C	C	C	C	C	C
S1B_558976717	C/T	1B	558976717	+	C	C	C	T	C	C	C	C	C	C	C	C	C	C	C	C	C	C	C	C	C	C	C	C	C	C	C	C	C	C	C	C	C	C	C	C	C	C	C	C	C	C	C	C	C
S1B_558976740	C/G	1B	558976740	+	C	C	C	G	C	C	C	C	C	G	C	C	C	C	C	G	C	C	C	C	C	G	C	C	C	C	C	G	C	C	C	C	C	C	C	C	C	C	C	C	C	C	G	C	C
S1B_558976754	A/G	1B	558976754	+	A	A	A	G	A	A	A	A	A	A	A	A	A	A	A	A	A	A	A	A	A	A	A	A	A	A	A	A	A	A	A	A	A	A	A	A	A	A	A	A	A	A	A	A	A
S1B_558979795	T/C	1B	558979795	+	T	T	T	C	T	T	T	T	T	T	T	T	T	T	T	T	T	T	T	T	T	T	T	T	T	T	T	T	T	T	T	T	T	T	T	T	T	T	T	T	T	T	T	T	T
S1B_558979819	C/T	1B	558979819	+	C	C	C	T	C	C	C	C	C	C	C	C	C	C	C	C	C	C	C	C	C	C	C	C	C	C	C	C	C	C	C	C	C	C	C	C	C	C	C	C	C	C	C	C	C
S1B_558979827	T/A	1B	558979827	+	T	T	T	A	T	T	T	T	T	T	T	T	T	T	T	T	T	T	T	T	T	T	T	T	T	T	T	T	T	T	T	T	T	T	T	T	T	T	T	T	T	T	T	T	T
S1B_559006038	C/T	1B	559006038	+	C	C	C	T	C	C	C	C	C	C	C	C	C	C	C	C	C	C	C	C	C	C	C	C	C	C	C	C	C	C	C	C	C	C	C	C	C	C	C	C	C	C	C	C	C
S1B_559006070	G/C	1B	559006070	+	G	G	G	C	G	G	G	G	G	G	G	G	G	G	G	G	G	G	G	G	G	G	G	G	G	G	G	G	G	G	G	G	G	G	G	G	G	G	G	G	G	G	G	G	G
S1B_559962731	T/A	1B	559962731	+	T	T	T	W	T	T	T	W	W	T	T	T	T	T	T	T	T	T	T	T	T	T	T	T	T	T	A	T	T	T	T	W	T	T	T	T	T	T	W	T	T	T	T	T	T
S1B_559962775	C/T	1B	559962775	+	C	C	C	Y	C	C	C	Y	Y	C	C	C	C	C	C	C	C	C	C	C	C	C	C	C	C	C	T	C	C	C	C	Y	C	C	C	C	C	C	Y	C	C	C	C	C	C
S1B_560634980	A/G	1B	560634980	+	G	G	G	G	G	A	G	G	A	A	A	G	G	G	G	G	G	G	G	G	G	G	G	G	G	A	A	G	A	A	A	A	G	A	A	G	A	A	A	G	A	G	G	G	A
S1B_560634988	G/A	1B	560634988	+	A	A	A	A	A	G	A	A	G	G	G	A	A	A	A	A	A	A	A	A	A	A	A	A	A	G	G	A	G	G	G	G	A	G	G	A	G	G	G	A	G	A	G	A	G
S1B_560635003	A/C	1B	560635003	+	C	C	C	C	C	A	C	C	A	A	A	C	C	C	C	C	C	C	C	C	C	C	C	C	C	A	A	C	A	A	A	A	C	A	A	C	A	A	A	C	A	C	C	C	A
S1B_560635013	G/C	1B	560635013	+	C	C	C	C	C	G	C	C	G	G	G	C	C	C	C	C	C	C	C	C	C	C	C	C	C	G	G	C	G	G	G	G	C	G	G	C	G	G	G	C	G	C	C	C	G
S1B_561698929	A/T	1B	561698929	+	A	W	A	W	W	A	A	A	A	A	A	W	A	W	A	A	A	W	W	T	T	A	W	A	W	A	A	A	A	A	A	A	A	A	A	A	A	A	A	A	A	A	A	A	A
S1B_561779164	G/A	1B	561779164	+	A	A	A	A	A	G	A	A	G	R	G	A	A	A	A	A	A	A	A	A	A	A	A	A	A	A	G	A	G	G	G	G	A	G	G	A	G	G	G	A	G	A	A	A	G
S1B_561780311	C/A	1B	561780311	+	C	A	C	A	C	C	C	C	C	M	C	A	C	A	C	C	A	A	A	A	A	C	A	A	A	C	C	C	C	C	C	C	C	C	C	C	C	C	C	C	C	C	C	C	C
S1B_561983458	T/C	1B	561983458	+	C	T	C	T	T	T	C	C	T	T	T	T	C	T	C	C	T	T	T	T	T	C	T	T	T	T	T	C	Y	T	T	T	C	T	T	C	T	T	T	C	T	C	T	C	T
S1B_562801518	C/T	1B	562801518	+	C	C	C	T	C	C	C	C	C	C	C	C	C	C	T	T	C	C	C	C	C	T	C	C	C	C	C	T	C	C	C	C	C	C	C	C	C	C	C	C	C	C	C	C	C
S1B_562957125	G/A	1B	562957125	+	A	G	A	G	A	G	A	A	G	G	G	G	A	G	G	G	G	G	G	G	G	G	G	G	G	G	G	G	G	G	G	G	A	G	G	A	G	G	G	A	G	A	G	A	G
S1B_564603849	G/A	1B	564603849	+	A	A	A	G	A	G	A	A	G	G	G	A	A	A	G	G	A	A	A	A	A	G	A	A	A	A	G	G	G	G	G	G	A	G	G	A	G	G	G	A	G	A	A	A	G
S1B_564603885	A/G	1B	564603885	+	G	G	G	A	G	A	G	G	A	A	A	G	G	G	A	A	G	G	G	G	G	A	G	G	G	G	A	A	A	A	A	A	G	A	A	G	A	A	A	G	A	G	G	G	A
S1B_564622069	T/A	1B	564622069	+	T	T	W	T	W	W	T	T	W	A	T	T	T	T	W	W	W	A	T	A	A	T	T	A	W	W	T	T	A	T	T	T	T	T	T	T	T	T	T	T	T	T	T	T	T
S1B_564622078	C/T	1B	564622078	+	C	T	C	C	Y	Y	C	C	Y	C	C	C	C	T	Y	Y	Y	C	C	C	C	C	C	C	Y	C	T	C	C	C	C	C	C	C	C	C	C	C	C	C	C	C	C	C	C
S1B_564904582	C/T	1B	564904582	+	T	T	T	C	T	C	T	T	C	C	C	T	T	T	C	C	T	T	T	T	T	C	T	T	T	T	C	C	C	C	C	C	T	C	C	T	C	C	C	T	C	T	T	T	C
S1B_564904603	G/A	1B	564904603	+	A	A	A	G	A	G	A	A	G	G	G	A	A	A	G	G	A	A	A	A	A	G	A	A	A	A	G	G	G	G	G	G	A	G	G	A	G	G	G	A	G	A	A	A	G
S1B_565195673	T/A	1B	565195673	+	T	A	T	T	T	T	T	T	T	T	T	A	T	A	T	T	A	A	A	A	A	T	A	A	A	A	T	T	T	T	T	T	T	T	T	T	T	T	T	T	T	T	T	T	T
S1B_565241435	C/A	1B	565241435	+	A	C	A	C	C	C	A	A	C	C	C	C	A	C	C	C	C	C	C	C	C	C	C	C	C	C	C	C	C	C	C	C	A	C	C	A	C	C	C	A	C	A	C	A	C
S1B_565255490	G/C	1B	565255490	+	G	G	G	G	G	G	G	G	G	G	G	G	G	G	C	C	G	G	G	G	G	C	G	G	G	G	G	C	G	G	G	G	G	G	G	G	G	G	G	G	G	G	G	G	G
S1B_565589160	G/A	1B	565589160	+	A	G	A	G	G	G	A	A	G	G	G	G	A	G	G	G	G	G	G	G	G	G	G	G	G	G	G	G	G	G	G	G	A	G	G	A	G	G	G	A	G	A	G	A	G
S1B_565589170	G/A	1B	565589170	+	G	G	G	G	G	G	G	G	G	G	G	G	G	G	A	A	G	G	G	G	A	A	G	G	G	G	G	A	G	G	G	G	G	G	G	G	G	G	G	G	G	G	G	G	G
S1B_565767114	A/C	1B	565767114	+	C	A	C	C	C	A	C	C	A	M	A	A	C	A	C	C	A	A	C	A	A	C	A	A	A	A	A	C	A	A	A	A	C	A	A	C	A	A	A	C	A	C	A	C	A
S1B_565769880	G/C	1B	565769880	+	G	G	G	G	G	G	G	G	G	G	G	S	G	G	G	G	S	G	G	G	S	G	G	G	S	G	G	S	G	G	S	G	G	G	G	G	G	G	G	G	G	G	G	S	G
S1B_566005382	T/A	1B	566005382	+	T	T	T	T	A	T	T	T	T	T	T	T	T	T	A	A	T	T	T	T	T	A	T	T	T	T	T	A	T	T	T	T	T	T	T	T	T	T	T	T	T	T	T	T	T
S1B_566686631	A/G	1B	566686631	+	A	G	A	A	A	A	A	A	A	A	A	G	A	G	A	A	G	G	G	G	G	A	G	G	G	G	A	A	A	A	A	A	A	A	A	A	A	A	A	A	A	A	A	A	A
S1B_566920983	G/A	1B	566920983	+	A	G	A	G	G	G	A	A	G	G	G	G	A	G	G	G	G	G	G	G	G	G	G	G	G	G	G	G	G	G	G	G	A	G	G	A	G	G	G	A	G	A	G	A	G
S1B_566987550	A/G	1B	566987550	+	R	A	A	A	A	A	A	A	A	A	A	G	A	A	A	A	R	A	A	A	A	A	R	A	A	A	A	A	A	R	A	A	A	A	A	A	A	A	A	A	A	A	A	G	A
S1B_566987558	C/A	1B	566987558	+	M	C	A	C	C	C	A	A	C	C	C	C	A	C	C	C	C	C	C	C	C	C	C	C	C	C	C	C	C	C	C	C	A	C	C	A	C	C	C	A	C	A	C	C	C
S1B_566987570	A/G	1B	566987570	+	R	A	A	A	A	A	A	A	A	A	A	G	A	A	A	A	R	A	A	A	A	A	R	A	A	A	A	A	A	R	A	A	A	A	A	A	A	A	A	A	A	A	A	G	A
S1B_566987576	G/A	1B	566987576	+	R	G	G	G	G	G	G	G	G	G	G	A	G	G	G	G	R	G	G	G	G	G	R	G	G	G	G	G	G	R	G	G	G	G	G	G	G	G	G	G	G	G	G	A	G
S1B_566987584	T/C	1B	566987584	+	Y	T	C	T	T	T	C	C	T	T	T	T	C	T	T	T	T	T	T	T	T	T	T	T	T	T	T	T	T	T	T	T	C	T	T	C	T	T	T	C	T	C	T	T	T
S1B_567816334	C/T	1B	567816334	+	C	C	C	C	C	C	C	C	C	C	C	C	C	C	T	T	C	C	C	C	C	T	C	C	C	C	C	T	C	C	C	C	C	C	C	C	C	C	C	C	C	C	C	C	C
S1B_567967907	G/C	1B	567967907	+	C	G	C	G	C	G	C	C	G	S	G	G	C	G	C	C	G	G	G	G	G	C	G	G	G	G	G	C	G	G	G	G	C	G	G	C	G	G	G	C	G	C	G	C	G
S1B_568017474	G/A	1B	568017474	+	G	G	G	G	G	G	G	G	G	G	G	G	G	G	G	G	G	G	G	G	G	G	G	G	G	G	G	G	G	G	G	G	G	G	G	G	G	G	G	G	G	G	A	G	G
S1B_568017510	C/A	1B	568017510	+	A	C	A	C	C	C	A	A	C	C	C	C	A	C	C	C	C	C	C	C	C	C	C	C	C	C	C	C	C	C	C	C	A	C	C	A	C	C	C	A	C	A	C	A	C
S1B_568017518	A/C	1B	568017518	+	A	A	A	A	A	A	A	A	A	A	A	A	A	A	A	A	A	A	A	A	A	A	A	A	A	A	A	A	A	A	A	A	A	A	A	A	A	A	A	A	A	A	C	A	A
S1B_568017523	G/A	1B	568017523	+	G	G	G	G	G	G	G	G	G	G	G	G	G	G	G	G	G	G	G	G	G	G	G	G	G	G	G	G	G	G	G	G	G	G	G	G	G	G	G	G	G	G	A	G	G
S1B_568241568	G/A	1B	568241568	+	G	G	G	G	G	G	G	G	G	R	G	G	G	G	G	G	G	G	G	G	G	G	G	G	G	G	G	G	G	G	G	G	G	G	G	G	G	G	G	G	G	G	A	G	G
S1B_568248665	T/C	1B	568248665	+	T	T	T	T	T	T	T	T	T	Y	T	T	T	T	C	C	T	T	T	T	T	C	T	T	T	T	T	C	T	T	T	T	T	T	T	T	T	T	T	T	T	T	C	T	T
S1B_568408428	G/A	1B	568408428	+	G	G	G	G	A	G	G	G	G	G	G	G	G	G	A	A	G	G	G	G	G	A	G	G	G	G	G	A	G	G	G	G	G	G	G	G	G	G	G	G	G	G	G	G	G
S1B_568408440	G/A	1B	568408440	+	A	G	A	G	G	G	A	A	G	G	G	G	A	G	G	G	G	G	G	G	G	G	G	G	G	G	G	G	G	G	G	G	A	G	G	A	G	G	G	A	G	A	A	G	G
S1B_568408464	T/C	1B	568408464	+	C	T	C	T	T	T	C	C	T	T	T	T	C	T	T	T	T	T	T	T	T	T	T	T	T	T	T	T	T	T	T	T	C	T	T	C	T	T	T	C	T	C	C	T	T
S1B_568786651	G/C	1B	568786651	+	G	G	G	G	G	G	S	G	G	G	G	G	G	G	G	G	S	G	S	G	G	G	G	G	G	G	S	G	G	G	G	G	G	G	C	G	G	G	G	G	S	G	G	S	G
S1B_568979526	C/A	1B	568979526	+	C	C	C	C	C	C	C	C	C	C	C	C	C	C	A	A	C	C	C	C	C	A	C	C	C	C	C	A	C	C	C	C	C	C	C	C	C	C	C	C	C	C	C	C	C
S1B_569136635	G/A	1B	569136635	+	G	G	A	G	G	G	R	R	G	G	G	G	G	G	G	G	G	G	G	G	G	G	G	G	G	G	G	G	G	G	G	G	A	G	G	R	G	G	G	R	G	R	G	R	G
S1B_569147112	G/T	1B	569147112	+	T	G	G	G	G	G	T	K	G	G	G	G	T	G	G	G	G	G	G	G	G	G	G	G	G	G	G	G	G	G	G	G	K	G	G	T	G	G	G	G	G	G	G	G	G
S1B_569163208	G/A	1B	569163208	+	G	G	R	G	R	G	A	R	G	A	G	G	R	G	G	G	G	G	G	G	G	G	G	G	G	G	G	G	G	G	G	G	G	G	G	A	G	G	G	G	G	G	G	R	G
S1B_569163209	T/C	1B	569163209	+	T	T	Y	T	Y	T	C	Y	T	C	T	T	Y	T	T	T	T	T	T	T	T	T	T	T	T	T	T	T	T	T	T	T	T	T	T	C	T	T	T	T	T	T	T	Y	T
S1B_569166147	G/A	1B	569166147	+	A	G	A	G	R	G	A	R	G	A	G	G	R	G	G	G	G	G	G	G	G	G	G	G	G	G	G	G	G	G	G	G	A	G	G	R	G	G	G	R	G	R	G	R	G
S1B_569166150	G/C	1B	569166150	+	C	G	C	G	S	G	C	S	G	C	G	G	S	G	G	G	G	G	G	G	G	G	G	G	G	G	G	G	G	G	G	G	C	G	G	S	G	G	G	S	G	S	G	S	G
S1B_569301541	T/C	1B	569301541	+	T	T	C	T	C	T	C	C	T	T	C	T	T	T	T	T	T	T	C	T	T	T	T	T	T	T	Y	T	T	C	T	T	T	Y	C	T	T	C	T	T	T	Y	C	T	T
S1B_569301550	G/A	1B	569301550	+	G	G	G	G	G	G	G	G	G	G	A	G	G	G	G	G	G	G	G	G	G	G	G	G	G	G	R	G	G	A	G	G	G	G	A	G	G	G	G	G	G	R	G	G	G
S1B_569301572	T/C	1B	569301572	+	T	T	T	T	T	T	T	T	T	T	C	T	T	T	T	T	T	T	T	T	T	T	T	T	T	T	Y	T	T	C	T	T	T	T	C	T	T	T	T	T	T	Y	T	T	T
S1B_569699957	T/C	1B	569699957	+	C	T	C	T	T	T	C	C	T	T	T	T	C	T	T	T	T	T	T	T	T	T	T	T	T	T	T	T	T	T	T	T	C	T	T	C	T	T	T	C	T	C	T	C	T
S1B_569736110	A/C	1B	569736110	+	A	C	A	C	A	A	A	A	A	A	A	C	A	C	A	A	C	C	C	C	C	A	C	C	C	C	A	A	A	A	A	A	C	A	A	A	A	A	A	A	A	A	A	A	A
S1B_569786935	A/G	1B	569786935	+	G	G	G	G	G	A	G	G	A	A	A	G	G	G	A	A	G	G	G	G	G	A	G	G	G	G	A	A	A	A	A	A	G	A	A	G	A	A	A	G	A	G	G	G	A
S1B_570048330	A/G	1B	570048330	+	G	G	G	G	G	A	G	G	A	G	A	G	G	G	A	A	G	G	G	G	G	A	G	G	G	G	A	A	A	A	A	A	G	A	A	G	A	A	A	G	A	G	A	R	A
S1B_570107822	A/T	1B	570107822	+	T	T	T	T	T	A	T	T	A	W	A	T	T	T	A	A	T	T	T	T	T	A	T	T	T	T	A	A	A	A	A	A	T	A	A	T	A	A	A	T	A	T	A	T	A
S1B_570343648	C/G	1B	570343648	+	C	G	C	G	C	C	C	C	C	C	G	G	C	G	C	C	G	G	G	G	G	C	G	G	G	G	C	C	C	G	C	C	C	C	G	C	C	G	C	C	C	C	C	C	C
S1B_570406470	C/A	1B	570406470	+	C	C	C	C	C	C	C	C	C	C	C	C	C	C	A	A	C	C	C	C	C	A	C	C	C	C	C	A	C	C	C	C	C	C	C	C	C	C	C	C	C	C	C	C	C
S1B_570566499	G/A	1B	570566499	+	A	G	A	G	G	G	A	A	G	G	G	G	A	G	G	G	G	G	G	G	G	G	G	G	G	G	G	G	G	G	G	G	A	G	G	A	G	G	G	A	G	A	G	A	G
S1B_570724331	C/A	1B	570724331	+	C	C	C	C	C	C	C	C	C	C	C	C	C	C	A	A	C	C	C	C	C	A	C	C	C	C	C	A	C	C	C	C	C	C	C	C	C	C	C	C	C	C	C	C	C
S1B_570751905	C/A	1B	570751905	+	M	C	C	C	C	C	M	M	C	C	C	C	M	C	C	C	C	C	C	C	C	C	C	C	C	C	C	C	C	C	C	C	C	C	C	M	C	C	C	A	C	M	C	M	C
S1B_571064949	A/G	1B	571064949	+	G	A	G	A	G	A	G	G	A	A	A	A	G	A	A	A	A	A	A	A	A	A	A	A	A	A	A	A	A	A	A	A	G	A	A	G	A	A	A	G	A	G	G	G	A
S1B_571336930	T/C	1B	571336930	+	C	T	C	T	C	T	C	C	T	T	T	T	C	T	T	T	T	T	T	T	T	T	T	T	T	T	T	T	T	T	T	T	C	T	T	C	T	T	T	C	T	C	T	C	T
S1B_571337021	C/G	1B	571337021	+	G	C	G	C	G	C	G	G	C	C	C	C	G	C	C	C	C	C	C	C	C	C	C	C	C	C	C	C	C	C	C	C	G	C	C	G	C	C	C	G	C	G	C	G	C
S1B_571397056	G/A	1B	571397056	+	G	A	G	A	G	G	G	G	G	G	A	A	G	A	G	G	A	A	A	A	A	G	A	A	A	A	G	G	G	A	G	G	G	G	A	G	G	A	G	G	G	G	A	G	G
S1B_571414193	C/G	1B	571414193	+	C	G	C	G	C	C	C	C	C	C	G	G	C	G	C	S	G	G	G	G	G	C	G	G	G	G	C	C	C	G	C	C	S	C	G	C	C	G	C	C	C	C	C	C	C
S1B_571414219	C/T	1B	571414219	+	C	C	C	C	C	T	C	C	T	T	C	C	C	C	T	Y	C	C	C	C	C	T	C	C	C	C	T	T	T	C	T	T	C	T	C	C	T	C	T	C	T	C	C	C	T
S1B_571860924	A/G	1B	571860924	+	A	A	A	A	A	R	A	A	A	A	A	A	R	A	A	A	A	A	A	A	A	A	A	A	A	A	A	A	A	A	A	A	R	A	A	A	R	A	A	A	A	R	A	A	A
S1B_572295566	G/A	1B	572295566	+	A	A	A	A	G	G	A	A	G	G	A	A	A	A	G	G	A	A	A	A	A	G	A	A	A	A	G	G	G	A	G	G	A	G	A	A	G	A	G	A	G	A	G	A	G
S1B_572441272	A/G	1B	572441272	+	A	A	A	A	A	A	A	A	A	A	A	A	A	A	A	A	A	G	A	A	A	A	A	A	A	A	R	A	A	A	R	R	A	A	A	R	A	A	G	A	A	A	A	A	A
S1B_572700913	A/G	1B	572700913	+	G	A	G	A	A	A	G	G	A	A	A	A	A	A	A	A	A	A	A	A	A	A	A	A	A	A	A	A	A	A	A	A	G	A	A	G	A	A	A	G	A	G	A	G	A
S1B_572701117	G/A	1B	572701117	+	A	G	A	G	A	G	A	A	G	G	G	G	A	G	G	G	G	G	G	G	G	G	G	G	G	G	G	G	G	G	G	G	A	G	G	A	G	G	G	A	G	A	A	A	G
S1B_572783386	C/T	1B	572783386	+	T	C	T	C	C	C	T	T	C	C	C	C	T	C	C	C	C	C	C	C	C	C	C	C	C	C	C	C	C	C	C	C	T	C	C	T	C	C	C	T	C	T	T	T	C
S1B_572783419	C/A	1B	572783419	+	C	C	C	C	C	A	C	C	C	C	C	C	C	C	C	C	C	C	M	C	C	C	C	C	C	M	M	C	M	C	C	C	C	C	C	C	C	C	C	C	C	C	C	C	C
S1B_572783425	G/T	1B	572783425	+	G	G	G	G	G	G	G	G	G	G	G	G	G	K	G	G	K	G	G	G	G	G	G	K	G	G	G	G	G	G	K	G	G	G	K	G	G	G	K	G	G	G	G	G	G
S1B_572977027	G/A	1B	572977027	+	G	G	G	G	G	A	G	G	A	A	G	G	G	G	G	G	G	G	G	G	G	G	G	G	G	G	A	G	A	G	A	A	G	A	G	G	A	G	A	G	A	G	A	G	A
S1B_572977719	A/G	1B	572977719	+	A	A	A	A	A	G	A	A	G	A	A	A	A	A	A	A	A	A	A	A	A	A	A	A	A	A	G	A	G	A	G	G	A	G	A	A	G	A	G	A	G	A	G	A	G
S1B_572977725	C/T	1B	572977725	+	C	C	C	C	T	C	C	C	C	C	T	C	C	C	C	C	C	C	C	C	C	C	C	C	C	C	C	C	C	T	C	C	C	C	T	C	C	T	C	C	C	C	C	C	C
S1B_572990313	G/A	1B	572990313	+	A	G	A	G	G	G	A	A	G	G	G	G	A	G	G	G	G	G	G	G	G	G	A	A	A	G	G	G	G	G	G	G	A	G	G	A	G	G	G	A	G	A	G	A	G
S1B_573166453	A/G	1B	573166453	+	G	G	G	G	A	A	G	G	A	A	A	G	G	G	G	G	G	G	G	G	G	G	G	G	G	G	A	G	A	A	A	A	G	A	A	G	A	A	A	G	A	G	A	G	A
S1B_573166472	G/A	1B	573166472	+	G	G	G	G	G	A	G	G	A	A	G	G	G	G	G	G	G	G	G	G	G	G	G	G	G	G	A	G	A	G	A	A	G	A	G	G	A	G	A	G	A	G	A	G	A
S1B_573683929	A/G	1B	573683929	+	A	A	A	A	A	A	A	A	A	A	R	A	A	A	A	A	A	A	A	A	A	A	A	A	A	A	A	A	A	A	A	A	A	A	R	A	A	A	A	A	G	A	A	A	A
S1B_574028891	A/G	1B	574028891	+	A	G	A	G	G	A	A	A	A	A	G	G	A	G	A	A	G	G	G	G	G	A	A	A	A	G	A	A	A	G	A	A	A	A	G	A	A	G	A	A	A	A	A	A	A
S1B_574043062	G/T	1B	574043062	+	G	G	G	G	T	G	G	G	G	G	T	G	G	G	G	G	G	G	G	G	G	G	G	G	G	G	G	G	G	T	G	G	G	G	T	G	G	T	G	G	G	G	G	G	G
S1B_574043063	C/T	1B	574043063	+	C	C	C	C	T	C	C	C	C	C	T	C	C	C	C	C	C	C	C	C	C	C	C	C	C	C	C	C	C	T	C	C	C	C	T	C	C	T	C	C	C	C	C	C	C
S1B_574043084	G/A	1B	574043084	+	G	A	G	A	A	G	G	G	G	G	A	A	G	A	G	G	A	A	A	A	A	G	G	G	G	A	G	G	G	A	G	G	G	G	A	G	G	A	G	G	G	G	A	G	G
S1B_574565888	G/T	1B	574565888	+	G	G	G	G	G	G	G	G	G	G	K	G	G	K	G	K	G	G	G	G	G	G	G	G	G	G	G	G	G	G	G	G	G	G	K	G	G	K	G	G	G	G	G	G	G
S1B_574819580	A/G	1B	574819580	+	A	A	A	A	G	A	A	A	A	A	G	A	A	A	A	A	A	A	A	A	A	A	A	A	A	A	A	A	A	G	A	A	A	A	G	A	A	G	A	A	A	A	A	A	A
S1B_574819763	T/C	1B	574819763	+	T	Y	T	T	C	T	T	T	T	T	C	T	T	T	T	T	T	T	T	T	T	T	T	T	T	T	T	T	T	C	T	T	T	T	C	T	T	C	T	T	T	T	C	T	T
S1B_575575122	C/G	1B	575575122	+	C	G	C	G	G	C	C	C	C	C	G	G	C	G	C	C	G	G	G	G	G	C	C	C	C	G	C	C	C	G	C	C	C	C	G	C	C	G	C	C	C	C	G	C	C
S1B_575787917	G/C	1B	575787917	+	G	C	G	C	C	G	G	G	G	G	C	C	G	C	G	G	C	C	C	C	C	G	G	G	G	C	G	G	G	C	G	G	G	G	C	G	G	C	G	G	G	G	C	G	G
S1B_576019279	T/C	1B	576019279	+	T	C	T	C	C	T	T	T	T	T	C	C	T	C	T	T	C	C	C	C	C	T	T	T	T	C	T	T	T	C	T	T	T	T	C	T	T	C	T	T	T	T	T	T	T
S1B_576345088	C/T	1B	576345088	+	C	C	C	C	C	C	C	C	C	C	C	C	C	Y	C	C	C	C	C	T	Y	C	C	C	C	Y	C	C	C	C	C	C	C	C	C	C	C	C	C	C	C	C	C	C	C
S1B_576799927	G/T	1B	576799927	+	G	T	G	T	G	G	G	G	G	G	G	T	G	T	G	G	T	T	T	T	T	G	G	G	G	T	G	G	G	G	G	G	G	G	G	G	G	G	G	G	G	G	G	G	G
S1B_577100633	T/C	1B	577100633	+	T	T	T	T	C	T	T	T	T	T	C	T	T	T	T	T	T	T	T	T	T	T	T	T	T	T	T	T	T	C	T	T	T	T	C	T	T	C	T	T	T	T	T	T	T
S1B_577121153	G/A	1B	577121153	+	G	G	G	A	G	G	G	G	G	G	R	G	G	G	G	G	G	G	G	G	G	G	G	G	G	G	G	G	G	R	G	G	G	G	R	G	G	R	G	G	G	G	R	G	G
S1B_577882266	G/A	1B	577882266	+	G	G	G	A	G	G	G	G	G	G	G	G	G	G	G	G	G	G	G	G	G	G	G	G	G	G	G	G	G	G	G	G	G	G	G	G	G	G	G	G	G	G	G	G	G
S1B_578011313	A/G	1B	578011313	+	A	A	A	A	A	A	A	A	A	R	A	A	A	A	A	A	A	A	A	A	A	G	A	A	A	A	A	G	A	A	A	A	A	A	A	A	A	A	A	A	A	A	A	A	A
S1B_578249274	G/A	1B	578249274	+	G	G	G	A	A	G	G	G	G	G	A	G	G	G	G	G	G	G	G	G	G	A	G	G	G	G	G	A	G	A	G	G	G	G	A	G	G	A	G	G	G	G	A	G	G
S1B_578262874	C/T	1B	578262874	+	C	C	C	T	T	C	C	C	C	T	T	C	C	C	C	C	C	C	C	C	Y	T	C	C	C	C	C	T	C	T	C	C	C	C	T	C	C	T	C	C	C	C	T	C	C
S1B_578308805	G/A	1B	578308805	+	G	G	G	A	G	G	G	G	G	G	G	G	G	G	G	G	G	G	G	G	G	G	G	G	G	G	G	G	G	G	G	G	G	G	G	G	G	G	G	G	G	G	G	G	G
S1B_578513119	C/T	1B	578513119	+	C	C	C	T	T	C	C	C	C	C	C	C	C	C	C	C	C	C	C	C	C	T	C	C	C	C	C	T	C	C	C	C	C	C	C	C	C	C	C	C	C	C	T	C	C
S1B_578573002	A/C	1B	578573002	+	A	A	A	C	A	A	A	A	A	A	A	A	A	A	A	A	A	A	A	A	A	A	A	A	A	A	A	A	A	C	A	A	A	A	A	A	A	A	A	A	A	A	C	A	A
S1B_578891628	A/G	1B	578891628	+	A	A	A	G	A	A	A	A	A	A	A	A	A	A	A	A	A	A	A	A	A	A	A	A	A	A	A	A	A	A	A	A	A	A	A	A	A	A	A	A	A	A	A	A	A
S1B_578961573	C/G	1B	578961573	+	C	C	C	G	C	C	C	C	C	C	C	C	C	C	C	C	C	C	C	C	C	C	C	C	C	C	C	C	C	G	C	C	C	C	C	C	C	C	C	C	C	C	C	C	C
S1B_579816241	G/A	1B	579816241	+	G	A	G	A	A	G	G	G	A	A	A	A	G	A	G	G	A	A	A	A	A	G	G	G	G	A	G	G	G	A	G	G	G	G	A	G	G	A	G	G	G	G	A	G	G
S1B_579816257	T/A	1B	579816257	+	W	T	T	T	W	T	T	T	T	T	W	T	T	W	T	T	T	T	T	T	T	T	T	T	W	T	T	T	T	T	T	W	T	T	T	W	T	T	T	T	T	T	T	T	T
S1B_579816431	G/A	1B	579816431	+	G	A	G	A	G	G	G	G	G	G	G	A	G	A	G	G	A	A	A	A	A	G	G	G	G	A	G	G	G	G	G	G	G	G	G	G	G	G	G	G	G	G	G	G	G
S1B_579816441	A/C	1B	579816441	+	A	C	A	C	C	A	A	A	C	A	C	C	A	C	A	A	C	C	C	C	C	A	A	A	A	C	A	A	A	C	A	A	A	A	C	A	A	C	A	A	A	A	C	A	A
S1B_579816442	A/T	1B	579816442	+	A	T	A	T	T	A	A	A	T	A	T	T	A	T	A	A	T	T	T	T	T	A	A	A	A	T	A	A	A	T	A	A	A	A	T	A	A	T	A	A	A	A	T	A	A
S1B_579816443	A/C	1B	579816443	+	A	C	A	C	C	A	A	A	C	A	C	C	A	C	A	A	C	C	C	C	C	A	A	A	A	C	A	A	A	C	A	A	A	A	C	A	A	C	A	A	A	A	C	A	A
S1B_580021655	A/G	1B	580021655	+	A	A	A	G	G	A	A	A	G	R	G	A	A	A	A	A	A	A	A	A	A	G	A	A	A	A	A	G	A	G	A	A	A	R	G	A	A	G	A	A	A	A	G	A	A
S1B_581917413	C/A	1B	581917413	+	C	C	C	A	C	C	C	C	C	C	A	C	C	C	C	C	C	C	C	C	C	C	C	C	C	C	C	C	C	A	C	C	C	C	A	C	C	A	C	C	C	C	C	C	C
S1B_581917442	A/T	1B	581917442	+	A	A	A	T	T	A	A	A	T	T	T	A	A	A	A	A	A	A	A	A	A	T	A	A	A	A	A	T	A	T	A	A	A	A	T	A	A	T	A	A	A	A	T	A	A
S1B_582219977	G/T	1B	582219977	+	K	G	G	K	G	G	G	G	G	G	G	G	G	G	G	G	G	G	G	G	G	G	K	G	G	G	G	G	G	G	G	G	G	G	K	G	G	G	G	G	G	G	G	K	G
S1B_582219985	A/G	1B	582219985	+	R	A	A	R	A	A	A	A	A	A	A	A	A	A	A	A	A	A	A	A	A	A	R	A	A	A	A	A	A	A	A	A	A	A	R	A	A	A	A	A	A	A	A	R	A
S1B_582220246	C/T	1B	582220246	+	C	C	C	T	T	C	C	C	T	C	T	C	C	C	C	C	C	C	C	C	C	C	C	C	C	C	C	C	C	T	C	C	C	C	T	C	C	T	C	C	C	C	C	C	C
S1B_582718118	C/T	1B	582718118	+	C	C	C	T	C	C	C	C	C	C	T	C	C	C	C	C	C	C	C	C	C	C	C	C	C	C	C	C	C	T	C	C	C	C	T	C	C	T	C	C	C	C	C	C	C
S1B_583029893	C/G	1B	583029893	+	C	C	C	C	C	C	C	C	C	S	C	C	C	C	C	C	C	C	C	C	C	G	C	C	C	C	C	G	C	C	C	C	C	C	C	C	C	C	C	C	C	C	G	C	C
S1B_583135062	C/A	1B	583135062	+	A	C	A	C	C	A	A	A	C	C	C	C	C	C	M	A	C	C	C	C	C	C	M	A	A	C	A	C	A	C	A	A	C	M	C	A	A	C	M	M	M	M	C	A	A
S1B_583136602	C/A	1B	583136602	+	C	M	M	C	C	M	C	A	C	C	C	C	C	C	C	C	C	C	C	C	C	C	C	C	M	C	C	M	M	C	C	C	C	C	C	C	C	C	C	C	C	C	C	C	A
S1B_583216483	T/C	1B	583216483	+	T	T	T	T	T	T	T	T	T	T	T	T	T	T	T	T	T	T	T	T	T	C	T	T	T	T	T	C	T	T	T	T	T	T	T	T	T	T	T	T	T	T	C	T	T
S1B_583216495	G/T	1B	583216495	+	G	G	G	G	G	G	G	G	G	G	G	G	G	G	G	G	G	G	G	G	G	T	G	G	G	G	G	T	G	G	G	G	G	G	G	G	G	G	G	G	G	G	T	G	G
S1B_583226871	A/C	1B	583226871	+	A	C	A	A	C	A	A	A	C	M	A	C	A	C	A	A	C	C	C	C	C	C	A	A	A	C	A	C	A	A	A	A	A	A	A	A	A	A	A	A	A	A	C	A	A
S1B_584070786	G/C	1B	584070786	+	G	G	G	G	G	G	G	G	G	S	G	G	G	G	G	G	G	G	G	G	G	C	G	G	G	G	G	C	G	G	G	G	G	G	G	G	G	G	G	G	G	G	C	G	G
S1B_584071575	G/T	1B	584071575	+	G	G	G	G	G	G	G	G	G	K	G	G	G	G	G	G	G	G	G	G	G	T	G	G	G	G	G	T	G	G	G	G	G	G	G	G	G	G	G	G	G	G	T	G	G
S1B_584071797	C/G	1B	584071797	+	C	C	C	C	C	C	C	C	C	S	C	C	C	C	C	C	C	C	C	C	C	G	C	C	C	C	C	G	C	C	C	C	C	C	C	C	C	C	C	C	C	C	G	C	C
S1B_584220421	C/T	1B	584220421	+	C	C	C	C	C	C	C	C	C	C	C	C	C	C	C	C	C	C	C	C	C	Y	C	C	C	C	C	T	C	C	C	C	C	C	C	C	C	C	C	C	C	C	T	C	C
S1B_584643459	A/G	1B	584643459	+	A	G	A	A	G	A	A	A	G	A	A	G	A	G	A	A	G	G	G	G	G	A	A	A	A	G	A	A	A	A	A	A	A	A	A	A	A	A	A	A	A	A	A	A	A
S1B_584643511	T/G	1B	584643511	+	T	T	T	T	T	T	T	T	T	T	T	T	T	T	T	T	T	T	T	T	T	G	T	T	T	T	T	G	T	T	T	T	T	T	T	T	T	T	T	T	T	T	G	T	T
S1B_584685308	T/C	1B	584685308	+	T	C	T	T	C	T	T	T	C	T	T	C	Y	C	T	T	C	C	C	C	C	T	T	T	T	C	T	T	T	T	T	T	T	T	T	T	T	T	T	T	T	T	T	T	T
S1B_584701407	A/G	1B	584701407	+	A	G	A	A	G	A	A	A	G	A	A	G	A	G	A	A	G	G	G	G	G	A	A	A	A	G	A	A	A	A	A	A	A	A	A	A	A	A	A	A	A	A	A	A	A
S1B_587475392	T/C	1B	587475392	+	T	T	T	T	T	T	T	T	T	T	T	T	T	T	Y	T	T	T	T	T	T	T	T	T	T	T	T	T	T	T	T	T	T	T	T	T	T	T	T	T	T	Y	T	T	T
S1B_588246513	A/G	1B	588246513	+	A	A	A	A	A	A	A	A	A	A	A	A	R	A	A	A	A	R	A	A	A	A	A	A	A	A	R	A	A	A	R	R	A	A	A	G	A	A	R	A	A	A	A	A	A
S1B_588246527	C/G	1B	588246527	+	C	C	C	C	G	C	C	C	C	S	C	C	S	C	C	C	C	S	G	C	C	C	C	C	C	C	S	G	C	C	S	S	C	C	C	G	C	C	S	C	C	C	G	C	C
S1B_589299847	C/G	1B	589299847	+	C	C	C	C	C	C	C	C	C	C	C	S	C	C	C	C	C	C	C	C	C	C	C	C	C	C	C	C	C	C	C	C	C	G	C	C	C	C	C	C	C	C	C	C	C
S1B_589299853	C/G	1B	589299853	+	C	C	C	C	C	C	G	C	C	C	C	C	C	C	C	C	S	S	C	G	C	C	C	C	C	C	C	C	C	C	G	C	C	C	C	C	G	C	C	C	C	C	C	C	C
S1B_589554059	G/A	1B	589554059	+	G	G	G	G	A	G	G	G	R	R	A	G	G	G	G	G	G	G	G	G	G	G	G	G	G	G	G	G	G	A	G	G	G	G	A	G	G	A	G	G	G	G	A	G	G
S1B_589554062	G/A	1B	589554062	+	G	G	G	G	A	G	G	G	R	R	A	G	G	G	G	G	G	G	G	G	G	G	G	G	G	G	G	G	G	A	G	G	G	G	A	G	G	A	G	G	G	G	A	G	G
S1B_589736887	G/T	1B	589736887	+	G	T	G	G	G	G	G	G	G	G	G	G	G	G	G	G	T	G	G	G	G	K	G	G	G	G	G	G	G	G	K	K	G	G	G	G	G	G	G	G	G	G	K	G	G
S1B_589749975	T/C	1B	589749975	+	T	T	T	T	T	T	T	T	T	T	T	T	C	T	T	T	T	Y	T	T	T	T	T	T	T	T	Y	T	T	T	C	Y	T	T	T	T	T	T	T	T	T	T	T	T	T
S1B_589749992	G/A	1B	589749992	+	G	G	G	G	G	G	G	G	G	G	G	G	A	G	G	G	G	R	G	G	G	G	G	G	G	G	R	G	G	G	A	R	G	G	G	G	G	G	G	G	G	G	G	G	G
S1B_589750001	G/T	1B	589750001	+	G	G	G	G	G	G	G	G	G	G	G	G	T	G	G	G	G	K	G	G	G	G	G	G	G	G	K	G	G	G	T	K	G	G	G	G	G	G	G	G	G	G	G	G	G
S1B_589942507	G/T	1B	589942507	+	G	T	G	T	G	G	G	G	G	G	G	T	G	T	G	G	T	T	G	T	T	G	G	G	G	T	G	G	G	G	G	G	G	G	G	G	G	G	G	G	G	G	G	G	G
S1B_590244791	T/G	1B	590244791	+	T	G	T	T	G	T	T	T	T	T	T	G	T	G	T	T	G	G	T	G	G	T	T	T	T	G	T	T	T	T	T	T	T	T	T	T	T	T	T	T	T	T	T	T	T
S1B_590585316	C/T	1B	590585316	+	C	C	C	C	C	C	C	Y	C	T	C	Y	C	C	C	C	C	C	C	C	C	C	C	C	C	C	C	C	C	C	C	C	C	C	C	C	C	C	C	Y	C	C	C	C	Y
S1B_590585327	C/G	1B	590585327	+	G	C	C	C	C	C	C	C	C	C	C	C	C	C	C	C	C	C	C	C	C	C	C	C	C	C	C	C	C	G	C	C	C	S	C	C	C	S	C	S	S	C	C	C	C
S1B_590585331	A/T	1B	590585331	+	A	A	A	A	A	W	A	A	A	A	A	W	W	A	A	A	A	A	A	A	A	W	T	A	A	A	A	A	A	A	A	A	A	A	A	A	A	A	A	A	A	A	T	A	A
S1B_590585336	T/C	1B	590585336	+	C	T	T	T	T	T	T	T	T	T	T	T	T	T	T	T	T	T	T	T	T	T	T	T	T	T	T	T	T	C	T	T	T	Y	T	T	T	Y	T	Y	Y	T	T	T	T
S1B_590636044	T/A	1B	590636044	+	W	T	T	W	T	T	T	T	T	W	W	T	T	T	T	W	T	T	T	T	T	T	T	T	T	T	T	W	T	T	T	W	T	T	T	T	T	T	T	W	T	T	T	W	T
S1B_590636045	A/T	1B	590636045	+	A	A	W	A	A	W	A	A	A	A	A	W	A	W	A	A	A	A	A	W	A	W	A	A	A	A	A	W	A	A	A	A	A	A	A	A	A	A	A	A	A	A	A	A	A
S1B_590636055	G/A	1B	590636055	+	G	G	G	G	G	G	G	G	G	G	G	G	G	G	R	G	G	G	G	G	G	G	G	G	G	G	G	G	G	G	G	R	G	G	A	G	G	G	G	G	R	G	G	G	G
S1B_590636063	T/C	1B	590636063	+	T	T	T	T	T	T	T	T	T	Y	T	Y	T	Y	T	Y	T	Y	C	T	T	T	T	T	Y	C	Y	T	T	T	T	T	T	T	T	Y	Y	T	T	T	T	T	T	T	T
S1B_590636066	C/T	1B	590636066	+	C	C	C	C	C	C	C	C	C	C	C	C	C	C	C	C	C	C	C	Y	C	C	C	Y	C	C	C	C	C	C	C	C	C	C	C	C	C	C	C	C	Y	C	C	C	C
S1B_590636071	A/T	1B	590636071	+	A	A	A	A	A	W	W	A	A	A	A	A	A	A	A	A	A	A	A	A	A	A	A	A	A	A	W	A	A	A	A	W	A	A	A	A	A	W	A	A	A	A	A	W	A
S1B_590790868	G/C	1B	590790868	+	G	C	G	G	G	G	G	G	C	S	G	C	G	C	G	G	C	C	G	C	C	G	G	G	G	C	G	G	G	G	G	G	G	G	G	G	G	G	G	G	G	G	C	G	G
S1B_590885560	T/G	1B	590885560	+	T	G	T	T	T	T	T	T	T	T	T	G	T	G	T	T	G	G	T	G	G	G	T	T	T	G	T	G	T	T	T	T	T	T	T	T	T	T	T	T	T	T	T	T	T
S1B_590886928	A/G	1B	590886928	+	A	A	A	A	A	A	A	A	A	A	G	A	A	A	A	A	A	A	A	A	A	A	A	A	A	A	A	A	A	G	A	A	A	A	G	A	A	G	A	A	A	A	A	A	A
S1B_590886987	G/A	1B	590886987	+	G	G	G	G	G	G	G	G	G	G	A	G	G	G	G	G	G	G	G	G	G	G	G	G	G	G	G	G	G	A	G	G	G	G	A	G	G	A	G	G	G	G	G	G	G
S1B_591187732	G/C	1B	591187732	+	G	G	G	S	G	G	G	G	G	G	C	G	G	G	G	G	G	G	G	G	G	G	G	G	G	G	G	G	G	C	G	G	G	G	C	G	G	C	G	G	G	G	G	G	G
S1B_591806415	G/A	1B	591806415	+	G	G	G	A	A	G	G	G	A	A	A	G	A	G	G	G	G	G	A	G	G	A	G	G	G	G	G	A	G	A	G	G	G	G	A	G	G	A	G	G	G	G	A	G	G
S1B_592095652	A/G	1B	592095652	+	A	A	A	A	A	A	A	A	A	A	A	A	A	A	A	A	A	R	A	A	A	A	R	A	A	A	R	A	A	A	R	R	A	A	A	A	R	A	A	A	A	A	A	A	A
S1B_592345399	C/G	1B	592345399	+	S	C	C	G	C	C	C	C	C	C	C	C	G	C	C	C	C	C	G	C	C	C	C	C	C	C	C	C	C	C	C	C	C	C	C	C	C	C	C	C	C	C	C	C	C
S1B_592345736	G/A	1B	592345736	+	G	G	G	A	A	G	G	G	G	G	A	G	A	G	G	G	G	G	A	G	G	G	G	G	G	G	G	G	G	A	G	G	G	G	A	G	G	A	G	G	G	G	G	G	G
S1B_592554088	G/A	1B	592554088	+	G	G	G	A	G	G	G	G	G	G	G	G	A	G	G	G	G	G	A	G	G	G	G	G	G	G	G	G	G	G	G	G	G	G	G	G	G	G	G	G	G	G	G	G	G
S1B_592554113	G/A	1B	592554113	+	G	G	G	A	G	G	G	G	G	G	G	G	A	G	G	G	G	G	A	G	G	G	G	G	G	G	G	G	G	G	G	G	G	G	G	G	G	G	G	G	G	G	G	G	G
S1B_592554126	A/G	1B	592554126	+	A	G	A	G	G	G	A	A	G	G	G	G	G	G	A	A	G	G	G	G	G	G	A	A	A	G	A	G	A	G	A	A	A	A	G	A	A	G	A	A	G	A	G	A	A
S1B_592826381	A/G	1B	592826381	+	A	R	A	G	A	R	R	G	A	G	G	A	R	A	G	A	A	A	G	A	A	G	A	A	R	A	A	G	G	G	G	R	A	R	G	G	G	G	A	A	A	R	G	G	A
S1B_592826399	C/T	1B	592826399	+	C	Y	C	T	C	Y	Y	T	C	T	T	C	Y	C	T	C	C	C	T	C	C	T	C	C	Y	C	C	T	T	T	T	Y	C	Y	T	T	T	T	C	C	C	Y	T	T	C
S1B_592826402	C/T	1B	592826402	+	C	Y	C	T	C	Y	Y	T	C	T	T	C	Y	C	T	C	C	C	T	C	C	T	C	C	Y	C	C	T	T	T	T	Y	C	Y	T	T	T	T	C	C	C	Y	T	T	C
S1B_593992386	C/T	1B	593992386	+	C	T	C	C	T	T	C	C	C	C	C	T	C	T	C	C	T	T	C	T	T	T	C	C	C	T	C	T	C	C	C	C	C	C	C	C	C	C	C	C	C	C	C	C	C
S1B_594019513	A/G	1B	594019513	+	A	G	A	A	G	G	A	A	G	G	A	G	A	R	A	A	G	G	A	G	G	G	G	G	G	G	A	G	A	A	A	A	A	A	A	A	A	A	A	A	A	A	G	A	A
S1B_594474042	T/C	1B	594474042	+	T	C	T	T	C	C	T	T	T	T	T	C	T	C	T	T	C	C	T	C	C	C	T	T	T	C	T	C	T	T	T	T	T	T	T	T	T	T	T	T	T	T	T	T	T
S1B_594474045	G/A	1B	594474045	+	G	A	G	G	A	A	G	G	G	G	G	A	G	A	G	G	A	A	G	A	A	A	G	G	G	A	G	A	G	G	G	G	G	G	G	G	G	G	G	G	G	G	G	G	G
S1B_594486967	A/G	1B	594486967	+	A	G	A	A	G	G	A	A	G	R	A	G	A	G	A	A	G	G	A	G	G	G	G	G	G	G	A	G	A	A	A	A	A	A	A	A	A	A	A	A	A	A	G	A	A
S1B_595137308	G/A	1B	595137308	+	G	A	G	G	A	A	G	G	A	G	G	A	G	A	G	G	A	A	G	A	A	A	A	A	A	A	G	A	G	G	G	G	G	G	G	G	G	G	G	G	G	G	G	G	G
S1B_595746148	G/A	1B	595746148	+	G	G	G	G	A	G	G	G	A	R	G	G	G	G	G	G	G	G	G	G	G	G	A	A	A	G	G	G	G	G	G	G	G	G	G	G	G	G	G	G	G	G	A	G	G
S1B_595746155	T/G	1B	595746155	+	T	T	T	T	G	T	T	T	G	K	T	T	T	T	T	T	T	T	T	T	T	T	G	G	G	T	T	T	T	T	T	T	T	T	T	T	T	T	T	T	T	T	G	T	T
S1B_596869216	C/A	1B	596869216	+	C	C	C	C	C	C	C	C	C	C	C	C	C	C	C	C	C	C	C	C	C	C	A	A	A	C	C	C	C	C	C	C	C	C	C	C	C	C	C	C	C	C	C	C	C
S1B_597759608	C/A	1B	597759608	+	C	C	M	C	C	C	C	C	C	C	C	C	C	C	M	M	C	C	C	C	C	C	C	M	M	C	C	M	C	C	C	C	C	C	C	C	C	C	C	C	M	C	C	C	C
S1B_597759634	A/G	1B	597759634	+	A	A	R	A	A	A	A	A	A	A	A	A	A	A	R	R	A	A	A	A	A	A	A	R	R	A	A	R	A	A	A	A	A	A	A	A	A	A	A	A	R	A	A	A	A
S1B_598188102	G/A	1B	598188102	+	G	G	G	G	A	G	G	G	G	G	G	G	G	G	G	G	G	G	G	G	G	G	G	G	G	G	G	G	G	G	G	G	G	G	G	G	G	G	G	G	G	G	G	G	G
S1B_598188117	G/T	1B	598188117	+	G	T	G	T	G	G	G	G	G	G	T	T	G	T	G	G	T	T	T	T	T	T	G	G	G	T	G	T	G	T	G	G	T	G	T	T	G	T	G	T	G	T	G	T	G
S1B_598188750	G/T	1B	598188750	+	G	G	T	G	G	G	T	T	T	G	G	G	T	G	T	T	G	G	G	G	G	G	T	T	T	G	T	G	T	G	T	T	G	T	G	G	T	G	T	G	T	G	G	G	T
S1B_598188765	T/C	1B	598188765	+	T	T	T	T	C	T	T	T	C	C	T	T	T	T	T	T	T	T	T	T	T	T	T	T	T	T	T	T	T	T	T	T	T	T	T	T	T	T	T	T	T	T	C	T	T
S1B_598324004	A/G	1B	598324004	+	A	A	A	A	A	A	A	A	A	G	A	A	A	A	A	A	A	A	A	A	A	A	A	A	A	A	A	A	A	A	R	G	A	G	A	A	R	A	G	A	R	A	G	A	R
S1B_598324015	G/A	1B	598324015	+	G	G	G	G	G	G	G	G	G	R	G	G	G	G	G	G	G	G	G	G	G	G	G	G	G	G	G	G	G	G	R	A	G	A	G	G	R	G	A	G	R	G	G	G	R
S1B_598327694	G/A	1B	598327694	+	G	G	G	G	A	G	G	G	A	G	G	G	G	G	G	G	G	G	G	G	G	G	G	G	G	G	G	G	G	G	G	G	G	G	G	G	G	G	G	G	G	G	A	G	G
S1B_599461192	C/T	1B	599461192	+	C	C	C	C	T	C	C	C	T	C	C	C	C	C	C	C	C	C	C	C	C	C	C	C	C	C	C	C	C	C	C	C	C	C	C	C	C	C	C	C	C	C	C	C	C
S1B_599527956	C/T	1B	599527956	+	T	Y	C	C	C	T	C	C	C	C	C	C	C	C	T	T	C	C	C	C	C	C	C	C	C	C	C	C	C	C	C	C	T	C	C	T	C	C	C	T	C	Y	C	C	C
S1B_599940338	A/C	1B	599940338	+	A	C	A	A	A	C	A	A	C	M	A	C	A	C	A	A	C	C	A	C	C	C	C	C	C	C	A	C	A	A	A	A	A	A	A	A	A	A	A	A	A	A	C	A	A
S1B_599946140	G/A	1B	599946140	+	G	A	G	G	G	A	G	G	G	G	G	A	G	A	G	G	A	A	G	A	R	A	G	G	G	A	G	A	G	G	G	G	G	G	G	G	G	G	G	G	G	G	G	G	G
S1B_599946145	T/C	1B	599946145	+	T	C	T	T	T	C	T	T	T	T	T	C	T	C	T	T	C	C	T	C	Y	C	T	T	T	C	T	C	T	T	T	T	T	T	T	T	T	T	T	T	T	T	T	T	T
S1B_600072228	G/A	1B	600072228	+	G	A	G	G	G	A	G	G	G	G	G	A	G	A	G	G	A	A	G	A	A	A	A	A	A	A	G	A	G	G	G	G	G	G	G	G	G	G	G	G	G	G	G	G	G
S1B_600104723	C/T	1B	600104723	+	C	C	C	Y	C	C	C	C	C	Y	C	C	Y	C	Y	Y	C	C	C	C	C	C	C	C	C	C	C	C	C	C	C	C	C	C	Y	C	C	Y	C	C	C	C	Y	C	C
S1B_600140879	G/T	1B	600140879	+	G	G	G	G	G	G	G	G	G	G	G	G	G	G	G	G	G	G	G	G	G	G	T	T	T	G	G	G	G	G	G	G	G	G	G	G	G	G	G	G	G	G	T	G	G
S1B_600140981	C/G	1B	600140981	+	C	G	C	C	C	G	C	C	G	G	C	G	C	G	C	C	G	G	C	G	G	G	G	G	G	G	C	G	C	C	C	C	C	C	C	C	C	C	C	C	C	C	G	C	C
S1B_600227442	A/G	1B	600227442	+	A	G	A	A	A	G	A	A	G	R	A	G	A	G	A	A	G	G	A	G	G	G	G	G	G	G	A	G	A	A	A	A	A	A	A	A	A	A	A	A	A	A	G	A	A
S1B_600905060	G/A	1B	600905060	+	G	G	G	G	G	G	G	G	G	R	G	G	G	G	G	G	G	G	G	G	G	G	A	A	A	G	G	G	G	G	G	G	G	G	G	G	G	G	G	G	G	G	A	G	G
S1B_600905061	T/C	1B	600905061	+	T	T	T	T	T	T	T	T	C	Y	T	T	T	T	T	T	T	T	T	T	T	T	C	C	C	T	T	T	T	T	T	T	T	T	T	T	T	T	T	T	T	T	C	T	T
S1B_601899345	A/C	1B	601899345	+	C	C	C	A	A	A	C	C	C	A	A	C	A	C	A	A	C	C	A	C	C	A	C	C	C	C	A	A	A	A	A	A	C	A	A	C	A	A	A	C	A	C	A	C	A
S1B_601899376	A/G	1B	601899376	+	G	G	G	A	A	A	G	G	G	A	A	G	A	G	A	A	G	G	A	G	G	A	G	G	G	G	A	A	A	A	A	A	G	A	A	G	A	A	A	G	A	G	A	G	A
S1B_602038658	G/A	1B	602038658	+	A	A	A	G	A	G	A	A	A	A	G	A	A	A	A	A	A	A	G	A	A	G	A	A	A	A	A	G	A	G	G	G	A	G	G	A	G	G	G	A	G	A	A	A	G
S1B_602097867	G/A	1B	602097867	+	A	A	A	G	A	G	A	A	A	A	G	A	A	A	A	A	A	A	G	A	A	G	A	A	A	A	A	G	A	G	G	G	A	G	G	A	G	G	G	A	G	A	A	A	G
S1B_602097912	T/A	1B	602097912	+	A	A	A	T	A	T	A	A	A	A	T	A	A	A	A	A	A	A	T	A	A	T	A	A	A	A	A	T	A	T	T	T	A	T	T	A	T	T	T	A	T	A	A	A	T
S1B_602248783	G/C	1B	602248783	+	C	C	C	G	C	G	C	C	C	S	G	C	C	C	C	C	C	C	G	C	C	G	C	C	C	C	C	G	C	G	G	G	C	G	G	C	G	G	G	C	G	C	G	C	G
S1B_602551195	G/A	1B	602551195	+	G	G	G	G	R	G	G	G	G	G	G	G	R	G	G	G	R	G	G	G	G	G	G	R	G	G	G	G	G	R	G	G	R	A	G	G	G	R	G	G	R	R	G	G	G
S1B_602752264	C/G	1B	602752264	+	C	C	C	C	C	S	C	C	C	C	C	C	C	C	C	C	C	C	C	C	C	C	C	C	C	C	S	C	C	C	C	C	C	C	C	C	S	C	C	C	C	C	C	C	C
S1B_603322068	C/A	1B	603322068	+	A	A	A	C	A	C	A	A	A	A	C	A	A	A	A	A	A	A	C	A	A	C	A	A	A	A	A	C	A	C	C	C	A	C	C	A	C	C	C	A	C	A	A	A	C
S1B_604122761	T/C	1B	604122761	+	T	T	T	T	T	T	T	T	C	T	T	T	Y	Y	T	T	Y	Y	T	T	Y	T	Y	T	T	T	T	T	T	T	T	T	T	Y	T	T	T	T	T	T	Y	T	T	T	Y
S1B_604122785	T/A	1B	604122785	+	T	T	T	T	T	T	T	T	A	T	T	T	W	W	T	T	W	W	T	T	W	T	W	T	T	T	T	T	T	T	T	T	T	W	T	T	T	T	T	T	W	T	T	T	W
S1B_604122787	T/A	1B	604122787	+	T	T	T	T	T	T	T	T	A	T	T	T	W	W	T	T	W	W	T	T	W	T	W	T	T	T	T	T	T	T	T	T	T	W	T	T	T	T	T	T	W	T	T	T	W
S1B_604124956	G/C	1B	604124956	+	C	C	C	G	C	G	C	C	C	C	G	C	C	C	C	C	C	C	G	C	C	G	C	C	C	C	C	G	C	G	G	G	C	G	G	C	G	G	G	C	G	C	C	C	G
S1B_604158962	C/T	1B	604158962	+	T	T	T	C	C	C	T	T	C	C	C	T	C	T	C	C	T	T	C	T	T	C	T	T	T	T	C	C	C	C	C	C	T	C	C	Y	C	C	C	T	C	T	C	T	C
S1B_604602276	A/G	1B	604602276	+	G	G	G	A	G	A	G	G	G	G	A	G	G	G	G	G	G	G	A	G	G	A	G	G	G	G	G	A	G	A	A	A	G	A	A	G	A	A	A	G	A	G	G	G	A
S1B_604721472	T/A	1B	604721472	+	T	T	T	W	T	T	T	T	T	T	T	T	T	T	T	T	T	T	W	T	T	T	T	T	T	W	T	T	T	W	T	T	T	T	T	T	T	W	T	T	T	T	T	T	W
S1B_604721474	T/A	1B	604721474	+	T	T	T	T	T	T	T	T	T	T	T	T	T	T	T	T	T	T	T	T	T	T	T	T	T	T	T	T	T	T	T	W	T	T	T	T	T	T	W	W	W	T	T	T	W
S1B_604721566	G/A	1B	604721566	+	A	A	A	G	A	G	A	A	A	A	G	A	A	A	A	A	A	A	G	A	A	G	A	A	A	A	A	G	A	G	G	G	A	G	G	A	G	G	G	A	G	A	A	A	G
S1B_604721589	A/G	1B	604721589	+	G	G	G	A	G	A	G	G	G	G	A	G	G	G	G	G	G	G	A	G	G	A	G	G	G	G	G	A	G	A	A	A	G	A	A	G	A	A	A	G	A	G	G	G	A
S1B_604859539	T/C	1B	604859539	+	C	C	C	T	C	T	C	C	C	C	T	C	C	C	C	C	C	C	T	C	C	T	C	C	C	C	C	T	C	T	T	T	C	T	T	C	T	T	T	C	T	C	C	C	T
S1B_607150826	C/T	1B	607150826	+	T	T	T	C	T	C	T	T	T	T	C	T	T	T	T	T	T	T	C	T	T	C	T	T	T	T	T	C	T	C	C	C	T	C	C	T	C	C	C	T	C	T	T	T	C
S1B_607385668	G/A	1B	607385668	+	A	A	A	G	A	G	A	A	A	A	G	A	A	A	A	A	A	A	G	A	A	G	A	A	A	A	A	G	A	G	G	G	A	G	G	A	G	G	G	A	G	A	A	A	G
S1B_607393980	C/A	1B	607393980	+	A	A	A	C	A	C	A	A	A	A	C	A	A	A	A	A	A	A	C	A	A	C	A	A	A	A	A	C	A	C	C	C	A	C	C	A	C	C	C	A	C	A	A	A	C
S1B_607479559	C/T	1B	607479559	+	C	C	Y	C	C	C	C	C	C	Y	C	C	C	C	C	C	C	C	C	C	C	C	C	T	C	C	T	C	C	C	C	C	C	T	C	C	C	C	C	C	C	Y	C	C	C
S1B_607479581	C/A	1B	607479581	+	C	C	M	C	C	C	C	C	C	M	C	C	C	C	C	C	C	C	C	C	C	C	C	A	C	C	A	C	C	C	C	C	C	A	C	C	C	C	C	C	C	M	C	C	C
S1B_607479599	A/G	1B	607479599	+	A	A	A	A	A	A	A	A	A	A	A	A	A	A	A	A	A	A	A	R	A	A	R	A	R	A	A	A	A	A	A	A	A	A	A	A	A	R	A	A	R	A	A	A	A
S1B_607503728	A/G	1B	607503728	+	G	G	G	A	G	A	G	G	G	G	A	G	G	G	G	G	G	G	A	G	G	A	G	G	G	G	G	A	G	A	A	A	G	A	A	G	A	A	A	G	A	G	G	G	A
S1B_608055604	T/C	1B	608055604	+	T	T	T	T	C	T	T	T	C	C	T	T	C	T	C	C	T	T	T	T	T	T	T	T	T	T	C	T	C	T	T	T	T	T	T	T	T	T	T	T	T	T	C	T	T
S1B_608301287	G/A	1B	608301287	+	G	G	G	G	A	G	G	G	A	A	G	G	A	G	A	A	G	G	G	G	G	G	G	G	G	G	A	G	A	G	G	G	G	G	G	G	G	G	G	G	G	G	A	G	G
S1B_608301289	G/C	1B	608301289	+	G	G	G	G	C	G	G	G	C	C	G	G	C	G	C	C	G	G	G	G	G	G	G	G	G	G	C	G	C	G	G	G	G	G	G	G	G	G	G	G	G	G	C	G	G
S1B_608369303	C/T	1B	608369303	+	C	C	C	C	C	C	C	C	Y	C	C	C	C	C	C	C	C	C	C	C	C	T	C	C	C	C	C	Y	C	C	C	C	C	C	C	C	C	C	C	C	C	C	C	C	C
S1B_608441928	C/T	1B	608441928	+	C	C	C	C	C	C	C	C	C	C	C	C	C	C	C	C	C	C	C	C	T	C	Y	C	C	C	C	C	C	T	C	C	C	C	C	C	C	C	Y	C	C	C	C	C	C
S1B_608441934	G/A	1B	608441934	+	G	G	G	G	G	G	G	G	G	G	R	G	G	G	G	G	G	G	R	G	G	G	G	G	G	G	G	G	G	G	G	G	G	G	G	G	G	R	G	G	G	R	R	R	G
S1B_608441947	G/A	1B	608441947	+	G	G	G	G	G	G	G	G	G	G	R	G	G	G	G	G	G	G	R	G	G	G	G	G	G	G	G	G	G	G	G	G	G	G	G	G	G	R	G	G	G	R	R	R	G
S1B_609423986	T/C	1B	609423986	+	T	T	T	T	C	T	T	T	C	C	T	T	C	T	C	C	T	T	T	T	T	T	T	T	T	T	C	T	C	T	T	T	T	T	T	T	T	T	T	T	T	T	C	T	T
S1B_609452564	G/A	1B	609452564	+	G	G	G	G	A	G	G	G	A	A	G	G	A	G	A	A	G	G	G	G	G	G	G	G	G	G	A	G	A	G	G	G	G	G	G	G	G	G	G	G	G	G	A	G	G
S1B_609456426	A/C	1B	609456426	+	A	A	A	A	C	A	A	A	C	A	A	A	C	A	C	C	A	A	A	A	A	A	A	A	A	A	C	A	C	A	A	A	A	A	A	A	A	A	A	A	A	A	C	A	A
S1B_609457548	C/T	1B	609457548	+	C	C	C	C	T	C	C	C	T	T	C	C	T	C	T	T	C	C	C	C	C	C	C	C	C	C	T	C	T	C	C	C	C	C	C	C	C	C	C	C	C	C	T	C	C
S1B_609711788	C/T	1B	609711788	+	C	C	C	C	T	C	C	C	C	Y	C	C	T	C	T	T	C	C	C	C	C	C	C	C	C	C	T	C	T	C	C	C	C	C	C	C	C	C	C	C	C	C	C	C	C
S1B_610538454	C/G	1B	610538454	+	C	C	C	C	G	C	C	C	C	C	C	C	C	C	C	C	C	C	C	C	C	C	C	C	C	C	C	C	C	C	C	C	C	C	C	C	C	C	C	C	C	C	C	C	C
S1B_610665641	G/C	1B	610665641	+	G	G	G	G	C	G	G	G	G	G	G	G	G	G	G	G	G	G	G	G	G	G	G	G	G	G	G	G	G	G	G	G	G	G	G	G	G	G	G	G	G	G	G	G	G
S1B_610668949	T/G	1B	610668949	+	T	T	T	T	G	T	T	T	T	T	T	T	T	T	T	T	T	T	T	T	T	T	T	T	T	T	T	T	T	T	T	T	T	T	T	T	T	T	T	T	T	T	T	T	T
S1B_611173542	C/T	1B	611173542	+	C	C	C	C	T	C	C	C	C	C	C	C	C	C	C	C	C	C	C	C	C	C	C	C	C	C	C	C	C	C	C	C	C	C	C	C	C	C	C	C	C	C	C	C	C
S1B_611300021	G/C	1B	611300021	+	G	G	G	G	G	G	G	G	G	S	G	G	C	G	C	C	G	G	G	G	G	G	G	G	G	G	C	G	C	G	G	G	G	G	G	G	G	G	G	G	G	G	G	G	G
S1B_611366549	C/T	1B	611366549	+	Y	C	C	C	C	Y	Y	Y	C	C	C	C	C	Y	C	C	T	T	C	Y	C	C	C	C	C	Y	C	C	C	C	C	C	C	C	C	Y	C	C	C	C	C	Y	C	Y	C
S1B_611366570	T/C	1B	611366570	+	Y	T	T	T	T	Y	Y	Y	T	T	T	T	T	Y	T	T	C	C	T	Y	T	T	T	T	T	Y	T	T	T	T	T	T	T	T	T	Y	T	T	T	Y	T	Y	T	Y	T
S1B_611471807	G/A	1B	611471807	+	G	G	G	G	A	G	G	G	G	G	G	G	G	G	G	G	G	G	G	G	G	G	G	G	G	G	G	G	G	G	G	G	G	G	G	G	G	G	G	G	G	G	G	G	G
S1B_611981753	C/T	1B	611981753	+	C	C	C	C	T	C	C	C	C	C	C	C	C	C	C	C	C	C	C	C	C	C	C	C	C	C	C	C	C	C	C	C	C	C	C	C	C	C	C	C	C	C	C	C	C
S1B_612395833	A/G	1B	612395833	+	A	A	A	A	G	A	A	A	A	A	A	A	A	A	A	A	A	A	A	A	A	A	A	A	A	A	A	A	A	A	A	A	A	A	A	A	A	A	A	A	A	A	A	A	A
S1B_612395848	G/A	1B	612395848	+	G	G	G	G	A	G	G	G	G	G	G	G	G	G	G	G	G	G	G	G	G	G	G	G	G	G	G	G	G	G	G	G	G	G	G	G	G	G	G	G	G	G	G	G	G
S1B_613067372	A/C	1B	613067372	+	A	A	A	A	C	A	A	A	A	A	A	A	A	A	A	A	A	A	A	A	A	A	A	A	A	A	A	A	A	A	A	A	A	A	A	A	A	A	A	A	A	A	A	A	A
S1B_613628428	A/C	1B	613628428	+	A	A	A	A	C	C	A	A	C	C	A	A	C	A	C	C	A	A	A	A	A	A	A	A	A	A	C	A	C	A	A	A	A	A	A	A	A	A	A	A	A	A	C	A	A
S1B_613696764	G/A	1B	613696764	+	G	G	G	G	A	A	G	G	A	A	G	G	R	G	A	A	G	G	G	G	G	G	G	G	G	G	A	G	A	G	G	G	G	G	G	G	G	G	G	G	G	G	A	G	G
S1B_613768344	A/G	1B	613768344	+	A	R	A	A	G	G	A	A	G	G	A	A	G	A	G	G	A	A	A	A	A	A	A	A	A	A	G	A	G	A	A	A	A	A	A	A	A	A	A	A	A	A	G	A	A
S1B_613768346	G/T	1B	613768346	+	G	K	G	G	T	T	G	G	T	T	G	G	T	G	T	T	G	G	G	G	G	G	G	G	G	G	T	G	T	G	G	G	G	G	G	G	G	G	G	G	G	G	T	G	G
S1B_613768348	G/A	1B	613768348	+	G	R	G	G	A	A	G	G	A	A	G	G	A	G	A	A	G	G	G	G	G	G	G	G	G	G	A	G	A	G	G	G	G	G	G	G	G	G	G	G	G	G	A	G	G
S1B_613812755	A/G	1B	613812755	+	A	A	A	A	G	G	A	A	G	G	A	A	G	A	G	G	A	A	A	A	A	A	A	A	A	A	G	A	G	A	A	A	A	A	A	A	A	A	A	A	A	A	G	A	A
S1B_613821652	G/T	1B	613821652	+	G	G	G	G	T	T	G	G	T	T	G	G	T	G	T	T	G	G	G	G	G	G	G	G	G	G	T	G	T	G	G	G	G	G	G	G	G	G	G	G	G	G	T	G	G
S1B_613828199	T/G	1B	613828199	+	T	T	T	T	G	G	T	T	G	G	T	T	G	T	G	G	T	T	T	T	T	T	T	T	T	T	G	T	G	T	T	T	T	T	T	T	T	T	T	T	T	T	G	T	T
S1B_615344602	T/C	1B	615344602	+	T	T	T	T	C	C	T	T	C	C	T	T	C	T	C	C	T	T	T	T	T	T	T	T	T	T	C	T	C	T	T	T	T	T	T	T	T	T	T	T	T	T	C	T	T
S1B_615344655	C/T	1B	615344655	+	C	C	C	C	T	T	C	C	T	T	C	C	T	C	T	T	C	C	C	C	C	C	C	C	C	C	T	C	T	C	C	C	C	C	C	C	C	C	C	C	C	C	T	C	C
S1B_615459756	C/G	1B	615459756	+	C	C	C	C	G	G	C	C	G	G	C	C	G	C	G	G	C	C	C	C	C	C	C	C	C	C	G	C	G	C	C	C	C	C	C	C	C	C	C	C	C	C	G	C	C
S1B_617270154	C/T	1B	617270154	+	C	C	C	C	C	C	C	C	C	C	C	C	T	C	T	T	C	C	C	C	C	C	C	C	C	C	T	C	Y	C	C	C	C	C	C	C	C	C	C	C	C	C	C	C	C
S1B_617270167	T/C	1B	617270167	+	T	T	T	T	T	T	T	T	T	T	T	T	C	T	C	C	T	T	T	T	T	T	T	T	T	T	C	T	Y	T	T	T	T	T	T	T	T	T	T	T	T	T	T	T	T
S1B_618005922	T/C	1B	618005922	+	T	Y	T	T	T	T	C	T	T	T	T	T	Y	T	T	T	T	Y	Y	T	T	T	T	Y	T	T	Y	T	T	T	Y	T	T	T	T	C	T	T	C	T	T	T	T	T	T
S1B_618809690	T/C	1B	618809690	+	T	T	T	T	T	T	T	T	T	Y	T	T	C	T	C	C	T	T	T	T	T	T	T	T	T	T	C	T	C	T	T	T	T	T	T	T	T	T	T	T	T	T	T	T	T
S1B_619294713	G/A	1B	619294713	+	G	G	G	G	G	G	G	G	G	G	G	G	A	G	A	A	G	G	G	G	G	G	G	G	G	G	A	G	A	G	G	G	G	G	G	G	G	G	G	G	G	G	G	G	G
S1B_619963161	A/G	1B	619963161	+	A	A	A	A	G	G	A	A	G	A	A	A	A	A	A	A	A	A	A	A	A	A	A	A	A	R	A	A	A	A	A	A	A	A	A	A	A	A	A	A	A	A	A	A	A
S1B_620412664	C/A	1B	620412664	+	C	C	C	C	A	A	C	C	A	A	C	C	C	C	A	A	C	C	C	C	C	C	C	C	C	C	A	C	A	C	C	C	C	C	C	C	C	C	C	C	C	C	A	C	C
S1B_620412665	C/T	1B	620412665	+	C	C	C	C	T	T	C	C	T	T	C	C	C	C	T	T	C	C	C	C	C	C	C	C	C	C	T	C	T	C	C	C	C	C	C	C	C	C	C	C	C	C	T	C	C
S1B_620512513	G/T	1B	620512513	+	T	T	T	T	G	G	G	T	T	G	T	T	T	T	G	G	T	T	T	T	G	T	T	T	T	T	G	T	G	T	G	G	T	G	G	T	G	T	G	T	G	T	T	T	G
S1B_621029129	C/A	1B	621029129	+	C	C	C	C	A	A	C	C	A	A	C	C	C	C	A	A	C	C	C	C	C	C	C	C	C	C	A	C	A	C	C	C	C	C	C	C	C	C	C	C	C	C	A	C	C
S1B_621031902	C/T	1B	621031902	+	C	C	C	C	C	C	C	C	C	C	T	C	C	C	C	C	C	C	C	C	C	C	C	C	C	C	C	C	C	T	C	C	C	C	T	C	C	T	C	C	C	C	C	C	C
S1B_621031928	G/T	1B	621031928	+	G	G	G	G	T	T	G	G	T	T	G	G	G	G	T	T	G	G	G	G	G	G	G	G	G	G	T	G	T	G	G	G	G	G	G	G	G	G	G	G	G	G	T	G	G
S1B_621031932	C/T	1B	621031932	+	C	C	C	C	T	T	C	C	T	T	C	C	C	C	T	T	C	C	C	C	C	C	C	C	C	C	T	C	T	C	C	C	C	C	C	C	C	C	C	C	C	C	T	C	C
S1B_621031947	C/T	1B	621031947	+	C	C	C	C	T	T	C	C	T	T	T	C	C	C	T	T	C	C	T	C	C	C	C	C	C	C	T	C	T	T	C	C	C	C	T	C	C	T	C	C	C	C	T	C	C
S1B_621483137	C/T	1B	621483137	+	C	C	C	C	T	T	C	C	T	T	C	C	C	C	T	T	C	C	C	C	C	C	C	C	C	C	T	C	T	C	C	C	C	C	C	C	C	C	C	C	C	C	T	C	C
S1B_621483261	G/C	1B	621483261	+	G	G	G	G	C	C	G	G	C	C	G	G	G	G	C	C	G	G	G	G	G	G	G	G	G	G	C	G	C	G	G	G	G	G	G	G	G	G	G	G	G	G	C	G	G
S1B_621546679	G/C	1B	621546679	+	G	G	G	G	G	G	G	G	G	G	G	G	S	G	G	G	G	S	G	G	G	G	G	G	G	G	G	G	G	G	S	S	G	G	G	C	G	G	S	G	G	G	G	G	G
S1B_621546692	T/C	1B	621546692	+	T	T	T	T	T	T	T	T	T	T	T	T	Y	T	T	T	T	Y	T	T	T	T	T	T	T	T	T	T	T	T	Y	Y	T	T	T	C	T	T	Y	T	T	T	T	T	T
S1B_621589832	C/G	1B	621589832	+	C	C	C	C	G	G	C	C	G	G	G	C	C	C	G	G	C	C	G	C	C	C	C	C	C	C	G	C	G	G	C	C	C	C	G	C	C	G	C	C	C	C	G	C	C
S1B_621589880	G/C	1B	621589880	+	G	G	G	G	G	G	G	G	G	G	C	G	G	G	G	G	G	G	C	G	G	G	G	G	G	G	G	G	G	C	G	G	G	G	C	G	G	C	G	G	G	G	G	G	G
S1B_622101062	A/G	1B	622101062	+	A	A	A	A	R	G	A	A	G	R	A	A	A	A	G	G	A	A	A	A	A	A	A	A	A	A	G	A	G	A	A	A	A	A	A	A	A	A	A	A	A	A	G	A	A
S1B_622101097	A/T	1B	622101097	+	A	A	A	A	T	T	A	A	T	T	A	A	A	A	T	T	A	A	A	A	A	A	A	A	A	A	T	A	T	A	A	A	A	A	A	A	A	A	A	A	A	A	T	A	A
S1B_622288639	C/T	1B	622288639	+	C	C	C	C	C	C	C	C	C	C	T	C	C	C	C	C	C	C	T	C	C	C	C	C	C	C	C	C	C	T	C	C	C	C	T	C	C	T	C	C	C	C	C	C	C
S1B_622537254	C/T	1B	622537254	+	C	C	C	C	C	C	C	C	C	C	C	C	C	C	C	C	C	C	C	C	C	C	C	C	C	C	C	C	C	C	C	C	C	C	C	C	Y	C	C	Y	C	C	C	Y	C
S1B_622691792	C/T	1B	622691792	+	C	C	C	C	T	T	C	C	T	T	C	C	C	C	T	T	C	C	C	C	C	C	C	C	C	C	T	C	T	C	C	C	C	C	C	C	C	C	C	C	C	C	T	C	C
S1B_622701006	A/T	1B	622701006	+	A	A	A	A	T	T	A	A	T	T	A	A	A	A	T	T	A	A	A	A	A	A	A	A	A	A	T	A	T	A	A	A	A	A	A	A	A	A	A	A	A	A	T	A	A
S1B_624709399	T/A	1B	624709399	+	T	T	T	T	T	T	T	T	A	T	A	T	T	T	T	T	T	T	T	T	T	T	T	T	T	T	T	T	T	W	T	T	T	T	W	T	T	W	T	T	T	T	T	T	T
S1B_625082318	C/T	1B	625082318	+	C	C	C	C	C	C	C	C	C	C	C	C	C	C	C	C	C	C	C	C	C	C	C	C	C	C	C	C	C	C	T	T	C	T	C	C	T	C	T	C	T	C	C	C	T
S1B_626098523	A/T	1B	626098523	+	A	A	A	A	A	A	A	A	W	A	A	A	A	A	A	A	A	A	A	A	W	A	A	A	A	A	A	A	A	A	A	A	W	A	W	A	W	W	A	A	A	A	A	A	A
S1B_626258766	T/A	1B	626258766	+	T	T	T	T	T	W	T	T	T	T	T	T	T	T	T	T	T	T	T	T	T	T	T	T	T	T	T	T	T	T	T	W	T	T	T	T	T	T	T	T	T	T	T	T	T
S1B_626258782	G/A	1B	626258782	+	G	G	G	G	G	G	G	G	R	G	R	G	G	G	G	G	G	G	G	G	G	G	G	G	G	G	G	G	G	R	G	R	R	G	R	G	R	G	G	G	G	G	G	R	G
S1B_628137485	C/T	1B	628137485	+	C	Y	C	C	T	Y	T	Y	Y	C	C	C	Y	T	Y	T	C	T	T	T	T	T	Y	Y	Y	Y	T	C	T	Y	C	C	C	C	C	C	C	Y	C	C	C	C	T	C	C
S1B_628137486	G/A	1B	628137486	+	G	R	G	G	A	R	A	R	R	G	G	G	R	A	R	A	G	A	A	A	A	A	R	R	R	R	A	G	A	R	G	G	G	G	G	G	G	R	G	G	G	G	A	G	G
S1B_628137487	C/T	1B	628137487	+	C	C	C	C	C	C	C	Y	C	C	Y	C	C	C	C	C	C	C	C	C	C	C	C	C	C	C	C	C	C	C	Y	T	C	C	C	C	Y	C	C	C	Y	C	C	C	C
S1B_628137493	C/T	1B	628137493	+	C	Y	C	C	C	C	C	C	Y	T	C	T	C	C	C	C	T	C	C	C	C	C	C	C	Y	Y	C	T	C	Y	C	C	C	T	Y	C	C	C	C	T	C	C	C	C	T
S1B_628320644	C/G	1B	628320644	+	C	C	S	G	C	C	C	C	C	C	C	C	C	C	C	C	C	C	C	C	C	C	C	C	C	C	C	C	C	C	C	C	C	C	C	C	C	C	C	C	C	C	C	C	C
S1B_630574011	C/T	1B	630574011	+	C	C	C	C	C	C	C	C	C	C	T	C	C	C	C	C	C	C	T	C	C	C	C	C	C	C	C	C	C	T	T	T	C	T	T	C	T	T	T	C	T	C	C	C	T
S1B_630606457	G/A	1B	630606457	+	G	G	G	G	G	G	G	G	G	G	A	G	G	G	G	G	G	G	A	G	G	G	G	G	G	G	G	G	G	A	A	A	G	A	A	G	A	A	A	G	A	G	G	G	A
S1B_630606497	A/G	1B	630606497	+	A	A	A	A	A	A	A	A	A	A	G	A	A	A	A	A	A	A	G	A	A	A	A	A	A	A	A	A	A	G	G	G	A	G	G	A	G	G	G	A	G	A	A	A	G
S1B_630869308	C/T	1B	630869308	+	C	C	C	C	C	C	C	C	C	C	T	C	C	C	C	C	C	C	T	C	C	C	C	C	C	C	C	C	C	T	T	T	C	T	T	C	T	T	T	C	T	C	C	C	T
S1B_630874079	G/A	1B	630874079	+	G	G	G	G	G	G	G	G	G	G	A	G	G	G	G	G	G	G	A	G	G	G	G	G	G	G	G	G	G	A	A	A	G	A	A	G	A	A	A	G	A	G	G	G	A
S1B_630874120	C/A	1B	630874120	+	C	C	C	C	C	C	C	C	C	C	A	C	C	C	C	C	C	C	A	C	C	C	C	C	C	C	C	C	C	A	A	A	C	A	A	C	A	A	A	C	A	C	C	C	A
S1B_631730562	G/C	1B	631730562	+	G	G	G	G	G	G	G	G	G	G	G	G	G	G	G	G	G	G	G	G	G	C	G	G	G	G	G	C	G	G	C	C	G	C	G	G	C	G	C	G	C	G	G	G	C
S1B_632036748	G/A	1B	632036748	+	G	G	G	A	G	G	G	G	G	G	G	G	G	G	G	G	G	G	G	G	G	G	G	G	G	G	G	G	G	G	G	G	G	G	G	G	G	G	G	G	G	G	G	G	G
S1B_632041760	A/G	1B	632041760	+	A	A	A	G	A	A	A	A	A	G	A	A	A	A	A	A	A	A	A	A	A	A	A	A	A	A	A	A	A	A	A	A	A	A	A	A	A	A	A	A	A	A	G	A	A
S1B_632041799	A/G	1B	632041799	+	A	A	A	G	A	A	A	A	A	G	A	A	A	A	A	A	A	A	A	A	A	A	A	A	A	A	A	A	A	A	A	A	A	A	A	A	A	A	A	A	A	A	G	A	A
S1B_632230506	T/C	1B	632230506	+	T	T	T	C	T	T	T	T	T	T	C	T	T	T	T	T	T	T	C	T	T	T	T	T	T	T	T	T	T	C	T	T	T	T	C	T	T	C	T	T	T	T	T	T	T
S1B_632296201	A/G	1B	632296201	+	A	A	A	G	A	A	A	A	A	R	G	A	A	A	A	A	A	A	G	A	A	A	A	A	A	A	A	A	A	G	A	A	A	A	G	A	A	G	A	A	A	A	G	A	A
S1B_632995672	C/G	1B	632995672	+	G	C	G	C	C	C	G	C	C	G	S	G	C	C	C	C	G	C	G	C	C	C	G	G	C	C	C	C	C	G	C	C	G	C	G	C	C	G	C	G	C	G	C	C	C
S1B_633126654	A/C	1B	633126654	+	A	A	A	C	A	A	A	A	A	A	C	A	A	A	A	A	A	A	A	A	A	A	A	A	A	A	A	A	A	C	A	A	A	A	C	A	A	C	A	A	A	A	C	A	A
S1B_633128623	C/T	1B	633128623	+	C	C	C	T	C	C	C	C	C	T	T	C	C	C	C	C	C	C	T	C	C	C	C	C	C	C	C	C	C	T	C	C	C	C	T	C	C	T	C	C	C	C	C	C	C
S1B_633456054	G/A	1B	633456054	+	A	A	A	G	A	A	A	A	A	G	G	A	A	A	A	A	A	A	G	A	A	G	G	G	G	A	A	G	A	G	G	G	A	G	G	A	G	G	G	A	G	A	G	A	G
S1B_633456092	G/A	1B	633456092	+	A	A	A	G	A	A	A	A	A	G	G	A	A	A	A	A	A	A	G	A	A	G	G	G	G	A	A	G	A	G	G	G	A	G	G	A	G	G	G	A	G	A	G	A	G
S1B_633763765	T/C	1B	633763765	+	T	Y	T	T	T	T	T	T	Y	Y	T	T	T	Y	Y	T	T	T	T	T	T	Y	T	T	T	T	T	Y	T	T	T	T	T	T	T	T	T	T	T	T	T	T	T	T	T
S1B_633780890	C/G	1B	633780890	+	G	G	G	C	G	G	G	G	G	C	C	G	G	G	G	G	G	G	C	G	G	C	C	C	C	G	G	C	G	C	C	C	G	C	C	G	C	C	C	G	C	G	C	G	C
S1B_634144946	C/G	1B	634144946	+	C	C	C	C	C	C	C	C	C	C	C	C	S	C	C	C	C	S	C	C	C	C	C	C	C	C	S	C	C	C	S	S	C	C	C	S	C	C	S	C	C	C	C	C	C
S1B_634762947	C/T	1B	634762947	+	C	C	C	C	C	C	C	C	C	C	C	C	C	C	C	C	C	C	C	C	C	T	C	C	C	C	C	T	C	C	T	T	C	T	C	C	T	C	T	C	T	C	C	C	T
S1B_634963307	G/T	1B	634963307	+	T	T	T	G	T	T	T	T	T	G	G	T	T	T	T	T	T	T	G	T	T	G	G	G	G	T	T	G	T	G	G	G	T	G	G	T	G	G	G	T	G	T	G	T	G
S1B_634986432	T/C	1B	634986432	+	C	C	C	T	C	C	C	C	C	T	T	Y	C	C	C	C	C	C	T	C	C	T	T	T	T	C	C	T	C	T	T	T	C	T	T	C	T	T	T	C	T	C	T	C	T
S1B_635076319	T/C	1B	635076319	+	C	C	C	T	C	C	C	C	C	Y	T	C	C	C	C	C	C	C	T	C	C	T	T	T	T	C	C	T	C	T	T	T	C	T	T	C	T	T	T	C	T	C	T	C	T
S1B_635076322	G/C	1B	635076322	+	C	C	C	G	C	C	C	C	C	S	G	C	C	C	C	C	C	C	G	C	C	G	G	G	G	C	C	G	C	G	G	G	C	G	G	C	G	G	G	C	G	C	G	C	G
S1B_635419300	T/A	1B	635419300	+	T	T	T	W	T	T	T	T	T	T	T	T	T	T	T	T	T	T	W	T	T	T	T	T	T	T	T	T	T	T	T	T	T	T	T	T	T	T	T	T	T	T	T	T	T
S1B_635707709	A/G	1B	635707709	+	A	A	R	A	A	A	A	A	A	A	A	A	R	A	A	R	A	A	A	A	A	A	A	A	A	A	R	A	R	A	A	R	A	R	A	A	R	A	A	A	R	A	A	A	R
S1B_636054183	A/G	1B	636054183	+	A	A	A	A	A	A	A	A	A	A	G	A	A	A	A	A	A	A	G	A	A	A	A	A	A	A	A	A	A	G	A	A	A	A	G	A	A	G	A	A	A	A	A	A	A
S1B_636139445	C/T	1B	636139445	+	C	C	C	T	C	C	C	C	C	T	C	C	C	C	C	C	C	C	C	C	C	C	T	T	T	C	C	C	C	C	C	C	C	C	C	C	C	C	C	C	C	C	T	C	C
S1B_636343401	C/A	1B	636343401	+	C	C	C	C	C	C	C	C	C	C	A	C	C	C	C	C	C	C	A	C	C	A	A	A	A	C	C	A	C	A	A	A	C	A	A	C	A	A	M	C	A	C	A	C	A
S1B_636380586	A/G	1B	636380586	+	G	G	G	A	G	G	G	G	G	G	A	G	G	G	G	G	G	G	A	G	G	A	A	A	A	G	G	A	G	A	A	A	G	A	A	G	A	A	A	G	A	G	A	G	A
S1B_636564242	G/A	1B	636564242	+	A	A	A	G	A	A	A	A	A	G	G	A	A	A	A	A	A	A	G	A	A	G	G	G	G	A	A	G	A	G	G	G	A	G	G	A	G	G	G	A	G	A	G	A	G
S1B_636714643	G/T	1B	636714643	+	G	G	G	G	G	G	G	G	G	T	T	G	G	G	G	G	G	G	T	G	G	G	G	G	G	G	G	T	G	T	T	T	G	T	T	G	T	T	T	G	T	G	T	G	T
S1B_636735717	G/A	1B	636735717	+	A	A	A	G	A	A	A	A	A	R	G	A	A	A	A	A	A	A	G	A	A	G	G	G	G	A	A	G	A	G	G	G	A	G	G	A	G	G	G	A	G	A	G	A	G
S1B_636941355	C/T	1B	636941355	+	C	C	C	T	C	C	C	C	C	C	T	C	C	C	C	C	C	C	T	C	C	C	T	T	T	C	C	C	C	T	C	C	C	C	T	C	C	T	C	C	C	C	C	C	C
S1B_637006711	G/C	1B	637006711	+	G	G	G	G	G	G	G	G	G	G	G	G	S	G	G	G	G	S	G	G	G	G	G	G	G	G	S	G	G	G	G	C	G	G	G	S	G	G	S	G	G	G	G	G	G
S1B_637175474	A/G	1B	637175474	+	A	A	A	A	A	R	A	A	R	A	A	A	R	G	A	A	A	A	A	A	A	A	G	R	A	A	A	R	A	A	A	A	A	G	A	R	A	A	A	A	A	A	A	R	A
S1B_637175485	T/C	1B	637175485	+	T	T	T	T	T	Y	T	T	Y	T	T	T	Y	C	T	T	T	T	T	T	T	T	C	Y	T	T	T	Y	T	T	T	T	T	C	T	Y	T	T	Y	T	T	T	T	Y	Y
S1B_637579915	A/G	1B	637579915	+	G	G	G	A	G	G	G	G	G	R	A	G	G	G	G	G	G	G	A	G	G	A	A	A	A	G	G	A	G	A	A	A	G	A	A	G	A	A	A	G	A	G	A	G	A
S1B_637579938	G/A	1B	637579938	+	A	A	A	G	A	A	A	A	A	R	G	A	A	A	A	A	A	A	G	A	A	G	G	G	G	A	A	G	A	G	G	G	A	G	G	A	G	G	G	A	G	A	G	A	G
S1B_637717480	C/G	1B	637717480	+	G	G	G	C	G	G	G	G	G	C	C	G	G	G	G	G	G	G	C	G	G	C	C	C	C	G	G	C	G	C	C	C	G	C	C	G	C	C	C	G	C	G	C	S	C
S1B_637717513	T/C	1B	637717513	+	C	C	C	T	C	C	C	C	C	T	T	C	C	C	C	C	C	C	T	C	C	T	T	T	T	C	C	T	C	T	T	T	C	T	T	C	Y	T	T	C	T	C	T	Y	T
S1B_637895375	A/G	1B	637895375	+	G	G	G	A	G	G	G	G	G	G	A	G	G	G	G	G	G	G	A	G	G	A	A	A	A	G	G	A	G	A	A	A	G	A	A	G	A	A	A	G	A	G	A	G	A
S1B_637895383	G/A	1B	637895383	+	A	A	A	G	A	A	A	A	A	A	G	A	A	A	A	A	A	A	G	A	A	G	G	G	G	A	A	G	A	G	G	G	A	G	G	A	G	G	G	A	G	A	G	A	G
S1B_637976892	C/T	1B	637976892	+	C	C	C	C	C	C	C	C	C	Y	C	C	C	C	C	C	C	C	Y	C	C	C	C	C	C	C	Y	C	C	C	C	C	C	C	C	C	C	C	C	C	C	C	C	C	C
S1B_637976897	A/G	1B	637976897	+	A	A	A	A	A	A	A	A	A	R	A	A	A	A	A	A	A	A	R	A	A	A	A	A	A	A	R	A	A	A	A	A	A	A	A	A	A	A	A	A	A	A	A	A	A
S1B_637976905	C/T	1B	637976905	+	C	C	C	C	C	C	C	C	C	Y	C	C	C	C	C	C	C	C	Y	C	C	C	C	C	C	C	Y	C	C	C	C	C	C	C	C	C	C	C	C	C	C	C	C	C	C
S1B_637986008	C/G	1B	637986008	+	C	C	C	C	C	C	C	C	C	S	C	C	C	C	C	C	C	C	S	C	C	C	C	C	C	C	S	C	C	C	C	C	C	C	C	C	C	C	C	C	C	C	C	G	C
S1B_637993531	A/G	1B	637993531	+	G	G	G	A	G	G	G	G	G	R	A	G	G	G	G	G	G	G	A	G	G	A	A	A	A	G	G	A	G	A	A	A	G	A	A	G	A	A	A	G	A	G	A	G	A
S1B_638179119	T/G	1B	638179119	+	K	T	G	T	T	T	K	G	T	T	T	T	T	T	T	T	T	T	K	T	T	T	T	T	T	T	T	T	T	T	T	T	K	T	T	K	T	T	T	K	T	K	K	K	T
S1B_638213375	A/G	1B	638213375	+	A	A	A	A	A	A	A	A	A	A	A	A	R	A	A	A	A	R	A	A	A	A	A	A	A	A	R	A	A	A	R	G	A	A	A	R	A	A	R	A	A	A	A	A	A
S1B_638213401	C/T	1B	638213401	+	C	C	C	T	C	C	C	C	C	C	T	C	C	C	C	C	C	C	T	C	C	T	T	T	T	C	C	T	C	T	Y	C	C	T	T	C	T	T	Y	C	T	C	C	C	T
S1B_638240720	G/A	1B	638240720	+	A	A	A	G	A	A	A	A	A	A	G	A	A	A	A	A	A	A	G	A	A	G	G	G	G	A	A	G	A	G	G	G	A	G	G	A	G	G	G	A	G	A	G	A	G
S1B_638277106	T/C	1B	638277106	+	T	T	T	T	T	T	T	T	T	T	T	T	T	T	T	T	T	T	T	T	T	C	T	T	T	T	T	C	T	T	C	C	T	C	T	T	C	T	C	T	C	T	T	T	C
S1B_638317576	T/G	1B	638317576	+	G	G	G	T	G	G	G	G	G	K	T	G	G	G	G	G	G	G	T	G	G	T	T	T	T	G	G	T	G	T	T	T	G	T	T	G	T	T	T	G	T	G	G	G	T
S1B_638776476	T/G	1B	638776476	+	T	T	G	K	T	T	K	T	T	T	T	T	T	T	T	T	T	T	K	K	G	T	T	K	T	T	T	T	T	T	T	T	T	T	T	T	K	T	T	T	K	T	T	T	T
S1B_638776487	C/T	1B	638776487	+	C	C	T	Y	C	C	Y	C	C	C	C	C	C	C	C	C	C	C	Y	Y	T	C	C	Y	C	C	C	C	C	C	C	C	C	C	C	C	Y	C	C	C	Y	C	C	C	C
S1B_638777488	C/G	1B	638777488	+	G	G	G	C	G	G	G	G	G	G	C	G	G	G	G	G	G	G	C	G	G	C	C	C	C	G	G	C	G	C	C	C	G	C	C	G	C	C	C	G	C	G	G	G	C
S1B_638874240	C/G	1B	638874240	+	G	G	G	C	G	G	G	G	G	S	C	G	G	G	G	G	G	G	C	G	G	C	C	C	C	G	G	C	G	C	C	C	G	C	C	G	C	C	C	G	C	G	G	G	C
S1B_638874249	G/C	1B	638874249	+	C	C	C	G	C	C	C	C	C	S	G	C	C	C	C	C	C	C	G	C	C	G	G	G	G	C	C	G	C	G	G	G	C	G	G	C	G	G	G	C	G	C	C	C	G
S1B_639064042	T/C	1B	639064042	+	C	C	C	T	C	C	C	C	C	Y	T	C	C	C	C	C	C	C	T	C	C	T	T	T	T	C	C	T	C	T	T	T	C	T	T	C	T	T	T	C	T	C	C	C	T
S1B_639080861	C/A	1B	639080861	+	A	A	A	C	A	A	A	A	A	A	C	A	A	A	A	A	A	A	C	A	A	C	C	C	C	A	A	C	A	C	C	C	A	C	C	A	C	C	C	A	C	A	A	A	C
S1B_639080886	A/G	1B	639080886	+	A	A	A	A	A	A	A	A	A	A	G	A	A	A	A	A	A	A	G	A	A	G	G	G	G	A	A	G	A	A	G	G	A	G	A	A	G	A	G	A	G	A	A	A	G
S1B_639080896	G/A	1B	639080896	+	A	A	A	G	A	A	A	A	A	A	G	A	A	A	A	A	A	A	G	A	A	G	G	G	G	A	A	G	A	G	G	G	A	G	G	A	G	G	G	A	G	A	A	A	G
S1B_639531991	C/T	1B	639531991	+	C	C	C	T	C	C	C	C	C	C	T	C	C	C	C	C	C	C	C	C	C	T	T	T	T	C	C	T	C	T	C	C	T	C	T	T	C	T	C	C	C	T	T	C	C
S1B_639704033	T/C	1B	639704033	+	C	C	C	T	C	C	C	C	C	Y	T	C	C	C	C	C	C	C	T	C	C	T	T	T	T	C	C	T	C	T	T	T	C	T	T	C	T	T	T	C	T	C	C	C	T
S1B_639721963	G/A	1B	639721963	+	G	G	G	G	G	G	G	G	G	G	G	G	G	G	G	G	G	G	G	G	G	A	A	A	A	G	G	A	G	G	A	A	G	A	G	G	A	G	A	G	A	G	G	G	A
S1B_639721969	C/T	1B	639721969	+	T	T	T	C	T	T	T	T	T	C	C	T	T	T	T	T	T	T	C	T	T	C	C	C	C	T	T	C	T	C	C	C	T	C	C	T	C	C	C	T	C	T	T	T	C
S1B_639721970	T/G	1B	639721970	+	T	T	T	T	T	T	T	T	T	T	T	T	T	T	T	T	T	T	T	T	T	G	G	G	G	T	T	G	T	T	G	G	T	G	T	T	G	T	G	T	G	T	T	T	G
S1B_639721992	A/G	1B	639721992	+	A	A	A	A	A	A	A	A	A	A	A	A	A	A	A	A	A	A	A	A	A	G	G	G	G	A	A	G	A	A	G	G	A	G	A	A	G	A	G	A	G	A	A	A	G
S1B_639722025	C/T	1B	639722025	+	C	C	C	C	C	C	C	C	C	C	C	C	C	C	C	C	C	C	C	C	C	T	T	T	T	C	C	T	C	C	T	T	C	T	C	C	T	C	T	C	T	C	C	C	T
S1B_639722035	C/T	1B	639722035	+	C	C	C	T	C	C	C	C	C	Y	T	C	C	C	C	C	C	C	T	C	C	C	C	C	C	C	C	C	C	T	C	C	C	C	T	C	C	T	C	C	C	C	C	C	C
S1B_639722049	C/T	1B	639722049	+	T	C	C	C	Y	Y	C	C	C	Y	C	C	C	C	C	C	C	C	C	T	C	C	C	C	C	C	C	C	C	C	C	C	C	C	C	Y	C	C	C	C	C	Y	C	C	C
S1B_640345120	A/G	1B	640345120	+	G	G	G	A	G	G	G	G	G	A	A	G	G	G	G	G	G	G	A	G	G	A	A	A	A	G	G	R	G	A	A	A	G	A	A	G	A	A	A	G	A	G	G	G	A
S1B_640575808	A/G	1B	640575808	+	A	A	A	A	A	A	A	A	A	A	A	A	A	A	A	A	A	A	A	A	A	A	A	A	A	A	A	A	A	A	A	A	G	A	R	A	A	G	A	A	A	A	A	A	A
S1B_640575828	A/T	1B	640575828	+	A	A	T	T	T	A	T	A	A	A	A	A	A	A	A	A	A	A	T	A	A	A	A	W	A	A	A	A	A	A	A	A	A	T	A	A	A	A	A	A	W	A	A	A	A
S1B_640955742	T/C	1B	640955742	+	T	T	T	T	T	T	T	T	T	T	T	T	T	T	T	T	T	T	T	T	T	Y	T	Y	T	T	T	T	T	T	T	T	T	Y	T	T	T	T	T	T	T	T	T	T	T
S1B_640955776	T/G	1B	640955776	+	T	T	T	T	T	T	T	T	T	T	T	T	T	T	T	T	T	T	T	T	T	T	T	T	T	T	T	T	T	T	T	T	T	T	T	T	K	T	T	T	T	T	T	T	T
S1B_641353504	G/T	1B	641353504	+	T	T	T	G	T	T	T	T	T	K	G	T	T	T	T	T	T	T	G	T	T	G	G	G	G	T	T	G	T	G	G	G	T	G	G	T	G	G	G	T	G	T	T	T	G
S1B_641353505	A/C	1B	641353505	+	C	C	C	A	C	C	C	C	C	M	A	C	C	C	C	C	C	C	A	C	C	A	A	A	A	C	C	A	C	A	A	A	C	A	A	C	A	A	A	C	A	C	C	C	A
S1B_641353513	G/A	1B	641353513	+	G	G	G	A	G	G	G	G	G	G	G	G	G	G	G	G	G	G	G	G	G	G	G	G	G	G	G	G	G	G	G	G	G	G	G	G	G	G	G	G	G	G	G	G	G
S1B_641643098	T/A	1B	641643098	+	T	T	T	T	T	T	T	T	T	T	T	T	T	T	T	T	T	T	T	T	W	A	A	A	A	T	T	A	T	T	A	A	T	A	T	T	A	T	A	T	A	T	T	T	A
S1B_641643297	A/C	1B	641643297	+	C	C	C	M	C	C	C	C	C	C	A	C	C	C	C	C	C	C	A	C	C	A	A	A	A	C	C	A	C	A	A	A	C	A	A	C	A	A	A	C	A	C	C	C	A
S1B_641980675	C/T	1B	641980675	+	T	T	T	C	T	T	T	T	T	T	C	T	T	T	T	T	T	T	C	T	T	C	C	C	C	T	T	C	T	C	C	C	T	C	C	T	C	C	C	T	C	T	T	T	C
S1B_641980684	T/C	1B	641980684	+	T	T	T	T	T	T	T	T	T	T	T	T	T	T	T	T	T	T	T	T	T	C	C	C	C	T	T	C	T	T	C	C	T	C	T	T	C	T	C	T	C	T	T	T	C
S1B_642150707	C/T	1B	642150707	+	T	T	T	C	Y	T	T	T	T	T	C	T	T	T	T	T	T	T	C	T	T	C	C	C	C	T	T	C	T	C	C	C	T	C	C	T	C	C	C	T	C	T	T	T	C
S1B_642150719	C/T	1B	642150719	+	C	C	C	C	C	C	C	C	C	C	C	C	C	C	C	C	C	C	C	C	C	T	T	T	T	C	C	T	C	C	T	T	C	T	C	C	T	C	T	C	T	C	C	C	T
S1B_642150723	G/A	1B	642150723	+	G	G	G	G	G	G	G	G	G	G	A	G	G	G	G	G	G	G	A	G	G	G	G	G	G	G	G	G	G	A	G	G	G	G	A	G	G	A	G	G	G	G	G	G	G
S1B_642662829	T/C	1B	642662829	+	C	C	C	T	C	C	C	C	C	T	T	C	C	C	C	C	C	C	T	C	C	T	T	T	T	C	C	T	C	T	T	T	C	T	T	C	T	T	T	C	T	C	C	C	T
S1B_643192496	C/T	1B	643192496	+	T	T	T	C	T	T	T	T	T	Y	C	T	T	T	T	T	T	T	C	T	T	C	C	C	C	T	T	C	T	C	C	C	T	C	C	T	C	C	C	T	C	T	T	T	C
S1B_643244972	T/C	1B	643244972	+	T	C	Y	T	C	Y	C	C	T	C	T	C	Y	C	Y	C	C	C	Y	Y	C	C	T	T	T	Y	Y	C	Y	T	T	T	T	T	T	T	T	T	T	Y	T	T	C	Y	T
S1B_643463021	T/C	1B	643463021	+	T	T	T	C	T	T	T	T	T	T	C	T	T	T	T	T	T	T	C	T	T	T	T	T	T	T	T	T	T	C	T	T	T	T	C	T	T	C	T	T	T	T	T	T	T
S1B_643766056	C/T	1B	643766056	+	C	C	C	T	C	C	C	C	C	C	T	C	C	C	C	C	C	C	T	C	C	C	C	C	C	C	C	C	C	T	C	C	C	C	T	C	C	T	C	C	C	C	C	C	C
S1B_643766060	G/A	1B	643766060	+	G	G	G	A	G	G	G	G	G	G	A	G	G	G	G	G	G	G	A	G	G	G	G	G	G	G	G	G	G	A	G	G	G	G	A	G	G	A	G	G	G	G	G	G	G
S1B_643766083	A/C	1B	643766083	+	A	A	A	C	A	A	A	A	A	A	C	A	A	A	A	A	A	A	C	A	A	A	A	A	A	A	A	A	A	C	A	A	A	A	C	A	A	C	A	A	A	A	A	A	A
S1B_643971797	A/G	1B	643971797	+	A	A	A	G	A	A	A	A	A	A	A	A	A	A	A	A	A	A	A	A	A	G	G	G	G	A	A	G	A	A	G	G	A	G	A	A	G	A	G	A	G	A	A	A	G
S1B_643971801	A/G	1B	643971801	+	A	A	A	G	A	A	A	A	A	A	A	A	A	A	A	A	A	A	A	A	A	G	G	G	G	A	A	G	A	A	G	G	A	G	A	A	G	A	G	A	G	A	A	A	G
S1B_643971846	C/T	1B	643971846	+	C	C	C	T	C	C	C	C	C	C	C	C	C	C	C	C	C	C	C	C	C	T	T	T	T	C	C	T	C	C	T	T	C	T	C	C	T	C	T	C	T	C	C	C	T
S1B_644028201	T/C	1B	644028201	+	C	C	C	T	C	C	C	C	C	T	T	C	C	C	C	C	C	C	T	C	C	T	T	T	T	C	C	Y	C	T	T	T	C	T	T	C	T	T	T	C	T	C	C	C	T
S1B_644073141	G/A	1B	644073141	+	G	G	G	G	G	G	G	G	G	G	A	G	G	G	G	G	G	G	A	G	G	A	A	A	A	G	G	A	G	A	A	A	G	A	A	G	A	A	A	G	A	G	G	G	A
S1B_644094333	G/A	1B	644094333	+	G	G	G	G	G	G	G	G	G	G	A	G	G	G	G	G	G	G	A	G	G	G	G	G	G	G	G	G	G	A	G	G	G	G	A	G	G	A	G	G	G	G	G	G	G
S1B_644197933	G/A	1B	644197933	+	G	G	G	G	G	G	G	G	G	G	A	G	G	G	G	G	G	G	A	G	G	G	G	G	G	G	G	G	G	A	G	G	G	G	A	G	G	A	G	G	G	G	G	G	G
S1B_644603656	G/C	1B	644603656	+	G	S	G	G	G	S	G	G	G	S	G	C	G	G	G	G	G	S	G	G	G	G	G	S	S	G	G	G	G	G	G	S	G	G	G	G	G	G	G	G	G	G	G	G	G
S1B_644603680	C/G	1B	644603680	+	C	S	S	C	C	C	S	G	G	S	S	C	C	G	G	G	C	C	S	C	G	S	C	C	C	S	C	S	C	S	C	C	C	C	C	C	C	S	C	C	C	C	C	C	C
S1B_644603687	G/C	1B	644603687	+	G	S	G	G	G	S	G	G	G	S	G	C	G	G	G	G	G	S	G	G	G	G	G	S	S	G	G	G	G	G	G	S	G	G	G	G	G	G	G	G	G	G	G	G	G
S1B_645123317	T/C	1B	645123317	+	T	T	C	C	T	T	C	C	T	T	C	T	T	T	T	T	T	T	C	T	T	T	C	C	C	T	T	T	T	C	T	T	T	T	C	T	T	C	T	T	Y	T	T	T	T
S1B_645130273	G/A	1B	645130273	+	G	G	G	A	G	G	G	G	G	G	A	G	G	G	G	G	G	G	A	G	G	G	A	A	A	G	G	G	G	A	G	G	G	G	A	G	G	A	G	G	G	G	G	G	G
S1B_645130298	A/G	1B	645130298	+	A	A	G	G	A	A	G	G	A	A	G	A	A	A	A	A	A	A	G	A	A	A	G	G	G	A	A	A	A	G	A	A	A	A	G	A	A	G	A	A	A	A	A	A	A
S1B_645167034	G/C	1B	645167034	+	C	C	G	G	C	C	G	G	C	S	G	C	S	C	C	C	C	C	G	C	C	G	G	G	G	C	C	G	C	G	G	G	C	G	G	S	G	G	G	C	G	C	C	C	G
S1B_645167052	T/C	1B	645167052	+	T	T	T	T	T	T	T	T	T	T	T	T	Y	T	T	T	T	T	T	T	T	T	T	T	T	T	T	T	T	T	Y	Y	T	T	T	Y	T	T	Y	T	T	T	T	T	T
S1B_645171383	G/A	1B	645171383	+	G	G	G	A	G	G	G	G	G	R	G	G	G	G	G	G	G	G	G	G	G	G	A	A	A	G	G	G	G	G	G	G	G	G	G	G	G	G	G	G	G	G	G	G	G
S1B_645171392	G/A	1B	645171392	+	A	A	G	G	A	A	G	G	A	R	G	A	A	A	A	A	A	A	G	A	A	G	G	G	G	A	A	G	A	G	G	G	A	G	G	A	G	G	G	A	G	A	A	A	G
S1B_645178171	T/A	1B	645178171	+	A	A	T	T	A	A	T	T	A	A	T	A	A	A	A	A	A	A	T	A	A	T	T	T	T	A	A	W	A	T	T	T	A	T	T	A	T	T	T	A	T	A	A	A	T
S1B_645240550	G/C	1B	645240550	+	C	C	G	G	C	C	G	G	C	C	G	C	C	C	C	C	C	C	G	C	C	S	G	G	G	C	C	G	C	G	G	G	C	G	G	C	G	G	G	C	G	C	C	C	G
S1B_645240787	T/C	1B	645240787	+	C	C	T	T	C	C	T	T	C	C	T	C	C	C	C	C	C	C	T	C	C	T	T	T	T	C	C	T	C	T	T	T	C	T	T	C	T	T	T	C	T	C	C	C	T
S1B_645403997	A/G	1B	645403997	+	G	G	A	A	G	G	A	A	G	G	A	G	G	G	G	G	G	G	A	G	G	A	A	A	A	G	G	A	G	A	A	A	G	A	A	G	A	A	A	G	A	G	G	G	A
S1B_645404011	G/A	1B	645404011	+	A	A	G	G	A	A	G	G	A	A	G	A	A	A	A	A	A	A	G	A	A	G	G	G	G	A	A	G	A	G	G	G	A	G	G	A	G	G	G	A	G	A	A	A	G
S1B_645619712	C/G	1B	645619712	+	C	C	C	C	C	C	C	C	S	C	C	C	C	C	C	C	C	C	C	C	C	C	C	C	C	C	C	C	C	C	C	C	C	C	C	C	S	C	C	C	C	C	C	C	C
S1B_645621599	G/A	1B	645621599	+	A	A	G	G	A	A	G	G	A	A	G	A	A	A	A	A	A	A	G	A	A	G	G	G	G	A	A	G	A	G	G	G	A	G	G	A	G	G	G	A	G	A	A	A	G
S1B_645621601	G/A	1B	645621601	+	A	A	G	G	A	A	G	G	A	A	G	A	A	A	A	A	A	A	G	A	A	G	G	G	G	A	A	G	A	G	G	G	A	G	G	A	G	G	G	A	G	A	A	A	G
S1B_646120311	T/C	1B	646120311	+	T	T	T	T	T	T	T	T	T	T	T	Y	Y	T	T	T	T	T	T	T	T	T	T	T	T	T	T	T	T	T	Y	T	T	T	T	T	T	Y	T	T	T	T	T	Y	T
S1B_646120313	T/C	1B	646120313	+	T	T	Y	Y	T	T	T	T	T	T	T	T	T	T	T	T	T	T	Y	T	Y	T	T	T	T	T	T	Y	T	T	Y	T	T	T	T	T	T	Y	T	T	T	T	T	T	T
S1B_646120316	T/C	1B	646120316	+	T	T	T	T	T	T	T	T	T	T	T	T	T	T	Y	T	T	T	T	T	Y	T	T	T	T	Y	T	T	T	T	T	T	T	T	T	T	T	Y	T	Y	T	Y	T	T	T
S1B_646120317	T/C	1B	646120317	+	T	T	T	T	Y	Y	Y	T	T	T	T	T	T	Y	T	T	T	T	T	T	Y	T	T	T	T	T	T	T	T	T	T	T	T	T	T	T	T	T	T	T	T	T	T	Y	Y
S1B_646132749	C/T	1B	646132749	+	C	Y	C	C	C	C	C	C	Y	C	C	Y	C	C	C	C	C	C	C	C	C	Y	Y	C	C	C	C	C	C	C	C	C	C	C	Y	C	C	C	Y	C	C	C	Y	Y	Y
S1B_646285725	T/C	1B	646285725	+	C	C	T	T	C	C	T	T	C	Y	T	C	C	C	C	C	C	C	T	C	C	T	T	T	T	C	C	T	C	T	T	T	C	T	T	C	T	T	T	C	T	C	C	C	T
S1B_646341742	G/A	1B	646341742	+	A	A	G	G	A	A	G	G	A	A	G	A	A	A	A	A	A	A	G	A	A	G	G	G	G	A	A	G	A	G	G	G	A	G	G	A	G	G	G	A	G	A	A	A	G
S1B_646439500	G/A	1B	646439500	+	A	A	G	G	A	A	G	G	A	A	G	A	A	A	A	A	A	A	G	A	A	G	G	G	G	A	A	G	A	G	G	G	A	G	G	A	G	G	G	A	G	A	A	A	G
S1B_647559819	A/G	1B	647559819	+	A	A	A	A	A	A	A	A	A	A	A	A	R	A	A	A	A	R	A	A	R	A	A	A	A	A	R	A	A	A	A	R	A	A	A	R	A	A	R	A	A	A	A	A	A
S1B_647559830	C/G	1B	647559830	+	C	C	C	C	C	C	C	C	C	C	C	C	S	C	C	C	C	S	C	C	S	C	C	C	C	C	S	C	C	C	C	S	C	C	C	S	C	C	S	C	C	C	C	C	C
S1B_647559836	G/A	1B	647559836	+	G	G	G	G	G	G	G	G	G	G	G	G	R	G	G	G	G	R	G	G	R	G	G	G	G	G	R	G	G	G	G	R	G	G	G	R	G	G	R	G	G	G	G	G	G
S1B_647826361	A/T	1B	647826361	+	A	A	T	T	A	A	T	T	A	A	T	A	A	A	A	A	A	A	T	A	A	A	T	T	T	A	A	A	A	T	A	A	A	A	T	A	A	T	A	A	A	A	A	A	A
S1B_648252445	G/A	1B	648252445	+	G	G	G	G	G	G	G	G	G	G	G	G	G	G	G	G	G	G	G	G	G	A	A	A	A	G	G	A	G	G	A	A	G	A	G	G	A	G	A	G	A	G	G	G	A
S1B_648522747	A/G	1B	648522747	+	A	A	A	A	A	A	A	A	A	A	A	A	A	A	A	A	A	A	A	A	A	G	G	G	G	A	A	G	A	A	G	G	A	G	A	A	G	A	G	A	G	A	A	A	G
S1B_648529735	A/G	1B	648529735	+	A	R	A	A	A	A	A	A	A	A	A	A	R	A	A	A	A	G	A	A	R	A	A	A	A	A	G	A	A	A	G	R	A	A	A	R	A	A	G	A	A	A	G	A	A
S1B_648529737	C/T	1B	648529737	+	C	C	T	T	C	C	T	T	C	C	T	C	C	C	C	C	C	C	T	C	C	T	T	T	T	C	C	T	C	T	C	Y	C	T	T	C	T	T	C	C	Y	C	C	C	T
S1B_648529761	T/C	1B	648529761	+	T	Y	T	T	T	T	T	T	T	T	T	T	Y	T	T	T	T	C	T	T	Y	T	T	T	T	T	C	T	T	T	C	Y	T	T	T	C	T	T	C	T	T	T	C	T	T
S1B_648529766	T/A	1B	648529766	+	T	W	T	T	T	T	T	T	T	T	T	T	W	T	T	T	T	A	T	T	W	T	T	T	T	T	A	T	T	T	A	W	T	T	T	A	T	T	A	T	T	T	A	T	T
S1B_648538899	G/T	1B	648538899	+	G	G	T	T	G	G	T	T	G	G	G	G	G	G	G	G	G	G	G	G	G	G	G	G	G	G	G	G	G	G	G	G	G	G	G	G	G	G	G	G	G	G	G	G	G
S1B_648538903	C/T	1B	648538903	+	C	C	T	T	C	C	T	T	C	C	C	C	C	C	C	C	C	C	C	C	C	C	C	C	C	C	C	C	C	C	C	C	C	C	C	C	C	C	C	C	C	C	C	C	C
S1B_648601305	A/T	1B	648601305	+	A	A	A	T	A	A	A	A	A	A	A	A	A	A	A	A	A	A	A	A	A	W	T	T	T	A	A	T	A	A	T	T	A	T	A	A	T	A	T	A	T	A	A	A	T
S1B_648916379	T/G	1B	648916379	+	G	G	T	T	G	G	T	T	G	G	T	G	G	G	G	G	G	G	T	G	G	T	T	T	T	G	G	T	G	T	T	T	G	T	T	G	T	T	T	G	T	G	G	G	T
S1B_649236076	T/A	1B	649236076	+	T	T	W	T	T	T	T	T	T	T	T	T	T	T	T	T	T	T	T	T	T	T	T	T	T	T	T	T	T	T	T	W	T	T	T	T	W	T	T	T	T	T	T	T	T
S1B_649236099	A/G	1B	649236099	+	A	A	R	A	A	A	A	A	A	A	A	A	A	A	A	A	A	A	A	A	A	A	A	A	A	A	A	A	A	A	A	R	A	A	A	A	R	A	R	A	A	A	A	A	A
S1B_649944921	G/T	1B	649944921	+	G	G	G	G	G	G	G	G	T	G	G	G	G	K	T	K	G	G	G	G	G	K	G	G	G	G	G	G	G	G	G	G	G	G	G	G	G	G	G	G	G	G	G	G	G
S1B_649944922	T/C	1B	649944922	+	T	T	T	T	T	T	T	T	C	T	T	T	T	Y	C	Y	T	T	T	T	Y	Y	T	T	T	T	T	T	T	T	T	T	T	T	T	T	T	T	T	T	T	T	T	T	T
S1B_649944939	T/C	1B	649944939	+	T	T	T	T	T	T	T	T	C	T	T	T	T	Y	C	Y	T	T	T	T	Y	Y	T	T	T	T	T	T	T	T	T	T	T	T	T	T	T	T	T	T	T	T	T	T	T
S1B_649944951	T/C	1B	649944951	+	T	T	T	T	T	T	T	T	C	T	T	T	T	Y	C	Y	T	T	T	T	Y	Y	T	T	T	T	T	T	T	T	T	T	T	T	T	T	T	T	T	T	T	T	T	T	T
S1B_650139971	C/T	1B	650139971	+	C	C	C	C	C	C	C	C	C	C	C	C	C	C	C	C	C	C	C	C	C	C	C	C	C	C	C	C	C	C	C	T	C	C	C	C	C	C	C	C	T	C	C	C	C
S1B_650398972	C/A	1B	650398972	+	C	C	C	C	C	C	C	C	C	C	A	C	C	C	C	C	C	C	C	C	C	C	C	C	C	C	C	C	C	C	C	C	C	C	A	C	C	A	C	C	C	C	C	C	C
S1B_651263972	A/G	1B	651263972	+	A	A	A	A	A	A	A	A	A	A	A	A	R	A	A	A	A	R	A	A	R	A	A	A	A	A	R	A	A	A	R	R	A	A	A	R	A	A	G	A	A	A	A	A	A
S1B_651307591	A/C	1B	651307591	+	A	A	A	A	A	A	A	A	A	C	C	A	A	A	A	A	A	A	C	A	A	A	A	A	A	A	A	A	A	C	A	A	A	A	C	A	A	C	A	A	A	A	A	A	A
S1B_651952686	T/C	1B	651952686	+	T	T	T	T	T	T	T	T	T	C	C	T	T	T	T	T	T	T	C	T	T	T	T	T	T	T	T	T	T	C	T	T	T	T	C	T	T	C	T	T	T	T	T	T	T
S1B_652151042	G/C	1B	652151042	+	G	G	G	G	G	G	G	G	G	G	C	G	G	G	G	G	G	G	C	G	G	G	G	G	G	G	G	G	G	C	G	G	G	G	S	G	G	C	G	G	G	G	G	G	G
S1B_652401999	G/C	1B	652401999	+	G	G	G	G	G	G	G	G	G	C	C	G	G	G	G	G	G	G	C	G	G	G	G	G	G	G	G	G	G	C	G	G	G	G	C	G	G	C	G	G	G	G	G	G	G
S1B_652490311	C/T	1B	652490311	+	C	C	C	C	C	C	C	C	C	C	T	C	C	C	C	C	C	C	T	C	C	C	C	C	C	C	C	C	C	T	C	C	C	C	T	C	C	T	C	C	C	C	C	C	C
S1B_652627511	G/A	1B	652627511	+	G	G	A	G	A	A	A	A	A	G	A	G	G	G	A	A	G	G	A	G	G	A	A	A	A	G	G	A	G	A	G	G	G	G	A	G	G	A	G	G	G	G	G	A	G
S1B_652793956	C/T	1B	652793956	+	T	C	C	C	Y	C	C	C	C	C	C	Y	C	C	C	C	C	C	C	C	Y	C	C	C	C	C	Y	Y	C	C	C	C	C	Y	C	C	C	C	C	C	C	C	C	C	C
S1B_652793970	C/G	1B	652793970	+	C	C	S	C	C	C	C	C	C	C	C	C	C	C	S	G	C	C	C	C	C	S	S	S	G	C	C	C	C	C	C	C	C	C	C	C	C	C	C	C	G	C	C	C	C
S1B_652793971	C/T	1B	652793971	+	C	C	Y	C	C	C	C	C	C	C	C	C	C	C	Y	T	C	C	C	C	C	Y	Y	Y	T	C	C	C	C	C	C	C	C	C	C	C	C	C	C	C	T	C	C	C	C
S1B_652793975	C/T	1B	652793975	+	T	C	C	C	Y	C	C	C	C	C	C	Y	C	C	C	C	C	C	C	C	Y	C	C	C	C	C	Y	Y	C	C	C	C	C	Y	C	C	C	C	C	C	C	C	C	C	C
S1B_652793992	G/A	1B	652793992	+	G	G	R	G	G	G	G	G	G	G	G	G	G	G	R	A	G	G	G	G	G	R	R	R	A	G	G	G	G	G	G	G	G	G	G	G	G	G	G	G	A	G	G	G	G
S1B_652861229	T/C	1B	652861229	+	T	C	T	C	T	T	T	T	T	T	C	C	C	C	T	T	C	C	C	C	C	T	T	T	T	C	C	T	C	C	T	T	T	T	C	T	T	C	T	T	T	T	T	T	T
S1B_652990630	C/T	1B	652990630	+	C	C	C	C	C	C	C	C	C	C	C	C	C	C	C	C	C	C	C	C	C	C	C	C	C	Y	Y	C	C	C	Y	Y	T	C	C	C	C	C	C	C	C	C	C	C	C
S1B_652990652	T/C	1B	652990652	+	T	T	T	T	T	T	T	T	T	T	T	T	T	T	T	T	T	T	T	T	T	T	T	T	T	Y	Y	T	T	T	Y	Y	C	T	T	T	T	T	T	T	T	T	T	T	T
S1B_653298921	G/A	1B	653298921	+	G	G	R	G	R	R	A	A	A	R	G	G	G	G	R	R	G	G	G	G	G	G	R	G	R	G	G	G	G	G	G	G	G	G	G	G	G	G	G	G	G	G	G	G	G
S1B_653817330	T/C	1B	653817330	+	T	T	C	T	C	C	C	C	C	C	T	T	T	T	C	C	Y	T	T	T	T	T	C	C	C	T	T	T	T	T	T	T	T	T	T	T	T	T	T	T	T	T	T	T	T
S1B_653888290	A/G	1B	653888290	+	A	A	G	A	G	G	G	G	G	G	A	A	A	A	G	G	A	A	A	A	A	A	G	G	G	A	A	A	A	A	A	A	A	A	A	A	A	A	A	A	A	A	A	A	A
S1B_653888291	T/A	1B	653888291	+	T	T	A	T	A	A	A	A	A	A	T	T	T	T	A	A	T	T	T	T	T	T	A	A	A	T	T	T	T	T	T	T	T	T	T	T	T	T	T	T	T	T	T	T	T
S1B_653895289	T/C	1B	653895289	+	T	T	C	T	C	C	C	C	C	C	T	T	T	T	C	C	T	T	T	T	T	T	C	C	C	T	T	T	T	T	T	T	T	T	T	T	T	T	T	T	T	T	T	T	T
S1B_654121770	G/A	1B	654121770	+	G	G	A	G	A	A	A	A	A	A	G	G	G	G	A	A	G	G	G	G	G	G	A	A	A	G	G	G	G	G	G	G	G	G	G	G	G	G	G	G	G	G	G	G	G
S1B_654259191	A/T	1B	654259191	+	A	A	T	A	T	T	T	T	T	T	A	A	A	A	T	T	A	A	A	A	A	A	T	T	T	A	A	A	A	A	A	A	A	A	A	A	A	A	A	A	A	A	A	A	A
S1B_654292189	G/T	1B	654292189	+	G	G	G	G	G	G	G	G	G	G	G	G	K	G	G	G	G	K	G	G	G	G	G	G	G	G	K	G	G	G	G	K	G	G	G	K	G	G	K	G	G	G	G	G	G
S1B_654482498	C/G	1B	654482498	+	C	C	G	C	G	G	G	G	G	G	C	C	C	C	G	G	C	C	C	C	C	C	G	G	G	C	C	C	S	C	C	C	C	C	C	C	C	C	C	C	C	C	C	C	C
S1B_654482513	T/C	1B	654482513	+	T	T	C	T	C	C	C	C	C	C	T	T	T	T	C	C	T	T	T	T	T	T	C	C	C	T	T	T	Y	T	T	T	T	T	T	T	T	T	T	T	T	T	T	T	T
S1B_654495898	C/T	1B	654495898	+	C	C	T	C	T	T	T	T	T	T	C	C	C	C	T	T	C	C	C	C	C	C	T	T	T	C	C	C	C	C	C	C	C	C	C	C	C	C	C	C	C	C	C	C	C
S1B_654495922	C/T	1B	654495922	+	C	C	T	C	T	T	T	T	T	C	C	C	C	C	T	T	C	C	C	C	C	C	T	T	T	C	C	C	C	C	C	C	C	C	C	C	C	C	C	C	C	C	C	C	C
S1B_654497823	C/A	1B	654497823	+	C	C	A	C	A	A	A	A	A	A	C	C	C	C	A	A	C	C	C	C	C	C	A	A	A	C	C	C	C	C	C	C	C	C	C	C	C	C	C	C	C	C	C	C	C
S1B_654499999	A/G	1B	654499999	+	A	A	G	A	G	G	G	G	G	G	A	A	A	A	G	G	A	A	A	A	A	A	G	G	G	A	A	A	A	A	A	A	A	A	A	A	A	A	A	A	A	A	A	A	A
S1B_654573877	G/C	1B	654573877	+	G	G	C	G	C	C	C	C	C	C	G	G	G	G	C	C	G	G	G	G	G	G	C	C	C	G	G	G	G	G	G	G	G	G	G	G	G	G	G	G	G	G	G	G	G
S1B_654573879	G/A	1B	654573879	+	G	G	A	G	A	A	A	A	A	A	G	G	G	G	A	A	G	G	G	G	G	G	A	A	A	G	G	G	G	G	G	G	G	G	G	G	G	G	G	G	G	G	G	G	G
S1B_654573891	G/A	1B	654573891	+	G	G	A	G	A	A	A	A	A	A	G	G	G	G	A	A	G	G	G	G	G	G	A	A	A	G	G	G	G	G	G	G	G	G	G	G	G	G	G	G	G	G	G	G	G
S1B_654858410	A/T	1B	654858410	+	A	W	A	A	A	A	A	A	A	A	A	A	A	A	A	A	W	A	A	A	A	W	A	A	A	A	A	A	A	A	A	A	A	A	A	A	A	A	A	A	A	A	A	A	A
S1B_655258416	T/C	1B	655258416	+	T	T	C	T	C	C	C	C	C	C	T	T	T	T	C	C	T	T	T	T	T	T	C	C	C	T	T	T	T	T	T	T	T	T	T	T	T	T	T	T	T	T	T	T	T
S1B_655433369	G/A	1B	655433369	+	G	G	A	G	A	A	A	A	A	A	G	G	G	G	A	A	G	G	G	G	G	G	A	A	A	G	G	G	G	G	G	G	G	G	G	G	G	G	G	G	G	G	G	G	G
S1B_655433376	T/C	1B	655433376	+	T	T	C	T	C	C	C	C	C	C	T	T	T	T	C	C	T	T	T	T	T	T	C	C	C	T	T	T	T	T	T	T	T	T	T	T	T	T	T	T	T	T	T	T	T
S1B_655461894	T/C	1B	655461894	+	T	T	C	T	C	C	C	C	C	C	T	T	T	T	C	C	T	T	T	T	T	T	C	C	C	T	T	T	T	T	T	T	T	T	T	T	T	T	T	T	T	T	T	Y	T
S1B_656114708	G/A	1B	656114708	+	G	G	A	G	A	A	A	A	A	A	G	G	G	G	A	A	G	G	G	G	G	G	A	A	A	G	G	G	G	G	G	G	G	G	G	G	G	G	G	G	G	G	G	G	G
S1B_657787457	A/T	1B	657787457	+	A	A	T	W	A	A	T	T	T	T	W	A	A	A	A	A	A	A	T	A	A	W	A	A	A	T	A	A	A	W	A	A	A	A	T	A	A	W	A	A	A	A	A	W	A
S1B_659972178	A/T	1B	659972178	+	A	A	T	A	T	T	T	T	T	A	A	A	A	A	T	T	A	A	A	A	A	A	T	T	T	A	A	A	A	A	A	A	A	A	A	A	A	A	A	A	A	A	A	A	A
S1B_659972215	G/C	1B	659972215	+	G	G	C	G	C	C	C	C	C	G	G	G	G	G	C	C	G	G	G	G	G	G	C	C	C	G	G	G	G	G	G	G	G	G	G	G	G	G	G	G	G	G	G	G	G
S1B_660369485	G/T	1B	660369485	+	G	G	T	G	T	T	T	T	T	G	G	G	G	G	T	T	G	G	G	G	G	G	T	T	T	G	G	G	G	G	G	G	G	G	G	G	G	G	G	G	G	G	G	G	G
S1B_660369496	C/T	1B	660369496	+	C	C	T	C	T	T	T	T	T	C	C	C	C	C	T	T	C	C	C	C	C	C	T	T	T	C	C	C	C	C	C	C	C	C	C	C	C	C	C	C	C	C	C	C	C
S1B_660414169	C/A	1B	660414169	+	C	C	C	A	M	C	C	C	C	C	C	C	M	C	C	C	C	C	C	A	C	C	C	C	C	C	A	C	C	C	A	A	C	A	C	C	C	C	C	C	A	C	C	C	C
S1B_660414180	A/G	1B	660414180	+	A	A	G	G	G	G	G	G	G	A	A	A	R	A	G	G	A	A	A	G	A	A	G	G	G	A	G	A	A	A	G	A	A	G	A	A	A	A	A	A	G	A	A	A	A
S1B_660414195	C/T	1B	660414195	+	C	C	C	T	Y	C	C	C	C	C	C	C	Y	C	C	C	C	C	C	T	C	C	C	C	C	C	T	C	C	C	T	T	C	T	C	C	C	C	C	C	T	C	C	C	C
S1B_660414202	A/G	1B	660414202	+	A	A	G	G	G	G	G	G	G	A	A	A	R	A	G	G	A	A	A	G	A	A	G	G	G	A	G	A	A	A	G	A	A	G	A	A	A	A	A	A	G	A	A	A	A
S1B_660414220	A/G	1B	660414220	+	A	A	G	A	R	G	G	G	G	A	A	A	A	A	G	G	A	A	A	A	A	A	G	G	G	A	A	A	A	A	A	A	A	A	A	A	A	A	A	A	A	A	A	A	A
S1B_660561787	G/A	1B	660561787	+	G	G	A	G	A	A	A	A	A	G	G	G	G	G	A	A	G	G	G	G	G	G	A	A	A	G	G	G	G	G	G	G	G	G	G	G	G	G	G	G	G	G	G	G	G
S1B_660831987	A/G	1B	660831987	+	A	A	G	A	G	G	G	G	G	A	A	A	A	A	G	G	A	A	A	A	A	A	G	G	G	A	A	A	A	A	A	A	A	A	A	A	A	A	A	A	A	A	A	A	A
S1B_660831993	T/C	1B	660831993	+	T	T	C	T	C	C	C	C	C	T	T	T	T	T	C	C	T	T	T	T	T	T	C	C	C	T	T	T	T	T	T	T	T	T	T	T	T	T	T	T	T	T	T	T	T
S1B_660832028	A/C	1B	660832028	+	A	A	C	A	C	C	C	C	C	A	A	A	A	A	C	C	A	A	A	A	A	A	C	C	C	A	A	A	A	A	A	A	A	A	A	A	A	A	A	A	A	A	A	A	A
S1B_661009156	C/A	1B	661009156	+	C	C	A	C	A	A	A	A	A	C	C	C	C	C	A	A	C	C	C	C	C	C	A	A	A	C	C	C	C	C	C	C	C	C	C	C	C	C	C	C	C	C	C	C	C
S1B_661009165	C/T	1B	661009165	+	C	C	T	C	T	T	T	T	T	C	C	C	C	C	T	T	C	C	C	C	C	C	T	T	T	C	C	C	C	C	C	C	C	C	C	C	C	C	C	C	C	C	C	C	C
S1B_661009173	T/C	1B	661009173	+	T	T	C	T	C	C	C	C	C	T	T	T	T	T	C	C	T	T	T	T	T	T	C	C	C	T	T	T	T	T	T	T	T	T	T	T	T	T	T	T	T	T	T	T	T
S1B_661215184	C/T	1B	661215184	+	C	C	T	C	T	T	T	T	T	C	C	C	C	C	T	T	C	C	C	C	C	C	T	T	T	C	C	C	C	C	C	C	C	C	C	C	C	C	C	C	C	C	C	C	C
S1B_661439441	T/C	1B	661439441	+	T	T	C	C	C	C	C	C	C	C	T	T	T	T	C	C	T	T	T	T	T	T	C	C	C	T	T	T	T	T	T	T	T	T	T	T	T	T	T	T	T	T	T	T	T
S1B_661843464	C/A	1B	661843464	+	C	C	C	A	C	C	C	C	C	C	C	C	C	C	C	C	C	C	C	C	C	C	C	C	C	C	C	C	C	C	C	C	C	C	C	C	C	C	C	C	C	C	C	C	C
S1B_661849717	T/C	1B	661849717	+	C	T	C	T	C	C	C	C	C	T	T	Y	T	T	C	C	T	T	T	T	T	T	C	C	C	T	T	T	T	T	T	T	C	T	T	C	T	T	T	C	T	C	C	C	T
S1B_661927333	C/T	1B	661927333	+	T	C	T	C	T	T	T	T	T	C	C	C	C	C	T	T	C	C	C	C	C	C	T	T	T	C	C	C	C	C	C	C	T	C	C	T	C	C	C	T	C	T	T	T	C
S1B_662381359	T/G	1B	662381359	+	G	T	G	G	G	G	G	G	G	T	T	T	T	T	G	G	T	T	T	T	T	T	G	G	G	T	T	T	T	T	T	T	G	T	T	G	T	T	T	G	T	G	G	G	T
S1B_662409199	G/A	1B	662409199	+	G	R	G	G	G	G	G	G	R	R	G	G	G	R	R	R	G	G	G	G	G	R	G	G	G	G	G	G	G	G	G	G	G	G	G	G	G	G	G	G	G	G	G	G	G
S1B_662898430	T/C	1B	662898430	+	C	T	C	T	C	C	C	C	C	T	T	T	T	T	C	C	T	T	T	T	T	T	C	C	C	T	T	T	T	T	T	T	C	T	T	C	T	T	T	C	T	C	C	C	T
S1B_662898459	G/A	1B	662898459	+	A	G	A	G	A	A	A	A	A	G	G	G	G	G	A	A	G	G	G	G	G	G	A	A	A	G	G	G	G	G	G	G	A	G	G	A	G	G	G	A	G	A	A	A	G
S1B_662898485	A/G	1B	662898485	+	G	A	G	A	G	G	G	G	G	A	A	A	A	A	G	G	A	A	A	A	A	A	G	G	G	A	A	A	A	A	A	A	G	A	A	G	A	A	A	G	A	G	G	G	A
S1B_662935916	T/C	1B	662935916	+	C	T	C	T	C	C	C	C	C	T	T	T	T	T	C	C	T	T	T	T	T	T	C	C	C	T	T	T	T	T	T	T	C	T	T	C	T	T	T	C	T	C	C	C	T
S1B_663108731	T/G	1B	663108731	+	T	K	T	T	T	T	T	G	T	T	K	T	T	T	T	T	T	T	T	T	T	T	T	T	K	T	T	G	K	T	T	T	T	T	T	T	T	T	T	T	T	T	T	T	K
S1B_663108740	T/C	1B	663108740	+	T	Y	T	T	T	T	T	C	T	T	Y	T	T	T	T	T	T	T	T	T	T	T	T	T	Y	T	T	C	Y	T	T	T	T	T	T	T	T	T	T	T	T	T	T	T	Y
S1B_663143429	A/T	1B	663143429	+	T	A	T	A	T	T	T	T	T	A	A	A	A	A	T	T	A	A	A	A	A	A	T	T	T	A	A	A	A	A	A	A	T	A	A	T	A	A	A	T	A	T	T	T	A
S1B_663216310	C/T	1B	663216310	+	T	C	T	C	T	T	T	T	T	C	C	C	C	C	T	T	C	C	C	C	C	C	T	T	T	C	C	C	C	C	C	C	T	C	C	T	C	C	C	T	C	T	T	T	C
S1B_663216372	A/T	1B	663216372	+	A	A	A	A	A	A	A	A	A	W	A	W	A	A	A	A	A	A	W	A	A	A	W	A	W	W	A	A	A	A	A	A	A	A	A	W	A	A	A	A	W	A	A	W	A
S1B_663389173	A/G	1B	663389173	+	G	A	G	A	G	G	G	G	G	A	A	A	A	A	G	G	A	A	A	A	A	A	G	G	G	A	A	A	A	A	A	A	G	A	A	G	A	A	A	G	A	G	G	G	A
S1B_663391970	G/T	1B	663391970	+	T	G	T	G	G	T	T	T	T	G	G	G	G	G	T	T	G	G	G	G	G	G	T	T	T	G	G	G	G	G	G	G	T	G	G	T	G	G	G	T	G	T	T	T	G
S1B_663414141	A/G	1B	663414141	+	G	A	G	A	G	G	G	G	G	A	A	A	A	A	G	G	A	A	A	A	A	A	G	G	G	A	A	A	A	A	A	A	G	A	A	G	A	A	A	G	A	G	G	G	A
S1B_663414150	T/C	1B	663414150	+	C	T	C	T	C	C	C	C	C	T	T	T	T	T	C	C	T	T	T	T	T	T	C	C	C	T	T	T	T	T	T	T	C	T	T	C	T	T	T	C	T	C	C	C	T
S1B_663414154	A/G	1B	663414154	+	G	A	G	A	G	G	G	G	G	A	A	A	A	A	G	G	A	A	A	A	A	A	G	G	G	A	A	A	A	A	A	A	G	A	A	G	A	A	A	G	A	G	G	G	A
S1B_663725815	A/T	1B	663725815	+	T	A	T	A	T	T	T	T	T	A	A	A	A	A	T	T	A	A	A	A	A	A	T	T	T	A	A	A	A	A	A	A	T	A	A	T	A	A	A	T	A	T	T	T	A
S1B_663958982	C/G	1B	663958982	+	C	C	C	C	C	C	C	C	C	C	C	C	C	S	C	C	C	C	S	S	C	S	C	C	C	C	C	G	C	C	C	C	C	C	C	C	C	C	C	C	S	C	C	C	C
S1B_663971302	A/G	1B	663971302	+	G	A	G	A	G	G	G	G	G	A	A	A	A	A	G	G	A	A	A	A	A	A	G	G	G	A	A	A	A	A	A	A	R	A	A	G	A	A	A	G	A	G	G	G	A
S1B_664488107	G/C	1B	664488107	+	C	G	C	G	C	C	C	C	C	G	G	G	G	G	C	C	G	G	G	G	G	G	C	C	C	G	G	G	G	G	G	G	C	G	G	C	G	G	G	C	G	C	C	C	G
S1B_664573920	G/A	1B	664573920	+	A	G	A	G	A	A	A	A	A	G	G	G	G	G	A	A	G	G	G	G	G	G	A	A	A	G	G	G	G	G	G	G	A	G	R	A	G	G	G	A	G	A	A	A	G
S1B_664582099	C/A	1B	664582099	+	A	C	A	C	A	A	A	A	A	C	C	C	C	C	A	A	C	C	C	C	C	C	A	A	A	C	C	C	C	C	C	C	A	C	C	A	C	C	C	A	C	A	A	A	C
S1B_664736870	G/C	1B	664736870	+	G	G	G	G	G	G	G	G	G	G	G	G	S	S	S	S	G	G	G	G	G	S	G	G	G	G	S	G	G	G	S	G	G	G	G	S	G	G	G	G	G	G	G	G	G
S1B_664806529	T/C	1B	664806529	+	C	T	C	T	C	C	C	C	C	T	T	T	T	T	C	C	T	T	T	T	T	T	C	C	C	T	T	T	T	T	T	T	C	T	T	C	T	T	T	C	T	C	C	C	T
S1B_665416653	G/A	1B	665416653	+	A	G	A	G	G	R	G	A	A	G	G	G	G	G	R	R	G	G	G	G	G	G	R	G	A	G	G	G	G	G	G	G	R	G	G	R	G	G	G	R	G	A	R	A	G
S1B_665416686	T/C	1B	665416686	+	C	T	C	T	T	Y	T	C	C	T	T	T	T	T	Y	Y	T	T	T	T	T	T	Y	T	C	T	T	T	T	T	T	T	Y	T	T	Y	T	T	T	Y	T	C	Y	C	T
S1B_665416687	G/A	1B	665416687	+	A	G	A	G	G	R	G	A	A	G	G	G	G	G	R	R	G	G	G	G	G	G	R	G	A	G	G	G	G	G	G	G	R	G	G	R	G	G	G	R	G	A	R	A	G
S1B_665655595	C/T	1B	665655595	+	T	C	T	C	T	T	T	T	T	C	C	C	C	C	T	T	C	C	C	C	C	C	T	T	T	C	C	C	C	C	C	C	T	C	C	T	C	C	C	T	C	T	T	T	C
S1B_665735207	A/G	1B	665735207	+	G	A	G	A	G	G	G	G	G	A	A	A	A	A	G	G	A	A	A	A	A	A	G	G	G	A	A	A	A	A	A	A	G	A	A	G	A	A	A	G	A	G	G	G	A
S1B_665763634	C/T	1B	665763634	+	T	C	T	C	T	T	T	T	T	C	C	C	C	C	T	T	C	C	C	C	C	C	T	T	T	C	C	C	C	C	C	C	T	C	C	T	C	C	C	T	C	T	T	T	C
S1B_665826499	T/C	1B	665826499	+	C	T	C	T	C	C	C	C	C	T	T	T	T	T	C	C	T	T	T	T	T	T	C	C	C	T	T	T	T	T	T	T	C	T	T	C	T	T	T	C	T	C	C	C	T
S1B_665826515	G/C	1B	665826515	+	C	G	C	G	C	C	C	C	C	G	G	G	G	G	C	C	G	G	G	G	G	G	C	C	C	G	G	G	G	G	G	G	C	G	G	C	G	G	G	C	G	C	C	C	G
S1B_666270247	C/T	1B	666270247	+	C	C	C	Y	T	T	C	C	C	C	C	C	C	C	C	C	C	C	C	C	C	C	C	C	C	C	C	C	C	C	C	C	Y	C	T	C	C	Y	C	C	C	C	C	C	C
S1B_666270258	A/G	1B	666270258	+	A	A	G	A	A	A	R	A	A	A	A	A	A	A	A	A	A	A	R	A	A	A	R	R	A	A	A	A	A	A	A	A	A	A	A	A	A	A	A	A	A	A	A	A	A
S1B_666280820	T/A	1B	666280820	+	A	A	A	T	A	A	A	W	A	T	T	A	A	A	A	A	A	A	T	A	A	T	A	A	A	T	A	T	A	T	T	T	A	T	T	A	T	T	T	A	T	A	A	A	T
S1B_666744613	G/A	1B	666744613	+	G	G	G	G	G	G	G	G	G	G	G	G	G	G	G	G	G	G	G	G	G	A	G	G	G	G	G	A	G	G	A	A	G	A	G	G	A	G	A	G	A	G	G	G	A
S1B_667864096	T/C	1B	667864096	+	T	T	T	T	Y	Y	T	T	T	T	T	T	T	T	Y	T	T	T	T	T	T	T	Y	Y	T	T	T	T	T	T	T	T	T	T	T	T	T	T	T	T	T	T	T	T	T
S1B_667864133	A/G	1B	667864133	+	A	A	A	A	R	R	A	A	A	A	A	A	A	A	R	A	A	A	A	A	A	A	R	R	A	A	A	A	A	A	A	A	A	A	A	A	A	A	A	A	A	A	A	A	A
S1B_668123824	C/A	1B	668123824	+	C	C	C	C	C	C	C	C	C	C	C	C	C	C	C	C	C	C	C	C	C	A	C	C	C	C	M	A	C	C	A	A	C	A	C	C	A	C	A	C	A	C	C	C	A
S1B_668398712	A/G	1B	668398712	+	A	A	A	A	A	A	A	A	A	A	A	A	A	A	A	A	A	A	A	A	A	G	A	A	A	A	A	G	A	A	G	G	A	G	A	A	G	A	G	A	G	A	A	A	G
S1B_668412426	T/C	1B	668412426	+	C	C	C	C	T	T	C	C	T	T	C	C	C	C	T	T	C	C	C	C	C	T	T	T	T	C	C	T	C	C	T	T	C	T	C	C	T	C	T	C	T	C	C	C	T
S1B_668521204	C/G	1B	668521204	+	C	G	C	C	C	C	C	C	C	C	S	C	C	C	C	C	C	S	C	S	C	C	C	C	C	S	C	C	G	C	C	C	C	C	S	C	C	C	C	C	C	C	C	C	C
S1B_668521233	C/T	1B	668521233	+	C	C	C	C	C	Y	T	C	C	C	C	C	C	C	C	C	C	C	T	C	C	Y	C	C	C	C	C	Y	C	C	C	Y	C	C	Y	C	Y	C	C	C	C	C	C	C	C
S1B_668705915	C/G	1B	668705915	+	C	S	C	C	C	C	C	C	S	S	C	S	S	S	S	C	S	S	C	G	S	S	C	C	C	C	S	C	G	C	C	C	C	C	C	C	C	C	C	C	C	C	C	C	C
S1B_668737715	G/A	1B	668737715	+	A	A	A	A	G	G	A	A	R	A	G	A	A	A	A	R	A	A	G	A	A	R	G	G	G	A	A	R	A	G	G	G	A	G	G	A	G	G	G	A	G	A	A	A	G
S1B_668737731	C/T	1B	668737731	+	C	Y	C	C	C	C	C	C	Y	Y	C	T	Y	Y	T	Y	T	Y	C	C	Y	Y	C	C	C	C	Y	Y	Y	C	C	C	C	C	C	C	C	C	C	C	C	C	C	C	C
S1B_668737764	G/C	1B	668737764	+	G	S	G	G	G	G	G	G	S	S	G	C	S	S	C	S	C	S	G	G	S	S	G	G	G	G	S	S	S	G	G	G	G	G	G	G	G	G	G	G	G	G	G	G	G
S1B_668876481	G/C	1B	668876481	+	G	G	G	G	G	G	G	G	G	G	C	G	G	G	G	G	G	G	C	G	G	C	G	G	G	G	G	C	G	C	C	C	G	C	C	G	C	C	C	G	C	G	G	G	C
S1B_669191544	C/T	1B	669191544	+	C	C	C	C	T	C	Y	Y	T	Y	Y	C	C	C	T	T	C	C	C	C	C	C	C	C	C	C	Y	C	C	Y	C	C	C	C	C	T	C	T	C	C	C	C	C	C	C
S1B_669191555	A/G	1B	669191555	+	A	A	A	A	G	A	R	R	G	R	R	A	A	A	G	G	A	A	A	A	A	A	A	A	A	A	R	A	A	R	A	A	A	A	A	G	A	G	A	A	A	A	A	A	A
S1B_669191581	A/G	1B	669191581	+	A	A	A	A	G	A	R	R	G	R	R	A	A	A	G	G	A	A	A	A	A	A	A	A	A	A	R	A	A	R	A	A	A	A	A	G	A	G	A	A	A	A	A	A	A
S1B_670020283	A/G	1B	670020283	+	A	A	G	A	G	G	A	G	G	G	A	A	A	A	G	G	A	A	A	A	A	A	G	G	G	A	A	A	A	A	A	A	A	A	A	A	A	A	A	A	A	A	A	A	A
S1B_670070694	G/C	1B	670070694	+	G	G	G	G	G	G	G	G	G	G	C	G	G	G	G	G	G	G	C	G	G	G	G	G	G	G	G	G	G	C	G	G	G	G	C	G	G	C	G	G	G	G	G	G	G
S1B_670079673	T/C	1B	670079673	+	T	T	T	T	T	T	T	T	C	T	C	T	T	T	T	T	T	T	C	T	T	T	T	T	T	T	T	T	T	C	T	T	T	T	C	T	T	C	T	T	T	T	T	T	T
S1B_670144970	G/C	1B	670144970	+	C	C	C	G	G	G	C	C	G	C	G	C	C	C	G	G	C	C	G	C	C	G	G	G	G	C	C	G	C	G	G	G	C	G	G	C	G	G	G	C	G	C	C	C	G
S1B_670144975	A/G	1B	670144975	+	A	A	A	G	A	A	A	A	A	A	A	A	A	A	A	A	A	A	A	A	A	G	A	A	A	A	A	G	A	A	G	G	A	G	A	A	G	A	G	A	G	A	A	A	G
S1B_670145017	C/T	1B	670145017	+	C	C	C	T	C	C	C	C	C	C	C	C	C	C	C	C	C	C	C	C	C	T	C	C	C	C	C	T	C	C	T	T	C	T	C	C	T	C	T	C	T	C	C	C	T
S1B_670486172	T/A	1B	670486172	+	W	T	T	T	T	T	T	T	T	T	T	T	A	T	T	T	T	T	T	T	W	T	T	T	T	T	T	T	T	T	W	A	T	T	T	T	T	T	T	T	T	T	T	T	T
S1B_670586974	C/A	1B	670586974	+	C	C	C	C	C	C	C	C	M	C	C	C	C	C	C	C	C	C	C	C	C	C	C	M	M	C	C	C	C	C	C	C	C	C	C	C	C	C	C	C	C	C	C	C	C
S1B_670754733	T/A	1B	670754733	+	A	A	A	T	T	T	A	A	T	T	T	A	A	A	T	T	A	A	T	A	A	T	T	T	T	A	A	T	A	T	T	T	A	T	T	A	T	T	T	A	T	A	A	A	T
S1B_671044161	C/T	1B	671044161	+	T	T	T	C	C	C	T	T	C	C	C	T	T	T	C	C	T	T	C	T	T	C	C	C	C	T	T	C	T	C	C	C	T	C	C	T	C	C	C	T	C	T	T	T	C
S1B_671161468	T/A	1B	671161468	+	A	A	A	T	T	T	A	A	T	T	T	A	A	A	T	T	A	A	T	A	A	T	T	T	T	A	A	T	A	T	T	T	A	T	T	A	T	T	T	A	T	A	A	A	T
S1B_671188840	G/A	1B	671188840	+	A	A	A	G	G	G	A	A	G	G	G	A	A	A	G	G	A	A	G	A	A	G	G	G	G	A	A	G	A	G	G	G	A	G	G	A	G	R	G	A	G	A	R	A	G
S1B_671265540	G/A	1B	671265540	+	A	R	G	A	A	A	R	R	A	R	A	G	G	G	A	A	G	G	G	G	G	G	A	A	A	G	G	G	G	G	G	G	G	G	G	R	G	R	G	G	G	G	G	G	G
S1B_671272069	A/C	1B	671272069	+	A	A	A	A	A	A	A	A	A	A	C	A	A	A	A	A	A	A	C	A	A	C	A	A	A	A	A	C	A	C	C	C	A	C	C	A	C	C	C	A	C	A	A	A	C
S1B_671396538	G/A	1B	671396538	+	G	G	G	G	A	A	G	G	A	G	G	G	G	G	A	R	G	G	G	G	G	G	A	A	A	G	G	G	G	G	G	G	G	G	G	G	G	G	G	G	G	G	G	G	G
S1B_671459809	C/G	1B	671459809	+	C	C	S	C	C	C	C	C	C	S	S	C	C	C	C	C	C	C	C	C	C	C	C	C	C	C	C	C	S	C	C	C	C	C	C	C	C	C	C	C	S	C	C	C	C
S1B_671562720	T/A	1B	671562720	+	T	T	T	W	W	W	T	T	T	T	T	T	T	T	T	T	T	W	T	T	T	T	T	T	T	T	T	T	T	T	T	T	T	W	T	W	T	T	T	T	T	T	T	T	T
S1B_671593634	G/T	1B	671593634	+	T	T	T	G	G	G	T	T	G	G	G	T	T	T	G	G	T	T	G	T	T	G	G	G	G	T	T	G	T	G	G	G	T	G	G	T	G	G	G	T	G	T	T	T	G
S1B_672144320	G/T	1B	672144320	+	K	K	G	G	G	G	K	K	G	G	G	K	T	G	G	G	K	K	G	T	K	G	G	G	G	K	G	G	G	G	G	G	G	G	G	G	G	G	G	G	G	K	K	G	G
S1B_672555976	A/G	1B	672555976	+	G	G	G	A	A	A	G	G	A	A	A	G	G	G	A	A	G	G	A	G	G	A	A	A	A	G	G	A	G	A	A	A	G	A	A	G	A	A	A	G	A	G	G	G	A
S1B_672558601	A/G	1B	672558601	+	G	G	G	A	A	A	G	G	A	A	A	G	G	G	A	A	G	G	A	G	G	A	A	A	A	G	G	A	G	A	A	A	G	A	A	G	A	A	A	G	A	G	G	G	A
S1B_672558625	C/T	1B	672558625	+	T	T	T	C	C	C	T	T	C	C	C	T	T	T	C	C	T	T	C	T	T	C	C	C	C	T	T	C	T	C	C	C	T	C	C	T	C	C	C	T	C	T	T	T	C
S1B_672558642	G/C	1B	672558642	+	C	C	C	G	G	G	C	C	G	G	G	C	C	C	G	G	C	C	G	C	C	G	G	G	G	C	C	G	C	G	G	G	C	G	G	C	G	G	G	C	G	C	C	C	G
S1B_672851353	T/C	1B	672851353	+	C	C	C	T	T	T	C	C	T	T	T	C	C	C	T	T	C	C	T	C	C	T	T	T	T	C	C	T	C	T	T	T	C	T	T	C	T	T	T	C	T	C	C	C	T
S1B_672853011	C/T	1B	672853011	+	T	T	T	C	C	C	T	T	C	C	C	T	T	T	C	C	T	T	C	T	T	C	C	C	C	T	T	C	T	C	C	C	T	C	C	T	C	C	C	T	C	T	T	T	C
S1B_673170982	G/A	1B	673170982	+	A	A	A	G	G	G	A	A	G	G	G	A	A	A	G	G	A	A	G	A	A	G	G	G	G	A	A	G	A	G	G	G	A	G	G	A	G	G	G	A	G	A	A	A	G
S1B_673666829	C/G	1B	673666829	+	G	G	G	C	G	G	G	G	G	G	C	G	G	G	G	G	G	G	C	G	G	C	G	G	G	G	G	C	G	C	C	C	G	C	C	G	C	C	C	G	C	G	G	G	C
S1B_673997633	A/G	1B	673997633	+	G	G	G	A	G	A	G	G	A	A	A	G	G	G	A	A	G	G	A	G	G	A	A	A	A	G	G	A	G	A	A	A	G	A	A	G	A	A	A	G	A	G	G	G	A
S1B_673997644	T/G	1B	673997644	+	G	G	G	T	G	T	G	G	T	T	T	G	G	G	T	T	G	G	T	G	G	T	T	T	T	G	G	T	G	T	T	T	G	T	T	G	T	T	T	G	T	G	G	G	T
S1B_673997662	C/T	1B	673997662	+	T	T	T	C	T	C	T	T	C	C	C	T	T	T	C	C	T	T	C	T	T	C	C	C	C	T	T	C	T	C	C	C	T	C	C	T	C	C	C	T	C	T	T	T	C
S1B_673997664	G/A	1B	673997664	+	G	G	G	G	G	A	G	G	A	G	G	G	G	G	A	A	G	G	G	G	G	G	A	A	A	G	G	G	G	G	G	G	G	G	G	G	G	G	G	G	G	G	G	G	G
S1B_673997720	A/G	1B	673997720	+	A	A	A	A	A	G	A	A	G	A	A	A	A	A	G	G	A	A	A	A	A	A	G	G	G	A	A	A	A	A	A	A	A	A	A	A	A	A	A	A	A	A	A	A	A
S1B_673997728	G/A	1B	673997728	+	G	G	G	G	G	A	G	G	A	G	G	G	G	G	A	A	G	G	G	G	G	G	A	A	A	G	G	G	G	G	G	G	G	G	G	G	G	G	G	G	G	G	G	G	G
S1B_674001608	C/T	1B	674001608	+	C	C	C	T	C	C	C	C	C	C	T	C	C	C	C	C	C	C	T	C	C	T	C	C	C	C	C	T	C	T	T	T	C	T	T	C	T	T	T	C	T	C	C	C	T
S1B_674004132	C/G	1B	674004132	+	G	G	G	C	G	G	G	G	G	C	C	G	G	G	G	G	G	G	C	G	G	C	G	G	G	G	G	C	G	C	C	C	G	C	C	G	C	S	C	G	C	G	G	G	C
S1B_674511928	C/G	1B	674511928	+	G	G	G	C	G	G	G	G	G	G	C	G	G	G	G	G	G	G	C	G	G	C	G	G	G	G	G	C	G	C	C	C	C	C	C	G	C	C	C	G	C	G	G	G	C
S1B_674511936	G/T	1B	674511936	+	G	G	G	G	T	T	G	G	T	T	G	G	G	G	T	T	G	G	G	G	G	G	T	T	T	G	G	G	G	G	G	G	G	G	G	G	G	G	G	G	G	G	G	G	G
S1B_674511950	T/C	1B	674511950	+	T	T	T	T	C	C	T	T	C	C	T	T	T	T	C	C	T	T	T	T	T	T	C	C	C	T	T	T	T	T	T	T	T	T	T	T	T	T	T	T	T	T	T	T	T
S1B_674511954	T/C	1B	674511954	+	T	T	T	T	C	C	T	T	C	C	T	T	T	T	C	C	T	T	T	T	T	T	C	C	C	T	T	T	T	T	T	T	T	T	T	T	T	T	T	T	T	T	T	T	T
S1B_674610119	A/G	1B	674610119	+	A	R	A	A	A	A	A	A	A	A	A	R	A	A	A	A	A	A	A	A	A	A	A	A	A	R	A	A	R	A	A	A	A	A	R	A	R	A	A	A	A	A	A	A	A
S1B_674623942	G/A	1B	674623942	+	G	G	G	G	G	A	G	G	A	G	G	G	G	G	A	A	G	G	G	G	G	G	A	A	A	G	G	G	G	G	G	G	G	G	G	G	G	G	G	G	G	G	G	G	G
S1B_674777573	T/A	1B	674777573	+	T	T	T	A	T	T	T	T	T	T	A	T	T	T	T	T	T	T	A	T	T	A	T	T	T	T	T	A	T	A	A	A	T	A	A	T	A	A	A	T	A	T	T	T	A
S1B_675147009	G/A	1B	675147009	+	G	G	G	G	R	A	G	G	R	G	G	G	G	G	G	R	G	G	G	G	G	G	A	A	R	G	G	G	G	G	G	G	G	G	G	G	G	G	G	G	G	G	G	G	G
S1B_675182608	C/T	1B	675182608	+	T	T	T	C	C	C	T	T	C	T	C	T	T	T	C	C	T	T	C	T	T	C	T	T	T	T	T	C	T	C	C	C	T	C	C	T	C	C	C	T	C	T	T	T	C
S1B_675182616	C/T	1B	675182616	+	T	T	T	C	C	C	T	T	C	T	C	T	T	T	C	C	T	T	C	T	T	C	T	T	T	T	T	C	T	C	C	C	T	C	C	T	C	C	C	T	C	T	T	T	C
S1B_675446250	T/C	1B	675446250	+	C	C	C	T	T	T	C	C	T	C	T	C	C	C	T	T	C	C	T	C	C	T	C	C	C	C	C	T	C	T	T	T	C	T	T	C	T	T	T	C	T	C	C	C	T
S1B_675648992	C/T	1B	675648992	+	T	T	T	C	T	T	T	T	T	T	C	T	T	T	T	T	T	T	C	T	T	C	T	T	T	T	T	C	T	C	C	C	T	C	C	T	C	C	C	T	C	T	T	T	C
S1B_675649069	G/A	1B	675649069	+	A	A	A	G	A	A	A	A	A	A	G	A	A	A	A	A	A	A	G	A	A	G	A	A	R	A	A	G	A	G	G	G	A	G	G	A	G	G	G	A	G	A	A	A	G
S1B_675950573	G/A	1B	675950573	+	G	G	G	G	G	G	G	G	G	G	G	G	G	G	G	G	G	G	G	G	G	R	G	G	G	G	G	A	G	G	A	A	G	A	G	G	A	G	A	G	A	G	G	G	A
S1B_675951164	C/T	1B	675951164	+	T	T	T	C	T	C	T	T	C	T	C	T	T	T	C	C	T	T	C	T	T	C	T	T	T	T	T	C	T	C	C	C	T	C	C	T	C	C	C	T	C	T	T	T	C
S1B_675973894	C/G	1B	675973894	+	C	C	C	G	C	C	C	C	C	C	C	C	C	C	C	C	C	C	C	C	C	C	C	C	C	C	C	C	C	C	C	C	C	C	C	C	C	C	C	C	C	C	C	C	C
S1B_675973953	C/T	1B	675973953	+	C	C	C	T	C	C	C	C	C	C	C	C	C	C	C	C	C	C	C	C	C	C	C	C	C	C	C	C	C	C	C	C	C	C	C	C	C	C	C	C	C	C	C	C	C
S1B_675973954	G/T	1B	675973954	+	T	T	T	G	T	G	T	T	G	T	G	T	T	T	G	G	T	T	G	T	T	G	T	T	T	T	T	G	T	G	G	G	T	G	G	T	G	G	G	T	G	T	T	T	G
S1B_675981016	A/G	1B	675981016	+	A	A	A	A	A	A	A	A	A	A	A	A	A	A	A	A	A	A	A	A	A	G	A	A	A	A	A	G	A	A	G	G	A	G	A	A	G	A	G	A	G	A	A	A	G
S1B_676076468	C/T	1B	676076468	+	C	C	C	C	C	C	C	C	C	C	C	C	C	C	C	C	C	C	C	C	C	T	C	C	C	C	C	T	C	C	T	T	C	T	C	C	T	C	T	C	T	C	C	C	T
S1B_676255772	C/T	1B	676255772	+	C	C	C	C	C	C	C	C	C	C	C	C	C	C	C	C	C	C	C	C	C	T	C	C	C	C	C	T	C	C	T	T	C	T	C	C	T	C	T	C	T	C	C	C	T
S1B_676322959	C/T	1B	676322959	+	T	T	T	C	C	C	T	T	C	T	C	T	T	T	C	C	T	T	C	T	T	C	T	T	T	T	T	C	T	C	C	C	T	C	C	T	C	C	C	T	C	T	T	T	C
S1B_676322965	G/A	1B	676322965	+	A	A	A	G	G	G	A	A	G	A	G	A	A	A	G	G	A	A	G	A	A	G	A	A	A	A	A	G	A	G	G	G	A	G	G	A	G	G	G	A	G	A	A	A	G
S1B_676322969	C/G	1B	676322969	+	G	G	G	C	C	C	G	G	C	G	C	G	G	G	C	C	G	G	C	G	G	C	G	G	G	G	G	C	G	C	C	C	G	C	C	G	C	C	C	G	C	G	G	G	C
S1B_676322974	A/G	1B	676322974	+	G	G	G	A	A	A	G	G	A	G	A	G	G	G	A	A	G	G	A	G	G	A	G	G	G	G	G	A	G	A	A	A	G	A	A	G	A	A	A	G	A	G	G	G	A
S1B_676416566	G/T	1B	676416566	+	G	T	G	G	G	T	G	T	G	K	G	T	K	K	K	T	G	G	T	K	T	G	G	G	G	K	K	G	K	G	G	G	G	G	G	G	G	G	G	G	G	G	G	K	G
S1B_676416596	C/T	1B	676416596	+	C	T	C	C	C	T	C	T	C	Y	C	T	Y	Y	Y	T	C	C	T	Y	T	C	C	C	C	Y	Y	C	Y	C	C	C	C	C	C	C	C	C	C	C	C	C	C	Y	C
S1B_676515288	G/C	1B	676515288	+	C	C	C	G	G	G	C	C	G	C	G	C	C	C	G	G	C	C	G	C	C	G	C	C	C	C	C	G	C	G	G	G	C	G	G	C	G	G	G	C	G	C	C	C	G
S1B_676515304	C/T	1B	676515304	+	C	C	C	C	C	C	C	C	C	C	C	C	C	C	C	C	C	C	C	C	C	T	C	C	C	C	C	T	C	C	T	T	C	T	C	C	T	C	T	C	T	C	C	C	T
S1B_676608655	G/A	1B	676608655	+	A	A	A	G	G	G	A	A	G	A	G	A	A	A	G	G	A	A	G	A	A	G	A	A	A	A	A	G	A	G	G	G	A	G	G	A	G	G	G	A	G	A	A	A	G
S1B_676635525	C/T	1B	676635525	+	C	C	C	C	C	C	C	C	C	C	Y	C	C	C	C	C	C	C	C	C	C	C	C	C	C	C	C	C	C	C	C	C	C	C	C	C	C	C	C	Y	C	C	C	C	C
S1B_676670269	C/A	1B	676670269	+	C	C	C	C	C	C	C	C	C	C	C	C	C	C	C	C	C	C	C	C	C	A	C	C	C	C	C	A	C	C	A	A	C	A	C	C	A	C	A	C	A	C	C	C	A
S1B_676670310	C/T	1B	676670310	+	T	T	T	C	C	C	T	T	C	T	C	T	T	T	C	C	T	T	C	T	T	C	T	T	T	T	T	C	T	C	C	C	T	C	C	T	C	C	C	T	C	T	T	T	C
S1B_676685136	C/A	1B	676685136	+	C	C	C	M	C	C	C	C	C	C	C	M	C	C	C	C	M	C	C	C	C	C	C	C	C	C	C	M	C	M	C	C	M	M	C	C	C	M	C	M	M	C	C	C	C
S1B_676685141	G/A	1B	676685141	+	G	G	G	R	G	G	G	G	G	G	G	R	G	G	G	G	R	G	G	G	G	G	G	G	G	G	G	R	G	R	G	G	R	R	G	G	G	R	G	R	R	G	G	G	G
S1B_677009056	T/C	1B	677009056	+	T	T	T	T	T	T	T	T	T	T	T	T	T	T	T	T	T	T	T	T	T	C	T	T	T	T	T	C	T	T	C	C	T	C	T	T	C	T	C	T	C	T	T	T	C
S1B_677511389	A/G	1B	677511389	+	A	A	A	A	A	A	A	A	A	A	A	A	R	A	A	A	A	R	A	A	G	A	A	A	A	A	R	A	A	A	R	R	A	A	A	R	A	A	R	A	A	A	R	A	A
S1B_677556662	C/G	1B	677556662	+	C	C	C	C	C	C	C	C	C	C	C	C	C	C	C	C	C	S	C	C	C	C	C	C	C	C	G	C	C	C	S	S	C	C	C	S	C	C	S	C	C	C	C	C	C
S1B_677556837	T/A	1B	677556837	+	T	T	T	T	W	T	T	T	W	W	T	T	T	T	T	T	T	T	W	W	T	W	T	W	T	T	T	T	W	T	T	T	T	T	T	T	T	T	T	T	W	T	T	T	T
S1B_678101355	G/A	1B	678101355	+	G	A	G	G	G	G	G	G	G	G	G	G	R	R	G	G	G	R	R	R	G	G	G	G	R	R	G	G	R	G	R	A	G	G	G	G	R	G	A	G	R	G	G	G	G
S1B_678303793	C/T	1B	678303793	+	Y	C	C	Y	C	C	C	C	C	C	Y	C	C	C	C	C	C	C	C	C	C	C	Y	Y	Y	C	C	C	C	C	C	C	Y	C	C	Y	C	Y	C	T	C	Y	C	C	C
S1B_678722465	G/A	1B	678722465	+	G	G	G	A	G	G	G	G	G	G	G	G	G	G	G	G	G	G	G	G	G	G	G	G	G	G	G	G	G	G	G	G	G	G	G	G	G	G	G	G	G	G	G	G	G
S1B_679132716	G/A	1B	679132716	+	G	G	G	G	G	G	G	G	G	G	A	G	G	G	G	G	G	G	G	G	G	A	G	G	G	G	G	A	G	A	A	A	G	A	A	G	A	A	A	G	A	G	G	G	A
S1B_679132754	T/C	1B	679132754	+	T	T	T	T	T	T	T	T	T	T	C	T	T	T	T	T	T	T	T	T	T	C	T	T	T	T	T	C	T	C	C	C	T	C	C	T	C	C	C	T	C	T	T	T	C
S1B_679487928	G/T	1B	679487928	+	G	G	G	G	G	G	G	G	T	G	G	G	G	G	G	G	G	G	T	G	G	G	G	G	G	G	G	G	G	G	G	G	G	G	G	G	G	G	G	G	G	G	G	G	G
S1B_679752007	C/T	1B	679752007	+	T	T	T	C	C	C	T	T	C	T	C	T	T	T	T	T	T	T	C	T	T	C	T	T	T	T	T	C	T	C	C	C	T	C	C	T	C	C	C	T	C	T	T	T	C
S1B_679791437	C/T	1B	679791437	+	Y	C	C	C	C	C	C	C	C	C	Y	C	C	C	C	C	C	C	C	C	C	C	T	Y	Y	C	C	C	Y	T	C	C	T	C	T	C	C	Y	C	Y	C	Y	Y	C	C
S1B_681132652	T/A	1B	681132652	+	T	T	T	T	T	T	T	A	T	T	T	T	T	T	T	W	T	W	T	T	W	T	T	T	T	T	A	T	T	T	W	T	T	T	T	T	T	W	W	T	T	A	T	T	T
S1B_681132660	T/A	1B	681132660	+	W	T	T	T	T	T	T	T	T	T	T	T	T	T	W	T	T	T	T	T	T	T	T	T	T	T	T	T	T	T	T	T	T	T	T	T	T	T	T	T	T	T	W	T	T
S1B_681132667	T/A	1B	681132667	+	T	T	T	A	T	T	T	T	T	T	T	T	T	T	T	T	T	T	T	T	W	T	T	T	T	T	T	T	W	T	T	T	T	W	T	T	T	T	T	T	T	T	T	T	T
S1B_681132670	T/C	1B	681132670	+	T	C	T	T	T	T	T	T	T	T	Y	Y	C	T	T	Y	T	T	T	T	T	Y	T	T	T	T	T	Y	Y	T	T	T	C	T	T	T	T	T	T	T	Y	T	T	C	T
S1B_681132678	A/G	1B	681132678	+	A	A	A	A	A	A	A	A	A	A	A	R	A	A	R	A	A	A	A	A	R	R	A	A	A	A	A	R	R	A	A	R	A	A	A	A	R	A	A	A	R	A	A	A	A
S1B_682101270	C/T	1B	682101270	+	C	C	C	C	C	C	C	C	C	C	T	C	C	C	C	C	C	C	C	C	C	T	C	C	C	C	C	T	C	T	T	T	C	T	T	C	T	T	T	C	T	C	C	C	T
S1B_682126148	G/A	1B	682126148	+	G	G	G	A	A	A	G	G	G	G	G	G	G	G	G	G	G	G	G	G	G	G	G	G	G	G	G	G	G	G	G	G	G	G	G	G	G	A	G	G	G	G	G	G	G
S1B_682126181	C/A	1B	682126181	+	C	C	C	C	C	C	C	C	C	C	A	C	C	C	C	C	C	C	C	C	C	A	C	C	C	C	C	A	C	A	A	A	C	A	A	C	A	A	A	C	A	C	C	C	A
S1B_682148879	A/T	1B	682148879	+	A	A	A	A	A	A	A	A	A	A	T	A	A	A	A	A	A	A	A	A	A	T	A	A	A	A	A	T	A	T	T	T	A	T	T	A	T	T	T	A	T	A	A	A	T
S1B_682148890	C/G	1B	682148890	+	G	G	G	C	C	C	G	G	G	G	C	G	G	G	G	G	G	G	G	G	G	C	G	G	G	G	G	C	G	C	C	C	G	C	C	G	C	C	C	G	C	G	G	G	C
S1B_682197072	T/C	1B	682197072	+	T	T	T	T	T	T	T	T	C	Y	T	T	T	T	T	T	T	T	C	T	T	T	T	T	T	T	T	T	T	T	T	T	T	T	T	T	T	T	T	T	T	T	T	T	T
S1B_682339625	G/C	1B	682339625	+	G	G	G	C	G	G	G	G	C	C	G	G	G	G	G	G	G	G	C	G	G	G	G	G	G	S	G	G	G	G	G	G	G	G	G	G	G	G	G	G	G	G	G	G	G
S1B_682503397	G/A	1B	682503397	+	A	A	A	G	G	G	A	A	A	A	G	A	A	A	A	A	A	A	G	A	A	G	A	A	A	A	A	G	A	G	G	G	A	G	G	A	G	G	G	A	G	A	A	A	G
S1B_682558120	T/C	1B	682558120	+	T	T	T	T	C	C	T	T	T	T	C	T	T	T	T	T	T	T	T	T	T	C	T	T	T	T	T	C	T	C	C	C	T	C	C	T	C	C	C	T	C	T	T	T	C
S1B_683050409	G/A	1B	683050409	+	A	A	A	G	G	G	A	A	G	A	G	A	A	A	A	A	A	A	G	A	A	G	A	A	A	A	A	G	A	G	G	G	A	G	G	A	G	G	G	A	G	A	A	A	G
S1B_683207780	C/G	1B	683207780	+	C	C	C	C	G	G	C	C	C	C	G	C	C	C	C	C	C	C	C	C	C	G	C	C	C	C	C	G	C	G	G	G	C	G	G	C	G	G	G	C	G	C	C	C	G
S1B_683268476	A/C	1B	683268476	+	A	A	A	A	C	C	A	A	A	A	C	A	A	A	A	A	A	A	A	A	A	C	A	A	A	A	A	C	A	C	C	C	A	C	C	A	C	C	C	A	C	A	A	A	C
S1B_683834569	A/C	1B	683834569	+	M	A	M	M	M	A	M	M	A	A	A	A	A	A	A	A	A	A	A	A	A	A	A	A	A	A	A	A	M	A	A	A	M	A	A	M	A	A	A	M	A	M	M	A	A
S1B_683834570	G/A	1B	683834570	+	G	R	G	R	G	A	G	G	G	R	G	A	A	G	G	G	A	A	G	R	G	G	G	G	G	R	R	R	G	G	G	G	G	G	G	G	G	G	G	G	G	G	G	G	G
S1B_683834571	C/T	1B	683834571	+	Y	C	Y	Y	Y	C	Y	Y	C	C	C	C	C	C	C	C	C	C	C	C	C	C	C	C	C	C	C	C	Y	C	C	C	Y	C	C	Y	C	C	C	Y	C	Y	Y	C	C
S1B_683837648	G/A	1B	683837648	+	G	G	G	A	R	G	G	G	G	G	G	G	G	G	G	G	G	G	G	G	G	G	G	G	G	G	G	G	R	G	G	G	G	G	G	G	G	G	G	G	G	A	G	G	G
S1B_683837679	C/A	1B	683837679	+	C	C	C	C	C	C	C	C	C	M	M	C	C	C	C	C	C	C	C	C	C	M	C	C	C	C	C	C	C	C	A	M	C	M	A	C	M	A	A	C	M	C	C	C	M
S1B_683946607	C/T	1B	683946607	+	C	C	C	T	C	C	C	C	T	C	C	C	C	C	C	C	C	C	T	C	C	C	C	C	C	C	C	C	C	C	C	C	C	C	C	C	C	C	C	C	C	C	C	C	C
S1B_683946623	C/T	1B	683946623	+	C	C	C	T	C	C	C	C	T	C	C	C	C	C	C	C	C	C	T	C	C	C	C	C	C	C	C	C	C	C	C	C	C	C	C	C	C	C	C	C	C	C	C	C	C
S1B_683947654	C/T	1B	683947654	+	C	C	C	T	C	C	C	C	T	C	C	C	C	C	Y	C	C	C	T	C	C	C	C	C	C	C	C	C	C	C	C	C	C	C	C	C	C	C	C	C	C	C	C	C	C
S1B_683947663	C/T	1B	683947663	+	C	C	C	C	C	C	C	C	T	C	C	C	C	C	C	C	C	C	Y	C	C	C	C	C	C	C	C	C	C	C	C	C	C	C	C	C	C	C	C	C	C	C	C	C	C
S1B_683947677	T/C	1B	683947677	+	T	T	T	C	T	T	T	T	T	T	T	T	T	T	Y	T	T	T	Y	T	T	T	T	T	T	T	T	T	T	T	T	T	T	T	T	T	T	T	T	T	T	T	T	T	T
[truncated: 32,811 more rows]
[truncated: 111 more columns]

## Sheet: Table S3
Table S3. The GBS dataset based on Ae. tauschii Aet v4.0 genome
rs#	alleles	chrom	pos	strand	TA4153-11	TA4153-12	TA4153-7	TA4153-8	TA4153-9	TA4153-10	TA4153-3	TA4153-4	TA4153-5	TA4153-6	TA4153-13	TA4153-14	TA4153-19	TA4153-20	TA4153-21	TA4153-22	TA4153-15	TA4153-16	TA4153-17	TA4153-18	TA4153-23	TA4153-24	TA4153-30	TA4153-31	TA4153-32	TA4153-26	TA4153-27	TA4153-28	TA4153-29	TA4153-33	SW1	SW2	TA4152-1	SW3	TA4152-2	TA4152-7	SW9	TA4152-8	SW10	TA4152-9	SW4	TA4152-3	TA4152-4	TA4152-5	SW7
S1D_196136	T/C	1D	196136	+	T	T	T	T	T	T	T	T	T	T	T	T	C	T	T	T	T	C	T	T	T	T	T	T	T	T	C	T	T	T	C	C	T	T	T	C	T	T	C	T	T	T	T	T	T
S1D_223206	G/A	1D	223206	+	G	G	G	G	G	G	G	G	G	G	G	G	R	G	G	G	G	A	G	G	G	G	G	G	G	G	G	G	G	G	G	R	G	G	G	R	G	G	R	G	G	G	G	G	G
S1D_309468	C/T	1D	309468	+	C	C	C	C	C	C	C	C	C	C	C	C	Y	C	C	C	C	Y	C	C	C	C	C	C	C	C	Y	C	C	C	C	C	C	C	C	Y	C	C	C	C	C	C	C	C	C
S1D_523387	G/A	1D	523387	+	A	G	G	G	G	G	A	G	G	G	G	G	G	G	G	G	A	G	A	G	G	G	G	A	G	G	G	G	G	A	G	G	G	G	G	G	G	G	G	A	G	A	G	A	G
S1D_528363	G/A	1D	528363	+	A	G	G	G	G	G	A	G	G	G	G	G	G	G	G	G	A	A	A	G	G	G	G	A	G	G	A	G	G	A	A	A	G	G	G	A	G	G	A	A	G	A	G	A	G
S1D_528375	G/A	1D	528375	+	G	G	G	A	A	G	G	G	A	A	G	A	G	A	A	A	G	G	G	G	G	A	A	G	G	A	G	G	G	G	G	G	A	A	A	G	G	A	G	G	A	G	G	G	G
S1D_545049	G/C	1D	545049	+	G	S	S	G	G	G	G	G	G	S	G	G	G	G	G	G	G	G	G	G	G	S	G	G	G	G	G	G	G	G	G	S	G	G	G	S	G	G	G	G	G	G	G	G	G
S1D_545054	A/G	1D	545054	+	A	R	R	A	A	A	A	A	A	R	A	A	A	A	A	A	A	A	A	A	A	R	A	A	A	A	A	A	A	A	A	R	A	A	A	R	A	A	A	A	A	A	A	A	A
S1D_545070	C/G	1D	545070	+	C	S	S	C	C	C	C	C	C	S	C	C	C	C	C	C	C	C	C	C	C	S	C	C	C	C	C	C	C	C	C	S	C	C	C	S	C	C	C	C	C	C	C	C	C
S1D_545099	C/A	1D	545099	+	C	M	M	C	C	C	C	C	C	M	C	C	C	C	C	C	C	C	C	C	C	M	C	C	C	C	C	C	C	C	C	M	C	C	C	M	C	C	C	C	C	C	C	C	C
S1D_1143002	T/C	1D	1143002	+	T	Y	T	T	T	T	T	T	T	T	T	Y	T	T	T	Y	T	T	T	T	T	T	T	T	T	Y	T	T	T	T	T	T	T	T	Y	T	T	T	T	T	T	T	T	T	T
S1D_1435840	G/C	1D	1435840	+	G	G	G	G	C	G	G	G	G	G	G	G	G	G	S	C	G	G	G	G	G	S	G	G	G	S	G	G	G	G	G	G	G	G	G	G	G	G	G	G	S	G	G	G	G
S1D_1590878	A/C	1D	1590878	+	A	A	A	A	M	A	A	M	A	A	M	A	A	A	A	A	A	A	A	A	A	A	A	A	A	A	M	A	A	C	A	A	A	A	A	A	A	A	A	A	A	A	M	A	A
S1D_1590891	C/A	1D	1590891	+	C	C	C	C	C	C	C	M	C	C	M	C	C	C	C	C	C	C	C	C	C	C	C	C	C	C	M	C	C	A	C	C	C	C	C	C	C	C	C	C	C	C	M	C	C
S1D_1590919	G/A	1D	1590919	+	G	G	G	G	R	G	G	R	G	R	R	G	G	G	G	G	G	G	G	G	G	G	G	G	G	G	R	G	G	A	G	G	G	G	G	G	G	G	G	G	G	G	R	G	G
S1D_1590960	C/G	1D	1590960	+	S	C	C	C	C	C	S	C	S	C	C	C	C	C	C	C	S	C	S	C	C	C	C	S	C	C	C	C	C	C	C	C	C	C	C	C	C	C	C	S	C	G	C	S	C
S1D_1590961	G/A	1D	1590961	+	R	G	G	G	G	G	R	G	R	G	G	G	G	G	G	G	R	G	R	G	G	G	G	R	G	G	G	G	G	G	G	G	G	G	G	G	G	G	G	R	G	A	G	R	G
S1D_1640854	A/G	1D	1640854	+	R	A	A	A	A	A	A	A	A	A	R	A	A	A	A	A	A	A	R	A	A	R	A	A	A	A	G	A	A	R	A	A	A	A	A	A	A	A	A	A	A	R	A	A	A
S1D_1678107	G/A	1D	1678107	+	G	R	G	R	R	G	G	G	G	G	G	G	G	G	G	R	G	G	G	G	G	G	G	G	G	G	G	R	G	G	G	G	R	G	G	G	G	G	G	G	R	G	G	G	G
S1D_1678108	C/T	1D	1678108	+	C	Y	C	Y	Y	C	C	C	C	C	C	Y	Y	Y	C	Y	C	C	Y	C	C	C	C	C	C	C	C	Y	C	C	C	C	Y	C	C	C	C	C	C	C	Y	C	C	C	C
S1D_1707853	G/A	1D	1707853	+	G	G	G	G	R	R	G	G	R	G	G	G	R	G	G	R	G	R	G	G	G	G	G	G	G	R	G	R	G	R	G	G	G	R	G	G	G	G	G	G	G	G	G	G	G
S1D_1707859	C/G	1D	1707859	+	S	C	S	S	C	C	C	C	C	C	S	S	C	C	C	C	S	C	C	C	C	C	C	C	C	C	S	S	C	S	C	C	C	C	G	C	C	C	C	C	C	C	C	C	C
S1D_1707863	C/T	1D	1707863	+	Y	C	Y	Y	C	C	C	C	C	C	Y	Y	C	C	C	C	Y	C	C	C	C	C	C	C	C	C	Y	Y	C	Y	C	C	C	C	T	C	C	C	C	C	C	C	C	C	C
S1D_1707874	C/T	1D	1707874	+	C	C	C	C	Y	C	C	C	C	C	C	C	C	C	C	C	C	C	C	C	C	C	C	C	C	Y	C	Y	C	C	C	C	C	C	C	Y	C	C	C	C	C	Y	Y	C	C
S1D_1707883	G/A	1D	1707883	+	G	G	G	G	G	G	G	G	G	G	R	G	G	G	G	G	G	G	G	R	R	G	G	R	G	R	G	G	G	G	G	G	G	G	G	G	G	G	G	G	G	G	G	G	G
S1D_1707886	G/A	1D	1707886	+	G	G	R	G	G	G	G	G	A	G	R	G	G	G	G	G	G	R	G	G	G	G	G	G	G	G	R	G	G	G	G	G	G	G	G	G	G	G	G	G	G	G	G	G	G
S1D_1707889	G/A	1D	1707889	+	G	R	G	G	G	G	G	G	G	G	G	R	G	G	G	G	G	G	G	G	G	G	G	G	G	G	G	G	G	G	G	G	G	G	G	G	G	G	G	G	G	G	G	G	A
S1D_2189876	T/G	1D	2189876	+	T	T	T	T	T	T	T	T	T	T	T	T	K	T	T	T	T	K	T	T	T	T	T	T	T	T	K	T	T	T	T	T	T	T	T	T	T	T	G	T	T	T	T	T	T
S1D_2189877	G/T	1D	2189877	+	G	G	G	G	G	G	G	G	G	G	G	G	K	G	G	G	G	K	G	G	G	G	G	G	G	G	K	G	G	G	G	G	G	G	G	G	G	G	T	G	G	G	G	G	G
S1D_2415238	G/A	1D	2415238	+	G	G	G	G	G	G	G	G	G	G	G	G	G	G	G	G	G	G	G	G	G	G	G	R	R	G	R	G	G	G	G	G	G	G	R	G	G	G	G	G	G	R	G	G	G
S1D_2415239	C/T	1D	2415239	+	C	C	Y	C	C	C	C	Y	C	C	C	C	C	C	Y	C	C	C	C	T	C	C	C	Y	C	C	C	C	C	C	C	C	C	C	C	C	C	C	C	C	C	Y	C	C	C
S1D_2415241	G/C	1D	2415241	+	G	G	S	G	G	G	G	G	G	G	S	G	G	G	G	G	G	G	G	G	G	G	G	G	G	G	G	G	G	G	G	G	G	G	G	G	G	G	G	G	C	G	G	G	G
S1D_2415249	A/C	1D	2415249	+	A	A	A	A	A	A	A	A	A	A	A	A	A	A	A	A	A	A	A	A	A	A	M	A	A	A	A	A	A	C	A	A	A	M	A	A	M	A	A	A	A	A	A	A	A
S1D_2415252	C/A	1D	2415252	+	M	C	C	C	C	C	M	C	C	C	C	C	C	C	C	C	C	C	C	C	M	C	C	C	C	C	C	C	C	C	C	C	C	C	C	C	C	C	M	C	C	M	C	C	C
S1D_2415273	C/T	1D	2415273	+	C	C	Y	C	C	C	C	Y	C	C	C	C	C	Y	Y	C	C	C	C	T	C	C	C	Y	C	C	C	C	T	C	C	C	C	C	C	C	C	C	C	C	C	Y	C	C	C
S1D_2415274	G/A	1D	2415274	+	G	G	R	G	G	G	G	R	G	G	G	G	G	G	R	G	G	G	G	A	G	G	G	R	G	G	G	G	G	G	G	G	G	G	G	G	G	G	G	G	G	R	G	G	G
S1D_2415291	C/T	1D	2415291	+	C	C	C	C	C	C	C	Y	C	C	C	C	C	C	Y	C	C	C	C	C	Y	C	C	C	C	C	C	C	C	C	C	C	Y	C	C	C	C	C	C	C	C	C	C	C	C
S1D_2531322	C/G	1D	2531322	+	G	C	C	S	G	S	G	C	G	G	C	G	C	C	G	G	S	C	G	S	S	G	S	S	C	S	C	C	C	G	C	C	G	S	G	C	C	G	C	G	S	G	C	G	C
S1D_2587634	C/G	1D	2587634	+	C	C	C	C	C	C	C	C	C	C	C	C	S	C	C	C	C	S	C	C	C	C	C	C	C	C	G	C	C	C	C	C	C	C	C	S	C	C	S	C	C	C	C	C	C
S1D_2591547	G/C	1D	2591547	+	G	C	C	G	G	G	G	C	G	G	C	G	C	C	G	G	G	C	G	G	G	G	G	G	C	G	C	C	C	G	C	C	G	G	G	C	G	G	C	G	G	G	C	G	C
S1D_2904692	C/A	1D	2904692	+	C	C	C	C	C	C	C	C	C	C	C	C	A	C	C	C	C	M	C	C	C	C	C	C	C	C	M	C	C	C	M	M	C	C	C	M	C	C	M	C	C	C	C	C	C
S1D_2966883	T/G	1D	2966883	+	T	T	T	T	T	T	T	T	T	T	T	T	G	T	T	T	T	G	T	T	T	T	T	T	T	T	G	T	T	T	G	G	T	T	T	G	T	T	G	T	T	T	G	T	T
S1D_2966945	G/A	1D	2966945	+	G	G	G	G	G	G	G	G	G	G	G	G	A	G	G	G	G	R	G	G	G	G	G	G	G	G	R	G	G	G	A	R	G	G	G	A	G	G	G	G	G	G	A	G	G
S1D_3086570	G/A	1D	3086570	+	G	G	G	G	G	G	G	G	G	G	G	G	G	G	G	G	G	G	G	R	G	G	G	G	G	G	G	G	G	G	G	G	G	G	G	G	R	G	G	G	G	G	G	G	G
S1D_3086581	G/T	1D	3086581	+	G	G	G	G	G	G	G	G	G	G	G	G	G	G	G	G	G	G	G	K	G	G	G	G	G	G	G	G	G	G	G	G	G	G	G	G	K	G	G	G	G	G	G	G	G
S1D_3086608	G/A	1D	3086608	+	G	G	G	G	G	G	G	G	G	G	G	G	G	G	G	G	G	G	G	R	G	G	G	G	G	G	G	G	G	G	G	G	G	G	G	G	R	G	G	G	G	G	G	G	G
S1D_3086613	C/T	1D	3086613	+	Y	C	Y	C	Y	C	C	C	C	C	C	C	C	C	C	T	C	C	C	C	C	C	C	C	C	C	C	C	C	C	Y	C	Y	Y	C	C	Y	C	C	C	C	C	Y	C	C
S1D_3086615	C/T	1D	3086615	+	C	C	C	C	C	C	C	C	C	C	C	C	C	C	C	C	C	C	C	Y	C	C	C	C	C	C	C	C	C	C	C	C	C	C	C	C	Y	C	C	C	C	C	C	C	C
S1D_3331627	C/A	1D	3331627	+	C	C	M	C	C	C	C	C	C	C	C	C	C	C	C	C	M	C	C	C	C	C	C	C	M	C	M	C	C	C	C	A	A	C	C	C	C	C	M	C	M	C	C	C	M
S1D_3331645	C/T	1D	3331645	+	C	C	Y	C	C	C	C	C	C	C	C	C	C	C	C	C	Y	C	C	C	C	C	C	C	Y	C	Y	C	C	C	C	T	T	C	C	C	C	C	Y	C	Y	C	C	C	Y
S1D_3331661	A/C	1D	3331661	+	A	A	M	A	A	A	A	A	A	A	A	A	A	A	A	A	M	A	A	A	A	A	A	A	M	A	M	A	A	A	A	C	C	A	A	A	A	A	M	A	M	A	A	A	M
S1D_3495980	G/A	1D	3495980	+	G	G	G	G	R	R	G	G	G	G	G	G	G	G	R	G	G	G	G	G	G	G	R	R	G	G	G	G	G	G	G	G	G	G	G	G	G	G	G	G	G	G	G	G	G
S1D_3495983	A/C	1D	3495983	+	M	A	A	A	A	A	A	A	A	A	A	M	A	A	A	A	A	A	A	A	A	A	A	A	A	A	A	M	A	A	M	A	A	A	A	A	A	A	M	M	A	A	C	M	A
S1D_3495991	G/T	1D	3495991	+	G	G	T	K	G	G	G	G	G	G	G	G	G	G	G	G	G	G	G	G	G	G	G	G	K	G	G	G	K	G	G	G	G	G	G	G	G	G	G	G	G	G	G	G	G
S1D_3496005	A/G	1D	3496005	+	A	A	A	A	R	A	A	A	A	G	A	A	A	A	R	A	A	A	R	A	A	A	A	A	A	A	A	A	A	A	R	R	A	A	A	R	A	R	A	R	A	A	A	A	A
S1D_3496008	A/G	1D	3496008	+	A	A	A	R	A	R	A	A	G	A	A	A	A	A	A	A	A	G	A	A	A	A	A	A	R	A	R	A	R	A	A	A	A	R	A	A	R	A	A	A	A	A	A	A	A
S1D_3496027	C/G	1D	3496027	+	S	C	C	C	C	C	C	C	C	C	C	S	C	C	C	C	C	C	C	C	C	C	C	C	C	C	C	S	C	C	S	C	C	C	C	C	C	C	S	S	C	C	G	S	C
S1D_4002146	T/C	1D	4002146	+	C	T	T	C	C	T	T	T	T	T	T	T	T	T	T	T	Y	T	T	T	T	T	T	T	T	T	T	T	T	C	T	T	C	C	C	T	T	C	T	C	Y	C	T	C	T
S1D_4002172	A/T	1D	4002172	+	A	A	A	A	A	A	A	A	A	A	A	A	T	A	A	A	A	T	A	A	A	A	A	A	A	A	T	A	A	A	T	T	A	A	A	T	A	A	T	A	A	A	T	A	A
S1D_4011654	T/C	1D	4011654	+	T	T	T	T	T	T	T	T	T	T	T	T	C	T	T	T	T	C	T	T	T	T	T	T	T	T	C	T	T	T	C	C	T	T	T	C	T	T	C	T	T	T	C	T	T
S1D_4039293	A/G	1D	4039293	+	A	A	A	A	A	A	A	A	A	A	A	A	G	A	A	A	A	G	A	A	A	A	A	A	A	A	G	A	A	A	G	G	A	A	A	G	A	A	G	A	A	A	G	A	A
S1D_4039294	G/T	1D	4039294	+	G	G	G	G	G	G	G	G	G	G	G	G	T	G	G	G	G	T	G	G	G	G	G	G	G	G	T	G	G	G	T	T	G	G	G	T	G	G	T	G	G	G	T	G	G
S1D_4039296	G/T	1D	4039296	+	G	G	G	G	G	G	G	G	G	G	G	G	T	G	G	G	G	T	G	G	G	G	G	G	G	G	T	G	G	G	T	T	G	G	G	T	G	G	T	G	G	G	T	G	G
S1D_4039297	G/A	1D	4039297	+	G	G	G	G	G	G	G	G	G	G	G	G	A	G	G	G	G	A	G	G	G	G	G	G	G	G	A	G	G	G	A	A	G	G	G	A	G	G	A	G	G	G	A	G	G
S1D_4104485	G/A	1D	4104485	+	R	G	G	R	G	G	G	G	R	G	G	G	G	G	G	G	R	G	G	R	G	G	R	G	R	G	G	G	G	G	G	G	R	G	G	G	R	G	G	G	R	G	G	R	G
S1D_4104486	C/A	1D	4104486	+	M	C	C	M	C	C	C	C	M	C	C	C	C	C	C	C	M	C	C	M	C	C	M	C	M	C	C	C	C	C	C	C	M	C	C	C	M	C	C	C	M	C	C	M	C
S1D_4104489	T/A	1D	4104489	+	W	T	T	W	T	T	T	T	W	T	T	T	T	T	T	T	W	T	T	W	T	T	W	T	W	T	T	T	T	T	T	T	W	T	T	T	W	T	T	T	W	T	T	W	T
S1D_4104500	C/G	1D	4104500	+	C	C	C	S	C	C	S	C	C	C	C	C	C	C	C	C	C	C	C	C	S	C	C	C	C	C	C	C	C	C	C	C	C	C	C	C	C	S	C	S	C	C	C	C	C
S1D_4113915	G/A	1D	4113915	+	A	G	G	R	A	G	A	G	G	G	G	G	A	G	A	A	R	A	A	G	G	A	G	R	G	R	G	G	G	A	R	R	A	R	A	A	G	A	G	A	G	A	G	A	G
S1D_4140111	C/T	1D	4140111	+	C	C	C	Y	Y	C	C	C	C	C	C	C	C	C	T	Y	C	Y	Y	C	C	Y	C	C	C	Y	Y	C	C	C	C	C	C	C	Y	Y	C	T	C	C	C	Y	C	C	C
S1D_4140140	C/T	1D	4140140	+	C	C	C	Y	Y	C	C	C	C	C	C	C	C	C	T	Y	C	Y	Y	C	C	Y	C	C	C	Y	Y	C	C	C	C	C	C	C	Y	Y	C	T	C	C	C	Y	C	C	C
S1D_4276098	C/G	1D	4276098	+	C	C	C	C	C	C	G	C	C	C	C	C	C	C	C	C	C	C	G	G	C	C	C	S	C	C	G	C	C	C	C	G	C	C	C	G	G	C	G	C	C	C	C	C	C
S1D_4342135	A/C	1D	4342135	+	A	A	A	A	A	A	A	A	A	A	A	C	A	A	A	A	A	A	A	A	A	A	C	A	A	A	A	A	A	A	A	A	A	A	A	A	A	A	A	A	A	A	A	A	A
S1D_4342161	A/C	1D	4342161	+	C	A	A	A	A	A	A	A	A	A	A	C	A	A	A	A	C	A	A	C	A	A	C	A	A	A	A	A	A	C	A	C	A	A	A	A	C	A	A	C	A	C	A	C	A
S1D_4585829	C/T	1D	4585829	+	C	C	C	C	C	Y	C	C	C	C	Y	C	C	C	C	C	Y	C	C	C	Y	C	Y	Y	C	C	Y	C	Y	C	C	C	C	Y	C	C	C	C	C	C	C	C	C	Y	C
S1D_4585837	G/A	1D	4585837	+	G	G	G	G	G	G	G	G	G	G	G	G	G	G	G	G	G	G	G	R	G	G	R	G	G	G	G	G	G	R	G	G	G	G	G	G	G	G	G	G	G	G	G	R	R
S1D_4585845	C/T	1D	4585845	+	C	C	C	C	C	Y	C	C	C	C	Y	C	C	C	C	C	Y	C	C	C	Y	C	Y	Y	C	C	Y	C	Y	C	C	C	C	Y	C	C	C	C	C	C	C	C	C	C	C
S1D_4585859	G/A	1D	4585859	+	G	G	G	G	G	G	G	G	G	G	G	G	G	G	R	G	G	G	G	G	G	G	G	G	G	G	R	G	R	G	G	G	G	G	R	G	G	G	R	G	G	G	R	G	G
S1D_4777393	C/T	1D	4777393	+	C	C	C	C	C	C	C	C	C	C	C	T	C	C	C	C	C	C	C	C	C	C	T	C	C	C	C	C	C	C	C	C	C	C	C	C	C	C	C	C	C	C	C	C	C
S1D_4777859	G/A	1D	4777859	+	G	G	G	G	G	G	G	G	G	G	G	G	A	G	G	G	G	G	G	G	G	G	G	G	G	G	A	G	G	G	G	G	G	G	G	A	G	G	A	G	G	G	G	G	G
S1D_4803572	C/G	1D	4803572	+	C	C	C	C	C	C	C	C	G	C	C	C	G	C	C	C	C	C	C	C	G	C	C	C	C	C	G	C	C	C	C	C	C	C	C	G	C	C	G	C	C	C	S	C	C
S1D_4803617	G/A	1D	4803617	+	A	A	A	G	G	G	G	A	G	R	A	G	G	A	G	G	A	G	G	A	G	G	G	G	A	G	G	A	A	A	G	G	G	G	G	G	A	G	G	A	G	A	G	A	A
S1D_4808734	C/T	1D	4808734	+	C	C	C	C	C	T	C	C	C	C	C	T	C	C	C	C	C	C	C	C	C	C	T	C	C	C	C	C	C	C	C	C	C	C	C	C	C	C	C	C	C	C	C	C	C
S1D_4898292	C/T	1D	4898292	+	C	C	Y	C	C	C	Y	Y	Y	C	C	C	Y	C	C	C	C	C	C	C	C	C	Y	C	C	Y	C	Y	Y	C	C	C	C	C	C	C	C	C	C	C	C	C	C	C	C
S1D_5152552	C/T	1D	5152552	+	C	C	C	C	C	C	C	C	C	C	Y	C	C	C	C	C	C	C	Y	C	C	C	Y	C	Y	C	Y	C	C	Y	C	C	C	C	C	C	C	C	C	C	C	Y	Y	C	C
S1D_5152564	G/A	1D	5152564	+	G	G	G	G	G	G	G	G	G	G	R	G	G	G	G	G	G	G	R	G	G	G	R	G	R	G	R	G	G	R	G	G	G	G	G	G	G	G	G	G	G	R	R	G	G
S1D_5152576	A/C	1D	5152576	+	A	A	A	A	A	A	A	A	A	A	M	A	A	A	A	A	A	A	M	A	A	A	M	A	M	A	M	A	A	M	A	A	A	A	A	A	A	A	A	A	A	M	M	A	A
S1D_5152579	G/A	1D	5152579	+	G	G	G	G	G	G	G	G	G	G	R	G	G	G	G	G	G	G	R	G	G	G	R	G	R	G	R	G	G	R	G	G	G	G	G	G	G	G	G	G	G	R	R	G	G
S1D_5956020	G/C	1D	5956020	+	G	G	G	G	G	G	G	G	G	G	G	G	C	G	G	G	G	G	G	G	G	G	G	G	G	G	C	G	G	G	C	C	G	G	G	G	G	G	G	G	G	G	G	G	G
S1D_5960697	C/T	1D	5960697	+	Y	C	C	C	C	C	C	C	C	C	C	C	C	C	C	C	T	T	C	C	C	C	C	C	C	C	C	C	C	T	C	C	C	C	C	C	C	C	C	Y	C	C	C	Y	C
S1D_5960722	G/A	1D	5960722	+	G	G	G	R	R	G	R	G	A	A	G	G	G	G	R	R	G	G	A	A	A	A	G	R	G	R	G	G	G	G	G	G	G	R	G	G	A	G	G	G	R	G	G	G	G
S1D_5995272	A/C	1D	5995272	+	C	A	A	A	A	C	A	A	A	A	A	A	A	A	A	A	C	C	A	A	A	A	A	A	A	A	A	A	A	C	A	A	A	A	A	C	A	A	C	C	A	C	A	C	A
S1D_5995287	G/A	1D	5995287	+	G	G	G	G	G	G	G	G	G	G	G	A	G	G	G	G	G	G	G	A	A	G	A	G	G	G	G	G	G	G	G	G	G	G	G	G	A	G	G	G	G	G	G	G	G
S1D_6017359	C/T	1D	6017359	+	C	C	C	C	C	Y	C	C	C	C	C	C	C	C	C	C	C	C	C	C	C	C	C	C	C	C	C	C	Y	C	C	C	C	C	C	C	C	C	C	C	C	Y	C	C	C
S1D_6017375	G/A	1D	6017375	+	G	G	G	R	G	G	R	G	G	G	G	G	G	G	G	G	G	G	G	G	G	G	R	R	R	A	G	G	G	G	G	G	G	R	G	G	G	G	G	G	G	G	G	R	G
S1D_6017381	C/T	1D	6017381	+	C	C	C	C	C	Y	C	C	C	C	C	C	C	C	C	C	C	C	C	C	C	C	C	C	C	C	C	C	Y	C	C	C	C	C	C	C	C	C	C	C	C	Y	C	C	C
S1D_6017385	A/G	1D	6017385	+	A	A	A	A	A	R	A	A	A	A	A	A	A	A	A	A	A	A	A	A	A	A	A	A	A	A	A	A	R	A	A	A	A	A	A	A	A	A	A	A	A	R	A	A	A
S1D_6100976	A/G	1D	6100976	+	A	A	A	A	A	A	A	A	A	A	A	A	G	A	A	A	A	A	A	A	G	A	A	A	A	A	G	A	A	A	G	G	G	A	G	G	A	G	G	A	A	A	A	A	A
S1D_6101019	T/C	1D	6101019	+	T	C	C	C	C	T	C	C	T	T	C	T	T	C	C	C	T	T	C	T	T	C	T	C	C	C	T	C	C	T	T	T	T	C	T	T	T	T	T	T	C	T	T	T	C
S1D_6122787	C/G	1D	6122787	+	C	C	C	C	C	C	C	C	S	C	C	C	C	C	C	C	C	C	C	S	S	C	C	C	C	C	C	C	C	C	C	C	C	C	C	C	S	C	C	C	C	C	C	C	C
S1D_6438070	C/G	1D	6438070	+	C	C	C	C	C	S	S	C	G	C	C	C	C	G	C	C	C	C	G	S	S	C	C	S	C	C	C	C	C	C	C	C	C	C	C	C	S	C	C	C	C	C	C	C	C
S1D_6439502	G/C	1D	6439502	+	G	G	G	G	G	G	G	G	G	G	G	G	S	G	G	G	G	G	G	G	G	G	G	G	G	G	G	S	G	G	G	G	G	G	G	G	G	G	G	G	S	G	G	G	G
S1D_6439503	C/T	1D	6439503	+	C	C	C	C	C	C	C	C	C	C	C	C	Y	C	C	C	C	C	C	C	C	C	C	C	C	C	C	Y	C	C	C	C	C	C	C	C	C	C	C	C	Y	C	C	C	C
S1D_6439543	A/T	1D	6439543	+	A	T	A	T	T	T	A	A	A	A	A	A	W	A	A	A	A	A	A	A	A	A	A	A	A	A	A	W	A	A	A	A	W	A	A	A	A	A	A	A	W	A	A	A	A
S1D_6468584	G/T	1D	6468584	+	T	G	G	G	G	G	G	G	G	K	G	G	G	G	T	T	G	G	G	G	G	T	G	G	G	T	G	G	G	T	T	G	G	G	G	T	G	G	T	T	G	T	T	T	G
S1D_6541242	A/G	1D	6541242	+	G	A	A	A	A	A	A	A	A	R	A	A	G	A	G	G	A	G	A	A	G	G	A	A	A	G	G	A	A	G	G	G	A	A	A	G	A	A	G	G	A	G	G	G	A
S1D_6546911	A/G	1D	6546911	+	A	A	A	A	R	A	A	A	R	A	A	A	A	A	R	A	A	A	A	A	A	G	A	R	R	A	A	R	R	A	A	A	A	A	A	A	A	A	A	A	A	A	A	A	A
S1D_6546924	G/A	1D	6546924	+	G	G	G	R	R	G	R	G	G	G	G	R	G	G	G	G	G	G	R	A	G	G	R	R	G	G	G	G	G	G	G	G	G	R	G	G	R	G	G	G	R	G	G	R	G
S1D_6647968	A/G	1D	6647968	+	A	A	A	A	A	A	A	A	A	A	A	A	G	A	A	A	A	G	A	A	G	A	A	A	A	A	G	A	A	A	A	G	A	A	A	A	A	A	A	A	A	A	A	A	A
S1D_6785365	C/G	1D	6785365	+	C	G	G	C	C	C	C	G	C	G	G	C	G	C	C	C	C	G	C	G	C	C	C	C	G	C	G	G	G	C	G	G	G	C	G	C	G	G	C	C	C	C	C	C	G
S1D_6793516	C/T	1D	6793516	+	C	C	C	C	C	T	C	C	T	C	C	T	C	T	C	C	C	C	C	C	C	C	T	C	C	C	C	C	C	C	C	C	C	C	C	C	C	C	C	C	C	C	T	C	C
S1D_6817392	G/T	1D	6817392	+	G	G	G	G	G	T	T	G	T	T	G	T	T	G	G	G	G	T	T	G	T	G	T	T	G	G	T	G	G	G	T	T	G	G	G	T	G	G	T	G	G	G	T	G	G
S1D_6817402	T/G	1D	6817402	+	T	T	T	T	T	G	G	T	G	G	T	G	G	T	T	T	T	G	G	T	G	T	G	G	T	T	G	T	T	T	G	G	T	T	T	G	T	T	G	T	T	T	G	T	T
S1D_6880655	C/T	1D	6880655	+	T	C	C	C	C	C	C	C	C	T	C	C	C	C	Y	Y	C	C	C	C	C	Y	C	C	C	T	C	C	C	C	C	C	C	C	C	C	C	C	C	Y	C	Y	T	Y	C
S1D_6945817	C/T	1D	6945817	+	Y	Y	C	C	C	C	C	C	C	Y	C	C	C	C	C	C	C	T	C	C	C	Y	C	C	C	C	C	C	C	C	C	C	Y	C	C	Y	C	C	C	C	C	C	C	C	C
S1D_7168311	C/A	1D	7168311	+	C	C	C	C	C	C	C	M	C	C	M	M	C	C	C	C	C	C	C	C	C	C	C	C	C	C	C	C	C	C	C	C	C	C	C	C	C	C	C	C	C	C	C	A	C
S1D_7178945	T/G	1D	7178945	+	T	T	T	K	T	T	K	K	T	T	T	K	T	T	T	T	T	T	G	T	T	T	T	T	T	T	T	K	K	T	K	T	K	T	K	K	T	T	G	K	T	T	T	T	T
S1D_7178947	C/A	1D	7178947	+	C	C	C	M	C	C	M	M	C	C	C	M	C	C	C	C	C	C	A	C	C	C	C	C	C	C	C	M	M	C	M	C	M	C	M	M	C	C	A	M	C	C	C	C	C
S1D_7178949	T/A	1D	7178949	+	T	T	T	W	T	T	W	W	T	T	T	W	T	T	T	T	T	T	A	T	T	T	T	T	T	T	T	W	W	T	W	T	W	T	W	W	T	T	A	W	T	T	T	T	T
S1D_7178950	T/C	1D	7178950	+	T	T	T	T	T	T	T	T	T	T	T	T	T	T	T	T	T	T	T	T	T	T	T	T	T	T	T	T	T	T	Y	T	Y	T	T	Y	T	T	T	T	T	T	T	T	T
S1D_7255252	G/A	1D	7255252	+	G	R	R	A	R	A	A	R	R	G	R	G	G	G	G	G	G	G	G	G	G	G	G	G	G	G	G	G	A	R	G	G	G	G	G	G	G	R	G	G	G	G	G	G	G
S1D_7255258	A/G	1D	7255258	+	A	R	R	G	R	G	G	R	R	A	R	A	A	A	A	A	A	A	A	A	A	A	A	A	A	A	A	A	G	R	A	A	A	A	A	A	A	R	A	A	A	A	A	A	A
S1D_7300011	G/C	1D	7300011	+	G	G	G	G	G	C	G	G	G	G	G	G	G	G	G	G	G	G	G	G	G	G	G	G	G	G	G	G	G	G	G	G	G	G	G	G	G	G	G	G	G	G	G	G	G
S1D_7300555	C/G	1D	7300555	+	C	C	C	C	C	C	C	C	C	S	C	C	C	C	C	C	C	C	C	C	C	C	C	C	C	C	C	C	C	C	C	C	C	C	C	C	C	C	C	C	C	C	G	C	C
S1D_7573390	G/A	1D	7573390	+	G	G	G	G	G	G	G	G	G	G	G	G	A	A	G	G	G	G	G	G	R	G	G	G	G	G	R	G	G	G	G	G	G	G	G	R	G	G	R	G	G	G	G	G	G
S1D_7573411	G/A	1D	7573411	+	A	G	G	G	G	G	G	G	G	R	G	G	G	G	G	G	G	G	A	G	G	G	G	G	G	G	G	G	G	G	G	G	R	G	G	R	G	G	G	A	G	A	R	A	G
S1D_7573413	A/G	1D	7573413	+	A	A	A	A	A	A	A	A	R	A	A	A	A	A	R	R	A	A	A	R	A	R	A	A	A	G	A	A	A	A	A	A	R	A	G	A	R	R	A	A	A	A	R	A	A
S1D_7588240	G/A	1D	7588240	+	G	G	G	G	G	G	G	G	G	G	G	G	A	G	G	G	G	G	G	G	G	G	G	G	G	G	A	G	G	G	A	A	G	G	G	A	G	G	A	G	G	G	G	G	G
S1D_7640276	T/C	1D	7640276	+	T	T	T	T	T	T	T	Y	T	T	T	T	Y	T	Y	T	Y	T	T	T	T	T	T	Y	T	T	T	T	T	T	T	T	T	T	Y	T	T	T	T	T	T	Y	T	T	Y
S1D_7800465	T/C	1D	7800465	+	C	T	T	T	T	T	T	T	T	C	T	T	T	C	T	T	T	T	T	C	T	T	T	T	T	T	T	T	T	C	T	T	T	T	T	T	C	T	T	C	T	C	C	C	T
S1D_7800490	C/A	1D	7800490	+	C	C	C	A	A	A	C	C	C	C	C	C	C	C	C	C	A	C	C	C	C	C	C	C	C	C	C	C	C	C	C	C	C	A	C	C	C	C	C	C	A	C	C	C	C
S1D_7800505	C/G	1D	7800505	+	C	C	C	G	G	G	C	C	C	C	C	C	C	C	C	C	G	C	C	C	C	C	C	C	C	C	C	C	C	C	C	C	C	G	C	C	C	C	C	C	G	C	C	C	C
S1D_8127120	G/T	1D	8127120	+	G	G	G	G	G	T	G	G	G	T	G	G	G	G	G	G	G	G	G	T	T	G	G	G	G	G	G	G	G	G	G	G	T	G	T	G	T	T	G	G	G	G	T	K	G
S1D_8127138	T/G	1D	8127138	+	T	T	T	T	T	T	T	T	T	T	T	G	T	T	T	T	T	T	T	T	T	T	G	T	T	T	T	T	T	T	T	T	T	T	T	T	T	T	T	T	T	T	T	T	T
S1D_8515507	C/T	1D	8515507	+	C	C	C	C	C	C	C	C	C	Y	C	C	C	C	C	C	C	C	C	C	C	C	C	C	C	C	C	C	C	C	C	C	Y	C	Y	C	C	Y	C	C	C	C	C	C	C
S1D_8516797	G/T	1D	8516797	+	G	G	G	K	K	G	G	G	G	G	G	G	G	G	K	K	G	G	G	G	G	K	G	G	G	K	G	G	G	G	G	G	G	K	G	G	G	G	G	G	K	G	G	G	G
S1D_8516817	A/C	1D	8516817	+	A	A	A	M	M	A	A	A	A	A	A	A	A	A	M	M	A	A	A	A	A	M	A	A	A	M	A	A	A	A	A	A	A	M	A	A	A	A	A	A	M	A	A	A	A
S1D_8590917	C/A	1D	8590917	+	A	C	C	C	C	C	C	C	C	C	C	C	C	C	C	C	C	C	C	C	C	C	C	C	C	C	C	C	C	C	C	C	A	C	C	A	C	C	C	A	C	A	C	C	C
S1D_8590920	A/G	1D	8590920	+	G	A	A	A	A	A	A	A	A	A	A	A	A	A	A	A	A	A	A	A	A	A	A	A	A	A	A	A	A	A	A	A	G	A	A	G	A	A	A	G	A	G	A	A	A
S1D_8590928	C/G	1D	8590928	+	G	C	C	C	C	C	C	C	C	C	C	C	C	C	C	C	C	C	C	C	C	C	C	C	C	C	C	C	C	C	C	C	G	C	C	G	C	C	C	G	C	G	C	C	C
S1D_8590954	G/A	1D	8590954	+	A	G	G	G	G	G	G	G	G	G	G	G	G	G	G	G	G	G	G	G	G	G	G	G	G	G	G	G	G	G	G	G	A	G	G	A	G	G	G	A	G	A	G	G	G
S1D_8660765	C/T	1D	8660765	+	C	C	C	C	C	C	C	C	Y	C	C	C	C	C	C	C	C	C	C	C	C	C	C	C	C	C	C	C	C	C	C	C	C	C	Y	C	C	Y	C	C	C	C	C	C	C
S1D_8660783	C/T	1D	8660783	+	C	Y	C	C	C	C	C	C	C	C	Y	C	C	Y	C	C	C	C	C	C	C	C	C	C	Y	C	C	Y	C	Y	C	C	C	C	C	C	C	C	C	Y	C	C	C	Y	Y
S1D_8664224	T/C	1D	8664224	+	T	T	T	T	T	T	T	T	T	Y	T	T	T	T	T	T	T	T	T	T	T	T	C	C	C	T	C	Y	C	T	C	C	Y	C	T	T	C	T	C	T	C	T	T	T	C
S1D_8836240	T/A	1D	8836240	+	T	T	T	T	W	T	T	T	T	T	T	T	T	T	T	T	T	T	W	T	T	T	T	W	T	T	T	T	T	W	T	T	T	T	T	W	T	T	T	W	T	T	W	T	T
S1D_9415739	C/T	1D	9415739	+	C	C	C	Y	C	C	C	C	C	T	T	C	C	C	Y	T	C	C	T	C	C	C	C	C	C	Y	Y	C	Y	T	C	C	C	C	Y	C	C	Y	C	C	C	C	C	Y	C
S1D_9415773	G/A	1D	9415773	+	A	G	G	G	G	R	G	G	G	G	G	G	G	G	G	G	G	G	G	G	G	G	G	G	G	G	G	A	G	G	G	G	G	G	R	R	G	G	G	R	G	G	G	G	G
S1D_9415783	A/G	1D	9415783	+	A	A	A	A	A	A	A	A	A	A	A	A	R	A	A	A	A	A	A	A	A	A	A	A	A	A	R	A	A	A	R	R	A	A	A	R	A	A	R	A	A	A	A	A	A
S1D_9415790	A/G	1D	9415790	+	A	A	A	R	A	A	A	A	A	G	G	A	A	A	R	G	A	A	G	A	A	A	A	A	A	R	R	A	R	G	A	A	A	A	R	A	A	R	A	A	A	A	A	R	A
S1D_9415793	G/A	1D	9415793	+	A	G	G	G	G	R	G	G	G	G	G	G	G	G	G	G	G	G	G	G	G	G	G	G	G	G	G	A	G	G	G	G	G	G	R	R	G	G	G	R	G	G	G	G	G
S1D_9602845	G/A	1D	9602845	+	G	G	G	G	G	G	G	G	G	G	G	G	R	G	G	R	G	R	G	G	G	R	G	G	G	R	R	G	G	G	R	R	G	G	G	G	G	R	R	G	G	G	G	G	G
S1D_9730872	C/T	1D	9730872	+	C	C	C	C	C	C	C	C	C	C	C	C	T	C	C	C	C	T	C	C	C	C	C	C	C	C	T	C	C	C	T	T	C	C	C	T	C	C	T	C	C	C	T	C	C
S1D_9730888	C/G	1D	9730888	+	C	G	G	C	C	C	C	G	C	C	G	G	G	C	C	C	C	G	C	G	C	C	G	C	G	C	G	G	G	C	G	G	C	C	C	G	G	C	G	C	C	C	G	C	G
S1D_9730889	T/A	1D	9730889	+	T	T	T	T	T	T	T	T	T	T	T	T	A	T	T	T	T	A	T	T	T	T	T	T	T	T	A	T	T	T	A	A	T	T	T	A	T	T	A	T	T	T	A	T	T
S1D_9758736	G/A	1D	9758736	+	G	R	G	G	G	G	G	G	G	G	G	A	G	R	G	R	G	R	G	R	G	G	A	G	G	G	G	G	G	G	G	G	G	G	G	G	G	G	G	G	G	G	G	G	G
S1D_9901169	A/G	1D	9901169	+	A	A	A	A	A	R	R	A	A	R	A	A	A	A	A	R	A	A	R	R	A	A	A	A	A	A	A	A	A	A	A	A	A	A	A	A	A	R	R	A	R	A	A	R	A
S1D_9991338	A/T	1D	9991338	+	A	T	T	A	A	A	A	T	T	A	T	A	A	A	T	T	A	A	A	T	T	T	A	A	T	T	A	T	W	A	A	A	T	A	T	A	T	T	A	A	A	A	A	A	T
S1D_9995588	A/G	1D	9995588	+	A	A	A	A	A	A	A	A	A	A	A	A	A	A	A	A	A	A	A	A	A	A	A	A	A	A	A	A	A	A	A	A	G	A	G	A	A	R	A	A	A	A	A	A	A
S1D_10006006	G/T	1D	10006006	+	G	G	G	G	G	G	G	G	G	G	G	G	T	G	G	G	G	G	G	G	G	G	G	G	G	G	T	G	G	G	K	K	G	G	G	T	G	G	K	G	G	G	G	G	G
S1D_10006022	T/A	1D	10006022	+	T	W	W	T	T	T	T	A	T	T	W	T	T	T	T	T	T	T	T	T	T	T	T	T	W	T	T	W	T	T	T	T	T	T	T	T	T	T	T	T	T	T	T	T	W
S1D_10171486	C/T	1D	10171486	+	C	C	C	C	C	C	C	C	Y	Y	C	C	C	C	Y	Y	C	C	C	C	C	Y	C	C	C	Y	C	C	C	C	C	C	C	C	C	C	C	C	C	C	C	C	C	C	C
S1D_10171492	C/T	1D	10171492	+	C	C	C	C	C	C	C	C	Y	Y	C	C	C	C	Y	Y	C	C	C	C	C	Y	C	C	C	Y	C	C	C	C	C	C	C	C	C	C	C	C	C	C	C	C	C	C	C
S1D_10188079	A/C	1D	10188079	+	C	A	A	A	C	C	C	C	C	C	A	A	C	A	C	C	A	A	C	A	A	A	A	A	A	A	C	A	A	A	A	A	C	A	A	C	A	A	A	C	A	C	C	C	A
S1D_10188089	G/A	1D	10188089	+	A	G	G	G	A	A	A	A	A	A	G	G	A	G	A	A	G	G	A	G	G	G	G	G	G	G	A	G	G	G	G	G	A	G	G	A	G	G	G	A	G	A	A	A	G
S1D_10188091	T/C	1D	10188091	+	C	T	T	T	C	C	C	C	C	C	T	T	C	T	C	C	T	T	C	T	T	T	T	T	T	T	C	T	T	T	T	T	C	T	T	C	T	T	T	C	T	C	C	C	T
S1D_10188097	C/G	1D	10188097	+	G	C	C	C	G	G	G	G	G	G	C	C	G	C	G	G	C	C	G	C	C	C	C	C	C	C	G	C	C	C	C	C	G	C	C	G	C	C	C	G	C	G	G	G	C
S1D_10188101	C/A	1D	10188101	+	A	C	C	C	A	A	A	A	A	A	C	C	A	C	A	A	C	C	A	C	C	C	C	C	C	C	A	C	C	C	C	C	A	C	C	A	C	C	C	A	C	A	A	A	C
S1D_10366887	C/A	1D	10366887	+	C	C	C	C	M	C	M	C	C	C	C	C	C	M	C	C	C	C	M	C	C	C	C	C	C	C	C	C	C	C	C	C	C	M	C	C	C	C	C	C	M	C	C	C	C
S1D_10368398	C/T	1D	10368398	+	C	C	C	T	T	T	T	C	T	C	C	T	C	T	C	C	T	C	T	T	T	C	T	T	Y	C	C	C	C	C	C	C	C	T	C	C	T	C	C	C	T	C	C	C	C
S1D_10368402	G/T	1D	10368402	+	G	G	G	T	T	T	T	G	G	G	G	G	G	G	G	G	T	G	T	T	G	G	G	T	K	G	G	G	G	G	G	G	G	T	G	G	T	G	G	G	T	G	G	G	G
S1D_10519759	G/T	1D	10519759	+	T	G	G	G	G	G	G	G	G	G	G	G	G	G	T	T	G	G	G	G	G	T	G	G	G	T	G	G	G	T	G	G	G	G	G	G	G	G	G	T	G	T	G	T	G
S1D_10519773	T/C	1D	10519773	+	T	T	T	C	C	C	C	T	C	C	T	C	T	C	T	T	C	T	C	T	C	T	C	C	T	T	T	T	Y	T	T	T	T	C	T	T	T	T	T	T	C	T	C	T	T
S1D_10578099	A/C	1D	10578099	+	A	A	A	A	A	A	A	A	A	A	A	A	A	A	A	A	A	A	A	A	A	A	A	A	A	A	A	A	A	A	C	C	A	A	A	C	A	A	C	A	A	A	A	A	A
S1D_10672575	G/C	1D	10672575	+	G	G	G	G	G	G	G	G	G	G	G	G	C	G	G	G	G	C	G	G	G	G	G	G	G	G	C	G	G	G	G	G	G	G	G	G	G	G	G	G	G	G	G	G	G
S1D_10672609	G/A	1D	10672609	+	G	G	G	G	G	G	G	G	G	G	G	G	A	G	G	G	G	A	G	G	G	G	G	G	G	G	A	G	G	G	G	G	G	G	G	G	G	G	G	G	G	G	G	G	G
S1D_10672626	G/A	1D	10672626	+	G	G	G	G	G	G	G	G	G	G	G	G	A	G	G	G	G	A	G	G	G	G	G	G	G	G	A	G	G	G	G	G	G	G	G	G	G	G	G	G	G	G	G	G	G
S1D_10674919	C/G	1D	10674919	+	C	C	C	C	C	C	C	C	C	C	C	C	C	C	C	C	C	C	C	C	C	C	C	C	C	C	C	C	C	C	C	C	C	C	C	C	C	C	C	C	C	C	G	C	C
S1D_10674928	T/C	1D	10674928	+	T	C	C	T	T	T	T	C	T	C	C	T	T	T	C	C	T	T	T	T	T	C	T	T	C	C	T	C	C	T	T	T	T	T	T	T	T	T	T	T	T	T	T	T	C
S1D_10676974	G/A	1D	10676974	+	G	G	G	G	G	G	G	G	G	G	G	G	A	G	G	G	G	A	G	G	G	G	G	G	G	G	A	G	G	G	G	G	G	G	G	G	G	G	G	G	G	G	G	G	G
S1D_10677003	G/A	1D	10677003	+	G	G	G	G	G	G	G	G	G	G	G	G	A	G	G	G	G	A	G	G	G	G	G	G	G	G	A	G	G	G	A	A	G	G	G	A	G	G	A	G	G	G	A	G	G
S1D_10677043	T/C	1D	10677043	+	T	T	T	T	T	T	T	T	T	T	T	T	C	T	T	T	T	C	T	T	T	T	T	T	T	T	C	T	T	T	C	C	T	T	T	C	T	T	C	T	T	T	C	T	T
S1D_10755493	T/C	1D	10755493	+	T	C	C	T	T	T	T	C	T	C	C	T	T	T	T	T	T	T	T	T	T	T	T	T	C	T	T	Y	C	T	Y	T	T	T	T	T	T	T	T	T	T	T	T	T	C
S1D_10888331	C/G	1D	10888331	+	C	C	C	C	C	C	C	C	C	C	C	C	S	S	S	G	S	S	S	S	S	S	C	C	C	C	S	C	C	C	C	C	C	C	C	C	C	C	C	C	C	C	C	S	C
S1D_10888341	T/C	1D	10888341	+	T	T	T	T	T	T	T	T	T	T	T	T	Y	Y	Y	C	Y	Y	Y	Y	Y	Y	T	T	T	T	Y	T	T	T	T	T	T	T	T	T	T	T	T	T	T	T	T	Y	T
S1D_10888369	A/G	1D	10888369	+	A	A	A	A	A	A	A	A	A	A	A	A	R	R	R	G	R	R	R	R	R	R	A	A	A	A	R	A	A	A	A	A	A	A	A	A	A	A	A	A	A	A	A	R	A
S1D_10891088	T/A	1D	10891088	+	T	T	W	W	W	W	W	T	T	T	T	T	T	T	T	T	T	T	T	T	T	T	T	W	T	T	T	T	T	T	T	T	T	W	T	T	T	T	T	T	W	T	T	T	T
S1D_10891118	C/T	1D	10891118	+	C	C	Y	Y	Y	Y	Y	C	C	C	C	C	C	C	C	C	C	C	C	C	C	C	C	Y	C	C	C	C	C	C	C	C	C	Y	C	C	C	C	C	C	Y	C	C	C	C
S1D_10891155	A/T	1D	10891155	+	A	W	W	A	A	A	A	A	A	A	W	A	A	A	A	A	A	A	A	A	A	A	A	A	W	A	A	W	W	A	A	A	A	A	A	A	A	A	A	A	A	A	A	A	W
S1D_10955035	T/C	1D	10955035	+	T	C	C	T	T	T	C	C	T	T	C	T	T	T	C	C	T	T	C	T	T	C	T	C	C	C	T	C	C	T	T	T	T	T	T	T	T	T	T	T	T	T	T	T	C
S1D_10955092	G/T	1D	10955092	+	G	G	G	T	G	G	G	G	G	G	G	G	G	G	G	G	T	T	G	G	G	G	G	G	G	G	G	G	G	G	G	G	G	T	G	G	G	G	G	G	T	G	G	G	G
S1D_10955093	C/G	1D	10955093	+	C	C	C	G	C	C	C	C	C	C	C	C	C	C	C	C	G	G	C	C	C	C	C	C	C	C	C	C	C	C	C	C	C	G	C	C	C	C	C	C	G	C	C	C	C
S1D_11033914	G/A	1D	11033914	+	G	G	G	G	G	G	G	G	G	G	G	G	A	G	G	G	G	G	G	G	G	G	G	G	G	G	A	G	G	G	A	A	G	G	G	A	G	G	A	G	G	G	G	G	G
S1D_11231439	A/C	1D	11231439	+	C	A	A	A	C	A	C	C	C	C	C	A	C	A	C	C	A	A	C	A	A	A	A	A	A	A	C	A	A	C	A	A	C	A	C	C	A	C	A	C	A	C	C	C	A
S1D_11500513	C/T	1D	11500513	+	C	C	C	C	C	C	C	C	C	C	C	C	T	C	C	C	C	T	C	C	C	C	C	C	C	C	T	C	C	C	C	C	C	C	C	C	C	C	C	C	C	C	C	C	C
S1D_11500529	T/C	1D	11500529	+	T	T	T	T	T	T	T	T	T	T	T	T	T	T	T	T	T	T	T	T	T	T	T	T	T	T	T	T	T	T	C	C	T	T	T	C	T	T	C	T	T	T	T	T	T
S1D_11500739	A/G	1D	11500739	+	A	A	A	A	A	A	A	A	A	G	A	A	G	A	A	A	A	G	A	A	A	A	A	A	A	A	G	A	A	A	G	G	A	A	A	G	A	A	G	A	A	A	A	A	A
S1D_11528300	C/G	1D	11528300	+	C	C	C	C	C	C	S	C	C	C	S	C	C	C	S	S	C	C	C	C	C	C	C	C	C	C	C	C	C	C	C	C	S	C	C	C	C	S	C	C	C	C	C	S	C
S1D_11602344	C/T	1D	11602344	+	C	C	C	T	T	C	C	C	T	T	C	C	T	T	C	C	T	T	C	C	T	C	C	C	C	C	T	C	C	C	T	T	T	T	T	T	C	T	T	C	T	C	T	C	C
S1D_11604937	G/C	1D	11604937	+	G	G	G	G	S	G	S	S	S	S	G	G	G	G	G	G	G	G	C	G	G	G	G	G	G	G	S	G	G	S	G	G	G	G	G	G	G	S	G	G	G	G	G	G	G
S1D_11604941	G/T	1D	11604941	+	G	G	G	G	K	G	K	K	K	K	G	G	G	G	G	G	G	G	T	G	G	G	G	G	G	G	K	G	G	K	G	G	G	G	G	G	G	K	G	G	G	G	G	G	G
S1D_11685550	G/A	1D	11685550	+	G	G	G	G	G	G	G	G	G	R	G	G	G	G	G	G	G	G	G	G	R	G	G	G	G	G	G	G	G	G	A	G	G	G	G	R	G	G	R	G	G	G	R	G	G
S1D_11685572	A/G	1D	11685572	+	A	A	A	A	A	A	A	A	A	R	A	A	A	A	A	A	A	A	A	A	R	A	A	A	A	A	A	A	A	A	G	A	A	A	A	R	A	A	R	A	A	A	R	A	A
S1D_11685590	T/C	1D	11685590	+	T	T	T	T	T	T	T	T	T	Y	T	T	T	T	T	T	T	T	T	T	Y	T	T	T	T	T	T	T	T	T	C	T	T	T	T	Y	T	Y	Y	T	T	T	Y	T	T
S1D_11685593	T/A	1D	11685593	+	T	T	T	T	T	T	T	T	T	W	T	T	T	T	T	T	T	T	T	T	W	T	T	T	T	T	T	T	T	T	A	T	T	T	T	W	T	T	W	T	T	T	W	T	T
S1D_11774933	G/C	1D	11774933	+	G	G	G	G	G	G	G	G	G	S	G	G	G	G	G	G	G	G	G	G	G	G	G	G	G	G	S	G	G	G	S	G	G	G	G	S	G	G	S	G	G	G	S	G	G
S1D_11774989	G/A	1D	11774989	+	G	G	G	G	G	G	G	G	G	R	G	G	G	G	G	G	G	G	G	G	G	G	G	G	G	G	R	G	G	G	R	G	G	G	G	R	G	G	R	G	G	G	R	G	G
S1D_12012054	C/T	1D	12012054	+	C	C	C	C	C	C	C	C	Y	C	C	Y	C	C	C	C	C	C	C	Y	C	C	Y	C	C	C	C	C	C	C	C	C	Y	C	Y	C	Y	Y	C	C	C	C	C	C	C
S1D_12035706	C/G	1D	12035706	+	C	C	S	C	C	C	S	S	S	C	S	C	C	C	C	C	C	C	C	C	C	C	C	C	C	C	C	C	C	S	C	C	C	C	C	C	C	C	C	C	C	C	C	C	C
S1D_12247938	G/A	1D	12247938	+	R	G	G	R	G	R	G	R	G	G	G	G	G	G	G	G	G	R	G	G	G	G	R	G	G	G	G	G	G	G	G	G	G	R	G	G	R	G	G	G	R	R	G	G	G
S1D_12247950	G/T	1D	12247950	+	K	G	G	K	G	K	G	K	G	G	G	G	G	G	G	G	G	K	G	G	G	G	K	G	G	G	G	G	G	G	G	G	G	K	G	G	K	G	G	G	K	K	G	G	G
S1D_12247953	G/A	1D	12247953	+	G	G	R	G	G	G	R	R	R	G	R	G	G	G	G	G	G	G	G	G	G	G	G	G	G	G	G	G	G	G	G	G	G	G	G	G	G	R	G	G	G	G	G	R	G
S1D_12265674	T/C	1D	12265674	+	T	T	T	Y	T	T	T	T	T	T	T	T	T	T	T	T	T	T	T	T	T	T	T	Y	Y	T	T	T	T	T	T	T	Y	T	T	T	T	T	T	Y	T	T	T	T	T
S1D_12265688	A/T	1D	12265688	+	A	A	A	W	A	A	A	A	A	A	A	A	A	A	A	A	A	A	A	A	A	A	W	W	W	A	A	A	A	A	A	A	W	A	A	W	A	A	A	T	A	A	A	A	A
S1D_12265736	G/A	1D	12265736	+	G	G	G	R	G	G	G	G	G	G	G	G	G	G	G	G	G	G	G	G	G	G	R	R	R	G	G	G	G	G	G	G	R	G	G	R	G	G	G	A	G	G	G	G	G
S1D_12320202	C/A	1D	12320202	+	C	C	C	C	C	C	C	C	C	M	M	M	C	C	C	C	C	C	C	C	C	M	C	C	C	C	M	C	C	M	C	C	C	C	C	C	C	C	C	C	C	C	C	M	C
S1D_12320219	G/A	1D	12320219	+	G	R	G	G	G	G	G	G	G	G	G	G	G	G	G	G	G	R	G	G	G	G	G	G	G	G	G	G	G	G	G	R	G	G	G	G	G	G	G	G	G	G	G	G	G
S1D_12320230	T/C	1D	12320230	+	T	T	T	T	T	T	Y	C	Y	T	T	T	T	Y	Y	T	Y	T	Y	T	Y	T	T	T	T	T	T	Y	Y	T	T	T	T	T	T	Y	Y	T	T	T	T	T	T	T	C
S1D_12320240	C/T	1D	12320240	+	C	C	C	C	C	C	C	C	C	C	C	C	Y	C	C	C	C	Y	C	C	C	C	C	C	C	C	C	Y	C	C	Y	C	C	C	C	C	C	Y	C	C	C	C	C	Y	C
S1D_12320241	G/A	1D	12320241	+	G	G	G	R	R	R	G	G	G	G	G	G	G	G	G	G	G	R	G	G	G	G	G	R	G	R	G	R	G	G	G	G	G	G	G	G	G	G	G	G	G	G	R	G	G
S1D_12380593	G/A	1D	12380593	+	G	G	G	G	G	G	G	G	G	G	G	G	G	G	G	G	G	G	G	G	G	G	G	G	G	G	G	G	G	G	G	G	A	G	A	G	G	A	G	G	G	G	G	G	G
S1D_12512832	C/A	1D	12512832	+	M	C	C	M	C	C	C	C	C	C	C	C	C	C	C	C	C	C	M	C	C	C	M	M	M	C	C	C	C	C	C	C	M	C	C	A	C	C	C	M	C	M	C	M	C
S1D_12708513	A/G	1D	12708513	+	A	A	G	A	A	A	G	G	G	A	G	A	A	A	A	A	A	A	A	A	A	A	A	A	A	A	A	A	A	G	A	A	A	A	G	A	A	G	A	A	A	A	A	A	A
S1D_12880380	C/T	1D	12880380	+	C	C	C	C	C	C	C	C	T	C	C	C	C	C	C	C	C	C	C	C	C	C	C	C	C	C	C	C	C	C	C	C	C	C	C	C	C	C	C	C	C	C	C	C	C
S1D_12885079	C/T	1D	12885079	+	C	C	C	C	C	C	C	C	Y	C	C	Y	Y	Y	C	C	C	T	C	C	C	C	Y	C	C	C	Y	C	C	C	Y	C	C	C	C	C	C	C	Y	C	C	C	Y	C	C
S1D_12885113	A/T	1D	12885113	+	A	A	A	A	A	A	A	A	T	A	A	A	A	A	A	A	A	A	A	A	A	A	A	A	A	A	A	A	A	A	A	A	A	A	A	A	A	A	A	A	A	A	A	A	A
S1D_12885117	A/C	1D	12885117	+	A	C	A	C	A	A	A	M	C	A	A	C	C	C	A	A	M	C	A	C	A	A	C	A	A	A	C	A	A	A	C	C	M	A	A	C	M	M	C	A	A	A	M	A	A
S1D_12885133	A/G	1D	12885133	+	A	G	A	G	A	A	A	R	A	A	A	A	A	A	A	A	R	A	A	G	A	A	A	A	A	A	A	A	A	A	A	A	R	A	A	A	R	R	A	A	A	A	R	A	A
S1D_12885135	C/G	1D	12885135	+	C	C	C	C	C	C	C	C	G	C	C	G	G	G	C	C	C	G	C	C	C	C	G	C	C	C	G	C	C	C	G	G	C	C	C	G	C	C	G	C	C	C	C	C	C
S1D_12901373	C/A	1D	12901373	+	C	C	C	C	C	C	C	C	C	C	C	A	C	M	C	C	C	C	C	C	C	C	M	C	C	C	C	C	C	C	C	M	C	C	C	M	C	C	M	C	C	C	C	C	C
S1D_13012741	C/A	1D	13012741	+	C	C	C	M	M	C	M	C	M	C	C	M	C	C	C	C	C	C	C	C	C	C	M	M	C	C	C	C	C	C	C	C	C	M	C	C	C	C	C	C	M	C	C	C	C
S1D_13191813	G/T	1D	13191813	+	G	G	G	G	G	G	G	G	G	K	K	G	G	G	G	G	G	G	G	G	G	G	G	G	G	G	K	G	G	K	G	G	G	G	K	G	G	K	G	G	G	G	G	G	G
S1D_13268310	T/A	1D	13268310	+	T	T	T	T	T	T	A	T	A	T	T	A	T	A	T	T	T	T	T	T	T	T	A	A	T	T	T	T	T	T	T	T	A	T	A	T	T	A	T	T	T	T	T	T	T
S1D_13268323	G/A	1D	13268323	+	A	G	G	A	A	G	G	G	G	A	G	G	G	G	A	A	A	A	G	G	G	A	G	G	G	A	G	G	G	A	G	G	G	A	G	A	G	G	A	A	A	A	G	A	G
S1D_13268333	A/C	1D	13268333	+	A	A	A	A	A	C	A	A	A	A	A	A	A	A	A	A	A	A	A	A	A	A	A	A	A	A	A	A	A	A	A	A	A	A	A	A	A	A	A	A	A	A	A	A	A
S1D_13337652	G/A	1D	13337652	+	G	G	G	G	G	G	G	G	G	G	G	G	G	G	G	G	G	G	G	G	G	G	G	G	G	G	G	G	G	G	G	G	R	G	R	G	G	R	G	G	G	G	G	G	G
S1D_13340504	C/G	1D	13340504	+	G	C	C	G	G	C	C	C	C	S	C	C	C	C	G	G	G	G	C	C	C	G	C	C	C	G	G	C	C	G	G	C	C	G	C	G	C	C	G	G	G	G	C	G	C
S1D_13340505	G/T	1D	13340505	+	T	G	G	T	T	G	G	G	G	K	G	G	G	G	T	T	T	T	G	G	G	T	G	G	G	T	T	G	G	T	T	G	G	T	G	T	G	G	T	T	T	T	G	T	G
S1D_13344979	G/T	1D	13344979	+	G	G	G	G	G	T	G	G	G	G	G	G	G	G	G	G	G	G	G	G	G	G	G	G	G	G	G	G	G	G	G	G	G	G	G	G	G	G	G	G	G	G	G	G	G
S1D_13384893	A/T	1D	13384893	+	A	A	A	A	A	A	T	A	T	A	A	T	A	T	A	A	A	A	T	A	A	A	T	T	A	A	A	A	A	A	A	A	T	A	T	A	A	T	A	A	A	A	A	A	A
S1D_13512542	C/T	1D	13512542	+	C	C	C	C	C	T	C	C	C	C	C	C	C	C	C	C	C	C	C	C	C	C	C	C	C	C	C	C	C	C	C	C	C	C	C	C	C	C	C	C	C	C	C	C	C
S1D_13512573	T/C	1D	13512573	+	C	T	T	C	C	T	T	T	T	Y	T	T	T	T	C	C	C	C	T	T	T	C	T	T	T	C	T	T	T	C	T	T	T	C	T	C	T	T	C	C	C	C	T	C	T
S1D_13513217	T/C	1D	13513217	+	T	C	C	T	T	T	T	C	T	T	C	T	T	T	T	T	T	T	T	C	C	T	T	T	Y	T	T	Y	Y	T	T	T	T	T	T	T	T	T	T	T	T	T	T	T	Y
S1D_13726895	C/T	1D	13726895	+	C	C	C	C	C	T	C	C	C	T	C	C	T	C	C	C	C	T	C	C	C	C	C	C	C	C	T	C	C	C	T	T	C	C	C	T	C	C	Y	C	C	C	T	C	C
S1D_13777871	C/A	1D	13777871	+	C	C	C	C	C	C	C	C	C	M	C	C	M	C	C	C	C	M	C	C	C	C	C	C	C	C	M	C	C	C	M	M	C	C	C	M	C	C	M	C	C	M	M	C	C
S1D_13777887	G/A	1D	13777887	+	G	G	A	G	G	G	R	R	R	G	A	A	R	R	G	G	R	R	G	R	R	G	G	G	G	A	G	G	G	G	G	G	G	G	R	G	G	R	G	G	G	G	G	G	G
S1D_13777893	T/C	1D	13777893	+	T	T	C	T	T	T	Y	Y	Y	T	C	C	Y	Y	T	T	Y	Y	T	Y	Y	T	T	T	T	C	T	T	T	T	T	T	T	T	Y	T	T	Y	T	T	T	T	T	T	T
S1D_13778008	A/T	1D	13778008	+	A	A	A	A	A	A	A	A	A	W	A	A	T	A	A	A	A	T	A	A	A	A	A	A	A	A	T	A	A	A	T	T	A	A	A	T	A	A	T	A	A	A	T	A	A
S1D_13778016	G/C	1D	13778016	+	G	G	G	G	G	G	G	G	G	S	G	G	C	G	G	G	G	C	G	G	G	G	G	G	G	G	C	G	G	G	C	C	G	G	G	C	G	G	C	G	G	G	C	G	G
S1D_13778052	C/T	1D	13778052	+	C	C	C	C	C	C	C	C	C	Y	C	C	T	C	C	C	C	T	C	C	C	C	C	C	C	C	T	C	C	C	T	T	C	C	C	T	C	C	T	C	C	C	T	C	C
S1D_14000495	G/A	1D	14000495	+	G	R	G	G	R	R	G	G	G	R	G	G	G	G	G	R	G	G	R	G	G	G	G	G	G	G	G	G	G	G	G	G	G	G	G	G	G	G	G	G	G	G	R	R	G
S1D_14000543	C/G	1D	14000543	+	C	S	C	C	C	C	S	C	C	C	C	C	C	C	C	C	C	C	C	C	C	C	C	C	C	S	C	C	C	C	S	C	S	C	C	S	C	C	C	C	C	C	C	C	S
S1D_14022516	G/A	1D	14022516	+	G	G	G	G	G	G	G	G	R	R	G	G	G	G	G	G	G	G	G	G	G	G	G	R	R	G	G	G	G	G	G	G	R	G	G	R	G	G	G	G	G	G	G	G	G
S1D_14031249	G/A	1D	14031249	+	G	G	R	G	G	G	G	G	R	G	G	G	G	G	G	G	G	G	G	G	G	R	G	G	G	G	R	G	G	G	G	G	G	G	G	G	G	G	G	G	G	R	G	G	G
S1D_14031284	C/G	1D	14031284	+	C	C	C	C	S	C	C	C	C	C	C	C	S	C	C	C	C	G	C	C	C	S	C	C	C	C	C	C	C	C	C	S	C	S	C	S	C	C	S	C	G	C	S	C	C
S1D_14034103	C/T	1D	14034103	+	C	C	C	C	C	C	Y	C	C	C	C	C	C	C	C	C	C	C	C	C	C	Y	C	C	C	C	C	Y	C	C	C	C	C	C	C	Y	C	C	C	C	Y	C	C	C	C
S1D_14034104	G/A	1D	14034104	+	G	G	A	G	G	G	G	R	G	R	R	G	G	G	G	G	G	G	G	G	G	G	G	G	G	R	A	G	R	G	G	G	R	G	G	R	G	R	G	G	G	R	R	G	G
S1D_14034111	G/A	1D	14034111	+	G	G	G	G	G	R	R	G	G	G	R	G	G	G	G	R	R	G	G	G	G	R	R	G	G	G	G	R	G	G	G	R	G	G	G	R	G	R	R	G	G	G	G	G	G
S1D_14034112	A/G	1D	14034112	+	A	A	A	A	A	A	A	A	A	A	R	A	A	A	A	A	A	A	A	A	A	A	A	A	A	A	A	A	A	A	R	R	A	A	A	A	A	A	A	G	A	A	A	A	R
S1D_14034118	C/T	1D	14034118	+	Y	C	C	C	Y	C	C	C	C	C	C	C	Y	C	C	C	Y	C	C	C	C	C	C	C	C	C	C	C	Y	C	C	C	C	C	C	C	Y	C	C	C	Y	C	C	C	C
S1D_14038090	G/A	1D	14038090	+	A	A	G	G	A	A	G	G	G	A	A	A	A	A	A	A	A	A	A	A	A	A	A	A	A	A	G	A	G	A	G	G	A	G	A	A	G	A	G	A	G	A	A	A	G
S1D_14038711	C/T	1D	14038711	+	C	C	Y	C	C	C	C	Y	C	C	C	C	C	C	C	C	C	C	C	Y	C	C	C	C	Y	C	C	T	C	C	C	C	C	C	C	C	Y	C	C	C	C	C	C	C	C
S1D_14086653	A/G	1D	14086653	+	A	A	A	A	A	A	R	A	A	A	A	A	A	A	A	R	A	A	A	R	A	A	A	A	A	A	A	A	A	A	A	R	A	G	A	R	A	A	A	A	A	A	A	A	A
S1D_14086659	C/T	1D	14086659	+	C	C	C	C	C	C	Y	C	C	C	C	C	C	C	C	Y	C	C	C	Y	C	C	C	C	C	C	C	C	C	C	C	Y	C	T	C	Y	C	C	C	C	C	C	C	C	C
S1D_14086686	T/C	1D	14086686	+	T	T	T	T	T	T	Y	T	T	T	T	T	T	T	T	Y	T	T	T	Y	T	T	T	T	T	T	T	T	T	T	T	Y	T	C	T	Y	T	T	T	T	T	T	T	T	T
S1D_14267864	T/A	1D	14267864	+	A	A	A	T	A	T	T	A	T	W	A	T	T	T	T	T	A	T	T	W	A	W	T	T	W	A	T	W	W	A	T	T	T	A	T	T	W	T	T	A	W	W	T	A	A
S1D_14344379	C/T	1D	14344379	+	C	C	C	C	C	Y	C	C	C	Y	C	Y	C	C	C	Y	C	C	Y	C	C	C	Y	C	C	C	C	C	C	C	C	C	C	C	Y	C	C	C	C	C	C	C	C	C	Y
S1D_14344380	G/A	1D	14344380	+	G	G	G	G	G	R	G	G	G	R	G	R	G	G	G	R	G	G	R	R	G	G	R	G	R	G	G	G	G	G	G	G	G	G	R	G	G	G	G	G	G	G	G	G	R
S1D_14344386	C/T	1D	14344386	+	C	C	C	C	C	C	C	C	C	C	C	C	C	C	C	C	C	C	C	C	C	C	C	C	C	Y	C	C	C	C	C	C	C	C	C	C	C	C	C	C	C	C	C	C	C
S1D_14344388	G/A	1D	14344388	+	G	G	G	G	G	G	G	G	G	G	G	G	G	R	G	G	G	G	G	G	G	G	R	G	G	G	R	R	G	G	G	G	G	G	G	G	R	R	G	G	R	R	G	G	G
S1D_14411197	G/A	1D	14411197	+	G	G	G	G	G	G	G	G	G	G	G	G	G	G	G	G	G	G	G	G	G	G	G	G	G	G	G	G	G	G	A	A	G	G	G	A	G	G	A	G	G	G	A	G	G
S1D_14411213	G/C	1D	14411213	+	G	G	G	G	G	C	G	G	C	G	G	C	G	G	G	G	G	G	G	G	G	G	C	G	G	G	G	G	G	G	G	G	G	G	G	G	G	G	G	G	G	G	G	G	G
S1D_15135910	C/T	1D	15135910	+	T	T	T	T	T	C	C	T	C	T	T	C	C	C	T	T	T	C	T	C	C	T	C	C	T	T	C	T	T	T	C	C	C	T	C	C	C	C	C	T	T	T	C	T	T
S1D_15277896	G/A	1D	15277896	+	G	G	G	G	G	R	G	G	G	G	G	G	G	G	G	G	G	G	G	G	G	G	G	G	G	G	R	G	G	G	G	G	G	G	G	R	R	R	G	G	G	G	G	G	G
S1D_15277919	C/T	1D	15277919	+	C	C	C	C	C	C	C	C	C	C	C	C	T	C	C	C	C	Y	C	C	C	C	C	C	C	C	Y	C	C	C	Y	Y	C	C	C	Y	C	C	Y	C	C	C	Y	C	C
S1D_15954589	A/C	1D	15954589	+	C	C	C	C	C	A	A	C	A	C	C	A	A	A	C	C	C	A	C	A	A	C	A	A	C	C	A	C	C	C	A	A	A	C	A	A	A	A	A	C	C	C	A	C	C
S1D_15954607	G/A	1D	15954607	+	A	A	A	A	A	G	G	A	G	A	A	G	G	G	A	A	A	G	A	G	G	A	G	G	A	A	G	A	A	A	G	G	G	A	G	G	G	G	G	A	A	A	G	A	A
S1D_15954628	C/T	1D	15954628	+	C	C	C	C	C	C	C	C	C	C	C	C	C	C	C	C	C	C	C	C	C	C	C	C	C	C	C	C	C	C	T	T	C	C	C	T	C	C	T	C	C	C	C	C	C
S1D_15954637	T/C	1D	15954637	+	C	C	C	C	C	T	T	C	T	C	C	T	T	T	C	C	C	T	C	T	T	C	T	T	C	C	T	C	C	C	T	T	T	C	T	T	T	T	T	C	C	C	T	C	C
S1D_16327458	G/T	1D	16327458	+	G	G	K	G	G	G	G	G	G	G	G	G	G	G	K	G	G	K	G	G	G	G	G	G	G	G	G	G	G	K	G	G	G	G	G	G	G	G	G	G	K	G	G	G	G
S1D_16327486	C/T	1D	16327486	+	C	C	C	C	C	C	C	C	C	C	C	C	C	Y	C	C	C	C	C	C	C	C	C	C	C	C	C	C	C	C	C	C	C	C	C	C	C	C	C	C	C	C	C	C	C
S1D_16327491	A/T	1D	16327491	+	A	W	A	A	W	W	A	A	A	A	A	A	A	A	A	A	W	A	A	A	A	A	A	A	A	A	A	A	A	W	W	A	A	A	A	A	A	A	A	A	A	W	A	A	A
S1D_16334185	G/C	1D	16334185	+	G	G	G	G	G	G	G	G	G	G	G	G	G	G	G	G	G	G	G	G	G	G	G	G	G	G	G	G	G	G	G	C	G	G	G	C	G	G	C	G	G	G	G	G	G
S1D_16334221	T/C	1D	16334221	+	T	T	T	T	T	T	T	T	T	T	T	T	T	T	T	T	T	T	T	T	T	T	T	T	T	T	T	T	T	T	T	C	C	T	C	C	T	C	C	T	T	T	T	T	T
S1D_16334224	G/C	1D	16334224	+	G	G	G	G	G	G	G	G	G	C	G	G	G	G	C	C	G	G	G	G	G	C	G	G	G	C	G	G	G	G	G	G	G	G	G	G	G	G	G	G	G	G	G	G	G
S1D_16362175	C/T	1D	16362175	+	C	C	C	C	C	C	C	C	C	T	C	C	C	C	T	T	C	C	C	C	C	T	C	C	C	T	C	C	C	C	C	C	C	C	C	C	C	C	C	C	C	C	C	C	C
S1D_16362193	A/G	1D	16362193	+	A	R	A	A	A	G	A	A	A	G	A	A	G	A	G	G	A	G	A	A	A	G	A	A	A	G	G	A	A	A	G	G	G	A	G	G	A	G	G	A	A	A	G	A	A
S1D_16362238	A/G	1D	16362238	+	A	A	A	A	A	G	A	A	A	R	A	A	A	A	G	G	A	A	A	A	A	G	A	A	A	G	A	A	A	A	A	A	A	A	A	A	A	A	A	A	A	A	A	A	A
S1D_16362246	C/A	1D	16362246	+	C	C	C	C	C	C	C	C	C	C	C	C	C	C	C	C	C	C	C	C	C	C	C	C	C	C	C	C	C	C	C	A	C	C	C	A	C	C	A	C	C	C	C	C	C
S1D_16406399	G/A	1D	16406399	+	G	G	G	G	G	R	G	G	G	G	G	G	G	G	G	G	G	G	G	G	G	G	G	R	G	G	G	G	G	G	G	G	G	G	G	G	G	G	G	G	G	G	G	G	G
S1D_16406404	T/C	1D	16406404	+	T	T	T	T	T	Y	T	T	T	T	T	T	T	T	T	T	T	T	T	T	T	T	T	Y	T	T	T	T	T	T	T	T	T	T	T	T	T	T	T	T	T	T	T	T	T
S1D_16666722	C/T	1D	16666722	+	C	C	C	C	C	C	T	C	C	C	C	C	C	C	C	C	C	C	T	C	C	C	C	T	C	C	C	C	C	C	C	C	C	C	C	C	C	C	C	C	C	C	C	C	C
S1D_16666732	G/A	1D	16666732	+	G	G	G	G	G	A	G	G	G	G	G	G	G	G	G	G	G	G	G	G	G	G	G	G	G	G	G	G	G	G	G	G	G	G	G	G	G	G	G	G	G	G	G	G	G
S1D_16668290	G/T	1D	16668290	+	G	G	G	T	T	G	T	G	G	G	G	G	T	T	T	T	T	T	T	G	G	T	G	T	G	T	T	G	G	G	T	T	T	T	T	T	G	T	T	G	T	G	T	G	G
S1D_16677968	G/A	1D	16677968	+	G	G	G	G	G	R	G	G	G	G	G	G	G	G	A	R	G	G	G	G	G	G	G	G	G	R	G	G	G	G	G	G	G	G	G	G	G	G	G	G	G	G	G	G	G
S1D_17305959	G/A	1D	17305959	+	R	G	G	A	A	A	A	G	G	G	G	A	A	A	A	A	A	A	G	A	G	A	A	A	G	A	A	G	G	G	A	A	G	A	G	A	A	G	A	G	A	G	G	G	G
S1D_17305970	G/C	1D	17305970	+	G	C	C	G	G	G	G	C	G	G	C	G	G	G	G	G	G	G	G	G	G	G	G	G	C	G	G	C	C	G	G	G	C	G	C	G	G	C	G	G	G	G	G	G	C
S1D_17305971	C/T	1D	17305971	+	C	T	T	C	C	C	C	T	C	C	T	C	C	C	C	C	C	C	C	C	C	C	C	C	T	C	C	T	T	C	C	C	T	C	T	C	C	T	C	C	C	C	C	C	T
S1D_17305976	T/A	1D	17305976	+	T	T	T	T	T	T	T	T	T	T	T	T	T	W	T	T	T	T	T	W	T	T	W	W	T	T	W	T	T	T	T	T	T	T	T	T	T	T	T	T	T	T	T	T	T
S1D_17305990	A/T	1D	17305990	+	A	A	A	A	A	A	A	A	A	A	A	A	A	A	A	A	A	A	A	A	A	A	A	A	A	A	A	A	A	A	A	A	A	A	A	A	A	A	A	A	A	A	A	A	A
S1D_17368883	A/G	1D	17368883	+	A	A	A	G	G	G	G	A	A	A	A	G	G	G	G	G	G	G	A	G	A	G	G	G	A	G	G	A	A	A	G	A	A	G	A	A	G	A	A	A	G	A	A	A	A
S1D_17368901	T/C	1D	17368901	+	T	T	T	C	C	T	T	T	T	T	T	C	C	T	C	C	C	C	T	T	T	C	C	T	T	C	C	T	T	T	C	T	T	C	T	T	T	T	T	T	C	T	T	T	T
S1D_17433460	G/T	1D	17433460	+	G	G	K	K	G	G	G	G	K	G	G	K	G	G	G	G	G	G	G	G	G	K	G	G	G	G	K	G	G	G	G	G	G	K	G	G	G	K	G	G	G	G	G	G	G
S1D_17467820	A/T	1D	17467820	+	A	T	T	A	A	A	A	T	A	A	T	A	A	A	A	A	A	A	A	A	A	A	A	A	T	A	A	T	W	A	A	A	T	A	T	A	A	T	A	A	A	A	A	A	T
S1D_17495727	C/A	1D	17495727	+	C	C	C	A	M	C	C	C	C	C	C	C	C	C	M	M	M	C	C	C	C	M	C	C	C	M	C	C	C	C	M	M	C	A	C	M	C	C	A	C	M	C	C	C	C
S1D_17815264	G/A	1D	17815264	+	G	G	G	G	G	G	G	G	G	G	G	G	G	G	R	R	G	G	G	G	G	R	G	G	G	R	R	G	G	G	G	G	A	G	R	G	G	R	G	G	G	G	G	G	G
S1D_17914059	C/G	1D	17914059	+	C	C	C	C	C	S	C	G	C	S	S	C	S	S	S	S	C	C	C	C	C	C	C	C	C	S	C	S	C	S	C	C	C	C	C	C	C	S	C	S	C	C	C	C	C
S1D_17914566	G/A	1D	17914566	+	G	G	G	G	G	G	G	G	G	G	G	G	A	G	A	A	G	A	G	G	G	A	G	G	G	A	A	G	G	G	G	G	G	G	G	G	G	G	G	G	G	G	G	G	G
S1D_17914585	G/A	1D	17914585	+	G	G	G	G	G	G	G	G	G	G	G	G	A	G	A	A	G	A	G	G	G	A	G	G	G	A	A	G	G	G	G	G	G	G	G	G	G	G	G	G	G	G	G	G	G
S1D_17915967	C/A	1D	17915967	+	C	C	C	C	C	A	C	C	C	C	C	C	C	A	C	C	C	C	A	C	C	C	C	C	C	C	C	C	C	C	C	C	A	C	A	C	C	A	C	C	C	C	C	C	C
S1D_18041339	G/A	1D	18041339	+	G	G	G	G	G	G	G	G	R	G	G	G	R	G	G	G	G	R	G	R	R	G	G	G	G	G	G	G	G	G	G	G	G	G	G	R	A	G	R	G	G	G	G	G	G
S1D_18121347	C/T	1D	18121347	+	C	T	T	C	C	C	C	T	C	C	T	T	C	C	C	C	C	C	C	C	C	C	T	C	T	C	C	T	T	C	C	C	C	C	C	C	C	C	C	C	C	C	T	C	T
S1D_18181689	C/T	1D	18181689	+	C	C	C	C	C	C	C	C	C	C	C	C	T	C	C	C	C	T	C	C	C	C	C	C	C	C	T	C	C	C	T	T	C	C	C	T	C	C	T	C	C	C	C	C	C
S1D_18181695	G/C	1D	18181695	+	G	G	G	G	G	G	G	G	G	G	G	G	C	C	G	G	G	C	G	G	G	G	G	G	G	G	C	G	G	G	C	C	G	G	G	C	G	G	C	G	G	G	G	G	G
S1D_19015089	G/A	1D	19015089	+	G	G	G	G	G	G	G	G	G	G	G	G	G	G	G	G	G	G	G	G	G	G	G	G	G	G	G	G	G	G	G	G	A	G	A	G	G	A	G	G	G	G	G	G	G
S1D_19015102	A/G	1D	19015102	+	A	G	G	A	A	A	A	G	A	A	G	A	G	A	A	A	A	G	A	A	A	A	A	A	G	A	G	G	G	A	G	G	A	A	A	G	A	A	G	A	A	A	A	A	G
S1D_19015113	C/G	1D	19015113	+	C	G	G	C	C	C	C	G	C	C	G	C	C	C	C	C	C	C	C	C	C	C	C	C	G	C	C	G	G	C	C	C	C	C	C	C	C	C	C	C	C	C	C	C	G
S1D_19189122	G/A	1D	19189122	+	G	G	A	G	G	G	G	R	G	G	R	G	G	G	G	G	G	G	G	G	G	G	G	G	R	G	G	R	R	G	G	G	G	G	G	G	G	G	G	G	G	G	G	G	G
S1D_19209790	C/T	1D	19209790	+	C	C	Y	C	Y	C	Y	Y	Y	C	C	C	Y	Y	C	C	C	Y	Y	Y	Y	C	C	C	C	C	C	C	C	C	C	C	C	C	C	C	C	Y	C	C	C	C	Y	Y	C
S1D_19209823	G/A	1D	19209823	+	G	G	G	R	R	G	R	G	R	G	G	G	G	G	G	G	A	G	G	G	G	G	G	R	G	G	G	G	G	G	G	G	A	R	R	G	G	G	G	G	G	G	G	G	G
S1D_19481071	G/A	1D	19481071	+	G	G	G	G	G	G	G	G	G	G	G	G	G	G	G	G	G	G	G	G	G	G	G	G	G	G	G	G	G	G	G	G	A	G	A	G	G	A	G	G	G	G	G	G	G
S1D_19481123	A/G	1D	19481123	+	A	A	A	A	A	A	A	A	A	A	A	A	A	A	A	A	A	A	A	A	A	A	A	A	A	A	A	A	A	A	A	A	G	A	G	A	A	G	A	A	A	A	A	A	A
S1D_19483859	C/T	1D	19483859	+	T	C	C	C	C	C	C	C	C	C	C	C	C	C	T	T	C	C	C	C	C	T	C	C	C	Y	C	C	C	T	C	C	C	C	C	C	C	C	C	T	C	T	C	T	C
S1D_19483866	C/T	1D	19483866	+	C	C	C	C	C	C	C	C	C	C	C	C	C	C	C	C	C	C	C	C	C	C	C	C	C	C	C	C	C	C	C	C	T	C	T	C	C	T	C	C	C	C	C	C	C
S1D_19602159	G/C	1D	19602159	+	G	C	C	G	G	G	G	C	G	G	C	G	G	G	G	G	G	G	G	G	G	G	G	G	C	G	G	C	C	G	G	G	G	G	G	G	G	G	G	G	G	G	G	G	C
S1D_19602201	G/A	1D	19602201	+	A	A	A	G	G	G	G	A	G	R	A	A	A	G	A	A	G	G	G	G	G	A	A	G	A	A	G	A	A	A	G	G	G	G	G	G	G	G	G	A	G	A	G	A	A
S1D_19602206	C/T	1D	19602206	+	C	C	C	C	C	T	Y	C	C	C	C	C	C	Y	C	C	C	C	C	C	Y	C	C	T	C	C	C	C	C	C	C	C	C	C	C	C	C	C	C	C	C	C	C	C	C
S1D_20064780	G/C	1D	20064780	+	G	G	G	G	G	G	G	G	G	S	S	G	G	G	G	S	G	G	G	G	G	G	G	G	G	G	G	G	G	S	G	S	G	G	G	G	S	G	G	G	S	G	G	G	S
S1D_20064823	T/G	1D	20064823	+	T	T	T	K	T	T	T	T	T	T	K	T	T	T	T	T	K	T	K	T	T	T	T	T	T	T	T	T	T	T	T	T	T	T	T	T	T	T	T	T	T	T	T	K	T
S1D_20170182	A/G	1D	20170182	+	A	A	A	A	A	A	A	R	A	A	A	A	A	A	A	A	A	A	R	A	A	A	R	A	A	R	A	A	A	A	A	A	A	A	A	R	A	A	A	A	A	R	A	A	A
S1D_20170188	G/A	1D	20170188	+	G	G	G	G	G	G	G	R	G	G	G	G	G	G	G	G	G	G	R	G	G	G	R	G	G	R	G	G	G	G	G	G	G	G	G	R	G	G	G	G	G	R	G	G	G
S1D_20289710	C/G	1D	20289710	+	C	G	G	C	C	G	G	G	G	C	G	G	C	G	C	C	C	C	G	G	C	C	G	G	G	C	C	G	G	C	C	C	C	C	C	C	G	C	C	C	C	C	G	C	G
S1D_20289730	T/C	1D	20289730	+	T	T	T	T	T	T	T	T	T	Y	T	T	T	T	C	C	T	T	T	T	C	C	T	T	T	C	T	T	T	T	T	T	T	T	T	T	T	T	T	T	T	T	T	T	T
S1D_20341085	G/A	1D	20341085	+	R	G	G	R	R	G	G	G	G	G	G	G	R	G	G	G	R	G	G	G	G	G	G	G	G	G	G	G	G	R	G	G	G	R	G	G	G	G	G	G	R	R	G	G	G
S1D_20361501	G/A	1D	20361501	+	G	G	G	G	G	G	G	G	G	G	G	G	G	G	A	A	G	G	G	G	G	A	G	G	G	A	G	G	G	G	G	G	G	G	G	G	G	G	G	G	G	G	G	G	G
S1D_20410258	G/A	1D	20410258	+	G	G	G	G	G	G	G	G	G	G	G	G	G	G	G	G	G	G	G	G	G	G	G	G	G	G	G	G	G	G	G	A	G	G	G	G	G	G	G	G	G	G	G	G	G
S1D_20435432	A/G	1D	20435432	+	A	A	A	A	A	A	A	A	A	A	A	A	A	A	R	A	A	A	A	R	A	A	A	A	A	A	A	A	A	A	A	A	A	R	A	A	G	A	A	A	A	A	A	A	A
S1D_20435468	C/T	1D	20435468	+	C	T	T	C	C	T	C	T	C	C	T	C	C	T	C	C	C	C	C	C	C	C	C	C	T	C	C	T	T	C	C	C	C	C	C	C	C	C	C	C	C	C	C	C	T
S1D_20467015	A/G	1D	20467015	+	G	A	G	A	G	G	G	G	A	A	G	A	G	A	G	G	A	A	G	A	A	G	G	G	G	A	G	G	A	G	R	A	G	A	G	G	A	G	A	G	A	G	G	G	A
S1D_20844738	A/G	1D	20844738	+	A	A	A	R	A	A	A	A	R	A	A	A	A	A	A	A	A	A	A	A	A	A	A	A	R	A	A	A	A	A	A	R	A	A	A	R	R	A	A	A	A	A	A	A	A
S1D_20844751	C/T	1D	20844751	+	C	C	C	Y	C	C	C	C	Y	C	C	C	C	C	C	C	C	C	C	C	C	C	C	C	Y	C	C	C	C	C	C	Y	C	C	C	Y	Y	C	C	C	C	C	C	C	C
S1D_20844753	C/G	1D	20844753	+	C	C	C	C	C	C	C	C	C	C	C	C	C	C	S	S	C	C	C	C	C	S	C	C	S	C	C	S	C	C	C	C	C	C	C	C	C	C	C	C	C	C	C	C	C
S1D_20844761	C/T	1D	20844761	+	C	C	C	C	C	C	C	C	C	C	C	C	C	C	Y	C	C	C	C	C	C	C	C	C	C	C	Y	C	Y	Y	Y	C	C	C	C	C	C	Y	C	C	C	C	C	C	C
S1D_20844778	C/A	1D	20844778	+	C	C	C	C	C	C	C	C	C	C	C	C	C	C	M	M	C	C	C	C	C	M	C	C	M	C	C	M	C	C	C	C	C	C	C	C	C	C	C	C	C	C	C	C	C
S1D_20844784	C/T	1D	20844784	+	C	C	C	Y	C	C	Y	C	Y	C	C	C	C	C	C	C	C	C	C	C	C	C	C	C	C	C	Y	C	C	C	Y	C	C	C	C	C	Y	C	C	C	C	Y	C	Y	Y
S1D_21492647	A/T	1D	21492647	+	A	A	A	T	T	A	A	A	A	A	A	A	A	T	T	T	T	T	T	A	A	T	A	A	A	T	T	A	A	A	T	T	T	T	T	T	A	T	T	A	T	A	T	A	A
S1D_21831838	A/G	1D	21831838	+	A	A	A	A	A	R	A	A	A	R	A	A	A	A	A	A	A	A	A	A	A	A	A	A	A	A	A	A	A	A	A	A	A	A	A	A	A	A	A	A	A	A	A	A	A
S1D_22077073	C/A	1D	22077073	+	C	C	C	C	C	C	C	C	C	C	C	C	C	C	C	C	C	C	C	C	C	C	C	C	C	C	C	C	C	M	C	C	C	M	C	C	C	C	M	C	C	M	C	C	C
S1D_22077102	C/G	1D	22077102	+	C	C	C	C	C	C	C	C	C	C	C	C	C	C	C	C	C	S	C	C	C	C	C	C	C	C	S	C	C	C	S	C	C	S	S	C	C	C	C	C	C	C	C	C	C
S1D_22182690	C/T	1D	22182690	+	C	C	C	C	C	Y	C	Y	Y	C	C	C	C	Y	C	C	C	C	C	C	C	C	C	C	C	C	C	C	C	C	C	C	C	C	C	C	C	C	C	C	C	C	C	C	C
S1D_22182701	G/T	1D	22182701	+	K	G	G	G	G	G	G	G	G	G	G	K	K	G	G	G	G	G	G	G	G	G	G	G	G	G	G	G	G	T	G	G	G	G	G	G	G	G	G	G	G	K	G	K	G
S1D_22265918	A/C	1D	22265918	+	C	C	C	A	A	C	A	C	C	C	C	C	C	C	A	A	A	A	A	A	A	A	C	A	C	A	A	C	C	C	A	A	A	A	A	A	A	A	A	C	A	C	A	C	C
S1D_22265934	C/A	1D	22265934	+	A	C	C	C	C	C	C	C	C	C	C	A	A	C	C	C	C	C	C	C	C	C	A	C	C	C	C	C	C	A	C	C	C	C	C	C	C	C	C	A	C	A	C	A	C
S1D_22265936	C/T	1D	22265936	+	T	T	T	C	C	T	C	T	T	T	T	T	T	T	C	C	C	C	C	C	C	C	T	C	T	C	C	T	T	T	C	C	C	C	C	C	C	C	C	T	C	T	C	T	T
S1D_22266017	G/A	1D	22266017	+	G	G	G	G	G	G	G	G	G	G	G	G	G	G	G	G	G	A	G	G	G	G	G	G	G	G	A	G	G	G	G	G	G	G	G	A	G	G	A	G	G	G	G	G	G
S1D_22266021	T/C	1D	22266021	+	T	C	C	T	T	C	T	C	C	C	C	T	T	T	T	T	T	T	T	T	T	T	T	T	C	T	T	C	C	T	T	T	T	T	T	T	T	T	T	T	T	T	T	T	C
S1D_22322344	C/A	1D	22322344	+	A	C	C	A	A	C	C	C	C	M	C	A	A	C	C	C	A	A	C	C	C	C	A	C	C	C	A	C	C	A	A	A	A	A	A	A	C	A	A	A	A	A	C	A	C
S1D_22479411	G/C	1D	22479411	+	G	G	G	G	G	G	G	G	C	C	G	G	G	G	C	C	G	G	G	C	G	C	G	G	G	C	G	G	G	G	G	G	G	G	G	G	C	G	G	G	G	G	G	G	G
S1D_22482299	C/G	1D	22482299	+	C	C	C	C	C	S	C	C	C	C	C	C	C	C	C	C	C	C	C	C	S	C	C	C	C	C	C	C	C	C	C	C	C	C	C	C	C	C	C	C	C	C	S	C	C
S1D_22553486	C/T	1D	22553486	+	C	Y	Y	C	C	C	C	C	C	C	C	C	C	C	C	C	C	C	Y	C	C	C	C	C	C	C	C	C	Y	C	C	C	C	C	C	C	C	C	C	C	C	C	T	C	C
S1D_22553488	C/T	1D	22553488	+	C	C	C	C	C	C	C	C	C	C	C	C	C	C	C	Y	Y	C	C	Y	C	C	C	C	Y	C	C	C	C	C	Y	C	C	C	C	C	C	Y	Y	C	C	C	C	C	C
S1D_22628178	T/A	1D	22628178	+	T	T	T	T	T	T	T	T	W	W	T	T	T	T	W	W	T	T	T	W	T	W	T	T	T	W	T	T	T	T	T	T	T	T	T	T	A	T	T	T	T	T	T	T	T
S1D_22736783	G/T	1D	22736783	+	G	T	G	T	G	G	G	G	T	G	G	T	G	T	K	G	T	T	G	T	K	G	G	G	G	T	G	G	T	G	T	T	G	T	G	G	T	G	T	G	T	G	G	G	T
S1D_22736784	C/A	1D	22736784	+	C	C	C	C	C	C	C	C	C	C	C	C	C	C	C	C	C	C	C	C	M	C	C	C	M	C	M	M	C	C	C	C	C	C	C	C	C	C	C	M	C	C	M	C	C
S1D_22774721	C/T	1D	22774721	+	T	C	C	C	C	C	C	C	C	C	C	C	C	C	Y	C	C	C	C	C	C	C	C	C	Y	C	Y	C	Y	C	C	C	C	C	Y	C	C	C	C	C	C	C	C	C	C
S1D_22774754	C/A	1D	22774754	+	C	C	C	C	C	C	C	C	C	C	C	C	C	M	C	M	M	C	C	M	M	C	C	C	C	C	C	M	M	M	C	C	C	C	C	C	C	C	C	C	C	C	C	C	C
S1D_22824307	C/T	1D	22824307	+	C	C	C	T	C	C	C	C	C	C	C	Y	C	C	C	C	C	Y	C	C	Y	C	Y	C	C	C	C	C	C	C	C	Y	T	Y	C	C	C	C	C	C	C	C	C	C	C
S1D_22824310	A/G	1D	22824310	+	A	A	A	A	G	A	A	A	R	A	A	R	A	A	R	A	A	R	A	R	A	A	A	A	A	A	A	A	A	A	A	R	A	A	R	A	A	A	A	A	A	A	A	A	A
S1D_22824317	G/C	1D	22824317	+	G	G	G	G	C	G	G	G	S	G	G	S	G	G	S	G	G	S	G	S	G	G	G	G	G	G	G	G	G	G	G	S	G	G	S	G	G	G	G	G	G	G	G	G	G
S1D_23157030	T/C	1D	23157030	+	T	T	T	T	T	T	T	T	T	T	Y	T	T	T	T	Y	T	T	T	T	T	T	T	T	T	T	T	T	T	T	T	T	T	T	Y	T	T	T	T	T	T	T	T	T	T
S1D_23157050	G/A	1D	23157050	+	G	G	G	G	G	G	G	G	G	G	G	G	G	R	G	G	G	G	G	G	G	G	R	G	G	G	G	G	G	G	G	G	G	G	G	G	G	G	G	G	G	G	G	G	G
S1D_23214345	G/A	1D	23214345	+	G	G	R	G	G	G	R	G	G	G	G	G	G	G	G	G	G	G	G	G	G	G	G	G	G	G	G	G	G	R	R	G	G	G	A	G	G	G	R	G	G	G	G	G	R
S1D_23232921	T/C	1D	23232921	+	T	T	T	Y	T	T	T	T	Y	T	T	T	T	T	T	T	Y	T	T	T	T	T	T	T	T	T	T	T	T	T	T	Y	T	T	T	T	T	T	T	T	T	T	T	T	T
S1D_23264281	C/A	1D	23264281	+	M	C	C	C	M	C	C	C	C	C	C	C	C	C	M	C	C	C	C	C	M	C	M	C	C	M	C	C	C	C	C	C	C	C	M	C	C	C	M	C	M	C	M	C	C
S1D_23313457	C/T	1D	23313457	+	C	C	C	C	C	C	C	C	T	Y	C	C	C	C	T	T	C	C	C	C	C	T	C	C	C	T	C	C	C	C	C	C	C	C	C	C	C	C	C	C	C	C	C	C	C
S1D_23519113	T/C	1D	23519113	+	Y	T	T	T	T	T	T	Y	T	T	T	T	Y	T	T	T	T	T	T	T	T	T	T	Y	Y	T	T	T	T	Y	T	T	T	T	Y	T	T	T	T	Y	T	Y	Y	T	T
S1D_23762770	G/A	1D	23762770	+	R	G	G	G	R	G	G	R	G	G	G	G	G	G	G	G	G	G	G	G	G	G	G	G	G	G	G	G	R	R	G	G	G	R	A	G	G	G	G	R	G	R	G	G	G
S1D_23897598	T/C	1D	23897598	+	T	T	T	T	T	T	T	T	T	T	T	T	T	T	T	T	T	T	T	T	T	T	T	T	T	T	T	T	T	T	T	T	Y	T	C	T	T	Y	T	T	T	T	T	T	T
S1D_24100128	G/A	1D	24100128	+	G	G	G	R	R	G	G	G	G	G	G	G	G	G	G	G	R	G	G	G	G	G	G	G	G	G	G	G	G	G	G	G	G	G	G	G	G	R	G	G	R	G	G	R	G
S1D_25000892	G/A	1D	25000892	+	G	G	G	G	G	G	G	G	G	G	G	G	G	G	G	G	G	A	G	G	G	G	G	A	G	G	A	G	G	G	A	A	G	G	G	A	G	G	A	G	G	G	G	G	G
S1D_25410371	G/A	1D	25410371	+	G	G	G	G	G	A	G	G	G	G	G	G	G	G	G	G	G	G	A	G	G	G	G	G	G	G	G	G	G	G	G	G	G	G	G	G	G	G	G	G	G	G	G	G	G
S1D_25496767	C/T	1D	25496767	+	C	C	C	C	C	T	C	C	T	T	C	C	T	T	T	T	C	T	T	C	T	T	C	C	C	T	T	C	C	C	T	T	C	C	C	T	C	C	T	C	C	C	T	C	C
S1D_25772466	G/A	1D	25772466	+	G	G	R	R	G	G	G	R	R	R	G	G	G	G	G	G	G	G	G	G	G	R	G	G	G	G	G	R	G	G	G	G	G	G	G	G	G	G	G	G	G	G	G	G	G
S1D_25772508	C/T	1D	25772508	+	Y	C	Y	Y	C	C	C	Y	Y	Y	C	C	C	C	C	C	C	C	C	C	C	Y	C	C	C	C	C	Y	C	C	C	C	C	C	C	C	C	C	C	C	C	C	C	C	C
S1D_26529367	T/A	1D	26529367	+	T	T	T	T	T	T	T	T	T	W	T	T	T	W	T	T	T	T	T	T	T	T	W	T	T	T	T	T	T	T	T	T	T	T	T	T	T	T	T	T	T	T	T	T	T
S1D_26529400	T/C	1D	26529400	+	T	T	T	T	T	T	T	T	T	T	T	T	T	T	T	T	T	C	T	T	T	T	T	T	T	T	Y	T	T	T	Y	Y	T	T	T	Y	T	T	Y	T	T	T	T	T	T
S1D_26583083	C/T	1D	26583083	+	C	C	C	C	C	C	C	C	C	C	C	C	C	C	C	C	C	Y	C	C	C	C	C	C	C	C	Y	C	C	C	Y	Y	C	C	C	Y	C	C	Y	C	C	C	C	C	C
S1D_26646975	A/T	1D	26646975	+	A	A	A	A	A	A	A	A	A	A	A	A	A	A	A	A	A	T	A	A	A	A	A	A	A	A	T	A	A	A	T	T	A	A	A	T	A	A	T	A	A	A	A	A	A
S1D_26754509	C/T	1D	26754509	+	C	C	C	C	C	C	C	C	C	C	C	C	C	C	C	C	C	T	C	Y	C	C	C	C	C	C	T	C	C	C	T	T	C	C	C	T	Y	C	T	C	C	C	Y	C	C
S1D_27143006	C/T	1D	27143006	+	C	C	C	C	C	C	C	C	C	C	C	C	C	C	C	C	C	T	C	C	C	C	C	C	C	C	T	C	C	C	Y	Y	C	C	C	T	C	C	T	C	C	C	C	C	C
S1D_27146774	C/A	1D	27146774	+	C	A	A	C	C	C	C	A	A	C	A	C	C	C	C	C	C	C	C	A	C	C	C	C	M	C	C	A	M	C	C	C	C	C	C	C	M	C	C	C	C	C	C	C	C
S1D_27251933	G/A	1D	27251933	+	G	A	R	G	G	G	G	R	A	G	G	G	G	G	G	G	G	G	G	A	G	G	G	G	R	G	G	A	R	G	G	G	G	G	G	G	A	G	G	G	G	G	G	G	A
S1D_27299509	C/G	1D	27299509	+	C	C	C	C	C	S	S	S	C	C	C	C	S	C	C	S	C	C	C	C	C	S	G	S	S	C	S	G	C	S	C	C	S	C	C	C	C	S	C	S	C	S	C	S	C
S1D_27364648	G/T	1D	27364648	+	G	G	G	G	G	G	G	G	G	G	G	G	G	G	G	G	G	T	G	G	G	G	G	G	G	G	T	G	G	K	T	T	G	G	G	T	G	G	T	G	G	G	G	G	G
S1D_27364654	G/A	1D	27364654	+	G	G	G	G	G	G	G	G	G	G	G	G	G	G	G	G	G	A	G	G	G	G	G	G	G	G	A	G	G	R	A	A	G	G	G	A	G	G	A	G	G	G	G	G	G
S1D_28063054	C/T	1D	28063054	+	C	C	Y	C	C	C	C	C	Y	C	Y	C	C	C	C	C	C	C	C	C	C	C	C	C	C	C	Y	C	Y	C	Y	C	C	C	C	C	Y	C	C	Y	C	Y	C	C	Y
S1D_28075102	C/T	1D	28075102	+	C	C	C	C	C	C	C	C	C	C	C	C	C	C	C	C	C	Y	Y	C	C	C	C	C	C	C	Y	C	C	C	Y	Y	C	C	C	Y	C	C	Y	Y	C	Y	C	C	C
S1D_28075104	T/C	1D	28075104	+	T	T	T	T	T	T	T	T	T	T	T	T	T	T	T	T	T	Y	Y	T	T	T	T	T	T	T	Y	T	T	T	Y	Y	T	T	T	Y	T	T	Y	Y	T	Y	T	T	T
S1D_28124107	C/A	1D	28124107	+	C	C	C	C	C	C	C	C	C	C	C	C	C	C	C	C	C	C	C	C	C	C	C	C	C	C	M	C	C	M	C	C	C	C	M	C	C	C	C	C	C	C	C	M	C
S1D_28124109	G/A	1D	28124109	+	G	G	G	G	G	R	G	G	G	G	G	G	G	G	R	G	G	G	G	G	G	G	G	R	R	G	R	G	G	R	R	G	G	G	G	G	R	G	R	G	G	G	G	G	G
S1D_28124115	A/G	1D	28124115	+	A	A	A	A	A	R	A	A	A	A	R	A	A	A	R	A	A	A	A	A	A	A	A	R	R	A	R	A	A	R	R	A	A	A	A	A	R	A	R	A	A	A	A	A	A
S1D_28158881	G/A	1D	28158881	+	G	G	G	G	G	G	G	G	G	R	G	G	G	G	G	G	G	G	G	G	G	G	G	G	G	G	G	G	G	G	G	G	G	G	G	G	G	G	G	G	G	G	A	G	G
S1D_28169291	G/C	1D	28169291	+	G	G	G	G	G	G	G	G	G	G	G	G	G	G	G	G	G	C	G	G	G	G	G	G	G	G	C	G	G	G	C	C	G	G	G	C	G	G	C	G	G	G	G	G	G
S1D_28370225	C/T	1D	28370225	+	C	C	C	C	C	C	C	Y	C	Y	C	C	C	C	C	C	C	C	C	C	C	C	C	C	C	C	C	C	C	Y	C	C	Y	C	C	Y	C	C	Y	C	C	C	Y	C	C
S1D_28933215	C/T	1D	28933215	+	C	C	C	Y	C	C	C	C	C	C	C	Y	C	C	C	C	C	C	C	C	C	C	Y	C	C	C	C	C	C	C	C	C	C	T	C	C	C	C	C	C	Y	C	C	C	C
S1D_28933258	C/T	1D	28933258	+	C	C	C	C	C	C	C	C	C	Y	C	Y	C	C	C	C	C	Y	C	C	C	C	Y	C	C	C	Y	C	C	C	Y	C	C	C	C	C	C	C	C	C	C	C	C	Y	Y
S1D_29317738	C/G	1D	29317738	+	C	C	C	C	C	S	C	C	C	C	C	S	C	C	C	C	C	C	C	C	C	C	S	C	C	C	C	C	C	C	C	C	C	C	C	C	C	C	C	C	C	C	C	C	C
S1D_30021695	C/T	1D	30021695	+	C	C	C	C	C	C	C	C	C	C	C	C	C	C	C	C	C	T	C	C	C	C	C	C	C	C	T	C	C	C	T	T	C	C	C	T	C	C	T	C	C	C	C	C	C
S1D_30021714	A/G	1D	30021714	+	A	A	A	A	A	A	A	A	A	A	A	A	A	A	A	A	A	G	A	A	A	A	A	A	A	A	G	A	A	A	G	G	A	A	A	G	A	A	G	A	A	A	A	A	A
S1D_30307802	G/T	1D	30307802	+	G	G	G	G	G	G	G	G	G	G	G	G	G	G	G	G	G	K	G	G	G	G	G	G	G	G	K	G	G	G	G	K	G	G	G	G	G	G	G	G	G	G	G	G	G
S1D_30307823	A/G	1D	30307823	+	A	A	A	A	A	A	A	A	A	A	A	A	A	A	A	A	A	R	A	A	A	A	A	A	A	A	R	A	A	A	A	R	A	A	A	A	A	A	A	A	A	A	A	A	A
S1D_30338543	G/C	1D	30338543	+	G	G	G	G	G	G	G	G	G	G	G	G	C	C	G	G	G	G	C	G	C	G	G	G	G	G	G	G	G	G	G	G	C	G	C	G	G	C	G	G	G	G	G	G	G
S1D_30465531	T/C	1D	30465531	+	T	T	T	Y	Y	T	T	T	T	T	T	T	T	T	T	T	Y	T	T	T	T	T	T	T	T	T	C	T	T	T	C	Y	T	Y	T	Y	T	T	Y	T	C	T	T	T	T
S1D_30465550	G/A	1D	30465550	+	G	G	G	R	R	G	G	G	G	G	G	G	G	G	G	G	R	G	G	G	G	G	G	G	G	G	A	G	G	G	A	R	G	R	G	R	G	G	R	G	A	G	G	G	G
S1D_30679558	C/G	1D	30679558	+	C	C	C	C	C	C	C	C	C	C	C	C	C	C	C	C	C	C	C	C	C	C	C	C	C	C	G	C	C	C	G	G	C	C	C	G	C	C	G	C	C	C	C	C	C
S1D_30679584	G/A	1D	30679584	+	G	G	G	G	G	G	G	G	G	G	G	G	G	G	G	G	G	G	G	G	G	G	G	G	G	G	A	G	G	G	A	A	G	G	G	A	G	G	A	G	G	G	G	G	G
S1D_30679586	C/T	1D	30679586	+	C	C	C	C	C	C	C	C	C	C	C	C	C	C	C	C	C	C	C	C	C	C	C	C	C	C	T	C	C	C	T	T	C	C	C	T	C	C	T	C	C	C	C	C	C
S1D_30748065	A/C	1D	30748065	+	A	C	C	A	A	A	A	C	C	C	C	C	A	C	A	A	A	A	C	A	A	A	C	A	C	A	A	C	C	A	A	A	A	A	A	A	A	A	A	A	A	A	A	A	C
S1D_31773011	G/T	1D	31773011	+	G	G	G	G	G	G	T	G	G	G	G	G	G	G	G	G	G	G	G	G	G	G	G	T	G	G	G	G	G	G	K	G	G	G	G	G	G	G	G	G	G	G	G	G	G
S1D_32106766	G/C	1D	32106766	+	S	G	G	G	G	G	G	G	G	G	G	G	G	G	S	G	S	S	G	S	S	G	G	G	G	G	G	G	G	G	G	S	G	G	G	G	G	G	G	G	S	G	G	G	G
S1D_32106788	A/G	1D	32106788	+	A	A	A	A	A	A	A	A	A	A	A	A	A	A	A	A	A	A	A	A	A	A	A	A	A	A	G	A	A	A	A	G	A	A	A	G	A	A	G	A	A	A	A	A	A
S1D_32306933	C/G	1D	32306933	+	C	C	C	C	C	C	C	C	C	C	C	C	C	C	C	C	C	C	C	C	C	C	C	C	C	C	G	C	C	C	C	G	C	C	C	G	C	C	G	C	C	C	C	C	C
S1D_32418337	G/T	1D	32418337	+	G	G	G	G	G	G	K	G	G	G	G	G	G	G	G	G	G	G	G	G	G	G	G	K	G	G	G	G	G	G	K	G	G	G	G	G	G	G	G	G	G	G	G	G	G
S1D_32851109	C/T	1D	32851109	+	C	C	C	C	C	C	T	C	C	C	C	C	C	C	C	C	C	C	C	C	C	C	C	T	C	C	C	C	C	C	T	C	C	C	C	C	C	C	C	C	C	C	C	C	C
S1D_32882942	G/A	1D	32882942	+	G	G	G	G	G	R	R	G	G	G	G	G	G	G	G	G	G	G	A	G	G	G	G	R	G	G	G	G	G	G	G	A	R	G	G	R	G	R	A	G	G	G	G	G	G
S1D_33027912	G/A	1D	33027912	+	R	G	G	R	G	A	G	G	G	G	G	R	G	G	G	G	G	G	G	G	R	G	G	G	G	G	G	G	G	G	G	R	G	G	G	G	G	G	G	G	G	G	G	G	G
S1D_33027924	T/C	1D	33027924	+	Y	T	T	Y	T	C	T	T	T	T	T	Y	T	T	T	T	T	T	T	T	Y	T	T	T	T	T	T	T	T	T	T	Y	T	T	T	T	T	T	T	T	T	T	T	T	T
S1D_34128659	A/T	1D	34128659	+	T	A	A	T	T	T	T	A	A	A	A	A	T	A	T	T	T	A	A	A	A	T	A	T	A	T	A	A	A	T	A	A	A	T	A	A	A	A	A	T	T	T	A	T	A
S1D_34643876	C/A	1D	34643876	+	C	C	C	C	C	C	C	C	C	C	C	C	C	C	C	C	C	A	C	C	C	C	C	C	C	C	A	C	C	C	A	A	C	C	C	A	C	C	A	C	C	C	C	C	C
S1D_35150497	C/T	1D	35150497	+	C	C	C	C	C	C	C	C	C	Y	C	Y	C	C	C	C	C	C	C	Y	C	C	C	C	C	C	C	C	C	C	C	C	C	C	Y	Y	C	C	C	C	C	C	Y	C	C
S1D_35150513	C/T	1D	35150513	+	C	C	C	C	Y	C	C	C	Y	C	C	Y	Y	C	C	C	C	C	C	Y	Y	C	C	C	C	C	C	Y	C	C	C	C	C	C	C	Y	C	C	C	C	C	Y	C	C	Y
S1D_35284408	T/C	1D	35284408	+	T	T	T	T	T	T	T	T	T	T	T	T	T	T	T	T	T	C	T	T	T	T	T	T	T	T	C	T	T	T	C	C	T	T	T	C	T	T	C	T	T	T	T	T	T
S1D_35448133	C/T	1D	35448133	+	C	Y	Y	C	C	C	C	C	Y	C	C	C	C	C	C	C	C	C	C	C	C	C	C	C	C	C	C	C	C	C	C	Y	C	Y	C	C	C	C	C	C	C	C	C	C	C
S1D_35448144	C/G	1D	35448144	+	C	S	C	C	C	C	C	S	C	C	C	S	C	C	C	C	C	C	C	C	S	C	C	C	C	C	S	C	C	C	C	C	C	C	C	C	C	C	C	C	C	C	S	C	C
S1D_35448151	G/C	1D	35448151	+	G	G	G	G	G	G	G	G	G	G	S	G	G	G	G	G	G	G	G	G	G	G	G	S	G	G	G	G	G	G	G	G	G	G	S	G	G	G	G	G	G	G	G	G	G
S1D_35448169	G/C	1D	35448169	+	G	G	S	G	G	G	G	G	S	G	G	G	G	G	G	G	G	G	G	G	G	G	G	G	G	G	G	G	G	G	G	G	G	S	G	G	G	G	G	G	G	G	G	G	G
S1D_35448170	C/T	1D	35448170	+	C	C	Y	T	Y	C	C	C	C	C	C	C	C	C	C	C	C	C	C	C	C	C	C	C	C	C	C	C	C	C	C	C	C	C	C	C	C	C	C	C	C	C	C	C	C
S1D_35522812	T/C	1D	35522812	+	T	T	T	T	T	T	T	T	T	T	Y	T	T	T	T	T	T	T	T	T	T	T	T	T	T	T	T	T	T	Y	T	T	T	T	C	T	T	Y	T	T	T	T	T	T	T
S1D_35620022	C/A	1D	35620022	+	C	C	C	C	C	A	C	C	C	C	C	C	C	C	C	C	C	C	C	C	C	C	C	C	C	C	C	C	C	C	C	C	C	C	C	C	C	C	C	C	C	C	C	C	C
S1D_35705321	T/C	1D	35705321	+	T	Y	T	T	T	T	T	T	T	Y	T	T	T	T	T	T	T	T	T	T	T	T	T	T	T	T	T	T	T	T	T	T	T	T	T	Y	T	T	T	T	T	T	T	T	T
S1D_36826515	A/G	1D	36826515	+	A	A	A	A	A	A	A	A	A	A	A	A	A	A	A	A	A	G	A	A	A	A	A	A	A	A	G	A	A	A	G	G	A	A	A	G	A	A	G	A	A	A	A	A	A
S1D_37710634	C/G	1D	37710634	+	C	S	C	C	C	S	C	C	C	C	C	C	C	C	C	C	C	C	C	C	C	S	C	C	C	C	C	C	C	C	S	S	C	C	C	C	G	C	S	C	C	C	S	C	S
S1D_37910622	G/A	1D	37910622	+	G	G	G	G	G	A	G	G	G	G	G	G	G	G	A	A	G	A	G	G	G	A	G	G	G	A	A	G	G	G	A	A	G	G	G	A	G	G	A	G	G	G	G	G	G
S1D_37954833	T/A	1D	37954833	+	T	T	T	T	T	T	T	A	W	W	T	T	T	W	T	T	T	T	T	T	T	T	T	T	T	T	T	W	T	T	T	T	W	T	W	T	T	T	T	T	T	T	T	W	T
S1D_37954857	T/C	1D	37954857	+	T	T	T	T	T	T	T	C	T	Y	T	T	T	Y	T	T	T	T	T	T	T	T	T	T	T	T	T	Y	T	T	T	T	Y	T	Y	T	T	T	T	T	T	T	T	Y	T
S1D_38256913	G/A	1D	38256913	+	G	G	G	G	G	G	G	G	G	G	G	G	G	G	G	G	R	G	G	G	G	G	G	G	G	G	G	G	G	G	R	G	G	G	G	R	G	G	G	G	G	R	R	G	G
S1D_38256923	G/A	1D	38256923	+	G	G	G	G	G	G	G	G	G	G	G	G	G	G	G	G	R	G	G	G	G	G	G	G	G	G	G	G	G	G	R	G	G	G	G	R	G	G	G	G	G	R	R	G	G
S1D_38256933	T/C	1D	38256933	+	T	T	T	T	T	T	T	T	T	T	T	T	T	T	T	T	Y	T	T	T	T	T	T	T	T	T	T	T	T	T	Y	T	T	T	T	Y	T	T	T	T	T	Y	Y	T	T
S1D_38256986	T/C	1D	38256986	+	T	T	T	C	T	Y	T	T	T	T	T	T	T	T	Y	T	T	Y	T	T	T	Y	T	T	T	Y	T	T	T	T	T	Y	T	T	T	Y	T	T	Y	T	T	T	T	T	T
S1D_38256992	T/C	1D	38256992	+	T	T	T	T	T	Y	T	T	T	T	T	T	T	T	Y	T	T	Y	T	T	T	Y	T	T	T	Y	T	T	T	T	T	Y	T	T	T	Y	T	T	Y	T	T	T	T	T	T
S1D_38257003	G/A	1D	38257003	+	G	G	G	G	G	R	G	G	G	G	G	G	G	G	R	G	G	R	G	G	G	R	G	G	G	R	G	G	G	G	G	R	G	G	G	R	G	G	R	G	G	G	G	G	G
S1D_38444496	C/T	1D	38444496	+	C	C	C	C	C	C	C	C	C	C	C	C	C	C	C	C	Y	C	C	C	C	C	C	C	C	C	Y	C	C	C	C	Y	C	C	Y	C	Y	C	C	C	C	C	C	C	C
S1D_38444517	G/A	1D	38444517	+	G	G	G	G	G	G	G	G	G	G	G	G	G	G	G	G	R	G	G	G	G	G	G	G	G	G	R	G	G	G	G	R	G	G	R	G	R	G	G	G	G	G	G	G	G
S1D_39723218	C/T	1D	39723218	+	C	C	C	C	C	T	C	C	C	C	C	C	C	C	Y	Y	C	C	C	C	C	Y	C	C	C	T	C	C	C	C	C	C	C	C	C	C	C	C	C	C	C	C	C	C	C
S1D_39882397	G/C	1D	39882397	+	G	G	G	G	G	S	G	G	G	G	G	G	G	G	S	S	G	G	G	G	G	S	G	G	G	S	G	G	G	G	G	G	G	G	G	G	G	G	G	G	G	G	G	G	G
S1D_39882406	G/A	1D	39882406	+	G	G	G	G	G	R	G	G	G	G	G	G	G	G	R	R	G	G	G	G	G	R	G	G	G	R	G	G	G	G	G	G	G	G	G	G	G	G	G	G	G	G	G	G	G
S1D_39894000	T/C	1D	39894000	+	Y	T	T	T	T	T	Y	T	T	T	Y	T	T	Y	Y	T	T	T	Y	T	T	T	T	T	T	Y	T	T	T	T	T	T	T	T	T	Y	T	T	T	T	T	T	T	T	T
S1D_39894001	G/A	1D	39894001	+	R	G	G	R	G	G	R	G	G	G	R	G	G	R	G	G	G	G	R	R	G	G	G	G	G	R	G	G	G	G	G	G	G	G	G	R	G	G	R	G	G	G	G	G	G
S1D_39894003	C/T	1D	39894003	+	C	C	C	C	C	C	C	C	C	C	Y	C	C	C	C	C	C	C	Y	C	C	Y	C	C	C	C	C	C	C	C	C	C	Y	C	Y	Y	C	C	C	Y	C	C	C	C	C
S1D_39894018	G/A	1D	39894018	+	R	G	G	G	G	G	G	G	G	G	G	G	G	R	G	G	R	G	R	G	G	G	G	G	G	R	G	G	G	G	G	G	G	G	G	G	G	G	G	G	G	G	R	G	G
S1D_39929021	G/A	1D	39929021	+	G	G	G	G	G	G	A	G	G	G	R	G	G	G	G	G	G	G	R	G	G	G	G	G	G	G	G	R	G	G	G	G	A	G	G	R	G	G	R	G	G	G	G	G	R
S1D_39929028	G/T	1D	39929028	+	G	G	G	G	K	G	G	G	G	G	G	G	G	G	G	G	G	G	K	G	K	G	K	G	G	G	G	G	G	G	G	G	G	G	G	G	G	K	G	G	G	T	K	K	G
S1D_39929036	T/A	1D	39929036	+	T	T	T	T	T	T	T	T	T	T	T	W	T	T	A	T	T	T	T	T	T	T	T	T	T	T	T	W	T	T	T	T	T	A	W	W	A	T	T	T	T	T	W	T	T
S1D_39929037	C/A	1D	39929037	+	C	C	C	C	C	C	C	C	C	C	C	M	C	C	A	C	C	C	C	C	C	C	C	C	C	C	C	M	C	C	C	C	C	A	M	M	A	C	C	C	C	C	M	C	C
S1D_39929043	T/C	1D	39929043	+	T	T	Y	C	T	C	T	C	T	T	T	T	T	T	T	T	T	T	T	T	Y	C	T	T	T	T	T	T	T	C	T	T	T	T	Y	T	T	Y	T	C	T	T	T	T	T
S1D_40243704	G/A	1D	40243704	+	G	G	G	G	G	G	G	R	G	G	R	G	R	G	G	G	G	G	G	G	G	G	G	G	G	G	R	G	G	R	G	G	G	G	R	R	G	G	G	G	G	G	G	G	G
S1D_40243714	G/A	1D	40243714	+	G	G	G	G	G	G	G	G	G	G	G	G	G	G	G	G	G	R	G	G	G	R	G	G	A	G	G	G	G	G	R	G	G	G	G	G	G	G	G	G	G	G	G	G	R
S1D_40243731	C/T	1D	40243731	+	C	C	C	C	C	C	C	Y	C	C	Y	C	Y	C	C	C	C	C	C	C	C	C	C	C	C	C	Y	C	C	Y	C	C	C	C	Y	Y	C	C	C	C	C	C	C	C	C
S1D_40272032	A/C	1D	40272032	+	A	A	A	A	A	C	A	A	A	A	A	A	A	A	C	C	A	A	A	A	A	C	A	A	A	C	A	A	A	A	A	A	A	A	A	A	A	A	A	A	A	A	A	A	A
S1D_40272063	T/C	1D	40272063	+	C	T	T	C	C	T	C	T	C	C	T	T	C	T	T	T	C	T	C	T	T	T	T	C	T	T	T	T	T	C	T	T	C	C	C	T	T	C	T	C	C	C	C	C	T
S1D_40272108	T/C	1D	40272108	+	T	T	T	T	T	T	T	T	T	T	T	T	T	T	T	T	T	C	T	T	T	T	T	T	T	T	C	T	T	T	T	C	T	T	T	C	T	T	C	T	T	T	T	T	T
S1D_41392454	G/A	1D	41392454	+	A	G	G	G	R	G	G	G	G	A	G	G	G	G	G	G	G	G	R	G	G	G	R	R	R	G	G	G	G	G	G	G	R	G	G	R	G	G	G	G	G	A	R	R	G
S1D_42152662	T/C	1D	42152662	+	C	C	T	T	C	C	T	T	T	C	T	T	T	T	T	T	T	T	T	T	T	C	C	C	C	T	T	T	T	T	C	C	T	C	T	T	C	T	C	T	C	T	C	T	C
S1D_42274546	C/T	1D	42274546	+	C	C	C	C	C	T	C	C	C	Y	C	C	C	C	C	C	C	C	C	C	C	C	T	Y	Y	C	C	C	C	C	C	C	C	C	C	C	C	C	C	C	C	C	C	C	C
S1D_42274571	G/C	1D	42274571	+	G	G	G	G	G	C	G	G	G	G	G	G	G	G	G	G	G	G	G	G	G	G	G	G	G	G	G	G	G	G	G	G	G	G	G	G	G	G	G	G	G	G	G	G	G
S1D_42452144	C/A	1D	42452144	+	C	C	C	C	M	C	M	C	C	C	C	C	M	C	C	C	C	M	C	C	C	C	C	C	C	M	C	C	M	C	C	C	C	C	C	A	C	C	C	C	C	C	C	C	C
S1D_42850366	C/G	1D	42850366	+	C	G	C	C	S	G	C	C	C	C	C	C	C	C	C	S	S	C	C	C	C	G	C	C	C	C	C	C	C	C	G	S	C	G	C	C	S	C	G	C	S	C	C	C	S
S1D_42850393	C/A	1D	42850393	+	C	A	C	C	M	A	C	C	C	C	C	C	C	C	C	M	C	C	C	C	C	A	C	C	C	C	C	C	C	C	A	M	C	A	C	C	M	C	A	C	M	C	C	C	M
S1D_42850394	C/T	1D	42850394	+	C	T	C	C	Y	T	C	C	C	C	C	C	C	C	C	Y	Y	C	C	C	C	T	C	C	C	C	C	C	C	C	T	Y	C	T	C	C	Y	C	T	C	Y	C	C	C	Y
S1D_42850408	G/A	1D	42850408	+	G	A	G	G	R	A	G	G	G	G	G	G	G	G	G	R	G	G	G	G	G	A	G	G	G	G	G	G	G	G	A	R	G	A	G	G	R	G	A	G	R	G	G	G	R
S1D_43653196	A/G	1D	43653196	+	A	A	A	A	A	A	A	A	A	A	A	A	A	A	A	A	A	G	A	A	A	A	A	A	A	A	A	A	A	A	A	A	A	A	A	G	A	A	G	A	A	A	A	A	A
S1D_43653219	G/C	1D	43653219	+	G	G	G	G	G	C	G	G	G	G	G	G	G	G	G	G	G	C	G	C	G	G	G	G	G	C	C	G	G	G	C	C	G	G	G	C	C	G	C	G	G	G	G	G	G
S1D_43731719	G/A	1D	43731719	+	G	G	G	G	G	G	G	G	G	G	G	G	G	G	G	G	G	R	G	G	G	G	G	G	G	G	R	G	G	G	R	R	G	G	G	R	G	G	R	G	G	G	G	G	G
S1D_43732342	G/A	1D	43732342	+	G	G	G	G	G	G	G	G	G	G	G	G	G	G	G	G	G	R	G	G	G	G	G	G	G	G	R	G	G	G	R	R	G	G	G	G	G	G	R	G	G	G	G	G	G
S1D_43770235	C/G	1D	43770235	+	C	C	C	C	C	C	C	C	C	C	C	C	C	C	C	C	C	S	C	C	C	C	C	C	C	C	S	C	C	C	C	S	C	C	C	C	C	C	S	C	C	C	C	C	C
S1D_43866611	T/C	1D	43866611	+	T	C	C	T	T	T	T	C	T	T	C	T	T	T	T	T	T	T	T	T	T	T	T	T	C	T	T	C	C	T	T	T	T	T	T	T	T	T	T	T	T	T	T	T	C
S1D_43972355	C/A	1D	43972355	+	C	C	M	C	C	C	C	C	C	C	C	C	C	C	C	M	C	C	C	C	C	C	C	M	M	C	C	C	C	C	C	C	M	M	C	C	C	C	M	C	M	C	C	C	C
S1D_43972373	G/A	1D	43972373	+	A	G	R	G	G	R	G	R	G	G	G	G	G	G	R	R	G	G	G	G	G	R	G	R	G	G	G	G	G	G	G	R	G	G	G	G	G	G	G	R	G	G	G	G	G
S1D_43972388	G/A	1D	43972388	+	A	G	R	G	G	R	G	R	G	G	G	G	G	G	R	R	G	G	G	G	G	R	G	R	G	G	G	G	G	G	G	R	G	G	G	G	G	G	G	R	G	G	G	G	G
S1D_43972399	G/A	1D	43972399	+	G	G	G	G	G	R	G	G	G	G	G	R	A	G	R	G	G	G	G	G	G	R	G	R	R	R	R	G	G	G	G	G	G	G	G	G	G	G	G	G	G	G	G	G	G
S1D_43972407	C/A	1D	43972407	+	A	C	M	C	C	M	C	M	C	C	C	C	C	C	M	M	C	C	C	C	C	M	C	M	C	C	C	C	C	C	C	M	C	C	C	C	C	C	C	M	C	C	C	C	C
S1D_43972412	G/A	1D	43972412	+	G	G	G	G	G	G	R	R	G	R	G	G	G	A	G	G	G	G	A	G	G	G	G	G	G	G	G	R	G	G	R	G	R	G	R	R	G	R	R	G	G	G	G	A	G
S1D_44000801	T/G	1D	44000801	+	T	T	T	T	T	T	T	T	T	G	T	T	T	T	T	T	T	T	T	T	T	T	G	G	G	T	T	T	T	T	T	T	T	T	T	T	T	T	T	T	T	T	G	T	T
S1D_44042549	G/C	1D	44042549	+	G	G	G	G	G	G	G	G	G	G	G	G	G	G	G	G	G	C	G	G	G	G	G	G	G	G	C	G	G	G	C	C	G	G	G	C	G	G	C	G	G	G	G	G	G
S1D_44344329	G/C	1D	44344329	+	G	G	G	G	G	G	G	G	G	G	G	G	G	G	G	G	G	C	G	G	G	G	G	G	G	G	C	G	G	G	C	C	G	G	G	C	G	G	C	G	G	G	G	G	G
S1D_44511672	T/C	1D	44511672	+	T	T	T	T	T	T	T	T	T	T	T	T	T	T	T	T	T	C	T	T	T	T	T	T	T	T	C	T	T	T	C	C	T	T	T	T	T	T	T	T	T	T	T	T	T
S1D_44511710	T/G	1D	44511710	+	T	T	T	T	T	T	T	T	T	T	T	T	T	T	T	T	T	G	T	T	T	T	T	T	T	T	G	T	T	T	G	G	T	T	T	T	T	T	T	T	T	T	T	T	T
S1D_44511724	G/C	1D	44511724	+	C	G	G	G	G	G	G	G	G	G	G	C	G	G	G	G	G	G	G	G	G	G	C	G	G	G	G	G	G	C	G	G	G	G	G	G	G	G	G	C	G	C	G	C	G
S1D_44511725	A/C	1D	44511725	+	C	A	A	A	A	A	A	A	A	A	A	C	A	A	A	A	A	A	A	A	A	A	C	A	A	A	A	A	A	C	A	A	A	A	A	A	A	A	A	C	A	C	A	C	A
S1D_44511726	G/T	1D	44511726	+	T	G	G	G	G	G	G	G	G	G	G	T	G	G	G	G	G	G	G	G	G	G	T	G	G	G	G	G	G	T	G	G	G	G	G	G	G	G	G	T	G	T	G	T	G
S1D_44511728	C/T	1D	44511728	+	T	C	C	C	C	C	C	C	C	C	C	T	C	C	C	C	C	C	C	C	C	C	T	C	C	C	C	C	C	T	C	C	C	C	C	C	C	C	C	T	C	T	C	T	C
S1D_45497708	T/A	1D	45497708	+	T	T	T	T	T	T	T	T	T	T	T	T	T	T	T	T	T	T	T	T	T	T	T	T	T	T	T	T	T	W	T	T	T	T	W	T	T	T	T	T	T	T	T	T	T
S1D_45497746	G/A	1D	45497746	+	G	G	G	G	G	G	G	G	G	G	G	G	G	G	G	G	G	G	G	G	G	G	G	G	G	G	G	G	G	R	G	G	G	G	R	G	G	G	G	G	G	G	G	G	G
S1D_45499469	T/C	1D	45499469	+	T	T	Y	T	T	T	T	T	Y	T	T	T	Y	T	T	T	T	T	T	T	T	T	T	T	T	T	T	T	T	T	T	T	Y	T	T	T	T	T	T	T	T	Y	T	T	T
S1D_45499479	T/C	1D	45499479	+	T	T	T	Y	T	T	T	T	T	T	T	T	Y	T	T	T	T	T	T	T	T	T	T	Y	T	T	T	T	T	T	T	T	T	T	T	T	T	T	Y	T	T	T	T	T	T
S1D_45625231	A/G	1D	45625231	+	A	R	A	A	A	A	A	A	A	A	A	A	A	R	A	A	A	R	A	A	R	A	A	A	A	A	A	A	A	A	R	A	A	A	A	A	A	A	R	A	A	A	A	A	A
S1D_45625243	C/A	1D	45625243	+	C	M	C	C	C	C	C	C	C	C	C	C	C	M	C	C	C	M	C	C	M	C	C	C	C	C	C	C	C	C	M	C	C	C	C	C	C	C	M	C	C	C	C	C	C
S1D_46332489	A/C	1D	46332489	+	A	A	A	A	A	A	A	A	M	A	A	M	A	A	A	A	A	A	A	A	A	A	A	A	A	A	A	A	A	A	A	A	A	A	A	M	M	A	A	A	M	A	A	A	M
S1D_46416771	C/T	1D	46416771	+	C	Y	C	C	C	C	C	C	C	C	C	C	C	Y	C	C	C	Y	C	C	C	C	C	C	C	C	C	C	C	C	Y	C	C	C	C	Y	C	C	C	C	C	C	C	C	C
S1D_46422950	C/A	1D	46422950	+	C	C	C	C	C	C	C	C	C	C	C	C	M	C	C	C	C	C	C	M	M	C	C	C	C	C	M	C	C	C	C	C	C	C	C	C	C	C	C	A	C	C	C	C	C
S1D_46422976	A/C	1D	46422976	+	A	A	A	A	A	A	A	A	A	A	A	A	M	A	A	A	A	A	A	M	M	A	A	A	A	A	M	A	A	A	A	A	A	A	A	A	A	A	A	C	A	A	A	A	A
S1D_46422981	G/A	1D	46422981	+	G	G	G	G	G	G	G	G	G	G	G	G	R	G	G	G	G	G	G	R	R	G	G	G	G	G	R	G	G	G	G	G	G	G	G	G	G	G	G	A	G	G	G	G	G
S1D_46529043	G/A	1D	46529043	+	G	R	R	R	G	G	G	R	G	R	G	G	G	R	G	G	G	G	A	G	G	G	G	G	G	G	R	G	G	G	G	R	G	R	G	R	G	A	G	A	G	G	R	G	G
S1D_46577885	A/G	1D	46577885	+	R	A	A	A	A	A	A	A	A	A	A	R	A	A	A	R	A	R	A	A	R	G	R	A	A	A	R	A	A	A	A	R	A	G	A	A	A	A	R	A	A	A	A	G	A
S1D_46577900	T/C	1D	46577900	+	T	T	C	T	T	T	T	Y	T	C	T	T	T	Y	T	T	T	T	T	T	T	T	T	T	T	T	Y	Y	T	T	T	Y	Y	T	T	Y	T	T	T	Y	T	T	T	T	Y
S1D_46577902	T/C	1D	46577902	+	T	T	T	T	Y	T	T	T	T	T	T	T	T	T	T	T	T	Y	T	T	T	T	T	T	T	T	Y	T	T	T	T	Y	T	T	T	Y	T	T	Y	T	T	T	T	T	Y
S1D_46577905	G/A	1D	46577905	+	G	G	G	G	G	R	R	G	G	G	G	R	G	G	G	G	G	G	G	G	G	G	G	G	G	G	G	G	R	G	G	G	G	G	G	R	G	G	G	G	R	G	R	G	G
S1D_46813875	G/C	1D	46813875	+	G	G	G	G	S	G	G	G	S	G	G	G	G	S	G	G	G	S	G	G	G	G	G	G	G	G	G	G	G	G	G	S	G	G	G	G	G	S	G	G	G	S	G	G	G
S1D_46813901	A/G	1D	46813901	+	A	R	A	A	R	A	A	A	A	A	G	A	A	A	A	A	A	A	A	R	A	R	A	A	A	A	A	A	A	A	A	A	A	R	A	A	A	A	R	R	A	R	R	A	A
S1D_46813926	C/A	1D	46813926	+	M	C	C	C	C	M	C	C	C	C	C	C	C	M	C	C	C	C	C	C	M	C	M	C	C	C	C	C	C	C	C	C	C	C	C	C	C	C	C	C	C	C	C	C	A
S1D_46904713	A/G	1D	46904713	+	R	A	A	R	A	A	A	A	R	G	A	A	A	A	A	A	R	G	A	A	A	A	A	A	A	A	G	A	A	A	G	A	R	A	A	G	A	A	G	R	R	A	A	A	A
S1D_46904747	G/C	1D	46904747	+	G	G	G	S	G	G	G	G	S	C	G	G	G	G	G	G	S	C	G	G	G	G	G	G	G	G	C	G	G	G	C	G	S	G	S	C	G	G	G	S	S	G	G	G	S
S1D_46904749	G/A	1D	46904749	+	G	G	G	R	G	G	G	G	R	A	G	G	G	G	G	G	R	A	G	G	G	G	G	G	G	G	A	G	G	G	A	G	R	G	R	A	G	G	G	R	R	G	G	G	R
S1D_47794746	G/C	1D	47794746	+	G	S	G	G	G	G	G	G	G	G	G	G	G	G	G	G	G	S	G	G	G	G	G	G	G	G	S	G	G	G	S	S	G	G	G	G	G	G	S	G	G	G	G	G	G
S1D_48308991	G/A	1D	48308991	+	G	G	G	G	G	G	G	G	G	R	G	G	G	G	G	G	G	G	G	G	G	G	G	G	G	G	G	G	G	G	G	G	G	R	G	G	R	G	G	G	G	G	G	G	R
S1D_48308995	A/C	1D	48308995	+	C	A	A	M	A	A	A	M	A	A	A	A	A	A	A	A	A	A	A	A	A	M	M	M	A	A	A	A	A	A	A	A	C	A	A	A	A	A	A	A	A	M	A	A	A
S1D_48791772	A/G	1D	48791772	+	A	A	A	G	R	A	A	A	A	A	A	A	A	A	A	A	G	A	A	A	A	A	A	R	A	A	A	A	A	A	A	A	A	R	A	A	A	A	A	A	G	A	A	A	A
S1D_48804567	G/A	1D	48804567	+	G	G	G	G	G	G	G	G	G	G	G	G	G	G	G	G	G	R	G	G	G	G	G	G	G	G	G	G	G	G	G	G	G	G	G	G	G	G	G	G	R	G	G	G	G
S1D_49038643	C/T	1D	49038643	+	C	C	C	C	C	C	C	C	C	C	C	C	C	C	C	C	C	T	C	C	C	C	C	C	C	C	T	C	C	C	T	T	C	C	C	T	C	C	T	C	C	C	C	C	C
S1D_49039060	C/T	1D	49039060	+	C	C	C	C	C	C	C	C	C	C	C	C	C	C	C	C	C	T	C	C	C	C	C	C	C	C	T	C	C	C	T	T	C	C	C	T	C	C	T	C	C	C	C	C	C
S1D_49182051	T/G	1D	49182051	+	G	T	T	T	T	T	T	T	T	T	T	G	T	T	T	T	T	T	G	T	T	T	G	T	T	T	T	T	T	G	T	T	T	T	T	T	T	T	T	G	T	G	T	G	T
S1D_50485470	A/G	1D	50485470	+	A	G	A	A	A	A	A	R	A	A	A	A	A	A	A	A	A	R	A	R	A	A	A	A	A	A	A	A	R	R	A	R	A	A	A	A	R	R	A	A	A	A	A	A	A
S1D_50485480	G/A	1D	50485480	+	G	A	G	G	G	G	G	R	G	G	G	G	G	G	G	G	G	R	G	R	G	G	G	G	G	G	G	G	R	R	G	R	G	G	G	G	R	R	G	G	G	G	G	G	G
S1D_50839085	A/G	1D	50839085	+	A	A	A	A	A	A	A	A	A	A	A	A	A	A	A	A	A	G	A	A	A	A	A	A	A	A	G	A	A	A	G	G	A	A	A	G	A	A	G	A	A	A	A	A	A
S1D_50840859	A/G	1D	50840859	+	A	A	A	A	A	G	A	A	A	A	A	A	A	A	G	G	A	A	A	A	A	G	A	A	A	G	A	A	A	A	A	A	A	A	A	A	A	A	A	A	A	A	A	A	A
S1D_50906919	T/A	1D	50906919	+	T	T	T	T	T	W	T	W	T	T	T	T	T	T	T	T	T	T	T	T	T	T	T	T	T	T	T	T	T	T	T	T	T	W	T	T	T	T	T	T	T	T	T	T	T
S1D_50906937	G/A	1D	50906937	+	G	G	G	G	G	G	G	G	G	G	G	G	G	R	G	G	G	R	G	G	G	G	G	G	G	G	G	G	G	G	G	G	G	G	G	R	G	G	R	G	G	G	G	G	G
S1D_50906945	T/C	1D	50906945	+	T	T	T	T	T	Y	T	Y	T	T	T	T	T	T	T	T	T	T	T	T	T	T	T	T	T	T	T	T	T	T	T	T	T	Y	T	T	T	T	T	T	T	T	T	T	T
S1D_50906961	A/C	1D	50906961	+	A	A	A	A	A	A	A	A	A	A	A	A	A	M	A	A	A	M	A	A	A	A	A	A	A	A	A	A	A	A	A	A	A	A	A	M	A	A	M	A	A	A	A	A	A
S1D_50906962	G/A	1D	50906962	+	G	G	G	G	G	G	G	G	G	G	G	G	G	R	G	G	G	R	G	G	G	G	G	G	G	G	G	G	G	G	G	G	G	G	G	R	G	G	R	G	G	G	G	G	G
S1D_50906965	C/A	1D	50906965	+	C	C	C	C	C	M	C	M	C	C	C	C	C	C	C	C	C	C	C	C	C	C	C	C	C	C	C	C	C	C	C	C	C	M	C	C	C	C	C	C	C	C	C	C	C
S1D_51369473	C/G	1D	51369473	+	C	C	C	C	C	C	C	C	C	C	C	C	C	C	C	C	C	G	C	C	C	C	C	C	C	C	S	C	C	C	S	S	C	C	C	G	C	C	S	C	C	C	C	C	C
S1D_51369480	G/A	1D	51369480	+	G	G	G	G	G	G	G	G	G	G	G	G	G	G	G	G	G	G	G	R	G	G	G	G	G	R	G	R	G	R	G	G	R	G	G	G	G	G	R	G	G	G	R	G	G
S1D_51369484	G/A	1D	51369484	+	G	G	R	G	G	R	G	G	G	G	G	G	G	G	G	G	G	G	G	G	G	A	G	G	G	R	G	G	G	R	G	G	R	R	G	G	G	G	G	G	R	G	G	G	R
S1D_51923442	C/A	1D	51923442	+	C	C	C	C	C	C	C	C	C	C	C	C	C	C	C	C	C	C	C	C	C	C	M	C	M	C	C	C	C	C	C	M	C	C	C	C	C	C	C	C	C	C	C	C	C
S1D_51933960	C/T	1D	51933960	+	C	C	C	C	C	C	C	C	C	C	C	C	C	T	C	C	C	Y	C	C	C	C	C	C	C	C	C	C	C	C	C	Y	C	C	C	Y	C	C	C	C	C	C	C	C	C
S1D_51936981	T/C	1D	51936981	+	T	T	T	T	T	T	T	T	T	T	T	T	T	T	T	T	T	Y	T	T	T	T	T	T	T	T	Y	T	T	T	T	Y	T	T	T	Y	T	T	T	T	T	T	T	T	T
S1D_51975569	A/C	1D	51975569	+	A	A	A	A	A	A	A	A	A	A	A	A	A	A	A	A	A	A	A	A	A	A	A	A	A	A	A	A	A	A	M	M	A	A	A	A	A	A	M	A	A	A	A	A	A
S1D_51975592	C/T	1D	51975592	+	C	C	C	C	C	C	C	C	C	C	C	C	C	C	C	C	C	C	C	C	C	C	C	C	C	C	C	C	C	C	Y	Y	C	C	C	C	C	C	Y	C	C	C	C	C	C
S1D_51975623	G/A	1D	51975623	+	G	G	G	G	G	G	G	G	G	G	G	G	G	G	G	G	G	G	G	G	G	G	G	G	G	G	G	G	G	G	R	R	G	G	G	G	G	G	R	G	G	G	G	G	G
S1D_52005464	T/C	1D	52005464	+	T	T	T	T	Y	T	T	T	T	T	T	T	T	T	T	T	T	T	Y	T	T	T	Y	Y	Y	T	T	T	T	T	T	T	T	T	T	T	T	T	T	T	T	T	T	T	T
S1D_52005494	G/A	1D	52005494	+	G	G	G	G	R	G	G	G	G	G	G	G	G	G	G	G	G	G	R	G	G	G	R	R	R	G	G	G	G	G	G	G	G	G	G	G	G	G	G	G	G	G	G	G	G
S1D_52005497	T/C	1D	52005497	+	T	T	T	T	Y	T	T	T	T	T	T	T	T	T	T	T	T	T	Y	T	T	T	Y	Y	Y	T	T	T	T	T	T	T	T	T	T	T	T	T	T	T	T	T	T	T	T
S1D_52022475	C/T	1D	52022475	+	C	C	C	Y	Y	Y	C	C	C	C	C	C	C	C	Y	Y	Y	C	C	C	C	Y	C	C	C	T	C	C	C	C	C	C	C	Y	C	C	C	C	C	C	T	C	C	C	C
S1D_52340932	G/A	1D	52340932	+	G	G	G	G	A	G	G	G	G	G	G	G	G	G	G	G	G	G	G	G	G	G	R	R	R	G	G	G	G	G	G	G	G	G	G	G	G	G	G	G	G	G	G	G	G
S1D_52340934	C/G	1D	52340934	+	C	C	C	C	G	C	C	C	C	C	C	C	C	C	C	C	C	C	C	C	C	C	S	S	S	C	C	C	C	C	C	C	C	C	C	C	C	C	C	C	C	C	C	C	C
S1D_52345234	T/A	1D	52345234	+	A	T	T	A	A	A	T	T	T	T	T	T	T	T	A	A	A	A	A	T	T	A	T	T	T	A	A	T	T	A	A	A	T	A	T	A	T	T	A	A	A	A	A	A	T
S1D_52345235	G/C	1D	52345235	+	C	G	G	C	C	C	G	G	G	G	G	G	G	G	C	C	C	C	C	G	G	C	G	G	G	C	C	G	G	C	C	C	G	C	G	C	G	G	C	C	C	C	C	C	G
S1D_52375741	A/T	1D	52375741	+	A	A	A	A	A	A	A	A	A	A	A	A	A	A	A	A	A	T	A	A	A	A	A	A	A	A	T	A	A	A	T	T	A	A	A	T	A	A	T	A	A	A	A	A	A
S1D_52413593	C/T	1D	52413593	+	C	C	C	C	C	C	C	C	C	C	C	C	C	C	C	C	C	T	C	C	C	C	C	C	C	C	T	C	C	C	T	T	C	C	C	T	C	C	T	C	C	C	C	C	C
S1D_52413610	T/A	1D	52413610	+	T	T	T	T	T	T	T	T	T	T	T	T	T	T	T	T	T	A	T	T	T	T	T	T	T	T	A	T	T	T	A	A	T	T	T	A	T	T	A	T	T	T	T	T	T
S1D_52462583	C/T	1D	52462583	+	T	C	C	C	C	C	C	C	C	C	C	C	C	C	C	C	C	C	T	C	C	C	C	C	C	C	C	C	C	T	C	C	C	C	C	C	C	C	C	T	C	T	C	T	C
S1D_52614974	G/A	1D	52614974	+	G	G	G	G	G	G	G	G	G	G	G	G	G	G	G	R	G	G	G	G	G	R	G	G	R	R	G	R	G	G	G	G	G	G	G	G	G	R	G	R	G	G	G	G	G
S1D_53248555	C/T	1D	53248555	+	C	C	C	C	C	C	C	C	C	C	C	C	C	C	C	C	C	Y	Y	C	C	C	C	C	C	C	C	C	C	C	Y	Y	C	C	C	C	C	C	C	C	C	C	Y	C	C
S1D_53505767	G/C	1D	53505767	+	G	G	G	G	G	G	G	G	G	G	G	G	G	G	G	G	G	C	G	G	G	G	G	G	G	G	C	G	G	G	C	C	G	G	G	C	G	G	C	G	G	G	G	G	G
S1D_54247952	A/G	1D	54247952	+	A	A	A	A	A	A	A	A	A	A	A	A	A	A	A	A	A	A	A	A	A	A	A	A	A	R	A	A	A	A	A	A	A	A	A	A	A	A	A	A	A	A	A	R	A
S1D_54247960	A/T	1D	54247960	+	A	A	W	A	A	A	A	A	A	A	A	A	A	A	W	A	A	W	A	A	W	A	A	A	A	A	A	W	A	A	A	A	A	A	A	A	A	A	A	A	A	A	A	W	A
S1D_54247986	G/A	1D	54247986	+	G	G	G	G	G	G	G	G	G	G	G	G	R	G	G	G	G	G	G	G	G	R	G	G	R	G	G	R	G	G	G	G	G	G	G	G	G	G	G	R	G	G	G	G	R
S1D_54248005	A/G	1D	54248005	+	A	A	A	A	A	A	A	G	A	R	A	A	A	A	A	A	R	R	A	A	A	A	A	A	A	A	A	A	A	A	R	A	R	A	A	A	R	A	R	R	A	A	A	R	A
S1D_55032117	T/A	1D	55032117	+	T	T	T	T	T	T	W	T	T	T	T	T	T	T	T	T	T	T	T	T	T	T	T	T	T	T	T	T	T	T	T	T	T	T	T	T	T	T	T	T	T	T	T	T	T
S1D_55032209	C/G	1D	55032209	+	S	C	C	C	C	C	C	C	C	S	C	C	S	C	C	C	C	C	C	C	C	C	C	S	C	C	C	C	C	C	C	C	C	S	S	C	C	C	C	C	C	C	C	C	S
S1D_55448650	G/A	1D	55448650	+	G	G	G	G	G	G	G	G	G	G	A	G	G	G	G	G	G	G	G	G	R	G	G	G	G	G	R	G	G	G	G	G	G	G	G	G	G	G	G	G	G	G	G	G	G
S1D_55448653	G/A	1D	55448653	+	G	G	G	G	G	G	G	G	G	G	G	G	G	A	G	G	R	G	G	G	G	G	G	R	G	G	G	G	G	A	G	G	G	G	G	G	G	G	G	G	G	G	A	G	G
S1D_55448655	A/G	1D	55448655	+	A	A	A	A	G	A	A	A	R	A	A	A	A	A	A	A	A	G	A	R	A	A	G	A	A	A	A	A	A	A	A	A	A	A	A	A	A	G	A	A	A	A	A	R	A
S1D_55448658	C/A	1D	55448658	+	C	C	C	C	C	C	C	C	M	C	C	C	C	C	C	C	C	C	C	C	C	C	C	C	C	C	C	C	C	C	M	C	C	C	C	C	M	C	M	C	C	C	C	C	M
S1D_55448660	G/T	1D	55448660	+	G	G	G	G	T	G	G	G	K	G	G	G	G	G	G	G	G	T	G	K	G	G	T	G	G	G	G	G	G	G	G	G	G	G	G	G	G	T	G	G	G	G	G	K	G
S1D_55448669	C/T	1D	55448669	+	C	C	C	T	C	C	C	C	C	C	C	Y	C	C	C	C	C	C	C	Y	C	T	C	C	C	C	C	Y	C	C	C	C	C	C	C	C	C	C	C	C	C	C	C	C	C
S1D_55448674	A/T	1D	55448674	+	A	A	A	A	A	A	A	W	A	A	A	A	A	A	A	A	A	A	A	A	W	A	A	A	W	A	A	A	A	A	A	A	A	A	A	A	A	A	A	A	A	A	A	A	A
S1D_55448675	C/T	1D	55448675	+	C	C	C	C	C	C	C	C	C	C	C	C	C	T	C	C	Y	C	C	C	C	C	C	Y	C	C	C	C	C	T	C	C	C	C	C	C	C	C	C	C	C	C	T	C	C
S1D_55448686	T/A	1D	55448686	+	A	T	T	T	T	T	T	W	T	A	T	T	T	T	A	T	T	T	T	T	T	T	T	T	T	T	W	T	T	T	T	T	W	T	T	T	T	T	W	T	T	T	T	T	T
S1D_55448688	G/A	1D	55448688	+	G	G	G	A	G	G	G	G	G	G	G	R	G	G	G	G	G	G	G	R	G	A	G	G	G	G	G	R	G	G	G	G	G	G	G	G	G	G	G	G	G	G	G	G	G
S1D_55572827	G/A	1D	55572827	+	R	G	G	G	G	G	G	G	G	G	G	G	G	G	G	G	G	G	G	G	R	G	G	G	G	G	G	G	G	G	G	G	G	G	G	G	G	G	G	G	G	G	G	G	G
S1D_55980151	C/A	1D	55980151	+	M	C	C	C	C	C	M	M	C	C	C	C	C	M	M	C	C	C	C	C	M	C	M	C	M	M	C	M	C	C	C	C	C	C	C	M	C	C	C	C	C	C	C	C	C
S1D_56135834	C/A	1D	56135834	+	C	C	C	C	M	C	C	C	C	C	C	C	M	C	C	C	C	C	C	C	C	C	M	M	M	C	C	C	C	C	C	C	C	C	C	C	C	C	C	C	C	C	C	C	C
S1D_56135845	C/T	1D	56135845	+	C	C	C	C	C	Y	C	C	C	C	C	Y	Y	Y	C	C	Y	Y	C	Y	Y	Y	C	C	Y	Y	C	Y	Y	C	C	C	C	C	C	C	C	C	C	C	C	C	C	C	C
S1D_56165657	A/G	1D	56165657	+	A	A	A	A	A	A	A	A	A	A	A	A	A	A	A	A	A	G	A	A	A	A	A	A	A	A	G	A	A	A	G	G	A	A	A	G	A	A	G	A	A	A	A	A	A
S1D_57161394	A/T	1D	57161394	+	A	A	A	A	A	A	A	A	A	A	A	A	A	A	A	A	A	W	A	A	A	A	A	A	A	A	W	A	A	A	W	W	A	A	A	W	A	A	W	A	A	A	A	A	A
S1D_57161397	A/T	1D	57161397	+	A	A	A	A	A	A	A	A	A	A	A	A	A	A	A	A	A	W	A	A	A	A	A	A	A	A	W	A	A	A	W	W	A	A	A	W	A	A	W	A	A	A	A	A	A
S1D_57161412	A/G	1D	57161412	+	A	A	A	A	A	A	A	A	A	A	A	A	A	A	A	A	A	R	A	A	A	A	A	A	A	A	R	A	A	A	R	R	A	A	A	R	A	A	R	A	A	A	A	A	A
S1D_57208033	T/C	1D	57208033	+	Y	T	T	T	T	T	T	T	T	Y	T	T	T	T	T	T	T	T	T	T	T	T	T	T	T	T	T	T	T	T	T	T	Y	T	T	Y	T	T	T	Y	T	Y	Y	Y	T
S1D_57208038	C/A	1D	57208038	+	M	C	C	C	C	C	C	C	C	M	C	C	C	C	C	C	C	C	C	C	C	C	C	C	C	C	C	C	C	C	C	C	M	C	C	M	C	C	C	M	C	M	M	M	C
S1D_58205208	C/T	1D	58205208	+	C	C	C	C	C	C	C	C	T	Y	C	C	Y	C	C	C	C	C	C	C	Y	C	C	C	C	C	C	C	C	C	C	C	C	C	C	C	C	C	C	C	Y	C	C	C	C
S1D_58205211	G/A	1D	58205211	+	G	G	G	G	G	G	G	G	A	R	G	G	R	G	G	G	G	G	G	G	R	G	G	G	G	G	G	G	G	G	G	G	G	G	G	G	G	G	G	G	R	G	G	G	G
S1D_58205240	T/G	1D	58205240	+	T	T	T	T	T	T	T	T	G	K	T	T	K	T	T	T	T	T	T	T	K	T	T	T	T	T	T	T	T	T	T	T	T	T	T	T	T	T	T	T	K	T	T	T	T
S1D_58669931	A/G	1D	58669931	+	A	A	R	A	A	A	A	A	A	A	A	A	A	A	A	A	A	A	A	A	A	A	A	R	A	A	A	A	R	A	A	A	A	A	A	A	A	A	A	A	A	R	R	A	A
S1D_58868035	T/C	1D	58868035	+	T	T	T	T	T	T	T	Y	T	T	T	T	T	T	T	T	T	T	Y	T	T	T	C	C	T	T	T	T	T	T	T	T	Y	T	C	T	T	T	T	Y	T	T	Y	T	T
S1D_58956577	G/T	1D	58956577	+	G	G	T	G	G	G	G	K	G	K	G	G	G	G	G	K	G	G	K	G	G	G	G	G	G	G	G	G	G	K	G	G	G	G	G	G	G	G	G	G	G	G	G	G	G
S1D_58956578	G/A	1D	58956578	+	G	G	A	G	G	G	G	R	G	R	G	G	G	G	G	R	G	G	R	G	G	G	G	G	G	G	G	G	G	R	G	G	G	G	G	G	G	G	G	G	G	G	G	G	G
S1D_58956602	G/T	1D	58956602	+	G	G	G	G	G	T	G	G	G	G	G	G	G	G	G	G	G	G	G	G	G	G	G	K	G	G	G	G	G	G	G	G	G	G	T	G	G	G	G	G	G	G	G	G	G
S1D_59004842	C/T	1D	59004842	+	C	C	C	C	C	C	C	C	C	C	C	C	C	C	C	C	C	C	C	C	C	C	C	Y	C	C	C	C	C	C	C	C	C	C	C	C	C	C	C	C	C	C	C	C	C
S1D_59004855	G/T	1D	59004855	+	G	G	G	T	G	G	G	G	G	K	G	G	G	K	G	T	G	G	G	G	G	K	K	G	G	G	G	G	G	G	G	G	G	G	G	G	G	K	K	G	G	G	G	K	G
S1D_59004856	A/T	1D	59004856	+	A	A	W	A	A	A	A	A	A	A	A	A	A	W	A	A	A	A	T	A	A	A	A	A	A	A	A	W	A	A	A	A	A	A	A	A	A	A	A	A	A	A	A	A	A
S1D_59004865	G/A	1D	59004865	+	G	G	G	A	G	G	G	G	G	R	G	G	G	R	G	A	G	G	G	G	G	R	R	G	G	G	G	G	G	G	G	G	G	G	G	G	G	R	R	G	G	G	G	R	G
S1D_59004881	G/T	1D	59004881	+	G	G	G	G	G	G	G	G	K	G	G	G	G	G	G	G	K	G	G	G	G	G	K	G	K	G	G	G	G	K	K	G	G	K	K	K	K	K	G	G	G	K	G	G	G
S1D_59004886	G/A	1D	59004886	+	G	G	G	G	G	G	G	G	R	G	G	G	G	G	G	G	R	G	G	G	G	G	R	G	R	G	G	G	G	R	R	G	G	R	R	R	R	R	G	G	G	R	G	G	G
S1D_59005204	C/A	1D	59005204	+	M	C	M	C	C	C	C	C	C	C	C	C	C	C	M	C	C	C	C	C	C	C	C	C	C	C	C	C	C	M	C	C	C	C	C	C	C	C	C	M	C	C	C	C	C
S1D_59005227	C/G	1D	59005227	+	C	C	C	C	C	C	C	C	C	C	C	C	C	C	C	C	C	C	S	C	C	C	C	C	C	C	C	C	C	C	C	C	C	C	C	C	C	C	C	C	C	C	S	C	C
S1D_59010355	A/T	1D	59010355	+	W	A	W	A	A	A	A	A	W	A	A	A	A	A	A	A	A	A	A	A	A	A	A	A	A	A	A	A	A	A	A	A	W	A	A	W	A	A	A	A	A	W	A	A	A
S1D_59028534	G/A	1D	59028534	+	G	G	G	G	G	G	G	G	R	G	G	G	G	G	R	G	R	G	G	R	G	G	G	R	G	G	G	G	G	G	G	G	G	G	G	G	G	G	G	G	G	G	G	G	G
S1D_59028552	G/T	1D	59028552	+	T	G	K	G	G	G	K	G	G	G	G	G	G	G	G	G	G	G	G	G	G	G	G	G	G	K	G	G	G	K	G	G	G	G	G	G	G	G	G	G	G	G	G	G	G
S1D_59187895	G/T	1D	59187895	+	G	K	G	K	G	G	G	G	K	G	G	G	G	K	K	G	G	G	G	K	G	G	G	G	G	G	G	G	G	G	K	G	G	G	K	G	G	K	K	G	G	K	G	G	G
S1D_59187910	G/T	1D	59187910	+	G	G	G	G	G	G	G	G	G	G	G	G	K	K	G	G	G	G	G	G	G	G	G	G	G	G	K	G	G	G	G	G	G	G	G	G	G	K	G	G	G	G	T	G	G
S1D_59187914	A/G	1D	59187914	+	A	A	A	A	A	A	A	A	A	A	A	A	R	R	A	A	A	A	A	A	A	G	A	A	A	A	R	A	A	A	A	A	A	A	A	A	A	R	A	A	A	A	G	R	A
S1D_59187927	G/A	1D	59187927	+	G	R	G	R	G	G	G	G	R	G	G	G	G	R	R	G	G	G	G	R	G	G	G	G	G	G	G	G	G	G	R	G	G	G	R	G	G	R	R	G	G	R	G	G	G
S1D_59187935	G/A	1D	59187935	+	G	G	G	G	G	G	G	G	G	G	G	G	R	R	G	G	G	G	G	G	G	G	G	G	G	G	R	G	G	G	G	G	G	G	G	G	G	R	G	G	G	G	A	G	G
S1D_59569888	G/A	1D	59569888	+	G	G	G	G	G	G	G	G	G	G	G	G	G	G	G	G	G	A	G	G	G	G	G	G	G	G	A	G	G	G	A	A	G	G	G	A	G	G	A	G	G	G	G	G	G
S1D_59743972	T/C	1D	59743972	+	T	T	T	T	T	T	T	T	T	T	T	T	T	T	T	T	T	T	T	T	T	T	T	T	T	T	C	T	T	T	C	C	T	T	T	C	T	T	C	T	T	T	T	T	T
S1D_60214404	A/G	1D	60214404	+	R	R	R	A	R	A	A	A	A	A	A	A	A	A	A	A	A	A	A	A	A	A	A	A	A	R	A	A	A	A	A	A	R	A	A	A	A	A	A	A	A	A	A	A	A
S1D_60326203	T/C	1D	60326203	+	T	T	T	T	T	T	Y	T	T	T	T	T	T	T	Y	T	T	T	T	T	T	T	T	T	T	T	T	T	T	T	T	T	Y	T	T	Y	T	T	T	T	T	T	T	T	T
S1D_60326210	C/T	1D	60326210	+	C	C	C	C	C	C	C	Y	Y	T	Y	Y	C	C	C	T	C	C	C	Y	C	Y	C	C	C	C	Y	C	C	C	C	C	C	C	C	C	T	C	C	C	C	C	C	C	C
S1D_60326220	G/T	1D	60326220	+	G	G	G	G	G	G	K	G	G	G	G	G	G	G	K	G	G	G	G	G	G	G	G	G	G	G	G	G	G	G	G	G	K	G	G	K	G	G	G	G	G	G	G	G	G
S1D_60326234	G/A	1D	60326234	+	G	G	G	R	G	G	G	G	G	G	G	G	G	R	G	G	G	G	G	G	G	R	R	G	R	G	G	G	G	G	G	G	G	G	G	R	G	G	A	G	G	G	G	G	G
S1D_60326236	A/C	1D	60326236	+	A	A	A	M	A	A	A	A	A	A	A	A	A	M	A	A	A	A	A	A	A	M	M	A	M	A	A	A	A	A	A	A	A	A	A	M	A	A	C	A	A	A	A	A	A
S1D_60326240	A/G	1D	60326240	+	R	A	A	A	A	A	R	R	A	A	A	A	R	A	A	A	R	A	A	A	A	A	R	A	A	A	A	A	A	A	R	G	R	A	A	R	A	A	A	A	A	A	A	R	A
S1D_60326247	C/A	1D	60326247	+	M	C	C	C	C	C	M	M	C	C	C	C	M	C	C	C	M	C	C	C	C	C	M	C	C	C	C	C	C	C	M	A	M	C	C	M	C	C	C	C	C	C	C	M	C
S1D_60339970	C/T	1D	60339970	+	C	C	C	C	C	C	C	C	C	C	Y	C	C	C	C	C	C	C	C	C	C	C	C	C	C	C	C	Y	C	Y	C	C	C	C	Y	C	C	C	C	C	C	C	Y	C	C
S1D_60339994	C/T	1D	60339994	+	C	C	C	C	C	C	C	C	C	C	C	C	C	C	C	C	C	Y	C	C	C	C	C	C	C	C	Y	C	C	C	Y	Y	C	C	C	Y	C	C	Y	C	C	C	C	C	C
S1D_60339995	G/A	1D	60339995	+	G	G	G	G	G	G	G	G	G	G	R	G	G	G	R	R	R	G	G	G	G	G	G	G	G	G	G	G	G	G	G	G	G	G	G	G	G	G	G	G	G	G	G	G	G
S1D_60639099	T/C	1D	60639099	+	T	T	Y	T	T	T	T	T	T	T	T	T	T	T	T	T	T	T	Y	T	T	Y	T	T	Y	T	T	T	T	T	T	T	T	T	Y	T	Y	Y	T	T	T	T	T	T	Y
S1D_60639100	C/A	1D	60639100	+	C	C	C	C	C	M	C	C	C	C	C	C	C	C	C	C	C	C	C	C	C	C	M	C	C	C	C	C	C	C	C	C	C	C	C	C	C	C	C	M	C	C	C	C	C
S1D_60639129	G/C	1D	60639129	+	G	G	G	G	G	G	G	G	G	G	G	S	S	S	G	G	G	G	G	G	S	G	G	G	G	G	G	G	G	S	G	G	G	G	G	S	G	G	S	G	G	G	G	G	G
S1D_60639131	T/C	1D	60639131	+	T	T	Y	T	T	T	T	T	T	T	T	T	T	T	T	T	T	T	Y	T	T	Y	T	T	Y	T	T	T	T	T	T	T	T	T	Y	T	Y	Y	T	T	T	T	T	T	Y
S1D_60679276	A/G	1D	60679276	+	R	A	A	A	A	R	A	A	A	A	A	A	A	A	R	A	A	A	A	A	A	A	A	A	A	A	A	A	A	A	A	A	A	A	A	R	A	A	A	R	A	R	A	A	A
S1D_60679287	C/T	1D	60679287	+	C	C	C	C	C	Y	C	C	C	C	C	C	C	C	C	C	T	C	Y	C	C	C	C	C	C	Y	C	C	C	Y	C	C	C	T	C	C	C	C	C	C	T	Y	C	Y	C
S1D_61317634	T/A	1D	61317634	+	A	T	T	W	A	A	T	T	T	T	T	T	T	T	A	A	A	A	A	T	T	A	T	T	T	A	A	T	T	A	A	A	T	A	T	A	T	T	A	A	A	A	T	A	T
S1D_61755219	A/G	1D	61755219	+	A	A	A	A	A	A	A	A	A	A	A	A	A	A	A	A	A	G	A	A	A	A	A	A	A	A	G	A	A	A	G	G	A	A	A	R	A	A	G	A	A	A	A	A	A
S1D_61765134	C/A	1D	61765134	+	C	C	C	C	C	C	C	C	C	C	C	C	C	C	C	C	C	A	C	C	C	C	C	C	C	C	A	C	C	C	A	M	C	C	C	A	C	C	M	C	C	C	C	C	C
S1D_62876833	T/A	1D	62876833	+	A	T	T	A	A	A	T	T	T	T	T	T	T	T	A	A	A	T	A	T	T	A	T	T	T	A	T	T	T	A	T	T	T	A	T	T	T	T	T	A	A	A	T	A	T
S1D_62916625	G/A	1D	62916625	+	G	G	G	G	R	G	G	G	G	R	G	R	G	G	G	G	A	G	G	G	G	G	A	R	R	G	R	G	A	G	G	G	G	G	G	G	G	G	G	G	G	G	G	G	G
S1D_63218057	T/A	1D	63218057	+	T	T	T	T	W	W	T	T	T	T	T	T	T	T	W	W	T	T	W	T	T	W	T	T	T	T	T	T	T	W	T	T	T	T	T	T	T	T	T	W	W	W	T	W	T
S1D_64113357	A/G	1D	64113357	+	A	A	A	R	A	A	A	A	R	A	A	A	A	A	A	A	A	A	A	A	R	A	A	A	A	A	A	A	A	R	A	A	A	A	A	A	A	A	A	A	A	A	A	A	A
S1D_64113392	G/T	1D	64113392	+	G	G	G	K	G	G	G	G	K	G	G	G	G	G	G	G	G	G	G	G	K	G	G	G	G	G	G	G	G	K	G	G	G	G	G	G	G	G	G	G	G	G	G	G	G
S1D_64113395	G/A	1D	64113395	+	G	G	G	R	G	G	G	G	R	G	G	G	G	G	G	G	G	G	G	G	R	G	G	G	G	G	G	G	G	R	G	G	G	G	G	G	G	G	G	G	G	G	G	G	G
S1D_64113408	G/A	1D	64113408	+	G	G	G	G	G	G	G	G	G	G	G	G	G	R	R	G	G	G	R	G	G	G	G	G	G	G	R	G	G	G	G	G	G	G	G	G	G	G	G	G	G	G	R	G	G
S1D_64426335	T/C	1D	64426335	+	C	T	T	C	C	C	T	T	T	T	T	T	T	T	C	C	C	T	C	T	T	C	T	T	T	C	T	T	T	C	T	T	T	C	T	T	T	T	T	C	C	C	T	C	T
S1D_64621324	G/T	1D	64621324	+	G	G	G	G	G	G	G	G	G	G	G	G	G	G	G	G	G	K	G	G	G	G	G	G	G	G	T	G	G	G	K	K	G	G	G	K	G	G	T	G	G	G	G	G	G
S1D_64636124	A/G	1D	64636124	+	A	A	R	A	A	A	A	A	A	A	R	A	R	A	A	R	A	A	A	A	A	A	A	A	A	A	A	A	A	A	A	A	A	A	R	A	A	A	R	A	A	A	A	A	A
S1D_64636146	C/T	1D	64636146	+	C	C	Y	C	C	C	C	C	C	C	Y	C	Y	C	C	Y	C	C	C	C	C	C	C	C	C	C	C	C	C	C	C	C	C	C	Y	C	C	C	Y	C	C	C	C	C	C
S1D_64734831	C/A	1D	64734831	+	C	C	A	C	C	C	C	C	C	C	C	C	C	C	C	M	C	C	C	C	C	C	C	C	C	C	C	C	C	C	C	C	C	C	C	M	C	C	C	M	C	C	C	C	C
S1D_64879297	G/A	1D	64879297	+	G	G	G	G	G	G	G	G	G	G	R	R	G	G	G	G	G	G	G	G	G	G	G	G	R	G	G	R	R	G	G	G	G	G	G	G	G	G	G	G	G	G	G	G	G
S1D_64879309	T/C	1D	64879309	+	T	T	T	T	T	T	T	Y	T	T	Y	T	T	T	T	T	T	T	T	T	T	T	Y	T	T	T	T	Y	Y	T	T	T	T	T	T	T	T	T	T	T	T	T	T	T	Y
S1D_64879313	C/T	1D	64879313	+	C	C	C	Y	C	Y	C	C	C	C	C	C	C	C	Y	C	Y	C	Y	C	C	Y	C	C	C	T	C	C	C	C	C	C	C	Y	C	C	C	C	C	Y	Y	Y	C	Y	C
S1D_64879332	C/T	1D	64879332	+	C	C	C	C	C	C	C	Y	C	C	Y	C	C	C	C	C	C	C	C	C	C	C	Y	C	C	C	C	Y	Y	C	C	C	C	C	C	C	C	C	C	C	C	C	C	C	Y
S1D_65238502	G/C	1D	65238502	+	G	G	G	G	G	G	S	G	S	G	G	G	G	G	G	S	G	G	S	G	G	G	G	G	G	S	G	G	G	G	G	G	S	G	G	S	G	G	G	G	G	G	S	S	G
S1D_65413893	C/T	1D	65413893	+	C	C	C	C	C	C	C	C	C	C	Y	C	C	Y	C	C	Y	C	C	C	C	C	C	C	Y	C	C	T	C	C	C	C	C	C	C	C	C	C	C	C	C	C	C	C	C
S1D_65448221	A/T	1D	65448221	+	A	A	A	W	A	A	A	A	W	A	A	A	A	A	A	A	A	A	A	A	A	A	A	A	A	A	A	A	W	A	A	A	A	A	A	A	A	A	A	A	A	A	A	A	W
S1D_65789025	C/A	1D	65789025	+	C	C	C	C	C	C	M	C	C	C	C	C	C	M	C	C	C	C	C	C	C	C	C	C	C	C	C	C	C	C	C	C	C	C	C	C	C	C	C	C	C	C	C	C	C
S1D_65900027	A/T	1D	65900027	+	A	A	A	W	A	A	A	A	A	A	A	A	A	A	A	A	A	A	A	W	A	A	A	A	A	W	W	A	A	T	A	A	A	A	A	T	A	A	A	A	A	T	A	A	A
S1D_66465593	C/T	1D	66465593	+	C	C	C	C	C	C	C	C	C	C	C	C	Y	Y	C	C	C	C	C	C	Y	C	C	C	C	C	C	C	C	C	Y	Y	C	C	C	Y	C	C	C	C	C	C	C	C	C
S1D_66465598	C/T	1D	66465598	+	C	C	C	C	C	C	C	T	C	C	C	C	C	C	Y	C	C	C	C	C	C	C	C	C	C	C	C	C	C	C	C	C	C	C	C	C	C	C	C	C	C	C	C	C	Y
S1D_66465620	G/A	1D	66465620	+	G	G	G	G	G	G	G	A	G	G	G	G	G	G	R	G	G	G	G	G	G	G	G	G	G	G	G	G	G	G	G	G	G	G	G	G	G	G	G	G	G	G	G	G	R
S1D_68797432	G/A	1D	68797432	+	G	G	G	G	G	G	G	G	G	G	R	G	G	G	R	R	G	G	A	G	G	G	G	G	G	G	G	G	G	A	G	G	G	G	R	G	G	R	G	G	G	G	G	G	G
S1D_68885091	G/C	1D	68885091	+	G	S	G	G	G	G	G	G	G	G	G	G	G	S	G	G	S	G	G	G	G	S	G	G	G	G	S	G	G	G	S	G	G	G	G	S	G	G	S	G	G	G	G	G	G
S1D_68885100	G/A	1D	68885100	+	G	R	G	G	G	G	G	G	G	G	G	G	G	R	G	G	R	G	G	G	G	R	G	G	G	G	R	G	G	G	R	G	G	G	G	R	G	G	R	G	G	G	G	G	G
S1D_68885101	A/T	1D	68885101	+	A	W	A	A	A	A	A	A	A	A	A	A	A	W	A	A	W	A	A	A	A	W	A	A	A	A	W	A	A	A	W	A	A	A	A	W	A	A	W	A	A	A	A	A	A
S1D_68941460	G/A	1D	68941460	+	G	G	R	G	R	G	G	R	G	G	G	G	G	G	G	G	G	G	G	G	G	G	G	G	G	G	G	G	G	G	G	G	G	G	G	R	G	G	G	R	G	G	G	G	G
S1D_68941466	C/G	1D	68941466	+	C	C	S	C	S	C	C	S	C	C	C	C	C	C	C	C	C	C	C	C	C	C	C	C	C	C	C	C	C	C	C	C	C	C	C	S	C	C	C	S	C	C	C	C	C
S1D_68941482	G/A	1D	68941482	+	G	G	R	R	R	G	R	G	G	G	G	G	G	G	G	G	G	R	G	G	G	G	G	G	G	R	R	G	R	G	G	G	G	G	G	G	G	G	G	G	G	G	G	G	G
S1D_69041095	G/A	1D	69041095	+	G	G	G	G	G	G	G	G	G	G	G	G	G	G	G	G	G	G	R	G	G	G	G	G	A	G	A	G	G	G	G	G	G	G	G	G	G	G	G	G	G	G	G	G	G
S1D_69041102	T/C	1D	69041102	+	T	T	T	T	T	T	T	T	T	T	T	T	T	T	T	T	T	T	Y	T	T	T	T	T	C	T	C	T	T	T	T	T	T	T	T	T	T	T	T	T	T	T	T	T	T
S1D_69041118	T/C	1D	69041118	+	T	T	T	T	T	T	T	T	T	T	T	T	T	T	T	T	T	T	Y	T	T	T	T	T	C	T	C	T	T	T	T	T	T	T	T	T	T	T	T	T	T	T	T	T	T
S1D_69052115	G/C	1D	69052115	+	G	G	G	S	S	G	S	G	G	S	G	G	G	G	G	G	G	G	S	G	G	G	G	G	G	G	G	G	G	G	G	S	S	G	G	G	G	G	G	G	G	G	S	S	G
S1D_69314089	C/T	1D	69314089	+	C	C	C	C	C	C	C	C	Y	C	C	C	C	C	C	C	C	C	C	C	C	C	Y	C	C	C	C	C	C	C	C	C	C	Y	C	C	C	C	Y	C	C	C	C	C	C
S1D_69314094	G/T	1D	69314094	+	G	G	G	G	G	G	G	G	G	G	G	G	G	G	G	G	G	G	G	G	G	G	G	K	G	G	G	G	G	G	G	G	G	G	G	G	G	G	G	G	K	G	G	G	G
S1D_69314102	G/A	1D	69314102	+	G	R	G	R	G	G	R	G	R	G	G	G	R	G	G	G	G	G	G	G	R	G	G	G	R	R	G	R	G	G	G	G	G	G	R	R	G	G	G	R	G	G	G	G	G
S1D_69314113	A/G	1D	69314113	+	A	A	A	A	A	A	A	A	R	A	A	A	A	A	A	A	A	A	A	A	A	A	R	A	A	A	A	A	A	A	A	A	A	R	A	A	A	A	R	A	A	A	A	A	A
S1D_69314116	G/A	1D	69314116	+	G	G	R	G	G	G	G	G	G	G	G	G	G	G	G	G	G	G	G	G	R	G	G	G	G	G	G	R	R	G	R	G	G	G	G	G	G	G	R	G	G	G	R	R	G
S1D_69592053	C/A	1D	69592053	+	M	C	C	C	C	A	C	C	C	C	C	M	C	M	C	C	C	C	C	M	M	C	C	C	C	C	C	C	M	C	C	C	C	M	C	C	M	C	C	M	M	C	C	C	C
S1D_72595068	G/A	1D	72595068	+	R	G	R	G	G	G	R	G	G	R	G	G	G	G	G	G	G	G	G	G	G	R	G	G	G	G	G	G	G	G	G	G	G	G	G	R	G	G	G	R	G	R	R	G	G
S1D_72814312	A/G	1D	72814312	+	A	R	R	A	A	A	A	A	A	A	G	R	A	A	A	A	A	A	A	A	A	A	A	A	A	A	A	A	A	R	A	A	R	A	A	A	A	R	A	R	A	A	A	A	A
S1D_73288608	T/C	1D	73288608	+	T	T	T	T	T	T	T	T	T	T	T	T	T	T	T	T	T	C	T	T	T	T	T	T	T	T	T	T	T	T	T	T	T	T	T	C	T	T	C	T	T	T	T	T	T
S1D_73288616	A/C	1D	73288616	+	A	A	A	A	A	A	A	A	A	A	A	A	A	A	A	A	A	C	A	A	A	A	A	A	A	A	C	A	A	A	C	C	A	A	A	C	A	A	C	A	A	A	A	A	A
S1D_74755323	G/A	1D	74755323	+	G	G	R	G	G	G	G	G	G	G	G	G	G	G	G	G	G	G	G	G	G	G	G	G	G	G	A	R	G	G	A	A	G	G	G	G	G	G	G	G	G	G	G	G	G
S1D_74920125	T/G	1D	74920125	+	K	T	T	T	T	T	T	T	T	T	K	K	T	T	T	K	T	K	T	T	T	T	T	T	T	T	T	T	T	T	K	T	T	T	T	T	T	T	T	T	K	K	T	T	T
S1D_74920142	G/A	1D	74920142	+	R	G	G	G	G	G	G	G	G	G	G	G	G	G	G	G	G	G	G	G	G	G	G	G	R	G	R	G	R	G	G	G	R	G	R	G	R	G	G	G	G	G	G	G	G
S1D_74920166	T/G	1D	74920166	+	T	T	T	T	T	T	T	T	T	T	T	T	T	K	T	K	T	T	K	T	T	T	K	K	T	T	T	T	T	T	T	T	T	T	K	T	T	T	K	T	K	T	T	T	T
S1D_74920180	G/T	1D	74920180	+	G	K	K	G	G	G	G	K	K	K	G	G	G	G	G	G	G	G	G	G	G	K	G	G	G	G	G	K	G	G	G	G	G	G	G	G	K	G	G	K	G	K	G	G	G
S1D_75407094	A/C	1D	75407094	+	A	A	A	A	A	A	A	A	A	A	A	A	A	A	A	A	A	A	A	A	A	A	A	A	A	A	C	A	A	A	C	C	A	A	A	A	A	A	A	A	A	A	A	A	A
S1D_75575134	G/C	1D	75575134	+	C	S	G	S	G	G	S	G	G	G	G	G	G	G	G	G	G	G	G	G	G	G	G	G	G	G	G	G	G	G	G	G	G	G	G	G	G	G	G	S	G	G	G	G	G
S1D_76651155	C/A	1D	76651155	+	C	C	C	C	C	C	C	A	C	C	C	C	C	M	C	C	C	M	A	M	C	C	M	C	A	C	M	C	C	A	C	C	C	C	C	M	M	C	M	M	C	C	C	C	M
S1D_78046288	G/A	1D	78046288	+	G	G	G	G	R	G	R	G	R	R	G	G	R	G	G	G	G	G	G	G	G	G	G	G	G	G	G	R	G	G	G	G	G	G	A	G	G	G	G	G	G	G	G	G	G
S1D_78046291	T/C	1D	78046291	+	T	T	T	T	Y	T	Y	T	Y	Y	T	T	Y	T	T	T	T	T	T	T	T	T	T	T	T	T	T	Y	T	T	T	T	T	T	C	T	T	T	T	T	T	T	T	T	T
S1D_78046303	C/G	1D	78046303	+	C	C	C	C	S	C	S	C	S	S	C	C	S	C	C	C	C	C	C	C	C	C	C	C	C	C	C	S	C	C	C	C	C	C	G	C	C	C	C	C	C	C	C	C	C
S1D_78061885	G/A	1D	78061885	+	G	G	G	G	G	A	G	G	G	G	G	G	G	G	G	G	G	G	G	G	G	G	G	G	G	G	G	G	G	G	G	G	G	G	G	G	G	G	G	G	G	G	G	G	G
S1D_78062417	T/C	1D	78062417	+	T	T	T	T	T	T	T	T	T	T	T	T	T	Y	T	T	T	T	T	T	T	T	T	T	T	T	C	T	T	T	T	Y	T	T	T	C	T	T	Y	T	T	T	T	T	T
S1D_79267280	G/T	1D	79267280	+	G	G	G	G	G	G	G	G	G	G	G	G	G	T	G	G	G	T	G	G	G	G	G	G	G	G	T	G	G	G	T	T	G	G	G	T	G	G	T	G	G	G	G	G	G
S1D_79296928	C/T	1D	79296928	+	C	C	C	C	C	C	C	C	C	C	C	C	C	C	C	C	C	C	C	C	C	C	C	C	C	C	C	C	C	Y	Y	C	C	Y	C	C	C	C	C	C	C	C	C	C	C
S1D_79296938	A/G	1D	79296938	+	A	A	A	A	A	A	A	A	A	A	A	A	A	A	A	A	A	A	A	A	A	A	A	A	A	A	A	A	A	R	R	A	A	R	A	A	A	A	A	A	A	A	A	A	A
S1D_79296950	G/A	1D	79296950	+	G	G	G	G	G	G	G	G	G	G	G	G	G	G	G	G	G	G	G	G	G	G	G	G	G	G	G	G	G	R	R	G	G	R	G	G	G	G	G	G	G	G	G	G	G
S1D_79296979	A/G	1D	79296979	+	A	A	A	A	A	A	A	A	A	A	A	A	A	A	A	A	A	A	A	A	A	A	A	A	A	A	A	A	A	R	R	A	A	R	A	A	A	A	A	A	A	A	A	A	A
S1D_79690022	C/T	1D	79690022	+	C	C	C	C	C	T	C	C	C	C	C	C	C	C	C	C	C	C	C	C	C	C	C	C	C	C	C	C	C	C	C	C	C	C	C	C	C	C	C	C	C	C	C	C	C
S1D_79749722	G/C	1D	79749722	+	G	G	G	G	G	G	G	S	G	S	G	G	G	G	S	G	G	S	G	G	G	G	G	S	G	G	G	G	G	G	G	G	S	S	G	S	S	S	G	G	G	G	S	G	G
S1D_81216596	G/A	1D	81216596	+	G	G	G	G	G	G	G	G	G	G	G	G	G	G	G	G	G	A	G	G	G	G	G	G	G	G	G	G	G	G	R	R	G	G	G	G	G	G	R	G	G	G	G	G	G
S1D_81266999	C/T	1D	81266999	+	Y	C	C	C	C	C	C	C	C	C	Y	C	C	C	C	C	C	C	C	C	C	C	Y	Y	Y	C	C	C	C	T	C	C	Y	C	Y	Y	C	Y	C	Y	C	Y	Y	C	C
S1D_81267017	G/A	1D	81267017	+	R	G	G	G	G	G	G	G	G	G	R	G	G	G	G	G	G	G	G	G	G	G	R	R	R	G	G	G	G	A	G	G	R	G	R	R	G	R	G	R	G	R	R	G	G
S1D_81347861	C/T	1D	81347861	+	C	C	C	C	C	Y	C	C	C	C	C	C	C	C	C	C	C	C	C	C	C	C	C	C	C	C	C	C	C	C	C	C	C	C	C	C	C	C	C	C	C	C	C	C	C
S1D_81457264	C/G	1D	81457264	+	C	C	C	S	S	C	C	C	C	C	S	C	C	C	C	C	C	C	S	C	C	C	C	C	C	C	C	C	C	C	C	C	C	S	C	C	C	C	S	C	C	C	C	C	C
S1D_81637776	T/A	1D	81637776	+	T	T	T	T	T	T	T	T	T	T	T	T	T	T	T	T	T	T	T	T	T	T	T	T	T	T	W	T	T	T	W	W	T	T	T	W	T	T	W	T	T	T	T	T	T
S1D_82036481	T/C	1D	82036481	+	T	T	T	T	T	C	T	T	T	T	T	T	T	T	T	T	T	C	T	T	T	T	T	T	T	T	C	T	T	T	C	C	T	T	T	C	T	T	C	T	T	T	T	T	T
S1D_82036542	G/A	1D	82036542	+	G	G	G	G	G	A	G	G	G	G	G	G	G	G	G	G	G	G	G	G	G	G	G	G	G	G	G	G	G	G	G	G	G	G	G	G	G	G	G	G	G	G	G	G	G
S1D_82036566	G/T	1D	82036566	+	G	G	G	G	G	G	G	G	G	G	G	G	G	G	G	G	G	T	G	G	G	G	G	G	G	G	T	G	G	G	T	T	G	G	G	T	G	G	T	G	G	G	G	G	G
S1D_82330910	C/A	1D	82330910	+	C	C	C	C	C	C	C	C	C	C	C	M	C	C	M	C	C	C	C	C	M	C	C	M	M	C	C	M	M	C	C	C	M	C	C	C	C	M	M	C	C	C	M	C	C
S1D_83112399	C/T	1D	83112399	+	C	C	C	C	C	C	C	C	C	C	C	C	C	C	C	C	C	T	C	C	C	C	C	C	C	C	Y	C	C	C	C	T	C	C	C	C	C	C	Y	C	C	C	C	C	C
S1D_83112428	A/G	1D	83112428	+	A	A	A	A	A	A	A	A	A	A	A	A	A	A	A	A	A	G	A	A	A	A	A	A	A	A	G	A	A	A	G	G	A	A	A	G	A	A	G	A	A	A	A	A	A
S1D_83747044	T/C	1D	83747044	+	T	T	T	T	T	T	T	T	T	T	T	T	T	T	T	T	T	C	T	T	T	T	T	T	T	T	C	T	T	T	C	C	T	T	T	C	T	T	C	T	T	T	T	T	T
S1D_83747105	C/T	1D	83747105	+	C	C	C	C	C	C	C	C	Y	C	C	C	Y	C	C	C	C	C	C	C	C	C	C	C	Y	C	C	C	C	C	C	Y	Y	Y	C	C	Y	Y	C	C	C	C	C	C	C
S1D_83747659	C/G	1D	83747659	+	C	C	C	C	C	C	C	C	C	C	C	C	C	C	C	C	C	G	C	C	C	C	C	C	C	C	G	C	C	C	G	G	C	C	C	G	C	C	G	C	C	C	C	C	C
S1D_84399451	A/G	1D	84399451	+	A	A	A	A	A	A	A	R	A	A	R	A	A	R	A	A	A	A	A	A	A	A	A	A	A	A	A	A	R	A	A	A	R	A	A	A	A	A	A	A	A	A	A	A	R
S1D_84399481	A/C	1D	84399481	+	A	A	A	A	A	A	A	M	A	A	M	A	A	M	A	A	A	A	A	A	A	A	A	A	A	A	A	A	M	A	A	A	M	A	A	A	A	A	A	A	A	A	A	A	M
S1D_84568784	C/G	1D	84568784	+	C	C	C	C	C	C	C	C	C	C	C	C	C	S	C	C	C	S	C	C	C	C	C	C	C	C	C	C	C	C	S	C	C	C	C	S	C	C	S	C	C	C	C	C	C
S1D_84568803	C/A	1D	84568803	+	C	C	C	C	C	C	C	C	C	C	C	C	C	M	C	C	C	M	C	C	C	C	C	C	C	C	C	C	C	C	M	C	C	C	C	M	C	C	M	C	C	C	C	C	C
S1D_84568827	T/A	1D	84568827	+	T	T	T	T	T	T	T	T	T	T	T	T	T	W	T	T	T	W	T	T	T	T	T	T	T	T	T	T	T	T	W	T	T	T	T	W	T	T	W	T	T	T	T	T	T
S1D_85367980	G/T	1D	85367980	+	G	G	G	G	G	G	G	G	G	G	G	G	G	G	G	G	G	K	G	G	G	G	G	G	K	G	G	G	G	G	G	G	G	G	G	K	G	K	G	G	G	G	K	K	G
S1D_85367992	C/T	1D	85367992	+	C	C	C	C	C	C	C	C	C	C	Y	C	C	Y	Y	C	Y	Y	C	C	C	C	C	C	C	C	C	C	C	C	C	Y	C	C	Y	C	C	C	C	C	C	C	C	C	C
S1D_85367994	G/T	1D	85367994	+	G	G	G	G	G	G	G	G	G	G	G	G	G	G	G	G	G	K	G	G	G	G	G	G	K	G	K	G	G	G	G	K	G	G	G	T	G	K	G	G	G	G	G	K	G
S1D_85368009	G/A	1D	85368009	+	G	G	G	G	G	G	G	G	G	G	G	G	G	G	G	G	G	R	G	G	G	G	G	G	G	G	R	G	G	G	R	R	G	G	G	R	G	G	G	G	G	G	G	G	G
S1D_85368028	C/T	1D	85368028	+	Y	C	C	C	C	C	C	C	C	Y	C	C	C	C	Y	T	C	C	Y	C	C	C	C	C	C	C	C	C	Y	C	C	C	Y	C	C	C	C	C	C	C	C	Y	C	Y	C
S1D_86030562	G/T	1D	86030562	+	G	G	G	G	G	G	G	G	G	G	G	G	G	G	G	G	G	K	G	G	G	G	G	G	G	G	G	G	G	G	K	K	G	G	G	K	G	G	K	G	G	G	G	G	G
S1D_86030610	G/A	1D	86030610	+	G	G	G	G	G	G	G	G	G	G	G	G	G	G	G	G	G	R	G	G	G	G	G	G	G	G	R	G	G	G	R	R	G	G	G	R	G	G	R	G	G	G	G	G	G
S1D_86037776	C/A	1D	86037776	+	C	M	C	C	A	C	C	C	C	C	C	C	A	C	C	C	C	C	A	C	C	C	A	A	A	C	C	C	C	C	C	C	C	C	C	C	C	C	C	C	C	C	C	C	C
S1D_86816653	G/A	1D	86816653	+	G	G	G	G	G	G	G	G	G	G	G	G	G	G	G	G	G	G	G	G	G	G	G	G	G	G	A	G	G	G	R	R	G	G	G	R	G	G	R	G	G	G	G	G	G
S1D_89163332	T/G	1D	89163332	+	T	T	T	T	T	T	T	T	T	T	T	T	T	T	T	T	T	G	T	T	T	T	T	T	T	T	G	T	T	T	G	G	T	T	T	G	T	T	G	T	T	T	T	T	T
S1D_89163350	C/G	1D	89163350	+	C	C	C	C	C	C	C	C	C	C	C	C	C	C	C	C	C	G	C	C	C	C	C	C	C	C	G	C	C	C	G	G	C	C	C	G	C	C	G	C	C	C	C	C	C
S1D_90588405	G/A	1D	90588405	+	R	R	G	G	G	R	G	G	G	G	G	G	R	G	G	R	G	G	G	G	G	G	R	G	R	R	G	G	G	G	G	G	G	G	G	G	G	G	G	G	G	G	G	R	R
S1D_91278592	G/A	1D	91278592	+	G	G	G	G	G	G	R	G	G	G	R	R	G	G	G	G	G	R	G	G	G	G	G	G	G	R	G	G	G	G	G	G	G	G	G	G	G	G	G	G	G	G	G	R	G
S1D_91278603	C/T	1D	91278603	+	C	C	C	C	C	C	C	C	C	C	C	C	Y	C	C	C	C	C	C	C	C	C	C	C	C	C	C	C	C	C	C	Y	C	C	C	C	C	C	C	C	C	C	C	Y	Y
S1D_91453280	C/G	1D	91453280	+	C	C	C	C	C	S	C	C	C	C	C	C	C	C	C	C	C	S	C	C	C	C	C	C	C	C	C	C	C	C	C	C	C	C	C	C	C	C	C	C	C	C	C	C	C
S1D_94298964	T/A	1D	94298964	+	W	T	T	T	T	T	T	T	W	T	T	T	T	T	T	T	T	T	T	T	T	W	T	W	W	T	T	T	T	T	T	T	T	T	T	W	W	T	T	A	T	T	W	T	T
S1D_94298985	C/A	1D	94298985	+	C	M	C	C	M	M	M	M	C	C	C	C	A	C	C	C	C	C	C	C	C	C	M	C	C	M	C	C	C	C	C	C	C	C	C	C	C	C	C	C	C	C	C	M	C
S1D_94298990	A/G	1D	94298990	+	A	R	A	A	A	A	A	A	A	A	A	A	A	A	A	A	A	A	A	A	A	A	A	A	R	A	A	A	A	A	A	A	A	A	A	A	A	A	A	A	A	A	A	A	A
S1D_94299005	G/A	1D	94299005	+	G	G	R	G	G	G	G	G	G	G	G	G	G	G	G	R	G	G	R	G	G	G	R	R	G	R	R	G	G	R	G	G	G	G	R	G	G	G	G	G	R	G	G	G	G
S1D_96264550	A/G	1D	96264550	+	A	A	A	A	A	A	A	A	A	A	A	A	A	A	A	A	A	A	A	A	R	A	A	A	A	A	A	A	A	R	A	A	A	A	A	A	A	R	A	A	A	A	R	A	A
S1D_96264554	T/C	1D	96264554	+	T	T	T	T	T	T	T	T	T	T	T	T	T	T	T	T	T	T	T	T	Y	T	T	T	T	T	T	T	T	Y	T	T	T	T	T	T	T	Y	T	T	T	T	Y	T	T
S1D_97008382	G/C	1D	97008382	+	G	G	G	S	G	G	G	G	G	G	G	G	G	G	G	G	S	G	G	G	G	G	G	S	G	G	G	G	G	G	G	G	G	S	S	G	G	G	G	G	G	G	G	G	S
S1D_97008388	C/G	1D	97008388	+	C	C	C	C	C	C	C	C	C	C	C	C	S	C	C	C	C	S	C	C	S	C	C	C	C	C	C	C	S	C	C	S	S	C	S	C	C	C	C	C	C	S	C	C	C
S1D_97008391	A/T	1D	97008391	+	W	A	A	A	A	W	A	A	A	A	A	A	A	A	A	A	A	A	A	W	A	A	A	A	A	A	A	A	A	A	A	W	W	A	A	W	A	A	A	W	A	A	A	A	A
S1D_97008404	C/T	1D	97008404	+	C	C	C	C	C	C	C	C	C	C	C	Y	C	C	C	C	C	C	C	C	C	C	C	C	C	C	C	C	C	C	C	C	C	C	C	Y	Y	C	C	C	Y	Y	C	C	C
S1D_97008406	A/G	1D	97008406	+	A	A	A	A	A	R	R	R	A	A	R	A	A	A	A	A	R	A	A	A	A	R	R	R	A	A	A	A	A	A	A	A	A	A	A	A	A	A	A	A	A	A	G	A	A
S1D_97008420	T/G	1D	97008420	+	T	T	T	T	T	T	T	T	K	K	T	T	T	T	T	K	T	T	T	T	T	T	T	T	T	K	T	T	T	T	T	T	T	T	T	K	T	T	T	T	K	T	T	T	T
S1D_97008422	C/G	1D	97008422	+	S	C	C	C	C	S	C	C	C	C	C	C	C	C	C	C	C	C	C	S	C	C	C	C	C	C	C	C	C	C	C	S	S	C	C	S	C	C	C	S	C	C	C	C	C
S1D_97856038	T/A	1D	97856038	+	T	T	T	T	W	W	T	T	W	T	W	T	T	T	T	T	W	T	T	T	T	T	T	T	T	T	T	T	W	T	T	W	T	W	T	T	T	T	T	T	T	T	W	T	T
S1D_99236039	C/A	1D	99236039	+	C	C	C	C	C	C	C	C	C	C	C	C	C	C	C	C	C	A	C	C	C	C	C	C	C	C	A	C	C	C	A	A	C	C	C	A	C	C	A	C	C	C	C	C	C
S1D_99958825	A/G	1D	99958825	+	A	R	A	A	A	A	R	R	A	A	A	A	A	A	A	A	A	A	A	A	A	A	A	A	A	R	A	A	A	A	A	A	A	A	A	A	A	A	A	A	R	R	A	R	A
S1D_100104396	G/A	1D	100104396	+	G	G	G	G	G	G	G	G	G	G	G	G	G	G	G	G	G	R	G	G	G	G	G	G	G	G	R	G	G	G	R	R	G	G	G	R	G	G	R	G	G	G	G	G	G
S1D_100324190	A/C	1D	100324190	+	A	M	A	A	A	A	A	A	A	A	A	A	M	A	A	A	A	A	A	M	A	A	A	A	A	A	A	M	M	A	A	A	A	C	A	A	A	A	M	M	A	M	A	C	M
S1D_100324205	C/A	1D	100324205	+	C	M	C	C	C	C	C	C	C	C	C	C	M	C	C	C	C	C	C	M	C	C	C	C	C	C	C	M	M	C	C	C	C	A	C	C	C	C	M	M	C	M	C	A	M
S1D_100324207	A/T	1D	100324207	+	A	A	A	A	A	A	A	A	A	A	A	A	A	W	A	W	A	A	A	A	A	T	A	W	A	W	A	A	A	A	A	A	A	A	A	A	A	A	A	A	T	A	A	A	A
S1D_100324209	G/T	1D	100324209	+	G	K	G	G	G	G	G	G	K	G	G	G	K	G	G	G	G	G	G	K	G	G	G	G	G	G	G	K	K	G	G	G	G	T	G	G	G	G	K	K	G	K	G	T	K
S1D_100359424	A/T	1D	100359424	+	A	A	A	A	A	A	A	A	A	A	A	A	A	A	A	A	A	A	A	A	W	A	T	A	A	A	A	A	A	A	A	A	W	A	A	A	A	A	A	A	A	A	A	A	A
S1D_100359427	C/T	1D	100359427	+	C	C	C	Y	C	C	C	C	C	C	Y	C	C	C	C	C	C	C	C	C	Y	Y	C	C	C	Y	C	Y	C	C	C	C	C	C	C	C	C	C	C	C	C	C	C	C	C
S1D_100359454	G/A	1D	100359454	+	G	G	G	G	G	R	G	G	G	G	G	G	G	G	G	R	G	G	G	G	R	G	A	G	G	G	G	G	G	G	G	G	R	G	G	G	G	G	G	R	G	G	G	G	R
S1D_100725931	T/C	1D	100725931	+	T	T	T	T	T	T	T	T	T	T	T	T	T	T	T	T	T	C	T	T	T	T	T	T	T	T	Y	T	T	T	Y	Y	T	T	T	Y	T	T	Y	T	T	T	T	T	T
S1D_101212233	C/T	1D	101212233	+	C	C	C	C	C	C	C	C	C	C	C	C	C	C	C	C	C	Y	C	C	C	C	C	C	C	C	Y	C	C	C	Y	Y	C	C	C	Y	C	C	Y	C	C	C	C	C	C
S1D_101787018	G/A	1D	101787018	+	R	G	G	G	G	G	G	G	G	G	G	G	G	G	G	G	G	G	G	R	G	G	G	R	G	G	G	G	G	G	G	R	G	G	G	G	R	R	G	G	G	G	G	G	G
S1D_101787023	G/A	1D	101787023	+	G	G	G	R	G	R	G	G	G	G	G	G	R	G	G	G	G	G	G	G	G	G	G	G	R	G	G	G	G	G	R	G	G	G	G	G	G	G	G	G	G	G	G	G	G
S1D_101787088	C/G	1D	101787088	+	C	C	C	S	C	C	C	C	C	C	C	G	C	C	C	C	C	C	C	C	C	C	C	C	S	C	C	C	C	C	C	C	C	C	C	C	C	C	C	S	C	C	C	C	C
S1D_101787098	C/T	1D	101787098	+	C	C	C	Y	C	C	C	C	C	C	C	T	C	C	C	C	C	C	C	C	C	C	C	C	Y	C	C	C	C	C	C	C	C	C	C	C	C	C	C	Y	C	C	C	C	C
S1D_102084350	G/T	1D	102084350	+	G	G	G	G	K	G	G	K	G	K	K	G	G	G	G	G	G	G	G	G	G	G	G	G	G	G	G	G	G	G	G	G	K	G	G	K	G	G	G	G	G	K	G	G	G
S1D_102084351	C/A	1D	102084351	+	C	C	C	C	M	C	C	M	C	M	M	C	C	C	C	C	C	C	C	C	C	C	C	C	C	C	C	C	C	C	C	C	M	C	C	M	C	C	C	C	C	M	C	C	C
S1D_102084361	C/A	1D	102084361	+	C	C	M	C	M	C	C	C	C	C	C	C	C	C	C	C	C	C	C	C	C	C	C	C	C	C	C	C	C	C	C	C	C	C	M	C	C	M	C	C	C	C	C	C	C
S1D_102277595	G/A	1D	102277595	+	G	G	G	R	G	G	R	G	G	R	G	G	G	G	R	G	G	G	G	G	G	G	G	G	G	G	G	G	G	G	G	G	G	G	R	R	G	R	G	G	G	G	G	G	G
S1D_102277598	C/A	1D	102277598	+	C	C	C	M	C	C	C	C	C	C	C	C	C	C	C	C	C	C	C	C	C	C	C	C	C	C	C	C	C	C	C	M	C	C	C	C	C	C	M	C	C	C	C	C	C
S1D_102277613	C/T	1D	102277613	+	C	C	C	C	C	C	C	C	C	C	C	C	C	C	C	C	C	C	C	C	C	C	Y	Y	C	C	C	C	C	C	C	Y	C	C	C	C	Y	C	C	C	C	C	C	C	C
S1D_102277614	A/G	1D	102277614	+	A	A	A	A	A	A	A	A	A	A	A	A	A	A	A	A	A	A	R	R	A	A	A	A	R	A	A	A	A	A	A	A	A	A	A	A	A	R	A	A	A	A	A	A	A
S1D_102277617	C/G	1D	102277617	+	C	C	C	C	C	C	C	C	C	C	C	C	C	C	C	C	C	C	S	S	C	C	C	C	S	C	C	C	C	C	C	C	C	C	C	C	C	S	C	C	C	C	C	C	C
S1D_102727443	A/G	1D	102727443	+	A	A	A	A	A	A	A	A	A	A	A	A	A	A	A	A	A	G	A	A	A	A	A	A	A	A	R	A	A	A	R	G	A	A	A	R	A	A	R	A	A	A	A	A	A
S1D_102806660	G/A	1D	102806660	+	G	G	G	G	G	A	G	G	G	G	G	G	G	G	G	G	G	G	G	G	G	G	G	G	G	G	G	G	G	G	G	G	G	G	G	G	G	G	G	G	G	G	G	G	G
S1D_103160005	T/G	1D	103160005	+	T	T	T	T	T	T	T	T	T	T	T	T	T	T	T	T	T	G	T	T	T	T	T	T	T	T	G	T	T	T	G	G	T	T	T	G	T	T	G	T	T	T	T	T	T
S1D_103580308	G/A	1D	103580308	+	G	R	G	G	G	G	G	R	G	G	R	G	G	G	G	G	G	G	G	G	G	G	G	G	R	G	G	R	R	G	G	G	G	G	G	G	G	G	G	G	G	G	G	G	R
S1D_103790770	G/A	1D	103790770	+	G	G	G	G	G	G	G	G	G	G	G	G	G	G	G	G	G	A	G	G	G	G	G	G	G	G	A	G	G	G	A	A	G	G	G	A	G	G	A	G	G	G	G	G	G
S1D_103790781	A/G	1D	103790781	+	A	A	A	A	A	A	A	A	A	A	A	A	A	A	R	R	A	G	A	A	R	A	A	A	A	A	G	A	A	A	G	G	A	A	A	G	A	A	G	A	A	A	A	A	A
S1D_105935706	G/C	1D	105935706	+	G	G	G	G	G	G	G	G	G	G	G	G	G	G	G	G	G	C	G	G	G	G	G	G	G	G	C	G	G	G	C	C	G	G	G	C	G	G	C	G	G	G	G	G	G
S1D_105935770	T/A	1D	105935770	+	T	T	T	T	T	T	T	T	T	T	T	T	T	T	T	T	T	A	T	T	T	T	T	T	T	T	A	T	T	T	A	A	T	T	T	A	T	T	A	T	T	T	T	T	T
S1D_106287900	T/C	1D	106287900	+	T	T	T	Y	T	T	Y	T	T	Y	T	T	T	T	T	T	T	T	T	T	T	T	T	Y	T	Y	T	T	T	T	T	T	T	T	T	T	T	T	T	T	T	T	T	T	T
S1D_106643278	G/A	1D	106643278	+	G	R	G	G	G	G	G	G	G	G	G	G	G	G	G	G	G	G	G	G	G	G	G	G	G	R	G	G	G	G	G	G	R	G	G	G	G	G	G	G	G	G	G	G	G
S1D_106643285	A/C	1D	106643285	+	A	M	A	A	A	A	A	A	A	A	A	A	A	A	A	A	A	A	A	A	A	A	A	A	A	M	A	A	A	A	A	A	M	A	A	A	A	A	A	A	A	A	A	A	A
S1D_106707139	G/A	1D	106707139	+	G	R	R	G	G	R	G	G	G	R	G	G	G	G	G	G	R	G	G	G	G	G	G	G	R	R	G	G	G	G	G	G	G	G	G	G	G	G	G	G	G	G	G	G	G
S1D_106769416	C/T	1D	106769416	+	C	C	C	C	C	C	C	C	C	C	C	C	C	C	C	C	C	T	C	C	C	C	C	C	C	C	T	C	C	C	T	T	C	C	C	T	C	C	T	C	C	C	C	C	C
S1D_107144332	G/T	1D	107144332	+	G	G	G	G	G	G	G	G	G	G	G	G	G	G	G	G	G	K	G	G	G	G	G	G	G	G	K	G	G	G	T	K	G	G	G	K	G	G	K	G	G	G	G	G	G
S1D_107726546	G/A	1D	107726546	+	G	G	G	G	G	R	G	G	G	G	G	G	G	G	G	G	R	R	G	G	G	G	G	G	G	G	R	G	G	G	G	G	G	G	G	G	G	G	G	G	G	G	G	G	G
S1D_107776165	A/C	1D	107776165	+	A	A	A	A	A	A	A	A	A	A	A	A	A	A	A	A	A	A	A	A	A	A	A	A	A	A	M	A	A	A	M	M	A	A	A	M	A	A	M	A	A	A	A	A	A
S1D_108387829	G/A	1D	108387829	+	G	G	G	G	G	A	G	G	G	G	G	G	G	G	G	G	G	G	G	G	G	G	G	G	G	G	G	G	G	G	G	G	G	G	G	G	G	G	G	G	G	G	G	G	G
S1D_108388340	T/G	1D	108388340	+	T	T	T	T	T	T	T	T	T	T	T	T	T	T	T	T	T	G	T	T	T	T	T	T	T	T	G	T	T	T	G	G	T	T	T	G	T	T	G	T	T	T	T	T	T
S1D_108662187	C/A	1D	108662187	+	C	C	C	C	C	C	C	C	C	C	C	C	C	C	C	C	C	A	C	C	C	C	C	C	C	C	A	C	C	C	A	M	C	C	C	M	C	C	M	C	C	C	C	C	C
S1D_108673629	C/A	1D	108673629	+	C	M	C	M	C	C	M	C	C	M	C	C	C	C	C	C	C	C	C	C	C	M	C	C	C	C	C	C	C	C	C	C	C	C	C	C	C	C	C	M	M	C	C	C	C
S1D_108673642	G/A	1D	108673642	+	R	G	G	G	G	G	G	R	R	G	G	G	G	G	G	G	G	G	R	G	G	G	G	R	G	G	G	G	G	G	G	G	G	G	R	G	G	G	G	G	G	G	G	G	G
S1D_108673648	A/C	1D	108673648	+	A	A	M	A	A	A	A	A	A	A	A	A	A	A	A	A	A	A	A	A	A	A	A	A	M	A	M	A	A	A	A	A	A	A	A	A	A	A	A	A	A	A	A	A	A
S1D_109497807	T/C	1D	109497807	+	T	T	T	T	T	T	T	T	T	T	T	T	T	Y	C	T	T	T	T	C	T	T	T	T	T	T	T	T	T	T	T	T	T	T	T	T	T	T	T	T	Y	T	T	T	T
S1D_109497826	C/T	1D	109497826	+	C	C	C	C	C	C	C	C	C	C	C	C	C	C	C	C	C	C	C	C	C	Y	C	C	Y	C	C	C	C	C	C	C	C	C	C	C	C	C	C	Y	Y	C	T	C	C
S1D_109498174	C/T	1D	109498174	+	C	C	C	C	C	C	C	C	C	C	C	C	C	Y	Y	Y	C	Y	C	C	C	C	C	C	C	C	Y	C	C	C	C	Y	C	C	C	C	C	C	C	Y	C	C	C	C	C
S1D_109498181	T/A	1D	109498181	+	T	T	T	T	W	T	T	T	T	T	A	W	T	W	T	T	T	T	W	T	T	T	W	T	T	T	T	T	T	T	T	T	T	T	T	T	T	T	T	T	T	T	T	T	T
S1D_109498202	A/T	1D	109498202	+	A	A	A	A	A	A	A	A	A	A	A	A	W	W	W	A	A	A	A	A	A	A	A	A	A	A	W	A	A	A	A	A	A	A	A	A	A	A	A	W	A	A	A	T	A
S1D_109498223	G/A	1D	109498223	+	G	G	G	G	R	G	G	G	G	G	A	R	G	R	G	G	G	G	R	G	G	G	R	G	G	G	G	G	G	G	G	G	G	G	G	G	G	G	G	G	G	G	G	G	G
S1D_109498224	G/C	1D	109498224	+	G	G	G	G	G	G	G	G	G	G	G	G	G	S	S	S	G	S	G	G	G	G	G	G	G	G	S	G	G	G	G	S	G	G	G	G	G	G	G	G	G	G	G	G	G
S1D_109623278	G/T	1D	109623278	+	G	G	G	G	G	G	G	G	G	G	G	G	G	G	G	G	G	G	G	G	G	G	G	G	G	G	G	G	G	K	G	G	G	K	G	G	G	G	G	G	G	G	G	G	G
S1D_109623280	T/G	1D	109623280	+	T	T	T	T	T	T	T	T	T	T	T	T	T	T	T	T	T	T	T	T	T	T	T	T	T	T	T	T	T	K	T	T	T	K	T	T	T	T	T	T	T	T	T	T	T
S1D_109623302	G/C	1D	109623302	+	G	G	S	G	G	G	G	S	G	G	G	G	G	G	G	G	G	G	G	G	G	G	G	G	G	S	G	G	G	G	G	G	G	G	G	G	G	G	G	G	G	G	G	G	S
S1D_109623315	C/T	1D	109623315	+	C	C	C	C	C	C	C	C	C	C	C	C	C	C	C	C	C	C	C	C	C	C	C	C	C	C	C	C	C	Y	C	C	C	Y	C	C	C	C	Y	Y	C	C	C	C	C
S1D_109623332	A/G	1D	109623332	+	R	A	A	A	A	A	A	A	R	A	A	A	A	A	A	A	A	A	A	R	A	A	A	A	R	A	R	A	A	R	A	R	R	R	R	A	A	A	A	A	A	A	A	R	A
S1D_109624685	T/C	1D	109624685	+	T	T	T	T	Y	T	Y	T	Y	Y	T	T	T	T	T	T	T	T	T	T	T	T	T	T	T	T	T	T	T	T	T	T	T	T	T	T	T	Y	T	T	T	T	T	T	T
S1D_109624703	A/G	1D	109624703	+	A	A	A	A	R	A	R	A	R	R	A	A	A	A	A	A	A	A	A	A	A	A	A	A	A	A	A	A	A	A	A	A	A	A	A	A	A	R	A	A	A	A	A	A	A
S1D_109687667	T/A	1D	109687667	+	T	T	T	T	T	W	T	T	T	T	T	T	T	T	T	W	T	T	T	T	T	T	T	W	T	T	T	T	T	T	T	T	T	T	W	T	T	T	T	T	T	T	T	W	T
S1D_109687688	A/T	1D	109687688	+	A	A	W	A	A	A	A	A	A	W	W	A	A	A	A	A	A	A	W	A	A	A	A	A	W	A	W	A	W	A	A	A	A	A	A	A	A	W	A	A	A	A	A	A	A
S1D_109687710	G/A	1D	109687710	+	G	G	G	G	R	R	G	A	G	G	G	G	G	G	G	R	G	G	G	G	G	G	G	R	R	R	R	G	G	A	R	R	A	G	G	G	G	G	G	G	G	R	G	G	G
S1D_110037020	C/T	1D	110037020	+	C	C	Y	C	Y	C	Y	C	C	C	C	C	Y	Y	C	C	C	C	C	C	C	C	C	C	Y	C	C	C	C	C	C	C	C	C	C	C	C	C	C	C	C	C	C	C	C
S1D_110037038	C/T	1D	110037038	+	C	C	Y	C	Y	C	Y	C	C	C	C	C	Y	Y	C	C	C	C	C	C	C	C	C	C	Y	C	C	C	C	C	C	C	C	C	C	C	C	C	C	C	C	C	C	C	C
S1D_110037041	C/T	1D	110037041	+	C	Y	C	C	Y	C	C	C	C	C	C	C	Y	C	C	C	Y	T	C	C	C	C	Y	C	C	C	C	C	C	C	Y	C	Y	Y	C	Y	C	C	C	C	C	C	C	C	C
S1D_110037057	G/C	1D	110037057	+	G	S	G	G	S	G	G	G	G	G	G	G	S	G	G	G	S	C	G	G	G	G	S	G	G	G	G	G	G	G	S	G	S	S	G	S	G	G	G	G	G	G	G	G	G
S1D_110266376	C/G	1D	110266376	+	C	S	C	C	C	C	C	C	S	C	C	C	C	C	C	C	C	C	C	C	C	C	S	S	C	C	C	S	C	C	C	C	C	C	S	C	S	S	C	C	C	C	C	C	C
S1D_110266383	A/C	1D	110266383	+	M	M	C	M	M	A	A	A	A	A	A	M	A	A	A	A	A	A	A	A	A	M	A	A	A	M	A	A	A	A	A	A	A	A	M	A	A	A	M	M	A	A	A	A	A
S1D_110266393	A/C	1D	110266393	+	A	A	A	A	M	A	A	A	A	A	A	A	A	A	A	A	A	A	A	A	A	A	A	A	M	A	A	A	A	A	A	A	A	A	A	A	A	A	A	A	A	A	A	A	M
S1D_110266395	A/G	1D	110266395	+	A	A	A	A	A	A	A	R	A	A	A	A	A	A	A	A	A	A	A	R	A	A	A	A	R	A	A	A	R	A	A	A	A	A	A	A	R	R	A	A	A	A	A	A	A
S1D_110266396	G/T	1D	110266396	+	G	G	G	G	G	G	G	G	G	T	G	G	G	G	G	G	G	G	G	G	G	G	K	K	G	G	G	K	G	G	G	G	G	G	G	K	G	G	K	G	G	G	G	G	G
S1D_110461868	T/A	1D	110461868	+	T	W	T	T	W	T	T	T	T	T	T	T	W	T	T	T	W	T	T	T	T	T	T	T	T	T	W	T	T	W	W	T	T	T	T	T	W	T	T	T	T	T	T	T	T
S1D_110461886	C/T	1D	110461886	+	C	C	Y	C	C	C	C	Y	C	C	C	C	C	C	C	C	C	C	C	C	C	C	Y	C	C	C	C	C	C	C	C	C	Y	C	C	Y	C	C	C	C	C	C	C	C	C
S1D_110461908	C/T	1D	110461908	+	C	Y	C	C	Y	C	C	C	C	C	C	C	C	C	Y	C	C	C	C	C	C	C	C	C	C	C	Y	C	C	Y	C	C	C	C	C	C	Y	C	C	C	C	C	C	C	C
S1D_110461911	G/A	1D	110461911	+	G	G	G	G	G	G	G	G	G	G	G	R	G	G	G	R	G	G	G	G	G	G	G	G	R	G	G	G	G	G	R	G	G	G	G	G	G	R	G	G	G	G	G	G	G
S1D_111116768	C/G	1D	111116768	+	C	C	C	C	C	C	C	C	C	C	C	C	C	S	C	C	C	C	C	C	C	C	C	C	C	C	S	C	C	C	C	S	C	C	C	C	C	C	S	C	C	C	C	C	C
S1D_111249345	G/A	1D	111249345	+	G	G	G	G	G	G	G	G	G	G	G	G	G	G	G	G	G	R	G	G	G	G	G	G	G	G	A	G	G	G	A	A	G	G	G	A	G	G	A	G	G	G	G	G	G
S1D_111934084	A/T	1D	111934084	+	A	A	A	A	A	A	A	A	A	A	A	A	A	A	A	A	A	T	A	A	A	A	A	A	A	A	A	A	A	A	W	W	A	A	A	W	A	A	W	A	A	A	A	A	A
S1D_111936038	A/C	1D	111936038	+	A	A	A	M	A	A	A	A	M	A	A	A	A	A	M	A	A	A	A	A	A	A	A	A	A	M	M	A	A	A	M	A	A	A	A	A	A	A	M	A	M	A	A	A	A
S1D_111936043	C/T	1D	111936043	+	C	C	C	Y	C	C	C	C	Y	C	C	C	C	C	Y	C	C	C	C	C	C	C	C	C	C	Y	Y	C	C	C	Y	C	C	C	C	C	C	C	Y	C	Y	C	C	C	C
S1D_112417514	C/G	1D	112417514	+	C	C	C	C	C	C	C	C	C	C	C	C	C	C	C	C	C	G	C	C	C	C	C	C	C	C	G	C	C	C	G	G	C	C	C	G	C	C	G	C	C	C	G	C	C
S1D_112417515	A/C	1D	112417515	+	A	A	A	A	A	C	C	A	A	A	A	A	A	A	A	A	A	C	A	A	A	A	A	C	A	A	C	A	A	A	C	C	A	A	A	C	A	A	C	A	A	A	C	A	A
S1D_114033380	G/A	1D	114033380	+	G	A	G	G	R	R	G	G	R	G	G	G	G	G	G	G	G	G	G	G	G	G	G	G	G	G	G	G	G	G	A	R	G	G	G	G	G	G	R	G	A	G	G	R	A
S1D_114033381	G/T	1D	114033381	+	G	T	G	G	K	K	G	G	G	G	G	G	G	G	G	G	G	G	G	G	G	G	G	G	G	G	G	G	G	G	T	K	G	G	G	G	G	G	K	G	T	G	G	K	T
S1D_114096684	G/A	1D	114096684	+	G	G	G	G	A	G	G	G	G	G	G	G	G	G	G	G	G	G	A	G	G	G	A	A	A	G	G	G	G	G	G	G	G	G	G	G	G	G	G	G	G	G	G	G	G
S1D_114096748	A/G	1D	114096748	+	A	A	A	A	A	A	A	A	A	A	A	A	A	A	A	A	A	G	A	A	A	A	A	A	A	A	R	A	A	A	R	R	A	A	A	R	A	A	R	A	A	A	A	A	A
S1D_114179543	T/G	1D	114179543	+	T	T	T	K	G	K	T	T	K	T	T	T	T	T	T	T	T	T	T	T	T	T	T	T	K	T	T	T	T	T	T	T	T	T	G	T	T	T	T	K	T	T	K	T	T
S1D_114179571	A/T	1D	114179571	+	W	A	A	A	A	W	T	W	A	A	A	A	A	A	A	A	A	A	W	A	T	A	A	A	A	A	A	A	A	A	A	A	A	A	A	A	A	A	A	W	A	A	A	A	A
S1D_114179583	C/G	1D	114179583	+	C	C	C	S	G	S	C	C	S	C	C	C	C	C	C	C	C	C	C	C	C	C	C	C	S	C	C	C	C	C	C	C	C	C	G	C	C	C	C	S	C	C	S	C	C
S1D_114179593	C/T	1D	114179593	+	C	C	C	C	C	Y	C	C	C	C	C	C	C	C	C	C	C	C	C	C	C	C	Y	C	Y	C	C	Y	Y	C	C	C	C	C	C	C	C	C	C	C	Y	C	C	C	C
S1D_114187948	A/G	1D	114187948	+	A	A	A	A	R	A	A	A	A	A	A	A	A	A	A	A	A	A	A	A	A	A	A	R	R	A	A	R	A	A	A	A	A	A	A	A	A	A	A	A	A	A	A	A	A
S1D_114327472	G/A	1D	114327472	+	G	G	G	G	G	G	G	G	G	G	G	G	G	G	G	G	G	R	G	G	G	G	G	G	G	G	G	G	G	G	R	G	G	G	G	G	G	G	R	G	G	G	G	G	G
S1D_114327771	T/C	1D	114327771	+	T	T	T	T	T	C	C	T	T	T	T	T	T	T	T	T	T	C	T	T	T	T	T	C	T	T	C	T	T	T	C	C	T	T	T	C	T	T	C	T	T	T	T	T	T
S1D_114328802	C/T	1D	114328802	+	C	C	C	C	C	C	C	C	C	C	C	C	C	C	C	C	C	Y	C	C	C	C	C	C	C	C	C	C	C	C	Y	C	C	C	C	T	C	C	Y	C	C	C	C	C	C
S1D_115113569	G/A	1D	115113569	+	G	G	G	G	G	G	G	G	G	G	G	G	G	G	G	G	G	R	G	G	G	G	G	G	G	G	G	G	G	G	R	G	G	G	G	G	G	G	G	G	G	G	R	G	G
S1D_115113572	C/T	1D	115113572	+	C	Y	C	C	C	C	C	C	Y	C	C	Y	C	Y	C	C	C	C	C	C	C	Y	C	C	C	C	C	Y	C	Y	C	C	C	C	Y	C	C	C	C	C	C	C	C	C	C
S1D_115113590	G/A	1D	115113590	+	G	R	G	G	G	G	G	G	R	G	G	R	G	R	G	G	G	G	G	G	G	R	G	G	G	G	G	R	G	R	G	G	G	G	R	G	G	G	G	G	G	G	G	G	G
S1D_115922543	C/T	1D	115922543	+	C	C	C	C	T	Y	C	C	C	Y	C	Y	Y	C	C	C	C	C	C	C	C	C	C	C	C	C	C	C	C	C	C	C	C	C	C	C	C	C	Y	C	C	C	C	C	C
S1D_115922547	C/T	1D	115922547	+	C	Y	C	C	C	C	C	T	C	C	C	C	C	C	C	C	C	C	T	C	Y	C	Y	C	C	C	C	C	C	C	C	Y	C	C	C	C	C	C	C	C	C	C	C	C	C
S1D_115922565	A/G	1D	115922565	+	G	A	A	A	A	A	A	A	A	A	A	A	A	A	A	A	A	A	A	A	R	A	A	A	A	A	A	A	A	A	R	A	A	A	A	A	A	G	A	A	A	A	A	A	A
S1D_115922587	G/T	1D	115922587	+	G	G	G	G	T	K	G	G	G	K	G	K	K	G	G	G	G	G	G	G	G	G	G	G	G	G	G	G	G	G	G	G	G	G	G	G	G	G	K	G	G	G	G	G	G
S1D_116212796	T/C	1D	116212796	+	T	T	T	T	T	T	T	T	T	Y	Y	T	T	Y	T	T	T	T	Y	T	Y	T	T	T	T	T	T	T	T	T	T	T	T	T	T	T	T	Y	T	T	T	T	T	T	T
S1D_116212798	G/A	1D	116212798	+	G	G	G	G	G	G	G	G	G	G	G	R	G	G	G	G	G	G	G	R	G	G	G	R	G	G	G	G	G	G	G	G	G	G	G	G	R	G	G	G	G	G	G	G	R
S1D_116212816	G/T	1D	116212816	+	G	G	G	G	G	G	G	G	G	G	G	K	G	G	G	G	G	G	G	K	G	G	G	K	G	G	G	G	G	G	G	G	G	G	G	G	K	G	G	G	G	G	G	G	G
S1D_116212830	G/A	1D	116212830	+	G	G	G	G	G	G	G	G	G	G	G	G	G	R	R	G	R	G	R	G	G	R	G	G	G	R	G	G	G	G	G	G	G	G	G	G	G	G	G	G	G	G	G	G	G
S1D_116212832	G/A	1D	116212832	+	G	G	G	G	G	G	G	G	G	G	G	R	G	G	G	G	G	G	G	R	G	G	G	R	G	G	G	G	G	G	G	G	G	G	G	G	R	G	G	G	G	G	G	G	R
S1D_116212844	G/A	1D	116212844	+	G	G	R	G	G	G	G	A	G	G	G	G	G	G	G	R	G	G	G	G	G	G	G	G	G	G	G	A	G	G	G	G	G	G	G	G	G	R	G	G	G	G	G	G	G
S1D_116212851	G/T	1D	116212851	+	G	G	G	G	G	G	G	G	G	K	K	G	G	K	G	G	G	G	K	G	K	G	G	G	G	G	G	G	G	G	G	G	G	G	G	G	G	K	G	G	G	G	G	G	G
S1D_116386213	C/G	1D	116386213	+	C	C	C	C	C	C	S	S	C	C	C	C	S	C	C	C	C	C	C	C	C	C	C	C	C	C	S	C	C	C	C	S	C	S	C	C	C	C	C	C	C	C	C	C	C
S1D_116838148	C/T	1D	116838148	+	C	C	C	C	C	C	C	C	C	C	C	C	C	C	Y	Y	C	C	C	C	C	T	C	C	C	C	T	T	Y	C	C	C	C	C	C	C	C	C	C	C	C	C	C	C	C
S1D_116838172	G/A	1D	116838172	+	G	G	G	G	G	G	G	G	G	G	G	G	G	G	R	R	G	G	G	G	G	A	G	G	G	G	A	A	R	G	G	G	G	G	G	G	G	G	G	G	G	G	G	G	G
S1D_118088842	A/G	1D	118088842	+	A	A	A	A	A	A	A	A	A	A	A	A	A	A	A	A	A	G	A	R	A	A	A	A	A	A	G	A	A	A	G	G	A	A	A	G	A	A	G	A	A	A	A	A	A
S1D_118088909	C/T	1D	118088909	+	C	C	C	C	C	C	C	C	C	C	C	C	C	C	C	C	C	T	C	C	C	C	C	C	C	C	Y	C	C	C	T	T	C	C	C	C	C	C	T	C	C	C	C	C	C
S1D_118682440	C/T	1D	118682440	+	Y	C	C	C	C	C	C	Y	Y	Y	C	C	C	C	C	C	Y	C	C	C	C	Y	Y	Y	C	C	C	C	C	C	C	Y	C	C	C	Y	C	C	C	C	C	Y	Y	C	C
S1D_118682449	C/T	1D	118682449	+	C	T	C	C	C	C	Y	C	C	C	C	C	C	C	Y	C	C	C	C	C	C	C	Y	C	C	C	C	C	C	C	C	C	C	C	C	C	C	Y	C	C	C	C	Y	C	C
S1D_118683930	A/G	1D	118683930	+	G	A	A	A	A	A	A	A	A	A	A	A	R	A	R	G	A	A	R	A	A	A	A	A	A	A	A	G	A	A	A	A	A	A	A	A	A	A	A	R	A	R	R	R	A
S1D_118683931	G/C	1D	118683931	+	G	G	G	G	G	G	S	G	G	G	S	G	G	G	G	G	G	G	G	G	G	G	G	G	G	G	G	G	G	G	S	S	G	G	G	G	G	S	G	G	G	G	G	G	G
S1D_119605150	C/T	1D	119605150	+	C	C	Y	Y	C	C	C	C	C	C	Y	C	C	C	C	Y	C	C	C	C	C	C	C	C	C	Y	C	C	C	C	C	C	C	C	C	C	C	C	C	Y	C	C	C	C	C
S1D_119605159	C/T	1D	119605159	+	C	C	Y	Y	C	C	C	C	C	C	Y	C	C	C	C	Y	C	C	C	C	C	C	C	C	C	Y	C	C	C	C	C	C	C	C	C	C	C	C	C	Y	C	C	C	C	C
S1D_119605173	C/T	1D	119605173	+	C	Y	C	Y	Y	C	Y	Y	C	C	C	C	C	C	C	C	C	C	C	C	C	C	C	C	Y	Y	C	C	C	C	Y	C	C	C	C	C	C	T	C	C	C	C	C	C	C
S1D_121360694	T/G	1D	121360694	+	T	T	T	T	T	T	T	T	T	T	T	T	T	T	T	T	T	G	T	T	T	T	T	T	T	T	K	T	T	T	K	K	T	T	T	K	T	T	K	T	T	T	T	T	T
S1D_122241631	G/A	1D	122241631	+	G	G	G	G	G	R	G	G	G	G	G	G	R	G	G	G	G	G	G	G	G	G	G	R	G	G	G	G	G	G	G	G	G	G	G	G	R	G	G	G	G	G	G	G	G
S1D_122241642	C/T	1D	122241642	+	C	C	C	C	C	C	C	C	C	C	C	C	C	C	C	T	Y	C	C	C	C	Y	Y	C	C	Y	Y	C	C	Y	C	C	Y	C	T	C	C	C	C	Y	Y	C	C	C	C
S1D_122241647	G/A	1D	122241647	+	G	G	G	G	G	G	G	G	G	G	G	G	G	G	G	G	G	G	G	G	G	G	G	R	R	G	R	G	G	G	G	G	G	G	G	G	G	G	G	R	G	G	G	G	G
S1D_122241653	C/G	1D	122241653	+	C	S	C	C	G	S	C	C	C	C	C	C	C	C	C	C	C	C	C	C	C	C	C	C	C	C	C	C	C	C	C	G	C	C	C	C	C	C	C	C	C	S	C	C	C
S1D_122241655	C/A	1D	122241655	+	C	C	C	A	C	C	C	C	C	C	C	C	C	C	C	C	C	A	C	C	C	C	C	M	C	C	C	C	C	C	C	C	C	C	C	C	C	C	C	C	C	C	C	C	C
S1D_122241668	C/T	1D	122241668	+	C	Y	C	C	T	Y	C	C	C	C	C	C	C	C	C	C	C	C	C	C	C	C	C	C	C	C	C	C	C	C	C	T	C	C	C	C	C	C	C	C	C	Y	C	C	C
S1D_122241670	G/A	1D	122241670	+	G	G	G	A	G	G	G	G	G	G	G	G	G	G	G	G	G	A	G	G	G	G	G	R	G	G	G	G	G	G	G	G	G	G	G	G	G	G	G	G	G	G	G	G	G
S1D_122241683	T/C	1D	122241683	+	T	T	T	C	T	T	T	T	T	T	T	T	T	T	T	T	T	C	T	T	T	T	T	Y	T	T	T	T	T	T	T	T	T	T	T	T	T	T	T	T	T	T	T	T	T
S1D_122788714	T/A	1D	122788714	+	T	T	T	T	T	T	T	T	T	T	T	T	T	T	T	T	T	A	T	T	T	T	T	T	T	T	A	T	T	T	A	A	T	T	T	A	T	T	A	T	T	T	T	T	T
S1D_122788715	C/T	1D	122788715	+	C	C	C	C	C	C	C	C	C	C	C	C	C	C	C	C	C	T	C	C	C	C	C	C	C	C	T	C	C	C	T	T	C	C	C	T	C	C	T	C	C	C	C	C	C
S1D_122829914	T/C	1D	122829914	+	T	T	T	T	T	T	C	T	T	T	T	T	T	T	T	T	T	T	T	T	T	T	T	C	T	T	T	T	T	T	T	T	T	T	T	T	T	T	T	T	T	T	T	T	T
S1D_122840249	C/T	1D	122840249	+	C	C	C	C	C	C	C	C	C	C	C	C	C	C	C	C	C	T	C	C	C	C	C	C	C	C	Y	C	C	C	Y	T	C	C	C	Y	C	C	Y	C	C	C	C	C	C
S1D_123045850	G/A	1D	123045850	+	G	G	G	G	A	G	G	G	G	G	G	G	G	G	G	G	G	G	G	G	G	G	G	G	G	R	G	G	G	G	G	G	G	G	R	G	G	G	A	G	G	G	G	G	G
S1D_123045852	C/A	1D	123045852	+	M	C	M	C	C	C	M	C	C	C	M	C	C	C	C	M	C	M	C	C	C	M	C	C	C	C	C	M	C	C	C	C	C	C	C	C	C	C	C	C	C	C	C	C	C
S1D_123045870	C/T	1D	123045870	+	C	C	C	C	T	C	C	C	C	C	C	C	C	C	C	C	C	C	C	C	C	C	C	C	C	Y	C	C	C	C	C	C	C	C	C	C	C	C	T	C	C	C	C	C	C
S1D_124118339	A/G	1D	124118339	+	A	A	A	A	A	A	A	A	A	A	A	A	A	A	A	A	A	A	A	A	A	A	A	A	A	A	A	A	A	A	R	R	A	A	A	R	A	A	R	A	A	A	A	A	A
S1D_124449873	C/A	1D	124449873	+	M	C	C	C	C	C	C	C	C	C	C	C	C	C	C	C	C	C	C	C	M	C	C	C	C	C	C	C	C	M	C	C	C	C	C	C	C	M	C	M	C	M	C	M	C
S1D_124449878	C/T	1D	124449878	+	C	C	C	C	C	C	C	C	C	C	C	C	C	C	C	C	C	Y	C	C	C	C	C	C	C	C	Y	C	C	C	Y	Y	C	C	C	Y	C	C	Y	C	C	C	C	C	C
S1D_124710113	C/T	1D	124710113	+	C	C	C	C	C	C	C	C	C	C	C	C	C	C	C	C	C	T	C	C	C	C	C	C	C	C	T	C	C	C	T	T	C	C	C	T	C	C	T	C	C	C	C	C	C
S1D_125090738	A/C	1D	125090738	+	C	C	A	A	C	C	A	A	A	C	A	C	C	A	C	C	C	C	C	A	C	A	A	A	A	C	A	A	A	A	A	A	C	A	A	C	A	A	A	C	A	C	C	C	A
S1D_125091014	C/G	1D	125091014	+	C	C	C	C	C	C	C	C	C	C	C	S	C	C	C	C	C	C	C	C	C	S	S	C	C	S	C	C	C	C	C	C	S	C	G	C	C	S	C	C	C	C	C	C	C
S1D_125416185	C/T	1D	125416185	+	C	C	C	C	C	C	C	C	C	C	C	C	C	C	C	C	C	Y	C	C	C	C	C	C	C	C	Y	C	C	C	Y	Y	C	C	C	Y	C	C	Y	C	C	C	C	C	C
S1D_125422760	C/A	1D	125422760	+	C	C	C	C	C	C	C	C	C	C	C	C	C	C	C	C	C	A	C	C	C	C	C	C	C	C	A	C	C	C	A	A	C	C	C	A	C	C	A	C	C	C	C	C	C
S1D_126560308	T/C	1D	126560308	+	T	T	T	T	Y	C	Y	Y	T	T	Y	T	T	T	T	T	T	T	T	T	T	Y	T	T	T	T	T	T	T	T	Y	T	T	T	T	T	T	T	T	Y	T	T	T	T	T
S1D_126560311	G/A	1D	126560311	+	G	G	G	A	G	G	G	G	G	G	G	G	G	G	G	R	G	R	G	G	G	G	R	G	G	G	G	G	G	G	G	G	G	G	G	G	G	G	G	G	G	G	G	G	G
S1D_126560312	C/T	1D	126560312	+	C	C	C	C	Y	C	Y	C	Y	C	C	C	C	C	C	C	C	C	C	C	C	Y	C	C	C	C	C	C	C	C	Y	C	C	C	C	C	C	Y	C	Y	C	C	C	C	C
S1D_126560316	C/A	1D	126560316	+	C	C	C	C	C	C	C	C	C	C	C	C	C	C	C	C	C	C	C	C	M	C	C	C	C	C	C	C	C	C	C	C	C	C	C	C	C	C	C	C	C	C	C	C	C
S1D_126560329	T/C	1D	126560329	+	T	T	T	T	Y	T	Y	T	T	T	T	T	T	T	T	T	T	T	T	T	T	Y	T	T	T	T	T	T	T	T	Y	T	T	T	T	T	T	T	T	Y	T	T	T	T	T
S1D_126560339	T/C	1D	126560339	+	T	T	T	T	T	T	T	T	T	T	T	T	T	T	T	Y	T	Y	T	T	T	T	Y	T	T	T	T	T	T	T	T	T	T	T	T	T	T	T	T	T	T	T	T	T	T
S1D_126560357	T/C	1D	126560357	+	Y	T	T	T	T	T	T	T	T	T	T	T	T	T	C	T	Y	T	T	Y	T	T	T	T	T	Y	T	Y	T	T	T	T	T	T	T	T	T	T	T	T	T	T	T	T	T
S1D_126780271	C/T	1D	126780271	+	C	C	C	Y	C	C	Y	C	C	C	C	C	C	Y	C	C	C	Y	Y	Y	C	C	Y	C	Y	Y	C	C	C	C	C	C	C	C	C	C	C	C	C	C	C	T	C	C	C
S1D_126780286	G/T	1D	126780286	+	G	G	G	K	K	K	G	G	G	G	K	G	G	G	G	G	K	G	G	G	K	G	G	K	G	G	T	G	G	G	G	G	G	G	G	G	G	G	G	G	G	G	G	G	G
S1D_126780293	T/G	1D	126780293	+	T	T	T	T	T	K	T	T	K	T	T	T	T	T	T	K	T	T	T	T	T	K	T	T	T	T	T	K	T	T	T	T	T	T	K	G	T	T	T	T	T	T	T	T	T
S1D_126789494	T/A	1D	126789494	+	T	T	T	T	T	T	T	T	T	T	T	T	T	T	W	T	T	T	T	T	T	T	T	T	T	T	T	W	T	W	T	T	T	T	T	T	T	T	T	T	T	T	T	T	T
S1D_127198769	T/G	1D	127198769	+	T	T	T	T	T	T	K	T	T	T	K	T	T	T	K	T	K	T	T	T	T	T	T	T	T	T	K	T	T	T	T	T	T	T	T	T	T	T	T	T	T	T	T	T	T
S1D_127198793	T/C	1D	127198793	+	T	T	T	T	T	T	T	T	Y	T	T	T	T	T	T	T	T	T	T	Y	T	T	T	C	T	Y	Y	T	T	T	T	Y	T	T	T	T	Y	T	T	T	T	T	T	T	Y
S1D_127198805	G/A	1D	127198805	+	G	G	G	R	G	A	G	R	G	G	G	A	G	G	G	G	G	G	G	G	R	G	G	G	G	G	G	G	G	G	G	G	G	A	A	G	G	G	A	G	G	G	G	G	R
S1D_127198808	A/T	1D	127198808	+	A	A	W	W	A	A	A	A	A	A	W	A	A	W	A	A	A	A	A	A	A	A	A	A	A	A	A	A	W	W	A	W	A	A	A	A	A	A	A	A	A	A	A	A	A
S1D_127198812	G/T	1D	127198812	+	G	G	G	G	G	G	G	G	G	G	G	G	G	G	G	G	G	G	T	G	G	G	G	G	G	G	G	G	G	G	K	G	G	G	G	G	G	G	G	G	G	T	G	G	G
S1D_127512761	G/A	1D	127512761	+	G	G	R	G	R	G	A	R	G	R	G	G	G	G	G	G	G	G	R	G	G	G	G	A	R	G	G	R	G	G	G	G	G	G	R	A	G	G	G	A	G	G	G	G	G
S1D_127512767	T/C	1D	127512767	+	T	T	Y	T	Y	T	C	Y	T	Y	T	T	T	T	T	T	T	T	Y	T	T	T	T	C	Y	T	T	Y	T	T	T	T	T	T	Y	C	T	T	T	C	T	T	T	T	T
S1D_127807544	C/A	1D	127807544	+	C	C	C	C	C	C	C	M	C	M	C	C	C	C	M	C	C	C	C	C	C	C	C	C	C	C	C	C	C	C	C	C	C	C	C	C	C	C	C	C	C	C	C	C	C
S1D_127807558	T/C	1D	127807558	+	T	T	T	T	T	T	T	Y	T	Y	T	T	T	T	Y	T	T	T	T	T	T	T	T	T	T	T	T	T	T	T	T	T	T	T	T	T	T	T	T	T	T	T	T	T	T
S1D_127807560	C/A	1D	127807560	+	C	M	C	M	C	C	C	C	C	C	C	C	C	C	M	C	C	C	C	M	C	M	C	C	C	C	C	C	C	C	C	M	C	C	C	C	C	C	C	C	C	C	C	C	C
S1D_127807568	C/T	1D	127807568	+	C	Y	C	Y	C	C	C	C	C	C	C	C	C	C	Y	C	C	C	C	Y	C	Y	C	C	C	C	C	C	C	C	C	Y	C	C	C	C	C	C	C	C	C	C	C	C	C
S1D_128173634	G/A	1D	128173634	+	G	R	G	G	G	G	G	G	G	G	G	G	G	G	G	G	G	G	R	G	R	G	G	G	G	G	G	G	G	G	G	G	G	G	G	G	G	G	G	G	G	G	G	G	G
S1D_128173666	G/A	1D	128173666	+	G	R	G	G	G	G	G	G	G	G	G	G	G	G	G	G	G	G	R	G	R	G	G	G	G	G	G	G	G	G	G	G	G	G	G	G	G	G	G	G	G	G	G	G	G
S1D_128173689	C/A	1D	128173689	+	C	C	C	C	C	C	C	C	M	C	C	C	C	C	C	C	C	C	M	C	C	C	C	C	C	C	C	C	C	C	C	C	C	C	C	M	C	C	C	C	M	C	C	C	A
S1D_128173690	C/G	1D	128173690	+	C	C	C	C	C	C	C	C	S	C	C	C	C	C	C	C	C	C	S	C	C	C	C	C	C	C	C	C	C	C	C	C	C	C	C	S	C	C	C	C	S	C	C	C	G
S1D_129211221	C/A	1D	129211221	+	C	C	M	C	M	C	C	C	C	C	C	C	C	C	C	C	C	C	C	C	C	C	C	M	M	C	M	C	C	M	C	C	C	C	M	M	C	M	C	C	C	C	C	C	C
S1D_129211226	A/T	1D	129211226	+	A	A	W	A	A	A	A	A	A	A	A	A	A	A	A	A	A	A	A	A	A	A	A	W	W	A	W	A	A	W	A	A	A	A	W	W	A	W	A	A	A	A	A	A	A
S1D_129211232	C/T	1D	129211232	+	C	C	C	C	C	C	C	C	C	C	C	C	C	C	C	C	Y	C	C	C	Y	C	Y	Y	C	C	C	C	C	C	C	C	C	C	C	C	C	C	C	Y	C	C	Y	C	C
S1D_129211253	G/A	1D	129211253	+	G	G	R	G	G	G	G	G	G	G	G	G	G	G	G	G	G	G	G	G	G	G	G	R	R	G	R	G	G	R	G	G	G	G	R	R	G	R	G	G	G	G	G	G	G
S1D_129213405	C/T	1D	129213405	+	C	C	C	C	C	C	C	C	C	C	C	C	C	C	C	C	C	T	C	C	C	C	C	C	C	C	T	C	C	C	T	T	C	C	C	T	C	C	T	C	C	C	C	C	C
S1D_129213798	C/T	1D	129213798	+	C	C	C	C	C	C	C	C	C	C	C	C	C	C	C	C	C	Y	C	C	C	C	C	C	C	C	Y	C	C	C	Y	Y	C	C	C	Y	C	C	Y	C	C	C	C	C	C
S1D_130942400	A/G	1D	130942400	+	A	A	A	A	G	A	A	R	A	A	A	A	A	A	A	A	A	R	A	A	A	A	A	A	A	A	A	A	A	A	A	A	A	A	A	R	A	A	A	A	A	A	A	A	A
S1D_130942422	C/T	1D	130942422	+	C	C	C	Y	C	C	C	C	C	C	C	C	C	Y	C	C	C	C	C	C	C	Y	Y	C	C	C	C	C	C	C	C	Y	C	C	C	Y	C	C	C	C	C	C	C	C	C
S1D_130942450	T/C	1D	130942450	+	T	Y	T	T	T	T	T	T	T	T	T	T	T	T	T	T	T	T	T	Y	T	T	T	T	T	T	C	T	T	T	T	T	T	T	T	Y	T	T	Y	T	T	Y	T	T	Y
S1D_130942451	G/T	1D	130942451	+	G	G	G	G	G	G	G	G	K	G	G	G	G	G	G	G	G	K	G	G	G	G	K	K	G	G	G	G	G	G	G	G	K	G	K	G	G	G	G	G	G	G	G	G	G
S1D_131154235	T/C	1D	131154235	+	T	Y	T	T	T	T	T	T	T	T	T	T	T	T	T	T	T	T	T	T	T	Y	T	T	T	T	T	T	T	T	T	T	T	T	T	T	T	T	T	T	T	T	T	T	T
S1D_131154243	C/G	1D	131154243	+	C	C	C	C	C	C	C	C	S	S	C	C	C	C	C	C	C	C	C	C	C	C	C	C	C	C	C	C	C	C	C	C	C	C	C	C	G	C	C	C	C	C	C	C	C
S1D_131154249	C/T	1D	131154249	+	Y	C	C	C	C	C	C	C	C	C	C	C	C	C	Y	C	C	C	C	C	C	Y	C	C	C	C	C	C	C	C	C	C	C	C	C	C	C	Y	C	C	C	C	C	C	C
S1D_131154256	C/T	1D	131154256	+	C	C	C	C	C	C	C	C	C	C	C	C	C	C	C	T	C	C	Y	C	C	C	C	Y	Y	C	C	C	C	C	C	C	C	Y	C	C	C	C	C	C	C	Y	C	C	C
S1D_131163621	T/A	1D	131163621	+	T	T	T	A	T	T	T	T	T	T	W	T	W	T	T	T	T	T	T	W	T	T	T	T	W	T	T	W	T	T	T	W	T	T	T	T	T	T	T	T	T	T	T	T	T
S1D_131163626	C/T	1D	131163626	+	C	C	C	C	C	C	C	C	C	C	C	C	C	C	C	C	C	C	C	C	C	C	C	C	C	C	C	C	Y	Y	C	C	C	C	C	Y	C	C	C	C	C	Y	C	C	C
S1D_131163642	G/A	1D	131163642	+	G	G	G	G	G	G	G	G	G	G	R	G	G	G	G	G	G	G	G	G	G	R	G	G	G	G	G	G	G	G	G	G	G	G	G	G	G	G	G	G	G	R	R	G	G
S1D_131163649	A/T	1D	131163649	+	A	A	A	T	A	A	A	A	A	A	W	A	W	A	A	A	A	A	A	W	A	A	A	A	W	A	A	W	A	A	A	W	A	A	A	A	A	A	A	A	A	A	A	A	A
S1D_131163652	T/G	1D	131163652	+	T	T	T	T	T	T	T	T	G	K	T	T	K	T	T	T	T	G	T	K	T	T	T	T	T	T	T	T	T	T	T	T	T	T	T	T	T	T	T	T	T	T	T	T	T
S1D_131163658	G/A	1D	131163658	+	G	G	G	G	R	R	R	G	G	G	G	G	G	G	G	A	G	G	G	G	G	R	G	G	G	G	G	G	G	G	A	G	G	R	G	G	R	G	G	G	G	R	G	G	G
S1D_131553474	C/G	1D	131553474	+	C	C	C	C	S	C	C	C	C	C	C	C	C	C	G	C	C	C	C	C	C	C	S	C	C	C	C	C	C	S	C	C	C	C	C	C	S	C	C	C	C	C	C	C	C
S1D_131801018	A/T	1D	131801018	+	A	A	A	A	A	A	A	A	A	A	A	A	A	A	A	A	A	A	A	A	A	A	A	A	A	A	W	A	A	A	A	A	A	A	A	A	A	A	A	A	A	A	A	A	A
S1D_131801047	G/C	1D	131801047	+	G	G	G	G	G	G	G	G	G	G	G	G	G	G	G	G	G	G	G	G	G	G	G	G	G	G	S	G	G	G	G	G	G	G	G	G	G	G	G	G	G	G	G	G	G
S1D_133093044	G/A	1D	133093044	+	G	G	G	G	G	G	G	G	R	G	G	G	G	G	G	G	G	G	G	G	G	G	G	G	G	G	R	G	G	G	R	R	G	G	G	G	G	G	R	G	G	G	G	G	G
S1D_134739562	G/A	1D	134739562	+	G	G	G	G	G	G	G	G	G	G	G	G	G	G	G	G	G	G	G	G	G	G	G	G	G	G	R	G	G	G	R	G	G	R	G	G	G	G	G	G	G	R	G	R	G
S1D_134739572	A/T	1D	134739572	+	A	A	A	A	A	A	W	A	A	A	A	A	T	A	A	A	W	A	A	A	A	W	A	A	A	A	W	A	A	A	A	W	A	A	A	A	A	A	A	A	A	A	A	A	T
S1D_134739580	G/A	1D	134739580	+	R	G	G	G	G	G	G	G	G	G	G	G	G	G	G	G	G	G	R	G	G	G	G	R	R	G	G	G	G	R	G	G	G	G	G	G	G	G	G	G	G	R	G	R	G
S1D_134739585	G/A	1D	134739585	+	G	G	G	G	G	G	R	G	G	G	G	G	A	G	G	G	R	G	G	G	G	R	G	G	G	G	R	G	G	G	G	R	G	G	G	G	G	G	G	G	G	G	G	G	A
S1D_134935942	T/C	1D	134935942	+	T	T	Y	T	T	T	Y	T	T	T	T	T	T	T	T	T	T	T	T	T	T	T	T	T	T	T	T	T	T	T	T	Y	T	T	T	T	Y	T	Y	T	Y	T	T	T	Y
S1D_135204019	T/A	1D	135204019	+	T	T	T	T	T	T	T	T	T	T	T	T	T	T	T	W	A	T	T	T	W	T	T	T	W	T	T	T	T	T	T	T	T	T	T	T	T	T	T	T	T	T	T	T	T
S1D_135204063	C/T	1D	135204063	+	C	C	C	C	C	C	C	C	C	C	C	Y	C	Y	C	C	C	C	C	Y	C	C	Y	C	C	Y	Y	C	C	C	C	C	C	C	Y	C	C	C	C	C	C	Y	C	Y	C
S1D_135256679	G/A	1D	135256679	+	G	G	G	G	G	G	A	G	G	G	G	G	G	G	G	G	G	G	G	G	G	G	G	A	G	G	G	G	G	G	G	G	G	G	G	G	G	G	G	G	G	G	G	G	G
S1D_136222122	T/C	1D	136222122	+	Y	T	T	T	T	Y	Y	T	Y	T	T	T	T	Y	T	T	T	T	T	T	T	Y	T	Y	T	T	T	C	Y	T	T	T	T	T	T	T	T	T	T	T	Y	T	T	T	T
S1D_136222134	A/C	1D	136222134	+	A	A	A	A	A	A	A	A	A	A	A	A	A	M	A	A	A	A	M	A	C	M	A	A	A	A	A	A	A	A	A	A	A	M	C	A	A	A	M	A	A	A	A	A	M
S1D_136222143	C/T	1D	136222143	+	C	C	C	C	C	C	C	C	C	C	C	C	C	C	Y	C	C	C	C	T	C	C	C	C	Y	C	C	C	C	C	C	C	C	C	C	C	C	C	C	C	C	C	C	Y	C
S1D_136222162	A/T	1D	136222162	+	A	A	A	A	A	A	A	A	A	A	A	A	A	A	A	A	A	A	A	A	A	A	A	A	A	A	A	A	A	W	A	A	A	A	A	W	A	A	W	A	A	A	A	A	A
S1D_136844001	T/G	1D	136844001	+	T	T	T	T	T	T	T	T	T	T	T	T	T	T	T	T	T	T	T	T	T	T	T	T	T	T	T	T	T	T	T	T	T	K	T	K	K	T	T	T	T	T	T	T	T
S1D_136844005	C/T	1D	136844005	+	C	C	C	C	C	Y	C	C	Y	T	C	C	C	C	C	C	C	C	C	C	Y	C	Y	C	C	C	C	C	C	Y	C	C	C	C	C	C	C	C	C	C	C	C	Y	C	C
S1D_136844017	C/G	1D	136844017	+	C	C	C	C	C	C	C	C	C	C	S	C	C	C	C	C	C	C	C	C	C	C	C	C	S	C	C	C	C	C	C	C	S	C	C	C	C	C	C	C	C	C	C	S	C
S1D_136844035	C/T	1D	136844035	+	C	C	C	C	C	C	C	C	C	C	C	C	C	C	C	C	C	C	C	C	C	C	C	C	C	C	C	C	C	C	C	C	C	Y	C	Y	Y	C	C	C	C	C	C	C	C
S1D_136844044	T/C	1D	136844044	+	T	T	T	T	T	T	T	T	T	T	T	T	T	T	T	T	T	T	T	T	T	T	T	T	T	T	T	T	T	T	T	T	T	Y	T	Y	Y	T	T	T	T	T	T	T	T
S1D_137499231	C/T	1D	137499231	+	C	C	C	C	C	C	C	C	C	C	C	C	C	C	C	Y	C	C	C	C	Y	Y	C	C	C	Y	C	C	C	C	C	C	C	C	Y	C	C	C	C	C	C	C	C	C	C
S1D_137961613	A/G	1D	137961613	+	A	A	R	A	R	A	A	R	A	A	R	A	A	R	A	A	A	A	A	A	A	A	A	A	A	R	A	A	A	A	A	A	R	A	R	A	A	A	A	R	A	A	R	A	A
S1D_137961623	G/A	1D	137961623	+	G	G	G	G	G	G	R	G	G	R	G	G	R	G	G	G	G	G	G	G	G	G	G	R	G	G	G	G	G	G	G	G	G	R	G	G	G	G	G	G	G	G	G	G	G
S1D_137961642	G/A	1D	137961642	+	G	G	R	G	R	G	G	R	G	G	R	G	G	R	G	G	G	G	G	G	G	G	G	G	G	R	G	G	G	G	G	G	R	G	R	G	G	G	G	R	G	G	R	G	G
S1D_137961648	C/T	1D	137961648	+	C	C	Y	C	Y	C	C	Y	C	C	Y	C	C	Y	C	C	C	C	C	C	C	C	C	C	C	Y	C	C	C	C	C	C	Y	C	Y	C	C	C	C	Y	C	C	Y	C	C
S1D_139083791	A/T	1D	139083791	+	A	A	A	A	A	A	A	W	A	A	A	A	A	T	A	A	A	T	A	A	A	A	A	W	A	A	T	A	A	A	T	T	W	A	W	T	A	A	T	A	A	A	T	A	A
S1D_139083794	T/A	1D	139083794	+	T	T	T	T	T	T	W	W	T	T	T	T	T	A	T	T	T	A	T	T	T	T	T	W	T	T	A	T	T	T	A	A	W	T	W	A	T	T	A	T	T	T	A	T	T
S1D_139083795	G/C	1D	139083795	+	G	G	G	G	G	G	S	S	G	G	G	G	G	C	G	G	G	C	G	G	G	G	G	S	G	G	C	G	G	G	C	C	S	G	S	C	G	G	C	G	G	G	C	G	G
S1D_139083796	A/C	1D	139083796	+	A	A	A	A	A	A	A	M	A	A	A	A	A	C	A	A	A	C	A	A	A	A	A	M	A	A	C	A	A	A	C	C	M	A	M	C	A	A	C	A	A	A	C	A	A
S1D_139107081	A/G	1D	139107081	+	A	A	R	A	A	A	A	A	A	A	A	A	R	A	A	A	A	A	A	R	A	A	R	A	A	A	A	A	A	A	A	A	A	A	A	A	A	A	A	A	A	A	A	A	A
S1D_139107109	T/C	1D	139107109	+	T	T	T	T	T	T	T	T	T	T	T	T	Y	T	T	T	T	T	T	Y	T	T	Y	T	T	T	T	T	T	T	T	T	T	T	T	T	T	T	T	T	T	T	T	T	T
S1D_139441812	C/A	1D	139441812	+	C	C	C	C	C	C	C	C	C	M	C	C	M	C	C	M	C	C	C	C	C	M	C	M	C	C	C	C	C	C	C	C	C	C	C	C	C	C	C	C	M	C	C	C	C
S1D_139441821	G/T	1D	139441821	+	G	G	K	G	G	K	G	G	G	G	K	G	G	G	G	G	G	G	K	G	G	G	G	G	G	G	G	G	G	G	G	G	G	G	G	G	G	G	G	K	G	G	G	G	G
S1D_139441829	G/T	1D	139441829	+	G	K	K	G	G	G	G	G	G	G	G	K	G	G	G	G	G	G	G	G	G	G	G	G	G	K	G	G	G	G	G	T	G	G	G	G	G	G	G	G	G	G	G	G	G
S1D_139441835	C/T	1D	139441835	+	C	C	C	C	C	C	C	C	C	C	C	C	C	C	C	C	C	Y	C	C	C	C	C	C	C	C	C	C	C	C	T	C	C	C	C	C	C	C	C	C	C	C	C	C	C
S1D_139441839	G/A	1D	139441839	+	G	G	G	G	G	G	G	G	G	R	G	G	R	G	G	R	G	G	G	G	G	R	G	R	G	G	G	G	G	G	G	G	G	G	G	G	G	G	G	G	R	G	G	G	G
S1D_139496404	C/T	1D	139496404	+	C	C	Y	C	Y	Y	C	C	C	C	C	T	C	C	C	C	C	C	C	C	C	C	C	C	C	C	Y	C	C	C	C	Y	C	C	C	C	C	C	C	C	C	C	C	C	T
S1D_139496424	T/G	1D	139496424	+	T	T	T	T	T	T	T	T	K	T	T	T	T	T	T	T	T	T	T	T	T	T	T	T	T	T	T	T	T	T	K	T	T	G	T	T	T	T	K	T	T	T	T	T	T
S1D_139496427	C/T	1D	139496427	+	C	C	C	C	C	C	C	C	C	C	Y	C	C	C	C	C	C	C	C	C	T	C	C	C	C	C	C	C	Y	Y	C	C	C	C	C	C	C	C	C	C	C	C	C	C	C
S1D_139594795	A/G	1D	139594795	+	A	A	A	A	A	A	A	A	A	A	A	A	A	A	A	A	A	A	A	A	R	A	A	A	A	A	A	A	A	A	R	A	A	A	A	R	A	A	R	A	A	A	R	A	A
S1D_139594831	C/A	1D	139594831	+	C	C	C	C	C	C	C	C	C	C	C	M	C	C	M	C	M	M	C	M	C	C	C	C	C	C	C	C	C	C	C	C	C	M	C	C	C	C	C	C	C	C	C	C	C
S1D_139895201	G/T	1D	139895201	+	G	G	G	G	G	G	K	K	G	G	G	G	G	K	K	G	G	G	G	G	G	G	G	G	G	K	G	G	K	G	G	G	G	G	G	G	G	K	G	G	K	G	G	K	G
S1D_139895219	A/T	1D	139895219	+	A	A	W	W	A	A	A	A	W	A	A	A	W	A	A	A	A	A	A	A	A	A	A	A	W	A	A	A	A	A	W	A	A	A	A	A	A	A	A	A	A	A	A	A	A
S1D_139895228	T/C	1D	139895228	+	T	T	T	Y	T	T	T	T	T	T	T	Y	T	T	T	T	T	T	T	T	T	T	T	Y	T	T	T	Y	Y	T	T	T	Y	Y	Y	T	T	T	T	Y	T	T	Y	T	T
S1D_139895235	G/A	1D	139895235	+	G	G	R	G	G	G	G	G	G	G	G	G	G	G	G	G	G	G	G	G	G	R	G	G	G	G	G	G	G	G	R	G	G	G	G	G	G	G	G	R	G	G	G	G	G
S1D_139895246	C/T	1D	139895246	+	C	C	C	C	C	Y	C	C	C	Y	C	C	C	C	C	C	C	C	Y	C	C	Y	Y	C	C	C	C	C	C	C	C	C	C	C	C	C	Y	Y	C	Y	C	C	C	Y	Y
S1D_139895248	A/G	1D	139895248	+	A	A	A	A	A	R	A	A	A	R	A	A	A	A	A	A	A	A	A	A	A	A	R	A	A	A	A	A	A	A	A	A	A	A	A	A	A	R	A	R	A	A	A	R	R
S1D_140055044	C/T	1D	140055044	+	C	C	C	Y	C	C	C	C	Y	C	Y	C	Y	C	C	C	C	C	C	C	C	C	Y	Y	Y	C	C	C	C	Y	C	Y	C	C	C	C	C	C	C	C	C	C	C	C	C
S1D_140055060	G/A	1D	140055060	+	G	G	G	R	G	G	G	G	R	G	R	G	R	G	G	G	G	G	G	G	G	G	R	R	R	G	G	G	G	R	G	R	G	G	G	G	G	G	G	G	G	G	G	G	G
S1D_140055096	G/T	1D	140055096	+	G	G	G	K	G	G	G	G	K	G	K	G	K	G	G	G	G	G	G	G	G	G	K	K	K	G	G	G	G	K	G	K	G	G	G	G	G	G	G	G	G	G	G	G	G
S1D_140180248	C/G	1D	140180248	+	C	C	C	C	C	C	C	C	C	C	C	C	C	C	C	C	C	G	C	C	C	C	C	C	C	C	S	C	C	C	G	G	C	C	C	G	C	C	G	C	C	C	C	C	C
S1D_141992381	C/G	1D	141992381	+	S	S	C	C	C	C	C	C	C	C	C	C	C	C	C	C	C	S	C	S	S	C	C	C	C	C	C	C	S	C	C	C	C	C	C	C	C	C	C	C	C	C	C	G	C
S1D_141992383	A/G	1D	141992383	+	A	A	A	R	A	A	R	R	A	A	A	A	A	R	A	A	A	A	A	A	A	A	A	A	A	A	A	A	A	A	A	A	A	A	A	R	A	G	A	A	A	A	A	A	A
S1D_141992390	C/A	1D	141992390	+	C	C	C	M	C	C	C	C	C	C	C	C	C	C	C	C	C	C	C	M	M	C	C	M	M	M	C	C	C	C	C	C	C	C	C	C	C	C	C	C	C	C	C	C	C
S1D_141992392	C/A	1D	141992392	+	M	C	C	C	C	C	C	C	C	C	C	C	C	C	C	C	C	C	C	C	C	C	C	C	C	C	C	C	C	C	C	C	C	C	C	C	C	C	C	C	C	M	C	C	C
S1D_141992404	T/C	1D	141992404	+	T	T	Y	T	T	T	Y	T	Y	T	T	Y	T	T	T	T	T	T	Y	T	T	T	Y	T	T	T	T	T	T	T	T	T	T	T	T	T	Y	T	T	Y	T	T	T	T	T
S1D_141992409	G/C	1D	141992409	+	G	G	G	G	G	G	G	G	G	G	S	G	G	S	G	G	C	G	G	G	G	G	G	G	G	S	G	G	G	G	G	G	G	G	S	G	S	G	G	G	S	S	G	G	G
S1D_141992411	C/G	1D	141992411	+	C	C	C	C	C	C	C	S	S	S	C	C	C	C	S	C	C	C	S	C	C	C	C	C	C	C	S	C	C	C	C	C	S	C	S	C	C	C	S	C	S	C	G	C	C
S1D_141992422	A/G	1D	141992422	+	A	A	R	A	A	A	R	A	R	A	A	R	A	A	A	A	A	A	A	A	A	A	G	A	A	A	A	A	A	A	A	A	A	A	A	A	R	A	A	R	A	A	A	A	A
S1D_141992424	T/A	1D	141992424	+	T	T	T	W	T	T	T	T	T	T	T	T	T	T	T	T	T	T	T	W	W	T	T	W	W	W	T	T	T	T	T	T	T	T	T	T	T	T	T	T	T	T	T	T	T
S1D_141992428	T/C	1D	141992428	+	Y	Y	T	T	T	T	T	T	T	T	T	T	T	T	T	T	T	Y	T	Y	T	T	T	T	T	T	T	T	Y	T	T	T	T	T	T	T	T	T	T	T	T	T	T	C	T
S1D_146234879	C/T	1D	146234879	+	C	C	C	C	C	C	C	C	Y	C	Y	C	C	C	C	C	C	C	C	C	C	C	C	C	C	C	C	C	C	Y	C	C	Y	C	C	C	C	Y	C	C	C	C	C	C	C
S1D_146234913	G/C	1D	146234913	+	G	G	G	G	G	G	G	G	G	G	G	G	G	G	G	G	G	G	G	S	S	G	G	G	G	G	G	S	G	G	G	G	G	G	G	G	G	G	G	G	G	G	S	G	S
S1D_146234916	G/A	1D	146234916	+	G	R	G	G	R	G	G	R	G	R	G	G	G	R	G	G	G	G	G	G	R	G	G	G	G	G	G	G	G	G	G	G	G	G	G	G	R	G	G	G	R	G	G	R	R
S1D_146234919	G/A	1D	146234919	+	G	G	R	G	G	G	G	G	G	G	G	G	G	G	G	G	G	G	G	G	G	G	G	G	R	G	G	G	R	G	G	G	R	G	G	R	G	G	G	G	G	R	G	G	G
S1D_146234929	T/C	1D	146234929	+	T	Y	T	T	Y	T	T	Y	T	T	T	T	T	Y	T	T	T	T	T	T	T	T	T	T	T	T	T	T	T	T	T	T	T	T	T	T	T	T	T	T	Y	T	T	Y	Y
S1D_148870830	C/A	1D	148870830	+	C	C	C	C	C	M	C	C	M	C	C	C	C	C	M	M	C	C	C	C	C	C	M	M	M	C	C	C	C	C	C	C	C	C	C	C	C	C	C	C	C	C	C	C	C
S1D_149871960	G/A	1D	149871960	+	G	G	G	G	G	G	G	G	G	G	G	G	G	G	G	R	R	G	G	G	G	G	G	G	G	G	R	G	R	G	G	G	G	G	G	G	G	G	G	G	G	G	G	G	G
S1D_149871966	G/A	1D	149871966	+	G	G	R	G	R	G	G	G	G	G	G	G	G	G	R	G	G	R	R	G	G	G	G	G	G	G	G	G	R	G	G	G	G	A	G	G	G	G	G	G	G	G	G	G	G
S1D_149871979	G/C	1D	149871979	+	G	G	G	G	G	G	S	S	G	G	G	G	G	G	G	S	G	G	G	G	G	G	G	G	G	G	G	G	G	G	G	G	S	G	G	G	G	G	G	G	G	G	G	G	G
S1D_149871998	A/T	1D	149871998	+	A	A	A	W	W	A	A	A	A	A	W	A	W	A	A	A	A	A	A	W	A	A	A	A	A	A	A	A	A	A	A	W	A	A	A	A	A	A	A	A	A	W	A	A	A
S1D_149943746	G/T	1D	149943746	+	G	G	G	G	G	G	G	K	K	G	G	G	G	G	G	G	G	G	G	G	G	G	G	G	G	G	G	G	G	G	G	G	G	G	G	G	G	K	G	K	G	G	G	G	G
S1D_149943748	G/A	1D	149943748	+	G	G	G	G	G	G	G	G	G	G	R	G	G	G	G	G	G	G	G	G	G	G	G	G	G	G	G	R	G	G	G	G	G	G	G	G	G	G	G	G	R	G	G	R	R
S1D_149943761	G/C	1D	149943761	+	G	G	G	G	G	S	S	S	S	G	G	S	S	G	G	G	G	G	G	G	G	G	G	G	G	S	G	S	S	G	G	G	G	G	G	G	G	G	G	G	S	G	G	S	S
S1D_149943764	C/A	1D	149943764	+	C	C	C	C	C	C	C	C	C	C	C	C	C	C	C	C	C	C	M	C	C	C	M	C	M	C	C	M	C	C	C	C	C	C	M	C	C	C	C	C	C	C	C	C	C
S1D_149943796	A/G	1D	149943796	+	A	A	A	A	R	A	A	R	R	A	A	A	A	A	A	A	A	A	A	A	A	R	A	A	A	A	A	A	A	A	A	A	A	R	A	A	A	R	A	R	A	A	R	R	A
S1D_150010196	C/T	1D	150010196	+	C	C	Y	C	C	C	C	Y	C	C	C	C	C	C	C	C	C	C	C	C	C	C	C	C	C	Y	C	Y	C	C	C	C	C	C	C	C	C	C	C	C	C	C	C	C	C
S1D_150010204	G/A	1D	150010204	+	G	R	G	G	G	R	G	G	G	R	G	G	G	G	G	G	G	G	G	G	G	G	G	G	G	R	G	G	G	G	R	G	G	G	G	G	G	G	G	G	R	G	G	G	G
S1D_150010205	C/T	1D	150010205	+	C	C	C	Y	C	C	C	C	C	C	C	C	C	C	C	C	C	C	C	C	C	C	C	C	C	C	C	C	C	C	C	C	C	C	Y	C	C	C	C	Y	C	C	C	C	C
S1D_150010206	G/A	1D	150010206	+	G	G	G	G	G	R	G	R	G	G	G	G	G	G	G	G	G	G	G	G	G	R	G	G	G	G	G	R	R	G	G	G	G	G	R	G	G	G	G	G	G	G	G	G	G
S1D_151751707	G/A	1D	151751707	+	R	G	G	G	G	R	R	R	G	G	R	G	R	G	G	R	R	G	G	G	G	G	G	G	G	R	G	G	G	G	G	G	G	G	G	R	G	G	G	G	G	G	R	G	G
S1D_151751733	G/A	1D	151751733	+	R	G	G	G	G	R	R	R	G	G	R	G	R	G	G	R	R	G	G	G	G	G	G	G	G	R	G	G	G	G	G	G	G	G	G	R	G	G	G	G	G	G	R	G	G
S1D_151874911	G/A	1D	151874911	+	G	G	G	G	G	G	G	R	G	G	G	G	G	G	G	G	G	G	G	R	G	G	G	G	R	G	G	G	R	G	G	G	G	G	G	G	G	G	G	G	G	G	G	G	R
S1D_152139488	T/A	1D	152139488	+	W	T	T	T	T	T	T	T	T	T	T	T	T	T	W	A	T	T	T	T	T	W	T	T	T	T	T	W	T	T	T	T	W	T	T	W	T	T	T	T	T	T	T	T	T
S1D_152139492	C/T	1D	152139492	+	C	C	Y	C	C	C	C	C	C	C	C	C	C	C	C	C	Y	C	C	C	C	C	C	C	C	C	C	C	C	C	C	C	C	C	C	C	C	C	C	C	C	Y	C	C	C
S1D_152139500	G/A	1D	152139500	+	G	G	R	G	G	G	G	G	G	G	G	G	G	G	G	G	R	G	G	G	G	G	G	G	G	G	G	G	G	G	G	G	G	G	G	G	G	G	G	G	G	R	G	G	G
S1D_152139504	G/A	1D	152139504	+	G	G	R	G	G	G	G	G	G	G	G	G	G	G	G	G	R	G	G	G	G	G	G	G	G	G	G	G	G	G	G	G	G	G	G	G	G	G	G	G	G	R	G	G	G
S1D_152139505	A/G	1D	152139505	+	R	A	A	A	A	A	A	A	A	A	A	A	A	A	R	G	A	A	A	A	A	R	A	A	A	A	A	R	A	A	A	A	R	A	A	R	A	A	A	A	A	A	A	A	A
S1D_152139516	T/C	1D	152139516	+	Y	T	T	T	T	T	T	T	T	T	T	T	T	T	Y	C	T	T	T	T	T	Y	T	T	T	Y	T	Y	T	T	T	T	Y	T	T	Y	T	T	T	T	T	T	T	T	T
S1D_152139518	C/G	1D	152139518	+	S	C	C	C	C	C	C	C	C	C	C	C	C	C	S	G	C	C	C	C	C	S	C	C	C	S	C	S	C	C	C	C	S	C	C	S	C	C	C	C	C	C	C	C	C
S1D_152464862	C/A	1D	152464862	+	C	C	C	C	C	C	C	C	C	C	M	C	C	C	C	C	C	C	C	C	C	C	C	C	M	C	C	C	M	C	C	C	C	M	M	C	M	C	C	C	C	C	C	C	C
S1D_152692790	C/T	1D	152692790	+	C	C	C	C	C	C	C	C	Y	C	C	C	C	C	C	C	C	Y	C	C	C	C	Y	C	C	C	C	C	C	C	C	C	C	C	C	C	C	C	C	C	C	C	C	C	C
S1D_152692810	C/T	1D	152692810	+	Y	C	C	Y	C	Y	C	Y	C	C	C	C	C	C	C	Y	C	C	C	C	C	C	C	Y	C	C	C	C	C	C	Y	C	C	C	C	C	C	C	C	Y	C	C	Y	C	C
S1D_152692826	G/A	1D	152692826	+	G	G	G	G	G	G	G	G	G	G	G	G	G	G	G	G	G	R	G	G	G	G	G	G	G	G	G	G	G	G	G	G	G	G	G	R	G	G	R	G	G	G	G	G	G
S1D_153319083	G/A	1D	153319083	+	G	G	G	G	G	G	G	G	G	G	G	G	G	R	G	G	G	G	G	G	G	R	G	G	G	G	G	G	G	G	G	G	R	G	G	G	G	G	G	G	G	R	G	G	G
S1D_153319088	C/T	1D	153319088	+	C	C	C	C	C	C	C	C	C	C	C	C	C	Y	C	C	C	C	C	C	C	Y	C	C	C	C	C	C	C	C	C	C	Y	C	C	C	C	C	C	C	C	Y	C	C	C
S1D_153483225	T/C	1D	153483225	+	T	T	T	T	T	T	T	T	Y	T	T	T	T	T	T	Y	T	T	C	T	T	T	T	T	T	T	T	T	T	Y	T	T	T	T	T	Y	T	T	T	T	T	T	T	T	T
S1D_154864790	C/T	1D	154864790	+	C	C	C	C	C	C	C	C	C	C	C	C	C	C	C	C	C	C	C	C	C	C	C	C	C	C	C	C	Y	C	C	C	C	C	Y	C	C	Y	C	Y	C	C	T	Y	C
S1D_154864793	A/C	1D	154864793	+	A	A	A	A	A	A	A	A	M	A	A	M	M	A	A	A	A	A	A	A	A	A	A	A	A	A	A	A	M	A	A	A	A	M	A	A	A	A	A	A	A	A	A	A	A
S1D_154864805	A/G	1D	154864805	+	A	A	A	A	A	A	A	A	A	A	A	A	A	A	A	R	R	A	A	A	A	A	A	A	A	A	A	A	A	A	R	A	A	A	A	A	A	A	A	A	A	A	A	A	A
S1D_154864808	A/G	1D	154864808	+	A	A	A	A	A	A	A	A	A	A	A	A	A	A	A	A	A	A	A	A	R	A	R	R	A	A	A	A	A	A	R	A	A	A	A	A	A	A	R	A	A	A	A	A	A
S1D_154864812	C/T	1D	154864812	+	C	C	C	C	C	C	T	C	C	C	C	Y	C	C	C	C	C	C	C	C	C	C	C	C	C	C	C	C	C	Y	C	C	C	C	C	C	C	C	C	C	Y	C	C	C	C
S1D_154864813	A/C	1D	154864813	+	A	A	A	A	A	A	C	A	A	A	A	M	A	A	A	A	A	A	A	A	A	A	A	A	A	A	A	A	A	M	A	A	A	A	A	A	A	A	A	A	M	A	A	A	A
S1D_154864824	A/G	1D	154864824	+	A	A	A	A	A	A	A	A	A	A	A	A	A	A	A	A	A	A	A	A	R	A	R	R	A	A	A	A	A	A	R	A	A	A	A	A	A	A	R	A	A	A	A	A	A
S1D_154864830	A/G	1D	154864830	+	A	A	A	A	A	A	A	G	A	A	A	A	A	A	A	A	A	A	A	R	A	A	A	A	A	A	A	A	R	A	A	A	A	A	R	A	R	R	A	R	A	A	G	R	A
S1D_154864832	C/A	1D	154864832	+	C	C	C	C	C	A	A	C	M	C	C	M	C	C	C	C	C	C	C	C	C	C	C	C	C	C	C	C	C	M	C	C	C	C	C	C	C	C	C	C	M	C	C	C	C
S1D_154864838	G/A	1D	154864838	+	G	G	G	G	R	G	G	G	R	G	G	R	R	G	G	G	G	G	G	G	G	G	G	G	G	G	G	G	R	G	G	G	G	R	G	G	G	G	G	G	G	G	G	G	G
S1D_156171330	C/T	1D	156171330	+	C	C	C	C	C	C	C	C	C	C	C	C	C	C	C	C	C	C	C	C	C	C	C	C	C	C	C	C	C	C	C	C	C	C	Y	C	C	Y	C	C	C	Y	C	Y	C
S1D_156171344	G/A	1D	156171344	+	G	G	G	G	G	G	G	G	G	G	G	G	G	G	G	G	G	G	G	G	G	G	G	G	R	G	G	G	G	G	G	G	G	G	G	G	G	G	G	G	G	G	G	G	G
S1D_156171350	A/G	1D	156171350	+	A	A	A	A	A	A	A	A	A	A	A	A	A	A	A	A	A	A	A	A	A	R	A	R	A	R	A	R	A	A	A	A	A	A	A	A	R	A	A	A	A	A	A	A	R
S1D_156171356	C/T	1D	156171356	+	C	C	C	Y	C	C	C	C	C	C	C	C	C	C	C	C	C	C	C	C	C	C	C	C	C	C	C	Y	C	C	C	C	C	Y	C	C	C	C	Y	C	C	C	C	C	C
S1D_156171358	C/T	1D	156171358	+	C	C	C	C	C	C	C	C	C	C	C	C	T	C	C	C	C	C	C	Y	C	C	C	C	C	C	C	C	C	Y	C	C	C	C	C	C	C	C	Y	Y	Y	C	C	C	C
S1D_156171362	T/G	1D	156171362	+	T	T	T	T	T	T	T	T	T	T	T	T	G	T	T	T	T	T	T	K	T	T	T	T	T	T	T	T	T	K	T	T	T	T	T	T	T	T	K	K	K	T	T	T	T
S1D_156171377	G/T	1D	156171377	+	G	G	G	G	G	G	G	G	G	G	G	G	G	G	G	G	G	G	G	G	G	K	G	K	G	K	G	K	G	G	G	G	G	G	G	G	K	G	G	G	G	G	G	G	K
S1D_156171379	C/A	1D	156171379	+	C	C	C	C	C	C	C	C	C	C	C	C	C	C	C	C	C	C	C	C	C	M	C	M	C	M	C	M	C	C	C	C	C	C	C	C	M	C	C	C	C	C	C	C	M
S1D_156669345	T/A	1D	156669345	+	T	T	T	T	W	T	W	T	W	T	T	T	T	T	T	W	T	T	T	T	T	T	T	W	T	T	T	T	T	T	T	T	T	T	W	T	T	T	T	T	W	W	T	T	T
S1D_157178115	C/T	1D	157178115	+	C	C	T	C	C	C	C	C	C	C	C	Y	C	C	C	C	C	C	C	C	C	C	C	C	C	C	C	C	C	C	C	C	C	C	C	C	Y	C	C	C	C	C	C	C	C
S1D_157178153	G/C	1D	157178153	+	G	G	C	G	G	G	G	G	G	G	G	S	G	G	G	G	G	G	G	G	G	G	G	G	G	G	G	G	G	G	G	G	G	G	G	G	S	G	G	G	G	G	G	G	G
S1D_157273711	G/A	1D	157273711	+	G	R	G	G	G	G	G	G	G	G	G	G	G	G	G	G	G	G	G	A	G	G	G	G	G	G	G	G	G	G	G	G	G	G	G	R	G	G	G	G	G	G	G	G	G
S1D_157273713	G/T	1D	157273713	+	G	G	K	G	G	G	G	G	G	G	G	G	G	K	G	G	G	G	G	G	G	K	G	G	G	G	G	G	G	K	G	G	G	G	G	G	G	G	G	G	G	G	G	G	G
S1D_157273715	T/C	1D	157273715	+	T	Y	T	T	T	T	T	T	T	T	T	T	T	T	T	T	T	T	T	C	T	T	T	T	T	T	T	T	T	T	T	T	T	T	T	Y	T	T	T	T	T	T	T	T	T
S1D_157273717	A/T	1D	157273717	+	A	W	A	A	A	A	A	A	A	A	A	A	A	A	W	A	A	A	A	A	A	A	A	W	A	A	A	A	W	A	A	A	A	A	A	A	A	W	A	A	A	A	A	A	A
S1D_157273719	T/G	1D	157273719	+	T	K	T	T	T	T	T	T	T	T	T	T	T	T	T	T	T	T	T	G	T	T	T	T	T	T	T	T	T	T	T	T	T	T	T	K	T	T	T	T	T	T	T	T	T
S1D_157273722	C/A	1D	157273722	+	C	C	C	C	M	C	C	C	C	M	C	M	C	C	M	C	C	C	M	C	M	C	M	C	C	C	C	C	C	C	C	C	C	C	C	C	A	C	C	M	M	M	C	C	C
S1D_157273729	G/T	1D	157273729	+	G	G	G	G	G	G	T	G	G	G	G	G	G	G	G	G	G	G	K	G	G	G	G	G	G	K	G	T	G	G	G	G	G	G	G	G	G	G	G	G	G	G	G	G	G
S1D_157273735	G/T	1D	157273735	+	G	G	G	G	G	G	G	G	G	G	G	G	G	G	G	T	G	G	G	G	G	G	G	G	K	G	G	G	G	G	G	G	G	G	G	K	G	K	G	G	G	G	G	G	G
S1D_157273745	A/C	1D	157273745	+	A	A	A	A	A	A	A	A	M	A	A	A	A	M	A	A	A	A	A	A	A	A	A	A	M	A	A	A	A	M	C	A	C	A	A	A	A	A	A	A	A	A	A	A	A
S1D_157334793	G/A	1D	157334793	+	G	G	G	G	G	G	G	G	G	G	G	G	G	G	G	G	G	A	G	G	G	G	G	G	G	G	A	G	G	G	A	A	G	G	G	A	G	G	A	G	G	G	A	G	G
S1D_162781687	G/T	1D	162781687	+	G	G	G	G	G	G	G	G	G	G	G	G	G	G	G	G	G	G	G	G	G	G	G	G	K	K	G	G	G	G	G	G	G	G	T	G	G	K	G	K	G	G	G	K	G
S1D_163547378	G/A	1D	163547378	+	G	G	G	G	G	G	G	G	G	G	G	G	G	G	G	G	G	G	G	G	G	G	G	G	G	G	G	R	G	R	G	G	G	G	G	G	G	G	G	G	G	G	G	G	G
S1D_163547390	G/T	1D	163547390	+	G	G	G	G	G	G	G	G	G	G	G	K	K	G	K	G	G	G	T	K	G	G	G	G	G	G	G	G	G	G	G	G	G	G	G	G	T	G	G	G	K	G	G	G	G
S1D_164020039	G/C	1D	164020039	+	G	G	G	S	G	G	S	G	G	G	G	S	G	G	G	G	G	G	G	G	G	G	G	G	G	G	G	G	G	S	C	S	G	G	G	S	G	G	S	G	G	G	G	G	S
S1D_164020048	C/T	1D	164020048	+	C	C	C	C	C	Y	C	C	C	C	C	C	C	C	C	Y	C	C	C	C	C	C	C	C	Y	Y	C	C	C	C	C	C	C	C	C	C	C	C	C	C	C	T	C	C	C
S1D_164020050	G/A	1D	164020050	+	G	G	R	G	A	G	R	G	G	G	G	G	G	G	R	G	G	A	G	G	G	G	G	G	G	G	R	R	G	R	G	G	R	G	G	G	G	G	R	G	G	G	G	G	R
S1D_164020055	T/A	1D	164020055	+	T	T	W	T	A	T	W	T	T	T	T	T	T	T	W	T	T	A	T	T	T	T	T	T	T	T	W	W	T	W	T	T	W	T	T	T	T	T	W	T	T	T	T	T	W
S1D_164020067	G/A	1D	164020067	+	G	G	R	G	A	G	G	G	G	R	R	G	G	G	R	G	G	A	G	G	G	G	R	G	G	G	R	R	G	G	G	G	R	G	G	G	G	G	R	G	G	G	G	G	R
S1D_164020091	G/A	1D	164020091	+	G	G	G	R	G	G	G	G	G	G	G	G	G	G	G	G	G	G	R	G	G	G	G	G	R	G	R	G	G	G	G	G	G	G	R	G	G	G	G	G	G	G	G	G	G
S1D_164020093	T/C	1D	164020093	+	T	T	T	Y	T	T	Y	T	T	T	T	Y	T	T	T	T	T	T	T	T	T	T	T	T	T	T	T	T	T	Y	C	Y	T	T	T	Y	T	T	Y	T	T	T	T	T	Y
S1D_166626647	C/A	1D	166626647	+	C	C	M	C	C	C	C	C	C	C	C	M	M	M	C	C	C	C	C	M	C	M	C	C	C	C	C	C	C	C	C	C	C	C	M	C	M	C	C	C	C	C	C	C	C
S1D_166626671	T/A	1D	166626671	+	T	T	T	T	W	T	T	T	T	T	T	W	T	T	T	T	T	T	W	T	T	T	T	T	T	T	W	T	T	T	T	W	T	T	T	T	T	T	T	T	T	T	T	T	T
S1D_166626680	C/T	1D	166626680	+	C	C	C	C	C	C	C	Y	Y	C	C	C	Y	C	C	Y	C	C	C	C	Y	C	C	C	C	C	C	C	C	C	C	Y	C	C	C	C	C	Y	C	C	C	C	C	C	C
S1D_166626689	C/T	1D	166626689	+	C	C	C	C	Y	C	C	C	C	C	C	Y	C	C	C	C	C	C	Y	C	C	C	C	C	C	C	Y	C	C	C	C	Y	C	C	C	C	C	C	C	C	C	C	C	C	C
S1D_166626691	A/C	1D	166626691	+	A	A	A	A	A	A	M	A	A	A	A	A	A	A	A	M	A	M	A	A	A	A	A	A	A	A	A	A	A	A	A	A	A	A	A	A	A	A	A	A	A	M	A	A	A
S1D_167010741	C/T	1D	167010741	+	C	C	C	C	C	C	C	C	C	C	C	C	C	C	C	C	C	T	C	C	C	C	C	C	C	C	T	C	C	C	T	T	C	C	C	Y	C	C	Y	C	C	C	C	C	C
S1D_167827135	G/C	1D	167827135	+	G	G	G	G	G	G	G	G	G	G	G	G	G	G	G	G	G	G	G	G	G	G	G	S	S	S	S	G	G	G	G	G	G	G	G	G	G	G	G	G	G	G	G	G	G
S1D_167827148	T/G	1D	167827148	+	T	T	T	T	T	T	T	T	T	T	T	T	G	T	T	T	T	T	T	T	T	T	T	T	T	T	T	T	T	T	T	T	K	G	T	T	T	T	T	T	T	T	T	T	T
S1D_167827166	T/C	1D	167827166	+	T	T	Y	Y	T	T	T	T	Y	Y	T	T	T	T	T	T	T	Y	T	T	T	T	Y	T	T	T	T	T	T	T	T	T	T	T	C	T	T	T	T	T	T	T	T	T	T
S1D_167827179	C/A	1D	167827179	+	C	C	C	C	C	C	C	C	C	C	C	C	A	C	C	C	C	C	C	C	C	C	C	C	C	C	C	C	C	C	C	C	M	A	C	C	C	C	C	C	C	C	C	C	C
S1D_170919500	G/A	1D	170919500	+	G	G	G	G	G	G	G	G	G	G	G	G	G	G	G	G	G	R	G	G	G	G	G	G	G	G	R	G	G	G	A	R	G	G	G	R	G	G	R	G	G	G	G	G	G
S1D_170919538	A/G	1D	170919538	+	A	A	A	A	A	A	A	A	A	A	A	A	A	A	A	A	A	R	A	A	A	A	A	A	A	A	R	A	A	A	G	R	A	A	A	R	A	A	R	A	A	A	A	A	A
S1D_171451113	G/A	1D	171451113	+	G	R	G	R	G	A	G	G	G	G	R	G	G	G	G	G	G	G	G	G	G	G	G	G	G	G	G	A	G	G	G	G	G	G	G	G	G	G	G	G	G	G	G	G	G
S1D_172479691	G/A	1D	172479691	+	G	G	G	G	G	G	G	G	G	G	G	G	G	G	G	G	G	R	G	G	G	G	G	G	G	G	R	G	G	G	R	R	G	G	G	R	G	G	R	G	G	G	G	G	G
S1D_173447627	G/C	1D	173447627	+	G	S	G	S	G	G	G	G	G	G	C	G	S	G	G	G	G	G	G	G	G	G	G	G	G	S	G	G	S	S	C	G	G	G	S	G	G	S	G	G	C	G	S	G	S
S1D_173447635	C/A	1D	173447635	+	C	C	M	C	C	M	M	C	C	C	C	C	C	C	C	C	C	C	A	M	M	M	C	C	C	C	C	C	C	M	C	C	M	C	C	C	C	C	M	M	C	C	C	C	C
S1D_173447648	C/G	1D	173447648	+	C	S	C	S	C	C	C	C	C	C	C	C	C	C	S	C	S	C	C	C	C	C	C	C	C	C	C	C	C	C	C	C	C	S	C	C	C	C	C	C	C	C	C	C	C
S1D_173447666	A/G	1D	173447666	+	G	A	A	A	A	A	A	A	R	G	A	A	R	R	A	R	A	A	A	A	A	A	A	A	R	A	A	A	A	A	A	A	R	A	A	A	A	A	A	A	A	A	R	A	A
S1D_173447674	T/C	1D	173447674	+	T	T	T	T	T	T	T	T	T	T	T	T	T	T	T	T	T	T	T	T	T	T	T	T	Y	T	T	T	T	T	T	T	T	T	T	T	T	T	T	T	T	T	T	T	T
S1D_173447675	A/T	1D	173447675	+	A	W	W	A	A	W	A	A	A	A	A	A	A	A	A	W	A	A	A	W	W	A	W	T	A	W	A	A	A	A	A	A	A	W	A	A	A	A	A	A	A	A	A	A	A
S1D_174638165	G/A	1D	174638165	+	G	G	G	G	G	G	G	R	R	G	G	G	G	G	G	R	G	G	R	G	G	G	G	R	G	G	R	G	G	G	G	G	G	G	R	G	R	G	G	R	G	G	G	G	G
S1D_174827578	T/A	1D	174827578	+	T	T	T	T	T	T	T	T	T	T	T	T	A	T	T	T	T	T	T	T	T	T	T	T	T	T	T	W	T	T	T	T	W	T	T	T	T	T	W	T	T	T	T	T	T
S1D_174827587	C/G	1D	174827587	+	C	S	C	C	C	C	C	C	C	C	S	G	C	S	C	C	G	S	C	G	G	C	C	C	C	G	C	C	S	C	C	C	C	C	C	C	C	C	C	C	C	C	C	C	C
S1D_175513448	C/G	1D	175513448	+	C	G	C	C	C	C	C	C	C	C	C	C	S	C	C	C	C	G	C	C	C	S	C	C	C	C	C	C	C	C	G	C	C	S	C	C	C	C	C	C	C	C	C	C	C
S1D_175513456	A/T	1D	175513456	+	T	A	A	A	A	A	A	A	A	A	A	A	A	A	A	A	T	A	A	A	A	A	A	A	A	A	A	A	A	A	A	A	A	A	A	A	A	A	A	A	A	A	A	A	A
S1D_175513465	C/T	1D	175513465	+	T	C	Y	C	C	C	C	C	C	C	C	C	C	C	C	C	T	C	C	C	C	C	C	C	C	C	C	C	C	C	C	C	C	C	C	C	C	C	C	C	C	C	C	C	C
S1D_175513467	C/T	1D	175513467	+	C	C	C	Y	Y	C	C	C	C	C	C	T	C	C	C	C	C	C	C	C	C	C	Y	Y	Y	C	Y	C	C	Y	C	C	C	C	C	C	C	Y	C	C	C	C	C	Y	C
S1D_175513479	T/A	1D	175513479	+	T	A	T	T	T	T	T	T	T	T	T	T	W	T	T	T	T	A	W	T	W	W	T	T	T	T	T	T	T	T	A	T	T	W	T	T	T	T	T	T	T	T	T	T	W
S1D_175513486	A/G	1D	175513486	+	A	G	A	A	A	A	A	A	A	A	A	A	R	A	A	A	A	G	A	A	A	R	A	A	A	A	A	A	A	A	G	A	A	R	A	A	A	A	A	A	A	A	A	A	A
S1D_175513487	C/T	1D	175513487	+	C	C	C	C	C	C	T	Y	C	C	C	C	C	C	C	Y	C	C	C	C	C	C	Y	C	C	C	C	C	Y	C	C	C	C	C	C	C	Y	C	Y	C	C	C	C	C	C
S1D_175513490	C/T	1D	175513490	+	C	C	C	C	C	C	C	C	C	C	C	C	Y	C	C	Y	C	C	C	C	C	C	C	C	C	Y	C	C	C	Y	C	C	C	C	C	C	C	Y	Y	C	T	C	C	C	C
S1D_175513492	A/G	1D	175513492	+	G	A	R	A	A	A	A	A	A	A	A	A	A	A	A	A	G	A	A	A	A	A	A	A	A	A	A	A	A	A	A	A	A	A	A	A	A	A	A	A	A	A	A	A	A
S1D_176933704	G/C	1D	176933704	+	G	G	G	G	G	G	G	G	G	G	G	G	G	G	G	S	G	G	G	G	G	S	G	G	G	G	G	G	G	G	G	G	G	G	G	G	G	S	G	G	G	S	G	G	G
S1D_176933721	A/G	1D	176933721	+	R	A	R	A	R	A	A	A	A	A	R	A	R	A	R	A	A	A	A	A	A	A	R	A	A	A	A	A	R	A	A	A	A	A	A	A	A	R	A	A	A	R	A	A	A
S1D_176933741	T/A	1D	176933741	+	T	T	T	T	T	T	T	T	T	T	T	T	T	W	T	T	T	T	T	T	T	T	T	T	T	T	T	T	T	T	T	T	W	T	T	T	T	T	T	T	T	T	T	T	T
S1D_176933744	A/G	1D	176933744	+	R	A	A	A	A	A	A	A	A	A	A	A	A	R	A	R	A	A	R	A	A	R	A	A	A	A	A	A	A	R	A	A	A	R	A	A	A	A	A	R	R	A	A	A	A
S1D_176933745	A/G	1D	176933745	+	A	A	A	A	A	A	A	R	A	A	R	A	A	A	A	A	A	A	A	A	A	A	A	A	A	G	A	A	R	A	A	A	A	A	A	A	A	A	A	R	A	A	A	A	A
S1D_182225867	C/T	1D	182225867	+	C	C	C	C	C	C	T	C	C	C	C	C	C	C	C	C	C	T	C	C	C	C	C	T	C	C	T	C	C	C	T	T	C	C	C	T	C	C	T	C	C	C	C	C	C
S1D_183645261	T/C	1D	183645261	+	T	T	T	Y	T	T	T	T	T	Y	T	T	T	T	T	T	T	T	T	T	T	T	T	T	Y	Y	T	T	T	T	T	T	T	Y	T	T	T	Y	T	T	T	T	T	T	T
S1D_183645266	A/G	1D	183645266	+	A	R	A	A	R	A	R	A	A	A	A	R	A	A	A	R	A	A	A	A	R	A	R	A	A	A	R	A	A	A	A	A	A	R	A	A	A	A	A	R	R	A	A	R	A
S1D_183645271	G/C	1D	183645271	+	S	G	G	S	G	S	G	G	G	G	S	G	G	G	G	G	G	G	G	G	G	G	S	G	G	G	G	G	G	G	G	G	G	G	G	G	G	G	G	G	G	G	S	G	G
S1D_183645274	C/T	1D	183645274	+	C	C	Y	C	C	C	C	C	C	C	C	C	C	C	C	C	C	C	C	C	C	C	C	Y	Y	C	C	C	C	C	C	C	C	C	T	C	C	C	C	C	Y	Y	C	Y	C
S1D_183645282	G/T	1D	183645282	+	G	G	G	G	G	G	G	G	G	G	G	G	G	K	K	G	G	G	G	G	G	K	G	G	G	K	G	G	G	G	G	G	G	K	G	G	G	G	G	G	G	G	G	G	G
S1D_183645304	A/T	1D	183645304	+	A	W	A	A	A	A	A	A	A	W	A	A	W	A	W	A	A	A	A	A	A	A	A	A	A	A	A	A	A	A	A	A	A	A	A	A	A	A	A	A	A	A	W	W	A
S1D_183645305	T/A	1D	183645305	+	T	T	T	W	T	T	W	T	T	T	T	T	T	T	T	T	W	T	T	T	T	T	T	T	T	W	T	T	W	T	T	T	T	T	T	T	T	W	T	T	T	T	T	T	W
S1D_184932546	G/C	1D	184932546	+	G	G	S	G	G	G	C	G	G	G	G	G	G	G	G	G	G	C	G	G	G	G	G	C	G	G	C	G	G	G	C	C	G	G	G	C	G	G	C	G	G	G	C	G	G
S1D_184966595	C/A	1D	184966595	+	C	C	C	C	C	C	C	C	C	C	C	C	M	C	C	C	M	C	C	C	C	C	C	C	C	C	C	M	C	C	C	C	C	M	C	C	C	C	C	C	C	C	C	C	C
S1D_184966600	C/T	1D	184966600	+	C	C	Y	C	C	C	Y	Y	C	C	C	C	Y	C	C	C	Y	C	Y	C	C	C	C	C	Y	C	C	Y	C	C	C	C	C	C	C	Y	C	C	C	C	Y	C	C	Y	C
S1D_184966602	C/A	1D	184966602	+	C	C	C	C	M	C	C	C	C	C	C	C	C	C	C	C	C	C	C	C	C	M	M	C	C	C	M	C	C	C	C	C	M	C	M	C	M	C	C	C	C	C	C	C	C
S1D_184966618	G/A	1D	184966618	+	G	G	G	G	G	G	G	G	G	R	G	G	G	G	G	G	G	G	G	R	G	G	G	G	G	G	G	G	G	G	G	G	G	G	R	R	G	G	G	G	G	G	G	G	R
S1D_185019988	A/C	1D	185019988	+	C	A	A	A	A	A	A	A	A	M	A	A	M	A	M	A	A	M	A	A	A	C	A	M	A	A	A	A	A	A	M	M	A	A	A	A	A	A	A	A	A	A	A	M	A
S1D_185020022	A/C	1D	185020022	+	A	A	A	M	A	A	A	A	A	A	A	A	A	A	A	A	A	A	A	A	A	A	A	A	A	C	M	A	A	A	A	A	A	A	A	A	A	A	A	A	A	M	A	A	A
S1D_186783704	C/T	1D	186783704	+	C	C	C	C	C	C	C	Y	C	Y	C	Y	C	C	C	C	C	C	C	C	C	C	Y	Y	C	C	C	C	C	Y	C	Y	C	C	C	C	C	C	C	C	C	C	C	C	C
S1D_186783706	G/T	1D	186783706	+	G	G	G	G	G	G	G	K	G	K	G	K	G	G	G	G	G	G	G	G	G	G	K	K	G	G	G	G	G	K	G	K	G	G	G	G	G	G	G	G	G	G	G	G	G
S1D_187684290	G/A	1D	187684290	+	G	G	G	R	G	R	R	A	G	G	G	G	R	G	G	G	G	G	G	G	G	G	G	G	R	G	G	A	A	G	R	A	G	G	G	G	G	G	G	G	G	G	G	G	G
S1D_187684312	C/T	1D	187684312	+	C	C	C	C	C	C	C	C	C	C	C	C	C	C	Y	C	C	C	C	C	C	C	C	C	C	C	Y	C	C	C	C	C	C	C	C	C	C	C	C	C	C	C	C	C	Y
S1D_187684314	G/A	1D	187684314	+	G	G	R	G	G	R	G	G	G	G	G	G	G	G	G	G	G	G	G	G	G	G	R	G	R	R	R	G	G	G	R	G	R	R	G	G	G	G	R	G	G	G	G	G	G
S1D_187684316	G/A	1D	187684316	+	G	G	G	G	G	G	G	G	G	R	G	G	G	G	G	G	G	G	G	G	G	G	G	G	G	G	G	G	G	G	G	G	G	G	G	G	G	G	G	G	G	G	G	R	G
S1D_187684319	G/A	1D	187684319	+	G	R	G	G	A	G	G	G	G	G	G	G	G	G	R	G	G	G	G	R	G	G	R	G	G	G	R	G	G	G	G	G	G	G	G	G	G	G	G	G	G	G	G	G	G
S1D_187684322	C/A	1D	187684322	+	C	M	C	C	A	C	C	C	C	C	C	C	C	C	M	C	C	C	C	M	C	C	M	C	C	C	M	C	C	C	C	C	C	C	C	C	C	C	C	C	C	C	C	C	C
S1D_187684328	C/T	1D	187684328	+	C	C	C	C	C	C	C	C	C	Y	C	C	C	C	C	C	C	C	C	C	C	C	C	C	C	C	C	C	C	C	C	C	C	C	C	C	C	C	C	C	C	C	C	Y	C
S1D_187684329	G/A	1D	187684329	+	G	G	G	G	G	G	G	G	G	R	G	G	G	R	G	G	G	G	G	G	G	G	G	G	G	G	G	G	G	G	R	G	G	G	G	G	G	G	G	G	G	G	G	G	G
S1D_187684331	G/T	1D	187684331	+	G	G	G	G	G	G	G	G	G	G	G	G	G	G	K	G	G	G	G	G	G	G	G	G	G	G	K	G	G	G	G	G	G	G	G	G	G	G	G	G	G	G	G	G	K
S1D_187684342	G/C	1D	187684342	+	G	G	G	G	G	S	G	G	G	G	G	G	G	G	G	G	G	G	G	G	G	G	S	G	S	G	G	G	G	G	S	G	G	G	G	G	G	G	S	G	G	G	G	G	G
S1D_189630444	C/T	1D	189630444	+	C	C	C	C	C	C	C	C	C	C	C	C	C	C	C	C	C	C	C	C	C	C	C	C	C	C	C	C	C	C	Y	C	C	C	C	Y	C	C	Y	Y	C	C	Y	C	C
S1D_190374984	G/C	1D	190374984	+	G	G	G	G	G	G	G	G	G	G	G	G	G	G	G	G	G	S	G	G	G	G	G	G	G	G	G	G	G	G	S	S	G	G	G	S	G	G	S	G	G	G	G	G	G
S1D_191116079	A/G	1D	191116079	+	A	A	A	A	A	A	A	R	A	A	A	A	A	A	A	A	A	A	A	A	A	A	R	A	A	A	R	A	A	A	A	A	A	R	A	A	A	A	A	R	A	A	A	A	A
S1D_191116094	T/C	1D	191116094	+	T	T	T	T	T	T	T	T	Y	T	T	T	T	Y	T	Y	Y	T	T	T	T	T	Y	Y	T	T	T	T	T	T	T	T	T	T	T	T	T	T	T	T	T	T	T	T	Y
[truncated: 30,268 more rows]
[truncated: 111 more columns]

## Sheet: Table S4
Table S4. Population structures of 156 synthetic hexaploid wheat (SHW) lines generated using the SNPs based on Chinese Spring IWGSC RefSeq v2.1 and Ae. tauschii Aet v4.0 genomes.
[truncated: 158 more rows]

[truncated: 2 more sheets: Table S5, Table S6]
