# Supplementary material
Source: Research Square preprint supplement (doi:10.21203/rs.3.rs-9657677/v1)
Supplement: Supplementary file 2 [file c22c012f4ede1b8aadae8c35.docx]

**SUPPLEMENTAL MATERIAL**

**Supplemental Figures**

**Figure S1**. SNP distribution and density across the 21 wheat and seven *Ae. tauschii* chromosomes. Heatmaps illustrate the number of SNPs within a 1 Mb sliding window based on (**a**) the Chinese Spring IWGSC RefSeq v2.1 genome and (**b**) the *Ae. tauschii* Aet v4.0 genome. The vertical axis displays chromosomes, while the horizontal axis indicates physical position (Mb). The color gradient represents SNP density, with dark green and deep red indicating low and high densities, respectively.

**Figure S2**. The Q-Q plots showing four models with Chinese Spring IWGSC RefSeq v2.1 genome.

**Figure S3**. The Q-Q plots showing four models with *Ae. tauschii* Aet v4.0 genome.

**Supplemental Figures**

**Table S1**.Seedling reaction of synthetic hexaploid wheat (SHW) lines and their available durum wheat parents to greenbug biotype E.

**Table S2**.Population structure of 156 synthetic hexaploid wheat (SHW) lines generated using the SNPs based on Chinese Spring IWGSC RefSeq v2.1 and *Ae. tauschii* Aet v4.0 genomes.

**Table S3**.The GBS dataset based on Wheat Chinese Spring IWGSC RefSeq v2.1 genome.

**Table S4**.The GBS dataset based on *Ae. tauschii* Aet v4.0 genome.

**Table S5**. The significant SNPs associated with greenbug resistance detected using four models with Chinese Spring IWGSC RefSeq v2.1 genome.

**Table S6**. The significant SNPs associated with greenbug resistance detected using four models with *Ae. tauschii* Aet v4.0 genome.
